# Supplementary material for: Opposite polarity programs regulate asymmetric subsidiary cell divisions in grasses
Source: eLife. 2022 Dec 20;11:e79913. doi: 10.7554/eLife.79913 (PMC9767456; doi:10.7554/eLife.79913)
Supplement: Figure 1—figure supplement 1—source data 1. [file elife-79913-fig1-figsupp1-data1.xlsx]

## Sheet: B_SC defects
Quantifications of defective SCs in bdpolar-1, bdpolar-2, bdpolar-3, and WT control.
genotypes	defective SCs	SCs
bdpolar-3	34	106
bdpolar-3	19	84
bdpolar-3	23	84
bdpolar-3	18	91
bdpolar-2	28	80
bdpolar-2	30	78
bdpolar-2	29	68
bdpolar-2	31	76
WT	1	116
WT	0	146
WT	1	110
WT	1	68
WT	2	86
bdpolar-1	21	108
bdpolar-1	16	64
bdpolar-1	24	98
bdpolar-1	22	82
bdpolar-1	27	76
