# Supplementary material for: Opposite polarity programs regulate asymmetric subsidiary cell divisions in grasses
Source: eLife. 2022 Dec 20;11:e79913. doi: 10.7554/eLife.79913 (PMC9767456; doi:10.7554/eLife.79913)
Supplement: Figure 1—source data 1. [file elife-79913-fig1-data1.xlsx]

## Sheet: 1D_SC defects
Quantifications of defective SCs of segregating lines after crossing (bdpolar-1;+/+, bdpolar-1;bdpan1-1/+, and bdpolar-1;bdpan1-1) parental lines bdpolar-1 and bdpan1-1, and WT control.
genotypes	defective SCs	SCs
WT	1	146
WT	2	124
WT	2	114
WT	0	76
WT	3	110
WT	2	136
bdpan1-1/bdpan1-1	48	98
bdpan1-1/bdpan1-1	38	80
bdpan1-1/bdpan1-1	30	76
bdpan1-1/bdpan1-1	30	82
bdpan1-1/bdpan1-1	35	86
bdpan1-1/bdpan1-1	32	90
bdpan1-1/bdpan1-1	45	96
bdpan1-1/bdpan1-1	29	76
bdpan1-1/bdpan1-1	30	90
bdpolar-1/bdpolar-1	11	82
bdpolar-1/bdpolar-1	29	98
bdpolar-1/bdpolar-1	15	96
bdpolar-1/bdpolar-1	23	84
bdpolar-1/bdpolar-1	19	84
bdpolar-1/bdpolar-1	14	112
bdpolar-1/bdpolar-1	21	114
bdpolar-1/bdpolar-1	15	118
bdpolar-1/bdpolar-1	11	74
bdpolar-1/bdpolar-1; +/+	21	94
bdpolar-1/bdpolar-1; +/+	30	102
bdpolar-1/bdpolar-1; +/+	19	74
bdpolar-1/bdpolar-1; +/+	13	68
bdpolar-1/bdpolar-1; +/+	31	124
bdpolar-1/bdpolar-1; +/+	10	98
bdpolar-1/bdpolar-1; +/+	14	120
bdpolar-1/bdpolar-1; +/+; bdpan1-1/+	28	80
bdpolar-1/bdpolar-1; +/+; bdpan1-1/+	41	98
bdpolar-1/bdpolar-1; +/+; bdpan1-1/+	50	128
bdpolar-1/bdpolar-1; +/+; bdpan1-1/+	22	104
bdpolar-1/bdpolar-1; +/+; bdpan1-1/+	16	86
bdpolar-1/bdpolar-1; +/+; bdpan1-1/+	33	78
bdpolar-1/bdpolar-1; +/+; bdpan1-1/+	31	128
bdpolar-1/bdpolar-1; +/+; bdpan1-1/+	30	94
bdpolar-1/bdpolar-1; +/+; bdpan1-1/+	23	106
bdpolar-1/bdpolar-1; bdpan1-1/bdpan1-1	81	94
bdpolar-1/bdpolar-1; bdpan1-1/bdpan1-1	113	124
bdpolar-1/bdpolar-1; bdpan1-1/bdpan1-1	84	90
bdpolar-1/bdpolar-1; bdpan1-1/bdpan1-1	58	90
bdpolar-1/bdpolar-1; bdpan1-1/bdpan1-1	65	92
bdpolar-1/bdpolar-1; bdpan1-1/bdpan1-1	80	100
bdpolar-1/bdpolar-1; bdpan1-1/bdpan1-1	45	78
bdpolar-1/bdpolar-1; bdpan1-1/bdpan1-1	71	82
