# Supplementary material for: Opposite polarity programs regulate asymmetric subsidiary cell divisions in grasses
Source: eLife. 2022 Dec 20;11:e79913. doi: 10.7554/eLife.79913 (PMC9767456; doi:10.7554/eLife.79913)
Supplement: Figure 2—source data 1. [file elife-79913-fig2-data1.xlsx]

## Sheet: 2E_BdPOLAR-mVenus
Quantification of fluorescence intensity of BdPOLAR-mVenus lines (DZ193) along the SMC circumference using manual tracing. X is the position along the circumference and Y is the gray value.
DZ193-3 #1 POME-2 crop2		DZ193-3 #5 POME crop1		DZ193-3 #5 POME crop2		DZ193-3 #6 POME		DZ193-3 #7 POME		DZ193-4 #6 POME crop1		DZ193-4 #6 POME crop2		DZ193-4 #6 POME crop3
X	Y	X	Y	X	Y	X	Y	X	Y	X	Y	X	Y	X	Y	x position	averages	std dev	nomalized average	normalized st.dev	normalized std err
0	110.287	0	59.494	0	63.828	0	69.88	0	124.46	0	35.106	0	159.75	0	40.96	0	82.9706	41.0906	0.55	0.27	0.07
0.0902	108.876	0.0902	70.127	0.0902	64.032	0.0902	82.48	0.0902	105.346	0.0902	45.446	0.0902	177.95	0.0902	49.72	0.0902	87.9971	40.3551	0.59	0.27	0.06
0.1804	110.31	0.1804	78.825	0.1804	53.367	0.1804	58.8	0.1804	126.663	0.1804	39.573	0.1804	205.3	0.1804	34.74	0.1804	88.4472	53.6986	0.59	0.36	0.07
0.2706	90.398	0.2706	75.434	0.2706	65.147	0.2706	74.56	0.2706	121.093	0.2706	31.593	0.2706	152.75	0.2706	47.56	0.2706	82.3169	36.5941	0.55	0.24	0.06
0.3608	82.75	0.3608	74.49	0.3608	48.02	0.3608	62.84	0.3608	114.358	0.3608	30.594	0.3608	133	0.3608	46	0.3608	74.0065	32.8903	0.49	0.22	0.06
0.4509	77.385	0.4509	73.207	0.4509	42.578	0.4509	61.2	0.4509	119.732	0.4509	43.285	0.4509	162.85	0.4509	47.54	0.4509	78.4721	39.7375	0.52	0.26	0.06
0.5411	72.023	0.5411	72.683	0.5411	50.012	0.5411	59.88	0.5411	126.236	0.5411	34.497	0.5411	161.25	0.5411	49.04	0.5411	78.2026	40.5644	0.52	0.27	0.06
0.6313	65.221	0.6313	69.004	0.6313	48.985	0.6313	66.52	0.6313	109.719	0.6313	42.559	0.6313	151.85	0.6313	36.98	0.6313	73.8547	36.1923	0.49	0.24	0.06
0.7215	71.175	0.7215	65.437	0.7215	43.248	0.7215	54	0.7215	102.355	0.7215	27.01	0.7215	154.1	0.7215	44	0.7215	70.1656	38.1403	0.47	0.25	0.06
0.8117	88.532	0.8117	48.924	0.8117	46.683	0.8117	43.28	0.8117	105.57	0.8117	39.344	0.8117	148	0.8117	44	0.8117	70.5416	37.0944	0.47	0.25	0.06
0.9019	90.322	0.9019	53.4	0.9019	49.253	0.9019	44.72	0.9019	101.302	0.9019	37.08	0.9019	119.95	0.9019	45.54	0.9019	67.6959	29.3096	0.45	0.2	0.06
0.9921	87.05	0.9921	48.334	0.9921	40.16	0.9921	43.28	0.9921	100.628	0.9921	37.778	0.9921	121.95	0.9921	47.92	0.9921	65.8875	30.3971	0.44	0.2	0.06
1.0823	90.032	1.0823	49.881	1.0823	36.532	1.0823	43.36	1.0823	105.7	1.0823	30.57	1.0823	129.15	1.0823	36.12	1.0823	65.1681	35.2223	0.43	0.23	0.06
1.1724	87.171	1.1724	54.382	1.1724	26.729	1.1724	42.64	1.1724	130.987	1.1724	37.323	1.1724	121.95	1.1724	34.32	1.1724	66.9377	38.4769	0.45	0.26	0.06
1.2626	77.165	1.2626	51.953	1.2626	34.055	1.2626	32.48	1.2626	120.704	1.2626	45.176	1.2626	104	1.2626	39.22	1.2626	63.0941	31.5948	0.42	0.21	0.06
1.3528	71.991	1.3528	38.543	1.3528	25.44	1.3528	25.28	1.3528	88.462	1.3528	37.496	1.3528	106.9	1.3528	39.34	1.3528	54.1815	28.8881	0.36	0.19	0.05
1.443	69.506	1.443	37.119	1.443	27.413	1.443	42.36	1.443	85.864	1.443	24.225	1.443	106.9	1.443	37.44	1.443	53.8534	28.156	0.36	0.19	0.05
1.5332	66.26	1.5332	34.874	1.5332	27.245	1.5332	35.36	1.5332	94.294	1.5332	25.607	1.5332	126.2	1.5332	39.66	1.5332	56.1875	34.2589	0.37	0.23	0.06
1.6234	68.255	1.6234	34.421	1.6234	20.613	1.6234	26.64	1.6234	90.482	1.6234	31.179	1.6234	126.888	1.6234	42.88	1.6234	55.1698	34.8692	0.37	0.23	0.06
1.7136	63.856	1.7136	36.131	1.7136	20.941	1.7136	39.6	1.7136	103.219	1.7136	28.294	1.7136	118.432	1.7136	40.72	1.7136	56.3991	33.6931	0.38	0.22	0.06
1.8038	59.701	1.8038	36.463	1.8038	27.61	1.8038	43.28	1.8038	91.835	1.8038	29.038	1.8038	128.979	1.8038	25.3	1.8038	55.2758	34.7104	0.37	0.23	0.06
1.8939	71.385	1.8939	28.891	1.8939	19.719	1.8939	28.4	1.8939	75.041	1.8939	23.856	1.8939	116.682	1.8939	37	1.8939	50.1217	32.0397	0.33	0.21	0.06
1.9841	59.342	1.9841	25.924	1.9841	21.332	1.9841	29.48	1.9841	70.238	1.9841	22.271	1.9841	92.823	1.9841	34.14	1.9841	44.4438	24.8161	0.3	0.17	0.05
2.0743	41.77	2.0743	22.944	2.0743	17.49	2.0743	18.04	2.0743	69.766	2.0743	19.792	2.0743	94.801	2.0743	28.84	2.0743	39.1804	26.6919	0.26	0.18	0.05
2.1645	50.906	2.1645	20.8	2.1645	19.123	2.1645	36.16	2.1645	73.204	2.1645	29.439	2.1645	101.072	2.1645	44.02	2.1645	46.8405	26.277	0.31	0.18	0.05
2.2547	57	2.2547	22.308	2.2547	19.584	2.2547	39.16	2.2547	80.291	2.2547	31.643	2.2547	98.762	2.2547	38.1	2.2547	48.356	26.4828	0.32	0.18	0.05
2.3449	57.23	2.3449	31.118	2.3449	10.355	2.3449	41.12	2.3449	76.416	2.3449	27.218	2.3449	90.878	2.3449	38.04	2.3449	46.5469	24.9872	0.31	0.17	0.05
2.4351	52.728	2.4351	35.909	2.4351	14.81	2.4351	27	2.4351	72.314	2.4351	31.826	2.4351	91.979	2.4351	31.7	2.4351	44.7833	24.1892	0.3	0.16	0.05
2.5253	55.708	2.5253	26.138	2.5253	10.201	2.5253	29.88	2.5253	86.687	2.5253	30.585	2.5253	90.238	2.5253	59	2.5253	48.5546	27.3793	0.32	0.18	0.05
2.6154	61.423	2.6154	27.63	2.6154	14.831	2.6154	32.28	2.6154	83.862	2.6154	25.295	2.6154	104.821	2.6154	58.12	2.6154	51.0328	29.5835	0.34	0.2	0.06
2.7056	52.957	2.7056	27.918	2.7056	16.462	2.7056	36.44	2.7056	77.781	2.7056	24.644	2.7056	102.509	2.7056	56.98	2.7056	49.4614	27.4393	0.33	0.18	0.05
2.7958	51.577	2.7958	25.723	2.7958	25.78	2.7958	36.28	2.7958	69.976	2.7958	30.191	2.7958	99.576	2.7958	64	2.7958	50.3879	24.5222	0.34	0.16	0.05
2.886	52.538	2.886	26.783	2.886	16.045	2.886	43.84	2.886	80.722	2.886	33.689	2.886	92.662	2.886	62.9	2.886	51.1474	24.8047	0.34	0.17	0.05
2.9762	54.096	2.9762	22.82	2.9762	20.921	2.9762	43.92	2.9762	75.736	2.9762	31.462	2.9762	86.69	2.9762	57.24	2.9762	49.1106	22.462	0.33	0.15	0.05
3.0664	57.89	3.0664	22.873	3.0664	14.328	3.0664	46.08	3.0664	64.026	3.0664	34.643	3.0664	89.962	3.0664	51.88	3.0664	47.7103	22.5752	0.32	0.15	0.05
3.1566	57.734	3.1566	24.038	3.1566	13.7	3.1566	54.12	3.1566	73.902	3.1566	43.45	3.1566	97.322	3.1566	55.88	3.1566	52.5183	24.7637	0.35	0.17	0.05
3.2468	49.781	3.2468	20.674	3.2468	11.285	3.2468	54.28	3.2468	87.344	3.2468	41.825	3.2468	108.953	3.2468	59.66	3.2468	54.2253	30.1343	0.36	0.2	0.06
3.3369	47.089	3.3369	20.252	3.3369	13.121	3.3369	49.6	3.3369	82.581	3.3369	50.531	3.3369	106.757	3.3369	66.84	3.3369	54.5964	28.8344	0.36	0.19	0.05
3.4271	53.161	3.4271	17.694	3.4271	13.866	3.4271	48	3.4271	81.326	3.4271	40.423	3.4271	122.791	3.4271	82.9	3.4271	57.5201	34.2142	0.38	0.23	0.06
3.5173	50.977	3.5173	17.873	3.5173	15.296	3.5173	41.88	3.5173	75.521	3.5173	53.035	3.5173	142.444	3.5173	74.6	3.5173	58.9532	37.871	0.39	0.25	0.06
3.6075	51.06	3.6075	17.124	3.6075	23.826	3.6075	58.72	3.6075	77.616	3.6075	58.407	3.6075	135.615	3.6075	57.24	3.6075	59.951	34.0341	0.4	0.23	0.06
3.6977	55.554	3.6977	17.636	3.6977	17.466	3.6977	51.68	3.6977	85.644	3.6977	50.696	3.6977	121.532	3.6977	49.9	3.6977	56.2635	32.042	0.37	0.21	0.06
3.7879	54.603	3.7879	20.117	3.7879	16.47	3.7879	50.12	3.7879	87.282	3.7879	40.83	3.7879	130.212	3.7879	47.54	3.7879	55.8967	34.7749	0.37	0.23	0.06
3.8781	49.989	3.8781	22.234	3.8781	18.277	3.8781	65.24	3.8781	78.71	3.8781	54.365	3.8781	133.853	3.8781	52.56	3.8781	59.4035	33.8809	0.4	0.23	0.06
3.9683	55.641	3.9683	22.389	3.9683	10.023	3.9683	61.48	3.9683	89.439	3.9683	45.414	3.9683	137.45	3.9683	51.44	3.9683	59.1595	37.2139	0.39	0.25	0.06
4.0584	55.294	4.0584	23.237	4.0584	23.826	4.0584	61.76	4.0584	97.597	4.0584	40.655	4.0584	167.73	4.0584	51.46	4.0584	65.1949	44.6317	0.43	0.3	0.07
4.1486	44.766	4.1486	30.285	4.1486	25.634	4.1486	71.48	4.1486	98.245	4.1486	44.5	4.1486	155.865	4.1486	47.1	4.1486	64.7344	40.786	0.43	0.27	0.07
4.2388	51.827	4.2388	24.872	4.2388	26.814	4.2388	62.76	4.2388	96.354	4.2388	50.055	4.2388	133.427	4.2388	46.6	4.2388	61.5886	34.2438	0.41	0.23	0.06
4.329	61.853	4.329	18.93	4.329	29.551	4.329	55.006	4.329	114.672	4.329	41.272	4.329	144.704	4.329	39.14	4.329	63.141	41.099	0.42	0.27	0.07
4.4192	67.156	4.4192	25.524	4.4192	17.043	4.4192	61.791	4.4192	117.967	4.4192	38.161	4.4192	169.906	4.4192	62.28	4.4192	69.9785	47.7145	0.47	0.32	0.07
4.5094	67.916	4.5094	27.646	4.5094	29.36	4.5094	61.623	4.5094	100.296	4.5094	34.841	4.5094	151.833	4.5094	39.58	4.5094	64.1369	40.3438	0.43	0.27	0.06
4.5996	77.15	4.5996	26.243	4.5996	29.142	4.5996	61.351	4.5996	109.737	4.5996	41.96	4.5996	129.991	4.5996	35.234	4.5996	63.851	36.3668	0.43	0.24	0.06
4.6898	78.199	4.6898	26.543	4.6898	19.061	4.6898	61.274	4.6898	114.648	4.6898	35.182	4.6898	152.455	4.6898	47.012	4.6898	66.7968	43.4131	0.45	0.29	0.07
4.7799	70.267	4.7799	24.589	4.7799	23.957	4.7799	62.928	4.7799	106.977	4.7799	34.569	4.7799	167.908	4.7799	45.969	4.7799	67.1455	46.0341	0.45	0.31	0.07
4.8701	74.669	4.8701	25.57	4.8701	26.613	4.8701	50.919	4.8701	135.635	4.8701	41.303	4.8701	193.628	4.8701	35.605	4.8701	72.9928	56.755	0.49	0.38	0.08
4.9603	73.452	4.9603	28.564	4.9603	26.302	4.9603	49.867	4.9603	125.896	4.9603	35.802	4.9603	195.816	4.9603	44.274	4.9603	72.4966	55.6543	0.48	0.37	0.08
5.0505	71.942	5.0505	34.9	5.0505	23.777	5.0505	46.106	5.0505	131.207	5.0505	40.367	5.0505	219.558	5.0505	37.767	5.0505	75.703	62.9623	0.5	0.42	0.08
5.1407	75.108	5.1407	35.733	5.1407	18.829	5.1407	47.27	5.1407	141.315	5.1407	33.699	5.1407	227.788	5.1407	56.203	5.1407	79.4931	66.2434	0.53	0.44	0.08
5.2309	76.372	5.2309	46.498	5.2309	33.463	5.2309	45.401	5.2309	138.188	5.2309	33.733	5.2309	185.311	5.2309	51.759	5.2309	76.3406	52.2083	0.51	0.35	0.07
5.3211	92.889	5.3211	56.088	5.3211	43.714	5.3211	46.135	5.3211	120.621	5.3211	27.222	5.3211	218.897	5.3211	54.552	5.3211	82.5148	58.6583	0.55	0.39	0.08
5.4113	88.692	5.4113	49.666	5.4113	33.503	5.4113	42.785	5.4113	106.655	5.4113	34.763	5.4113	197.111	5.4113	49.864	5.4113	75.3799	52.1439	0.5	0.35	0.07
5.5014	89.55	5.5014	65.811	5.5014	27.223	5.5014	42.216	5.5014	88.184	5.5014	48.798	5.5014	198.377	5.5014	43.214	5.5014	75.4216	50.9224	0.5	0.34	0.07
5.5916	89.89	5.5916	63.054	5.5916	24.202	5.5916	38.568	5.5916	74.697	5.5916	44.245	5.5916	190.67	5.5916	42.135	5.5916	70.9326	49.4285	0.47	0.33	0.07
5.6818	83.168	5.6818	49.904	5.6818	27.806	5.6818	48.018	5.6818	70.949	5.6818	40.98	5.6818	175.05	5.6818	46.607	5.6818	67.8102	43.6294	0.45	0.29	0.07
5.772	83.793	5.772	40.235	5.772	39.668	5.772	29.615	5.772	73.1	5.772	70.274	5.772	184.308	5.772	48.606	5.772	71.1999	46.2998	0.47	0.31	0.07
5.8622	98.865	5.8622	51.242	5.8622	31.394	5.8622	43.062	5.8622	89.605	5.8622	82.038	5.8622	192.268	5.8622	45.327	5.8622	79.2251	48.4868	0.53	0.32	0.07
5.9524	103.226	5.9524	52.642	5.9524	25.473	5.9524	37.373	5.9524	83.186	5.9524	90.685	5.9524	202.615	5.9524	41.814	5.9524	79.6268	53.2611	0.53	0.35	0.07
6.0426	96.482	6.0426	50.622	6.0426	33.55	6.0426	40.388	6.0426	66.322	6.0426	104.235	6.0426	182.248	6.0426	48.799	6.0426	77.8307	46.1335	0.52	0.31	0.07
6.1328	105.553	6.1328	42.467	6.1328	30.902	6.1328	43.935	6.1328	77.263	6.1328	96.19	6.1328	149.265	6.1328	49.416	6.1328	74.3739	37.9513	0.5	0.25	0.06
6.2229	96.928	6.2229	40.583	6.2229	20.824	6.2229	53.437	6.2229	77.558	6.2229	94.643	6.2229	140.925	6.2229	49.629	6.2229	71.8159	35.9973	0.48	0.24	0.06
6.3131	102.256	6.3131	56.956	6.3131	21.334	6.3131	40.906	6.3131	66.285	6.3131	85.211	6.3131	124.348	6.3131	47.271	6.3131	68.0709	31.8417	0.45	0.21	0.06
6.4033	64.851	6.4033	57.6	6.4033	24.697	6.4033	53.854	6.4033	83.939	6.4033	116.447	6.4033	115.944	6.4033	30.692	6.4033	68.503	32.5634	0.46	0.22	0.06
6.4935	55.152	6.4935	47.666	6.4935	22.148	6.4935	63.732	6.4935	66.55	6.4935	103.128	6.4935	113.559	6.4935	26.744	6.4935	62.3349	30.529	0.42	0.2	0.06
6.5837	34.987	6.5837	36.393	6.5837	17.415	6.5837	68.73	6.5837	67.968	6.5837	83.866	6.5837	110.233	6.5837	37.452	6.5837	57.1305	28.8782	0.38	0.19	0.05
6.6739	27.859	6.6739	39.632	6.6739	20.244	6.6739	73.202	6.6739	82.58	6.6739	87.928	6.6739	133.936	6.6739	35.805	6.6739	62.6482	36.2084	0.42	0.24	0.06
6.7641	37.52	6.7641	24.18	6.7641	19.987	6.7641	82.422	6.7641	51.726	6.7641	94.412	6.7641	130.272	6.7641	37.554	6.7641	59.7591	36.3771	0.4	0.24	0.06
6.8543	35.811	6.8543	25.611	6.8543	15.66	6.8543	79.873	6.8543	64.148	6.8543	89.133	6.8543	118.949	6.8543	40.312	6.8543	58.6871	33.248	0.39	0.22	0.06
6.9444	23.904	6.9444	15.754	6.9444	17.632	6.9444	73.901	6.9444	85.035	6.9444	47.463	6.9444	134.772	6.9444	52.13	6.9444	56.3239	38.042	0.38	0.25	0.06
7.0346	41.794	7.0346	33.865	7.0346	25.668	7.0346	72.726	7.0346	80.059	7.0346	81.342	7.0346	136.798	7.0346	46.057	7.0346	64.7886	33.7673	0.43	0.23	0.06
7.1248	29.842	7.1248	31.079	7.1248	24.919	7.1248	77.342	7.1248	69.387	7.1248	75.647	7.1248	112.337	7.1248	49.586	7.1248	58.7674	28.3852	0.39	0.19	0.05
7.215	36.882	7.215	38.225	7.215	22.815	7.215	81.877	7.215	79.018	7.215	100.241	7.215	106.996	7.215	56.336	7.215	65.2987	29.2583	0.44	0.19	0.06
7.3052	33.453	7.3052	28.64	7.3052	18.538	7.3052	87.313	7.3052	77.62	7.3052	96.465	7.3052	111.081	7.3052	55.447	7.3052	63.5696	32.252	0.42	0.21	0.06
7.3954	35.069	7.3954	21.332	7.3954	26.031	7.3954	87.194	7.3954	63.762	7.3954	88.852	7.3954	98.2	7.3954	69.084	7.3954	61.1905	28.2559	0.41	0.19	0.05
7.4856	35.161	7.4856	35.89	7.4856	31.123	7.4856	85.659	7.4856	75.226	7.4856	93.804	7.4856	113.252	7.4856	87.688	7.4856	69.7254	29.3914	0.46	0.2	0.06
7.5758	49.58	7.5758	55.104	7.5758	35.218	7.5758	90.303	7.5758	94.775	7.5758	105.55	7.5758	145.36	7.5758	82.865	7.5758	82.3444	33.0984	0.55	0.22	0.06
7.6659	44.01	7.6659	50.843	7.6659	30.803	7.6659	90.246	7.6659	133.201	7.6659	105.749	7.6659	180.472	7.6659	68.551	7.6659	87.9844	47.2755	0.59	0.32	0.07
7.7561	49.188	7.7561	46.397	7.7561	46.503	7.7561	80.612	7.7561	89.505	7.7561	92.745	7.7561	189.216	7.7561	68.458	7.7561	82.828	43.9476	0.55	0.29	0.07
7.8463	51.774	7.8463	52.709	7.8463	39.729	7.8463	69.455	7.8463	94.964	7.8463	83.16	7.8463	197.411	7.8463	71.93	7.8463	82.6415	46.5067	0.55	0.31	0.07
7.9365	55.078	7.9365	74.574	7.9365	46.985	7.9365	77.383	7.9365	71.024	7.9365	89.041	7.9365	208.529	7.9365	60.696	7.9365	85.4137	48.1762	0.57	0.32	0.07
8.0267	66.529	8.0267	94.517	8.0267	54.672	8.0267	80.128	8.0267	79.734	8.0267	88.651	8.0267	225.401	8.0267	65.225	8.0267	94.3571	51.0139	0.63	0.34	0.07
8.1169	64.336	8.1169	110.838	8.1169	53.399	8.1169	88.508	8.1169	89.786	8.1169	81.138	8.1169	220.035	8.1169	70.161	8.1169	97.2751	49.2349	0.65	0.33	0.07
8.2071	72.585	8.2071	95.171	8.2071	69.662	8.2071	91.863	8.2071	108.311	8.2071	76.455	8.2071	229.171	8.2071	69.212	8.2071	101.554	49.9984	0.68	0.33	0.07
8.2973	85.005	8.2973	96.307	8.2973	53.104	8.2973	80.227	8.2973	124.401	8.2973	78.14	8.2973	239.997	8.2973	71.223	8.2973	103.55	55.0323	0.69	0.37	0.08
8.3874	113.372	8.3874	116.001	8.3874	58.158	8.3874	73.568	8.3874	128.322	8.3874	86.784	8.3874	240.664	8.3874	63.293	8.3874	110.02	54.9904	0.73	0.37	0.08
8.4776	138.72	8.4776	116.693	8.4776	63.068	8.4776	72.568	8.4776	123.805	8.4776	90.772	8.4776	237.952	8.4776	54.451	8.4776	112.254	55.2839	0.75	0.37	0.08
8.5678	125.698	8.5678	115.243	8.5678	58.209	8.5678	76.903	8.5678	149.871	8.5678	79.87	8.5678	235.934	8.5678	64.773	8.5678	113.313	55.1886	0.76	0.37	0.08
8.658	135.805	8.658	111.245	8.658	52.346	8.658	87.843	8.658	170.911	8.658	89.775	8.658	231.993	8.658	66.543	8.658	118.308	55.7004	0.79	0.37	0.08
8.7482	129.456	8.7482	101.442	8.7482	59.163	8.7482	107.364	8.7482	154.393	8.7482	98.013	8.7482	235.606	8.7482	69.117	8.7482	119.319	52.3343	0.8	0.35	0.07
8.8384	118.322	8.8384	112.448	8.8384	49.864	8.8384	81.432	8.8384	145.09	8.8384	95.945	8.8384	232.863	8.8384	72.003	8.8384	113.496	52.8889	0.76	0.35	0.07
8.9286	130.2	8.9286	105.316	8.9286	50.78	8.9286	87.503	8.9286	152.902	8.9286	112.74	8.9286	239.587	8.9286	68.472	8.9286	118.438	55.0443	0.79	0.37	0.08
9.0188	129.07	9.0188	104.525	9.0188	57.941	9.0188	98.521	9.0188	146.798	9.0188	96.895	9.0188	234.512	9.0188	72.127	9.0188	117.549	51.5305	0.78	0.34	0.07
9.1089	115.506	9.1089	82.47	9.1089	71.574	9.1089	120.014	9.1089	142.262	9.1089	90.949	9.1089	236.905	9.1089	83.51	9.1089	117.899	50.0953	0.79	0.33	0.07
9.1991	102.874	9.1991	77.639	9.1991	61.213	9.1991	114.93	9.1991	152.716	9.1991	107.575	9.1991	237.24	9.1991	99.261	9.1991	119.181	51.1909	0.79	0.34	0.07
9.2893	108.519	9.2893	81.058	9.2893	53.068	9.2893	102.483	9.2893	163.907	9.2893	125.645	9.2893	212.694	9.2893	110.164	9.2893	119.692	46.21	0.8	0.31	0.07
9.3795	126.286	9.3795	90.199	9.3795	58.379	9.3795	96.02	9.3795	164.776	9.3795	111.281	9.3795	225.565	9.3795	113.227	9.3795	123.217	48.0726	0.82	0.32	0.07
9.4697	121.006	9.4697	54.235	9.4697	43.049	9.4697	90.843	9.4697	162.73	9.4697	117.102	9.4697	238.663	9.4697	110.31	9.4697	117.242	58.1441	0.78	0.39	0.08
9.5599	125.465	9.5599	41.516	9.5599	47.926	9.5599	79.541	9.5599	185.238	9.5599	107.874	9.5599	238.795	9.5599	127.221	9.5599	119.197	62.8326	0.79	0.42	0.08
9.6501	143.335	9.6501	72.403	9.6501	39.194	9.6501	92.7	9.6501	200.507	9.6501	116.838	9.6501	250.782	9.6501	114.163	9.6501	128.74	64.3265	0.86	0.43	0.08
9.7403	171.7	9.7403	86.236	9.7403	50.264	9.7403	111.757	9.7403	212.813	9.7403	100.223	9.7403	240.546	9.7403	104.536	9.7403	134.759	62.0253	0.9	0.41	0.08
9.8304	165.603	9.8304	80.852	9.8304	42.574	9.8304	116.624	9.8304	199.789	9.8304	95.401	9.8304	240.418	9.8304	119.683	9.8304	132.618	61.0498	0.88	0.41	0.08
9.9206	165.195	9.9206	73.92	9.9206	36.354	9.9206	120.277	9.9206	174.875	9.9206	86.305	9.9206	253.775	9.9206	119.153	9.9206	128.732	63.8316	0.86	0.43	0.08
10.0108	150.046	10.0108	68.628	10.0108	59.96	10.0108	93.292	10.0108	166.967	10.0108	105.9	10.0108	254.36	10.0108	135.264	10.0108	129.302	59.0106	0.86	0.39	0.08
10.101	128.975	10.101	66.851	10.101	60.381	10.101	102.118	10.101	189.584	10.101	98.655	10.101	225	10.101	112.64	10.101	123.025	53.7157	0.82	0.36	0.07
10.1912	127.721	10.1912	79.894	10.1912	58.776	10.1912	107.03	10.1912	184.315	10.1912	109.822	10.1912	244.798	10.1912	119.133	10.1912	128.936	55.634	0.86	0.37	0.08
10.2814	124.504	10.2814	88.319	10.2814	74.63	10.2814	84.062	10.2814	203.977	10.2814	98.866	10.2814	245.659	10.2814	118.918	10.2814	129.867	57.9712	0.87	0.39	0.08
10.3716	146.565	10.3716	114.064	10.3716	45.518	10.3716	82.273	10.3716	242.167	10.3716	102.974	10.3716	223.11	10.3716	128.159	10.3716	135.604	62.9255	0.9	0.42	0.08
10.4618	131.776	10.4618	92.409	10.4618	57.838	10.4618	59.223	10.4618	210.398	10.4618	93.374	10.4618	216.5	10.4618	117.816	10.4618	122.417	57.6725	0.82	0.38	0.08
10.5519	122.606	10.5519	90.115	10.5519	46.347	10.5519	59.646	10.5519	232.772	10.5519	98.301	10.5519	227.96	10.5519	111.772	10.5519	123.69	65.9259	0.82	0.44	0.08
10.6421	165.19	10.6421	90.828	10.6421	54.993	10.6421	52.084	10.6421	221.04	10.6421	87.594	10.6421	210.06	10.6421	149.221	10.6421	128.876	62.5752	0.86	0.42	0.08
10.7323	165.851	10.7323	74.14	10.7323	45.743	10.7323	62.784	10.7323	200.513	10.7323	98.588	10.7323	211.35	10.7323	143.984	10.7323	125.369	59.8158	0.84	0.4	0.08
10.8225	191.079	10.8225	95.912	10.8225	55.594	10.8225	54.495	10.8225	210.658	10.8225	99.956	10.8225	221.99	10.8225	127.957	10.8225	132.205	63.2116	0.88	0.42	0.08
10.9127	179.291	10.9127	105.371	10.9127	45.492	10.9127	63.068	10.9127	222.081	10.9127	91.397	10.9127	233.35	10.9127	133.59	10.9127	134.205	66.3131	0.89	0.44	0.08
11.0029	163.231	11.0029	94.753	11.0029	47.148	11.0029	57.921	11.0029	177.521	11.0029	90.944	11.0029	244.93	11.0029	146.157	11.0029	127.826	62.8711	0.85	0.42	0.08
11.0931	169.196	11.0931	98.374	11.0931	39.258	11.0931	82.77	11.0931	222.734	11.0931	90.35	11.0931	250.77	11.0931	129.658	11.0931	135.389	68.4893	0.9	0.46	0.08
11.1833	169.564	11.1833	113.426	11.1833	33.496	11.1833	72.101	11.1833	230.471	11.1833	90.246	11.1833	238.95	11.1833	157.344	11.1833	138.2	69.1557	0.92	0.46	0.08
11.2734	180.763	11.2734	115.027	11.2734	51.012	11.2734	68.259	11.2734	218.396	11.2734	84.821	11.2734	241.81	11.2734	132.574	11.2734	136.583	66.0195	0.91	0.44	0.08
11.3636	180.872	11.3636	97.643	11.3636	43.975	11.3636	77.958	11.3636	215.372	11.3636	82.049	11.3636	249.77	11.3636	137.877	11.3636	135.69	68.4463	0.9	0.46	0.08
11.4538	182.622	11.4538	98.622	11.4538	49.911	11.4538	76.933	11.4538	163.207	11.4538	88.847	11.4538	244.06	11.4538	126.056	11.4538	128.782	59.9934	0.86	0.4	0.08
11.544	185.831	11.544	93.676	11.544	60.913	11.544	113.649	11.544	180.448	11.544	65.961	11.544	242.53	11.544	129.742	11.544	134.094	59.8455	0.89	0.4	0.08
11.6342	168.057	11.6342	89.278	11.6342	65.96	11.6342	110.515	11.6342	200.991	11.6342	74.53	11.6342	244.82	11.6342	131.554	11.6342	135.713	59.8216	0.9	0.4	0.08
11.7244	183.152	11.7244	86.079	11.7244	68.88	11.7244	93.762	11.7244	235.136	11.7244	73.113	11.7244	244.71	11.7244	145.687	11.7244	141.315	67.5213	0.94	0.45	0.08
11.8146	197.587	11.8146	112.709	11.8146	57.138	11.8146	90.581	11.8146	223.313	11.8146	76.688	11.8146	232.07	11.8146	125.575	11.8146	139.458	64.2276	0.93	0.43	0.08
11.9048	176.503	11.9048	123.638	11.9048	53.121	11.9048	75.838	11.9048	219.46	11.9048	77.569	11.9048	234.22	11.9048	126.073	11.9048	135.803	63.6463	0.9	0.42	0.08
11.9949	158.388	11.9949	89.271	11.9949	57.291	11.9949	60.681	11.9949	226.346	11.9949	84.602	11.9949	239.07	11.9949	125.013	11.9949	130.083	66.9151	0.87	0.45	0.08
12.0851	180.398	12.0851	96.872	12.0851	45.749	12.0851	56.503	12.0851	233.208	12.0851	69.305	12.0851	227.59	12.0851	133.136	12.0851	130.345	70.7159	0.87	0.47	0.09
12.1753	145.124	12.1753	91.73	12.1753	51.738	12.1753	73.046	12.1753	223.872	12.1753	68.569	12.1753	236.34	12.1753	121.797	12.1753	126.527	66.0745	0.84	0.44	0.08
12.2655	167.492	12.2655	84.795	12.2655	62.519	12.2655	73.543	12.2655	199.739	12.2655	77.749	12.2655	242.83	12.2655	93.333	12.2655	125.25	63.9125	0.83	0.43	0.08
12.3557	171.311	12.3557	89.812	12.3557	48.796	12.3557	58.42	12.3557	226.541	12.3557	80.587	12.3557	237.47	12.3557	135.301	12.3557	131.03	69.2556	0.87	0.46	0.08
12.4459	175.015	12.4459	88.368	12.4459	64.287	12.4459	71.069	12.4459	220.734	12.4459	78.747	12.4459	232.83	12.4459	142.714	12.4459	134.22	64.2294	0.89	0.43	0.08
12.5361	176.419	12.5361	101.673	12.5361	65.985	12.5361	88.129	12.5361	225.813	12.5361	85.48	12.5361	221.36	12.5361	152.66	12.5361	139.69	59.2446	0.93	0.39	0.08
12.6263	170.32	12.6263	102.448	12.6263	90.861	12.6263	81.664	12.6263	230.614	12.6263	96.642	12.6263	207.48	12.6263	120.001	12.6263	137.504	53.7839	0.92	0.36	0.07
12.7164	162.499	12.7164	97.629	12.7164	68.43	12.7164	71.805	12.7164	211.133	12.7164	92.912	12.7164	219.21	12.7164	146.966	12.7164	133.823	56.3128	0.89	0.38	0.08
12.8066	168.862	12.8066	97.283	12.8066	56.46	12.8066	70.715	12.8066	210.751	12.8066	104.102	12.8066	243.88	12.8066	136.479	12.8066	136.066	62.6609	0.91	0.42	0.08
12.8968	188.365	12.8968	100.982	12.8968	62.3	12.8968	86.494	12.8968	208.54	12.8968	71.967	12.8968	231.43	12.8968	166.145	12.8968	139.528	62.3791	0.93	0.42	0.08
12.987	218.695	12.987	84.105	12.987	61.99	12.987	83.578	12.987	238.063	12.987	85.575	12.987	216.88	12.987	165.536	12.987	144.303	68.5375	0.96	0.46	0.08
13.0772	208.234	13.0772	105.976	13.0772	58.411	13.0772	66.766	13.0772	231.724	13.0772	65.283	13.0772	225.58	13.0772	147.357	13.0772	138.666	69.994	0.92	0.47	0.09
13.1674	188.354	13.1674	112.449	13.1674	55.898	13.1674	85.771	13.1674	222.584	13.1674	45.664	13.1674	238.17	13.1674	142.856	13.1674	136.468	69.2606	0.91	0.46	0.08
13.2576	200.56	13.2576	102.276	13.2576	81.994	13.2576	81.647	13.2576	188.088	13.2576	59.987	13.2576	249.17	13.2576	146.359	13.2576	138.76	63.7585	0.92	0.42	0.08
13.3478	187.711	13.3478	80.311	13.3478	102.104	13.3478	84.206	13.3478	211.631	13.3478	64.395	13.3478	255	13.3478	174.121	13.3478	144.935	66.5486	0.97	0.44	0.08
13.438	174.932	13.438	85.056	13.438	113.989	13.438	112.189	13.438	194.945	13.438	72.561	13.438	255	13.438	147.981	13.438	144.582	57.4204	0.96	0.38	0.08
13.5281	196.839	13.5281	86.605	13.5281	108.414	13.5281	100.111	13.5281	208.15	13.5281	62.714	13.5281	251.24	13.5281	133.085	13.5281	143.395	62.8669	0.96	0.42	0.08
13.6183	187.437	13.6183	90.738	13.6183	99.508	13.6183	86.116	13.6183	226.923	13.6183	78.462	13.6183	250.76	13.6183	175.513	13.6183	149.432	64.5948	1	0.43	0.08
13.7085	212.076	13.7085	90.663	13.7085	86.55	13.7085	93.234	13.7085	226.286	13.7085	71.424	13.7085	255	13.7085	165.322	13.7085	150.069	68.8078	1	0.46	0.08
13.7987	144.969	13.7987	103.379	13.7987	91.797	13.7987	85.866	13.7987	233.487	13.7987	71.566	13.7987	255	13.7987	171.678	13.7987	144.718	65.2814	0.96	0.44	0.08
13.8889	156	13.8889	106.477	13.8889	91.68	13.8889	86.935	13.8889	228.858	13.8889	67.393	13.8889	255	13.8889	181.534	13.8889	146.735	65.4649	0.98	0.44	0.08
13.9791	170.798	13.9791	97.334	13.9791	81.718	13.9791	94.117	13.9791	225.955	13.9791	74.929	13.9791	255	13.9791	182.371	13.9791	147.778	65.6028	0.98	0.44	0.08
14.0693	155.541	14.0693	93.459	14.0693	101.318	14.0693	88.649	14.0693	209.764	14.0693	68.021	14.0693	236.2	14.0693	183.414	14.0693	142.046	58.8372	0.95	0.39	0.08
14.1595	137.854	14.1595	94.312	14.1595	106.003	14.1595	91.478	14.1595	210.876	14.1595	55.901	14.1595	210.77	14.1595	183.436	14.1595	136.329	55.3235	0.91	0.37	0.08
14.2496	184.583	14.2496	103.339	14.2496	104.871	14.2496	85.775	14.2496	206.69	14.2496	52.423	14.2496	213.99	14.2496	185.997	14.2496	142.208	58.2823	0.95	0.39	0.08
14.3398	138.103	14.3398	91.517	14.3398	95.519	14.3398	69.944	14.3398	192.837	14.3398	51.066	14.3398	218.3	14.3398	175.984	14.3398	129.159	57.4751	0.86	0.38	0.08
14.43	164.247	14.43	83.536	14.43	109.212	14.43	59.877	14.43	185.57	14.43	48.804	14.43	206.89	14.43	181.342	14.43	129.935	57.9978	0.87	0.39	0.08
14.5202	127.421	14.5202	104.425	14.5202	99.225	14.5202	59.327	14.5202	187.363	14.5202	60.627	14.5202	211.75	14.5202	179.539	14.5202	128.71	54.5773	0.86	0.36	0.08
14.6104	135.771	14.6104	111.101	14.6104	99.079	14.6104	70.309	14.6104	173.579	14.6104	63.551	14.6104	207.61	14.6104	160.593	14.6104	127.699	47.6197	0.85	0.32	0.07
14.7006	133.025	14.7006	99.54	14.7006	101.488	14.7006	76.479	14.7006	176.115	14.7006	62.046	14.7006	198.81	14.7006	160.509	14.7006	126.001	45.9571	0.84	0.31	0.07
14.7908	153.933	14.7908	90.034	14.7908	115.239	14.7908	75.023	14.7908	196.833	14.7908	65.648	14.7908	222.28	14.7908	159.689	14.7908	134.835	53.8845	0.9	0.36	0.07
14.881	164.41	14.881	99.003	14.881	132.476	14.881	82.55	14.881	178.954	14.881	65.736	14.881	230.3	14.881	171.407	14.881	140.605	52.2061	0.94	0.35	0.07
14.9711	149.518	14.9711	92.693	14.9711	117.165	14.9711	65.653	14.9711	199.199	14.9711	70.462	14.9711	234.4	14.9711	184.543	14.9711	139.204	58.7451	0.93	0.39	0.08
15.0613	136.61	15.0613	83.951	15.0613	114.883	15.0613	65.017	15.0613	188.896	15.0613	59.149	15.0613	246.41	15.0613	176.403	15.0613	133.915	61.9335	0.89	0.41	0.08
15.1515	140.821	15.1515	90.998	15.1515	101.989	15.1515	70.028	15.1515	149.94	15.1515	58.869	15.1515	230.61	15.1515	150.069	15.1515	124.165	52.1171	0.83	0.35	0.07
15.2417	173.39	15.2417	102.756	15.2417	109.041	15.2417	65.92	15.2417	188.887	15.2417	70.311	15.2417	219.46	15.2417	132.904	15.2417	132.834	52.6168	0.89	0.35	0.07
15.3319	125.218	15.3319	116.471	15.3319	102.045	15.3319	83.484	15.3319	174.221	15.3319	75.498	15.3319	233.23	15.3319	156.155	15.3319	133.29	49.1566	0.89	0.33	0.07
15.4221	165.58	15.4221	114.322	15.4221	105.04	15.4221	74.306	15.4221	197.238	15.4221	70.461	15.4221	222.96	15.4221	172.006	15.4221	140.239	53.467	0.93	0.36	0.07
15.5123	133.948	15.5123	124.595	15.5123	95.913	15.5123	76.239	15.5123	216.931	15.5123	68.917	15.5123	220.1	15.5123	159.29	15.5123	136.992	54.738	0.91	0.36	0.08
15.6025	162.115	15.6025	124.147	15.6025	93.344	15.6025	77.979	15.6025	192.384	15.6025	77.397	15.6025	226.13	15.6025	147.066	15.6025	137.57	51.0491	0.92	0.34	0.07
15.6926	133.178	15.6926	106.839	15.6926	108.409	15.6926	76.312	15.6926	182.967	15.6926	73.317	15.6926	212.18	15.6926	140.359	15.6926	129.195	45.7838	0.86	0.31	0.07
15.7828	148.88	15.7828	99.089	15.7828	114.226	15.7828	80.382	15.7828	186.984	15.7828	70.358	15.7828	214.17	15.7828	133.014	15.7828	130.888	47.3213	0.87	0.32	0.07
15.873	146.735	15.873	91.454	15.873	99.027	15.873	72.553	15.873	230.527	15.873	70.678	15.873	222.35	15.873	133.524	15.873	133.356	59.2674	0.89	0.39	0.08
15.9632	150.963	15.9632	123.683	15.9632	98.422	15.9632	74.858	15.9632	177.042	15.9632	76.442	15.9632	227.82	15.9632	119.375	15.9632	131.076	49.0802	0.87	0.33	0.07
16.0534	127.119	16.0534	79.934	16.0534	93.915	16.0534	65.498	16.0534	202.214	16.0534	79.361	16.0534	223.48	16.0534	97.272	16.0534	121.099	55.8262	0.81	0.37	0.08
16.1436	110.314	16.1436	92.916	16.1436	92.839	16.1436	62.051	16.1436	171.873	16.1436	63.508	16.1436	216.88	16.1436	103.563	16.1436	114.243	50.2445	0.76	0.33	0.07
16.2338	152.519	16.2338	102.183	16.2338	105.144	16.2338	71.057	16.2338	190.261	16.2338	57.478	16.2338	218.53	16.2338	106.767	16.2338	125.492	53.0078	0.84	0.35	0.07
16.324	138.442	16.324	109.07	16.324	98.449	16.324	70.861	16.324	178.062	16.324	54.025	16.324	202.02	16.324	76.284	16.324	115.902	49.4552	0.77	0.33	0.07
16.4141	128.082	16.4141	106.622	16.4141	87.914	16.4141	71.486	16.4141	172.71	16.4141	54.209	16.4141	197.63	16.4141	83.226	16.4141	112.735	47.0249	0.75	0.31	0.07
16.5043	153.731	16.5043	100.328	16.5043	114.526	16.5043	54.404	16.5043	208.677	16.5043	50.071	16.5043	200.31	16.5043	92.895	16.5043	121.868	56.7535	0.81	0.38	0.08
16.5945	149.692	16.5945	108.392	16.5945	95.554	16.5945	59.124	16.5945	210.335	16.5945	51.427	16.5945	192.11	16.5945	91.617	16.5945	119.781	54.9859	0.8	0.37	0.08
16.6847	141.735	16.6847	119.754	16.6847	97.72	16.6847	90.808	16.6847	219.638	16.6847	61.021	16.6847	198.578	16.6847	91.517	16.6847	127.596	52.1434	0.85	0.35	0.07
16.7749	143.66	16.7749	93.482	16.7749	94.622	16.7749	63.98	16.7749	215.65	16.7749	61.349	16.7749	201.376	16.7749	92.161	16.7749	120.785	55.9311	0.8	0.37	0.08
16.8651	144.908	16.8651	89.759	16.8651	70.474	16.8651	56.069	16.8651	225.549	16.8651	52.829	16.8651	198.179	16.8651	84.246	16.8651	115.252	62.1866	0.77	0.41	0.08
16.9553	198.291	16.9553	80.864	16.9553	79.633	16.9553	55.863	16.9553	219.171	16.9553	46.466	16.9553	196.478	16.9553	100.834	16.9553	122.2	65.9771	0.81	0.44	0.08
17.0455	138.966	17.0455	98.168	17.0455	80.725	17.0455	51.573	17.0455	228.035	17.0455	52.788	17.0455	214.213	17.0455	92.407	17.0455	119.609	64.1155	0.8	0.43	0.08
17.1356	156.947	17.1356	89.6	17.1356	87.571	17.1356	67.472	17.1356	212.509	17.1356	56.679	17.1356	165.443	17.1356	83.197	17.1356	114.927	52.2987	0.77	0.35	0.07
17.2258	122.504	17.2258	79.104	17.2258	99.166	17.2258	64.192	17.2258	246.683	17.2258	57.555	17.2258	171.447	17.2258	93.307	17.2258	116.745	59.6341	0.78	0.4	0.08
17.316	125.932	17.316	73.613	17.316	92.144	17.316	79.498	17.316	224.546	17.316	58.012	17.316	161.51	17.316	103.663	17.316	114.865	51.4231	0.77	0.34	0.07
17.4062	143.042	17.4062	81.541	17.4062	86.851	17.4062	67.182	17.4062	214.507	17.4062	52.884	17.4062	141.19	17.4062	100.27	17.4062	110.933	49.3906	0.74	0.33	0.07
17.4964	127.041	17.4964	74.536	17.4964	89.998	17.4964	65.356	17.4964	180.477	17.4964	47.543	17.4964	135.97	17.4964	82.718	17.4964	100.455	41.0777	0.67	0.27	0.07
17.5866	103.444	17.5866	66.132	17.5866	85.451	17.5866	62.75	17.5866	177.114	17.5866	48.008	17.5866	165.01	17.5866	60.509	17.5866	96.0523	46.1912	0.64	0.31	0.07
17.6768	126.826	17.6768	68.576	17.6768	94.969	17.6768	66.127	17.6768	197.099	17.6768	53.047	17.6768	161.21	17.6768	61.092	17.6768	103.618	49.5837	0.69	0.33	0.07
17.767	130.063	17.767	81.204	17.767	84.232	17.767	55.755	17.767	201.698	17.767	53.498	17.767	221.75	17.767	51.747	17.767	109.993	63.5617	0.73	0.42	0.08
17.8571	128.218	17.8571	69.698	17.8571	67.528	17.8571	68.192	17.8571	193.33	17.8571	51.812	17.8571	198.28	17.8571	51.684	17.8571	103.593	57.7747	0.69	0.38	0.08
17.9473	156.826	17.9473	79.41	17.9473	87.492	17.9473	79.272	17.9473	195.922	17.9473	47.497	17.9473	193.07	17.9473	46.442	17.9473	110.741	57.8838	0.74	0.39	0.08
18.0375	153.022	18.0375	90.176	18.0375	75.687	18.0375	60.124	18.0375	160.191	18.0375	41.17	18.0375	216.88	18.0375	38.57	18.0375	104.478	60.6704	0.7	0.4	0.08
18.1277	163.957	18.1277	88.967	18.1277	66.974	18.1277	62.892	18.1277	132.753	18.1277	52.046	18.1277	244.92	18.1277	48.482	18.1277	107.624	64.4624	0.72	0.43	0.08
18.2179	121.654	18.2179	84.523	18.2179	63.249	18.2179	73.091	18.2179	139.997	18.2179	59.598	18.2179	232.47	18.2179	57.494	18.2179	104.01	56.1713	0.69	0.37	0.08
18.3081	135.086	18.3081	93.99	18.3081	60.026	18.3081	79.221	18.3081	113.223	18.3081	67.423	18.3081	216.73	18.3081	62.697	18.3081	103.549	49.3071	0.69	0.33	0.07
18.3983	125.54	18.3983	81.856	18.3983	70.848	18.3983	76.291	18.3983	100.029	18.3983	66.711	18.3983	214.81	18.3983	56.686	18.3983	99.0964	48.1567	0.66	0.32	0.07
18.4885	156.009	18.4885	88.922	18.4885	59.927	18.4885	65.678	18.4885	124.249	18.4885	66.139	18.4885	222.1	18.4885	62.992	18.4885	105.752	54.5338	0.7	0.36	0.08
18.5786	141.838	18.5786	97.102	18.5786	47.552	18.5786	65.281	18.5786	120.797	18.5786	60.193	18.5786	213.9	18.5786	50.097	18.5786	99.595	53.8451	0.66	0.36	0.07
18.6688	147.837	18.6688	92.378	18.6688	52.881	18.6688	57.744	18.6688	139.27	18.6688	54.986	18.6688	221.92	18.6688	55.089	18.6688	102.763	57.8155	0.68	0.39	0.08
18.759	140.457	18.759	84.756	18.759	30.692	18.759	68.81	18.759	143.252	18.759	52.275	18.759	212.62	18.759	64.755	18.759	99.7021	56.6996	0.66	0.38	0.08
18.8492	144.72	18.8492	83.353	18.8492	21.818	18.8492	85.594	18.8492	173.666	18.8492	57.877	18.8492	231.34	18.8492	61.075	18.8492	107.43	65.3085	0.72	0.44	0.08
18.9394	165.93	18.9394	76.736	18.9394	28.633	18.9394	72.297	18.9394	142.608	18.9394	63.424	18.9394	247.98	18.9394	45.843	18.9394	105.431	69.3695	0.7	0.46	0.08
19.0296	158.844	19.0296	75.827	19.0296	52.963	19.0296	66.368	19.0296	163.83	19.0296	66.094	19.0296	176.82	19.0296	44.556	19.0296	100.663	51.945	0.67	0.35	0.07
19.1198	189.146	19.1198	67.277	19.1198	50.118	19.1198	63.571	19.1198	124.877	19.1198	69.255	19.1198	178.6	19.1198	44.502	19.1198	98.4183	54.3544	0.66	0.36	0.08
19.21	172.147	19.21	79.076	19.21	76.793	19.21	57.249	19.21	126.49	19.21	59.745	19.21	214.19	19.21	47.516	19.21	104.151	56.9951	0.69	0.38	0.08
19.3001	123.845	19.3001	79.227	19.3001	64.124	19.3001	66.846	19.3001	111.434	19.3001	61.502	19.3001	210.14	19.3001	48.021	19.3001	95.6424	49.5983	0.64	0.33	0.07
19.3903	128.082	19.3903	90.311	19.3903	61.984	19.3903	79.75	19.3903	145.003	19.3903	63.632	19.3903	249.75	19.3903	44.957	19.3903	107.934	62.2865	0.72	0.42	0.08
19.4805	165.258	19.4805	92.233	19.4805	56.791	19.4805	81.517	19.4805	142.827	19.4805	63.405	19.4805	226.01	19.4805	49.23	19.4805	109.659	58.5349	0.73	0.39	0.08
19.5707	140.646	19.5707	76.021	19.5707	69.934	19.5707	79.876	19.5707	127.837	19.5707	73.108	19.5707	214.29	19.5707	51.629	19.5707	104.168	50.37	0.69	0.34	0.07
19.6609	133.565	19.6609	78.607	19.6609	53.517	19.6609	83.66	19.6609	148.221	19.6609	73.665	19.6609	201.14	19.6609	53.837	19.6609	103.276	49.1238	0.69	0.33	0.07
19.7511	151.768	19.7511	69.605	19.7511	65.523	19.7511	70.053	19.7511	112.587	19.7511	71.081	19.7511	243.54	19.7511	58.637	19.7511	105.349	59.9685	0.7	0.4	0.08
19.8413	148.957	19.8413	89.04	19.8413	48.875	19.8413	85.671	19.8413	82.057	19.8413	68.014	19.8413	249.54	19.8413	55.845	19.8413	103.5	62.1439	0.69	0.41	0.08
19.9315	145.216	19.9315	79.531	19.9315	50.416	19.9315	78.963	19.9315	107.705	19.9315	60.457	19.9315	254.64	19.9315	51.228	19.9315	103.519	64.4018	0.69	0.43	0.08
20.0216	128.372	20.0216	76.595	20.0216	40.676	20.0216	77.242	20.0216	84.874	20.0216	49.775	20.0216	247.58	20.0216	61.566	20.0216	95.835	62.5096	0.64	0.42	0.08
20.1118	131.997	20.1118	86.134	20.1118	42.282	20.1118	64.234	20.1118	96.964	20.1118	46.521	20.1118	216.78	20.1118	70.394	20.1118	94.4133	53.5727	0.63	0.36	0.07
20.202	140.186	20.202	72.789	20.202	48.661	20.202	84.777	20.202	93.837	20.202	46.518	20.202	252.12	20.202	68.752	20.202	100.955	63.4732	0.67	0.42	0.08
20.2922	125.961	20.2922	80.132	20.2922	50.481	20.2922	68.203	20.2922	110.343	20.2922	45.096	20.2922	221.29	20.2922	76.987	20.2922	97.3116	53.4279	0.65	0.36	0.07
20.3824	136.192	20.3824	82.569	20.3824	59.536	20.3824	79.197	20.3824	82.697	20.3824	44.136	20.3824	208.14	20.3824	85.351	20.3824	97.2272	48.6715	0.65	0.32	0.07
20.4726	150.824	20.4726	75.631	20.4726	62.166	20.4726	67.342	20.4726	74.309	20.4726	40.591	20.4726	248.47	20.4726	95.521	20.4726	101.857	63.1468	0.68	0.42	0.08
20.5628	148.786	20.5628	86.432	20.5628	51.424	20.5628	98.117	20.5628	76.581	20.5628	44.72	20.5628	234.08	20.5628	104.828	20.5628	105.621	57.3145	0.7	0.38	0.08
20.653	155.35	20.653	82.396	20.653	52.888	20.653	67.095	20.653	86.345	20.653	46.191	20.653	243.92	20.653	103.245	20.653	104.679	61.5488	0.7	0.41	0.08
20.7431	141.405	20.7431	78.252	20.7431	48.888	20.7431	67.549	20.7431	88.976	20.7431	51.815	20.7431	233.54	20.7431	90.795	20.7431	100.153	57.2425	0.67	0.38	0.08
20.8333	126.956	20.8333	92.977	20.8333	51.002	20.8333	74.835	20.8333	85.237	20.8333	48.349	20.8333	238.46	20.8333	89.413	20.8333	100.904	56.9786	0.67	0.38	0.08
20.9235	123.506	20.9235	98.156	20.9235	56.754	20.9235	60.586	20.9235	72.994	20.9235	46.545	20.9235	230.21	20.9235	84.395	20.9235	96.6432	55.5365	0.64	0.37	0.08
21.0137	114.327	21.0137	83.832	21.0137	57.586	21.0137	103.829	21.0137	64.817	21.0137	54.894	21.0137	205.24	21.0137	89.697	21.0137	96.7777	45.6224	0.64	0.3	0.07
21.1039	119.247	21.1039	101.657	21.1039	62.403	21.1039	62.028	21.1039	77.869	21.1039	80.588	21.1039	234.49	21.1039	84.492	21.1039	102.847	52.8659	0.69	0.35	0.07
21.1941	133.647	21.1941	113.171	21.1941	59.353	21.1941	75.218	21.1941	73.195	21.1941	81.736	21.1941	198.28	21.1941	72.27	21.1941	100.859	43.3676	0.67	0.29	0.07
21.2843	135.962	21.2843	112.717	21.2843	50.388	21.2843	92.356	21.2843	74.478	21.2843	80.251	21.2843	194.87	21.2843	76.151	21.2843	102.147	42.6444	0.68	0.28	0.07
21.3745	117.585	21.3745	105.831	21.3745	47.847	21.3745	71.77	21.3745	98.042	21.3745	73.856	21.3745	234.81	21.3745	70.233	21.3745	102.497	54.2648	0.68	0.36	0.08
21.4646	102.914	21.4646	129.108	21.4646	51.251	21.4646	74.045	21.4646	103.007	21.4646	73.379	21.4646	243	21.4646	69.986	21.4646	105.836	56.68	0.71	0.38	0.08
21.5548	102.502	21.5548	129.317	21.5548	53.446	21.5548	93.102	21.5548	101.217	21.5548	62.709	21.5548	242.28	21.5548	83.462	21.5548	108.504	55.2395	0.72	0.37	0.08
21.645	110.995	21.645	118.781	21.645	49.016	21.645	90.696	21.645	104.901	21.645	88.492	21.645	234.91	21.645	76.382	21.645	109.272	51.7045	0.73	0.34	0.07
21.7352	103.469	21.7352	110.06	21.7352	44.576	21.7352	70.438	21.7352	110.839	21.7352	107.669	21.7352	234.81	21.7352	69.607	21.7352	106.433	53.6209	0.71	0.36	0.07
21.8254	129.517	21.8254	104.925	21.8254	29.237	21.8254	83.691	21.8254	120.907	21.8254	84.597	21.8254	241.83	21.8254	73.627	21.8254	108.541	58.171	0.72	0.39	0.08
21.9156	133.051	21.9156	106.276	21.9156	30.901	21.9156	88.328	21.9156	123.242	21.9156	83.12	21.9156	228.11	21.9156	65.841	21.9156	107.359	54.7878	0.72	0.37	0.08
22.0058	115.958	22.0058	98.955	22.0058	29.183	22.0058	79.728	22.0058	123.304	22.0058	90.198	22.0058	211.43	22.0058	60.187	22.0058	101.118	50.3893	0.67	0.34	0.07
22.096	111.872	22.096	121.291	22.096	28.155	22.096	87.5	22.096	131.504	22.096	74.287	22.096	234.56	22.096	58.464	22.096	105.954	58.2171	0.71	0.39	0.08
22.1861	155.627	22.1861	114.769	22.1861	48.573	22.1861	59.504	22.1861	126.059	22.1861	80.692	22.1861	222.07	22.1861	62.196	22.1861	108.686	55.1992	0.72	0.37	0.08
22.2763	122.686	22.2763	94.944	22.2763	54.021	22.2763	83.118	22.2763	131.093	22.2763	78.115	22.2763	241.65	22.2763	64.128	22.2763	108.719	56.045	0.72	0.37	0.08
22.3665	110.762	22.3665	93.511	22.3665	63.804	22.3665	75.021	22.3665	141.698	22.3665	90.231	22.3665	227.73	22.3665	65.541	22.3665	108.537	51.0459	0.72	0.34	0.07
22.4567	98.96	22.4567	91.067	22.4567	58.105	22.4567	75.287	22.4567	130.64	22.4567	116.419	22.4567	223.249	22.4567	83.151	22.4567	109.61	47.9461	0.73	0.32	0.07
22.5469	114.8	22.5469	81.979	22.5469	63.352	22.5469	48.805	22.5469	116.188	22.5469	109.53	22.5469	206.134	22.5469	70.72	22.5469	101.439	46.0514	0.68	0.31	0.07
22.6371	126.52	22.6371	89.955	22.6371	62.669	22.6371	69.141	22.6371	126.484	22.6371	112.895	22.6371	194.05	22.6371	69.389	22.6371	106.388	41.0393	0.71	0.27	0.07
22.7273	124	22.7273	93.711	22.7273	68.54	22.7273	74.165	22.7273	127.521	22.7273	114.469	22.7273	208.673	22.7273	84.98	22.7273	112.007	42.0141	0.75	0.28	0.07
22.8175	105.44	22.8175	95.163	22.8175	61.519	22.8175	80.297	22.8175	114.568	22.8175	124.153	22.8175	195.564	22.8175	79.126	22.8175	106.979	38.5619	0.71	0.26	0.06
22.9076	96.28	22.9076	93.634	22.9076	56.381	22.9076	80.504	22.9076	145.612	22.9076	109.22	22.9076	195.536	22.9076	77.851	22.9076	106.877	41.4456	0.71	0.28	0.07
22.9978	104.04	22.9978	85.084	22.9978	54.334	22.9978	83.154	22.9978	152.776	22.9978	95.834	22.9978	197.046	22.9978	77.245	22.9978	106.189	43.3588	0.71	0.29	0.07
23.088	104.16	23.088	83.363	23.088	59.994	23.088	74.38	23.088	129.198	23.088	106.214	23.088	204.614	23.088	60.077	23.088	102.75	44.6088	0.68	0.3	0.07
23.1782	104.56	23.1782	105.17	23.1782	70.917	23.1782	64.601	23.1782	135.819	23.1782	102.146	23.1782	201.537	23.1782	54.105	23.1782	104.857	44.2457	0.7	0.29	0.07
23.2684	101.52	23.2684	108.657	23.2684	81.763	23.2684	73.118	23.2684	122.673	23.2684	91.22	23.2684	151.959	23.2684	57.955	23.2684	98.6081	27.7841	0.66	0.19	0.05
23.3586	107.96	23.3586	104.84	23.3586	73.962	23.3586	84.243	23.3586	125.512	23.3586	112.962	23.3586	171.072	23.3586	61.419	23.3586	105.246	31.9207	0.7	0.21	0.06
23.4488	113	23.4488	112.071	23.4488	53.627	23.4488	71.293	23.4488	133.807	23.4488	115.564	23.4488	173.602	23.4488	60.032	23.4488	104.124	38.0017	0.69	0.25	0.06
23.539	139.88	23.539	115.348	23.539	66.236	23.539	63.901	23.539	147.082	23.539	100.668	23.539	147.693	23.539	50.698	23.539	103.938	37.1946	0.69	0.25	0.06
23.6291	157.56	23.6291	117.49	23.6291	82.228	23.6291	56.885	23.6291	152.983	23.6291	93.172	23.6291	175.347	23.6291	51.073	23.6291	110.842	44.4103	0.74	0.3	0.07
23.7193	156.44	23.7193	120.56	23.7193	78.273	23.7193	69.664	23.7193	149.34	23.7193	103.682	23.7193	166.543	23.7193	36.033	23.7193	110.067	43.528	0.73	0.29	0.07
23.8095	172.28	23.8095	110.286	23.8095	73.892	23.8095	60.444	23.8095	161.635	23.8095	117.043	23.8095	169.762	23.8095	60.336	23.8095	115.71	44.9047	0.77	0.3	0.07
23.8997	164.72	23.8997	114.275	23.8997	81.286	23.8997	57.904	23.8997	163.843	23.8997	112.915	23.8997	180.913	23.8997	47.401	23.8997	115.407	47.6603	0.77	0.32	0.07
23.9899	163.32	23.9899	110.369	23.9899	62.127	23.9899	68.992	23.9899	165.309	23.9899	97.726	23.9899	168.515	23.9899	67.558	23.9899	112.99	43.5606	0.75	0.29	0.07
24.0801	171.84	24.0801	116.357	24.0801	67.425	24.0801	100.208	24.0801	161.757	24.0801	99.014	24.0801	175.189	24.0801	38.022	24.0801	116.227	47.0277	0.77	0.31	0.07
24.1703	160.56	24.1703	94.56	24.1703	64.294	24.1703	92.318	24.1703	170.415	24.1703	108.188	24.1703	149.717	24.1703	49.578	24.1703	111.204	41.932	0.74	0.28	0.07
24.2605	141.48	24.2605	112.623	24.2605	61.905	24.2605	89.255	24.2605	166.19	24.2605	110.322	24.2605	151.628	24.2605	55.008	24.2605	111.051	38.1558	0.74	0.25	0.06
24.3506	146.52	24.3506	101.046	24.3506	64.072	24.3506	93.392	24.3506	155.273	24.3506	96.325	24.3506	128.986	24.3506	54.843	24.3506	105.057	33.9909	0.7	0.23	0.06
24.4408	141.48	24.4408	96.319	24.4408	63.78	24.4408	95	24.4408	152.191	24.4408	92.403	24.4408	133.503	24.4408	51.031	24.4408	103.213	34.0779	0.69	0.23	0.06
24.531	139.48	24.531	92.153	24.531	65.466	24.531	92.001	24.531	153.125	24.531	94.3	24.531	154.928	24.531	31.399	24.531	102.856	40.9107	0.69	0.27	0.07
24.6212	158.64	24.6212	70.272	24.6212	61.551	24.6212	96.348	24.6212	158.693	24.6212	83.525	24.6212	114.819	24.6212	44.513	24.6212	98.5451	40.0185	0.66	0.27	0.06
24.7114	152.64	24.7114	93.507	24.7114	55.851	24.7114	87.763	24.7114	131.133	24.7114	87.166	24.7114	127.699	24.7114	39.326	24.7114	96.8856	36.0849	0.65	0.24	0.06
24.8016	155.52	24.8016	93.713	24.8016	47.156	24.8016	87.579	24.8016	164.428	24.8016	90.714	24.8016	137.103	24.8016	34.282	24.8016	101.312	44.7041	0.68	0.3	0.07
24.8918	151.76	24.8918	86.604	24.8918	59.67	24.8918	85.589	24.8918	111.909	24.8918	94.433	24.8918	143.467	24.8918	43.187	24.8918	97.0774	35.2035	0.65	0.23	0.06
24.982	144.72	24.982	113.092	24.982	70.651	24.982	74.441	24.982	118.401	24.982	94.639	24.982	177.533	24.982	44.639	24.982	104.764	40.2303	0.7	0.27	0.06
25.0721	132.48	25.0721	91.516	25.0721	65.834	25.0721	86.095	25.0721	121.115	25.0721	92.505	25.0721	197.749	25.0721	47.651	25.0721	104.368	43.4917	0.7	0.29	0.07
25.1623	123.44	25.1623	108.304	25.1623	57.398	25.1623	113.688	25.1623	131.769	25.1623	97.68	25.1623	192.634	25.1623	39.175	25.1623	108.011	43.8786	0.72	0.29	0.07
25.2525	123.28	25.2525	108.7	25.2525	51.873	25.2525	74.375	25.2525	105.904	25.2525	88.525	25.2525	200.088	25.2525	40.361	25.2525	99.1382	46.537	0.66	0.31	0.07
25.3427	129.76	25.3427	104.497	25.3427	48.736	25.3427	74.247	25.3427	104.417	25.3427	69.068	25.3427	174.27	25.3427	42.574	25.3427	93.4461	41.297	0.62	0.28	0.07
25.4329	154.12	25.4329	100.194	25.4329	52.942	25.4329	86.054	25.4329	122.528	25.4329	83.548	25.4329	199.486	25.4329	37.141	25.4329	104.502	49.7528	0.7	0.33	0.07
25.5231	123.12	25.5231	81.445	25.5231	53.463	25.5231	91.697	25.5231	115.348	25.5231	85.669	25.5231	202.503	25.5231	34.113	25.5231	98.4197	47.9353	0.66	0.32	0.07
25.6133	127.8	25.6133	64.483	25.6133	51.95	25.6133	81.771	25.6133	106.622	25.6133	102.945	25.6133	197.038	25.6133	33.802	25.6133	95.8014	47.9393	0.64	0.32	0.07
25.7035	129.92	25.7035	79.138	25.7035	49.955	25.7035	87.734	25.7035	100.755	25.7035	117.462	25.7035	176.459	25.7035	37.936	25.7035	97.4199	41.7366	0.65	0.28	0.07
25.7936	137.36	25.7936	80.819	25.7936	41.008	25.7936	82.032	25.7936	91.809	25.7936	109.809	25.7936	187.1	25.7936	39.982	25.7936	96.2399	45.8331	0.64	0.31	0.07
25.8838	107.6	25.8838	86.866	25.8838	50.813	25.8838	83.725	25.8838	82.973	25.8838	96.841	25.8838	214.989	25.8838	48.302	25.8838	96.5136	48.7498	0.64	0.32	0.07
25.974	123.12	25.974	115.743	25.974	44.953	25.974	87.063	25.974	82.678	25.974	102.485	25.974	182.578	25.974	45.173	25.974	97.9741	41.95	0.65	0.28	0.07
26.0642	135.68	26.0642	134.018	26.0642	58.216	26.0642	102.237	26.0642	88.435	26.0642	115.873	26.0642	189.294	26.0642	38.968	26.0642	107.84	44.4037	0.72	0.3	0.07
26.1544	129.08	26.1544	133.175	26.1544	87.63	26.1544	88.422	26.1544	101.626	26.1544	118.965	26.1544	179.69	26.1544	39.889	26.1544	109.81	38.3888	0.73	0.26	0.06
26.2446	136.96	26.2446	117.609	26.2446	64.337	26.2446	73.705	26.2446	103.747	26.2446	104.973	26.2446	181.215	26.2446	38.43	26.2446	102.622	41.8478	0.68	0.28	0.07
26.3348	148.63	26.3348	111.035	26.3348	75.221	26.3348	63.839	26.3348	87.746	26.3348	123.702	26.3348	174.062	26.3348	46.176	26.3348	103.801	40.9066	0.69	0.27	0.07
26.425	169.166	26.425	121.06	26.425	64.424	26.425	83.372	26.425	88.681	26.425	114.455	26.425	170.973	26.425	49.66	26.425	107.724	42.1318	0.72	0.28	0.07
26.5152	179.109	26.5152	122.245	26.5152	68.96	26.5152	72.546	26.5152	79.651	26.5152	95.355	26.5152	136.797	26.5152	42.67	26.5152	99.6666	41.1488	0.66	0.27	0.07
26.6053	159.771	26.6053	131.997	26.6053	71.403	26.6053	61.943	26.6053	91.027	26.6053	120.239	26.6053	141.772	26.6053	44.012	26.6053	102.77	39.0045	0.68	0.26	0.06
26.6955	150.215	26.6955	132.781	26.6955	49.283	26.6955	72.543	26.6955	90.369	26.6955	96.864	26.6955	144.768	26.6955	57.436	26.6955	99.2824	36.8045	0.66	0.25	0.06
26.7857	146.359	26.7857	126.887	26.7857	61.238	26.7857	76.323	26.7857	97.709	26.7857	96.367	26.7857	155.018	26.7857	65.267	26.7857	103.146	33.7413	0.69	0.22	0.06
26.8759	169.544	26.8759	132.204	26.8759	47.93	26.8759	79.995	26.8759	92.741	26.8759	82.94	26.8759	142.993	26.8759	62.69	26.8759	101.38	39.6136	0.68	0.26	0.06
26.9661	164.446	26.9661	129.259	26.9661	43.106	26.9661	74.825	26.9661	71.062	26.9661	94.108	26.9661	153.873	26.9661	61.118	26.9661	98.9746	42.0683	0.66	0.28	0.07
27.0563	168.806	27.0563	126.085	27.0563	41.087	27.0563	62.625	27.0563	71.461	27.0563	90.843	27.0563	186.042	27.0563	51.794	27.0563	99.8429	51.1218	0.67	0.34	0.07
27.1465	178.428	27.1465	127.901	27.1465	50.988	27.1465	71.231	27.1465	73.198	27.1465	85.111	27.1465	196.142	27.1465	39.919	27.1465	102.865	54.6427	0.69	0.36	0.08
27.2367	171.629	27.2367	127.3	27.2367	46.207	27.2367	89.646	27.2367	52.697	27.2367	88.084	27.2367	189.225	27.2367	52.74	27.2367	102.191	51.7357	0.68	0.34	0.07
27.3268	132.153	27.3268	122.284	27.3268	41.869	27.3268	95.268	27.3268	69.452	27.3268	94.77	27.3268	146.844	27.3268	62.957	27.3268	95.6996	34.1158	0.64	0.23	0.06
27.417	149.011	27.417	134.516	27.417	50.218	27.417	83.043	27.417	80.49	27.417	89.876	27.417	140.455	27.417	64.404	27.417	99.0016	34.8892	0.66	0.23	0.06
27.5072	164.588	27.5072	120.92	27.5072	58.848	27.5072	67.135	27.5072	73.473	27.5072	98.934	27.5072	166.412	27.5072	65.97	27.5072	102.035	41.2661	0.68	0.27	0.07
27.5974	159.044	27.5974	117.914	27.5974	60.118	27.5974	62.444	27.5974	96.59	27.5974	101.483	27.5974	153.793	27.5974	62.398	27.5974	101.723	37.2589	0.68	0.25	0.06
27.6876	156.852	27.6876	124.755	27.6876	62.554	27.6876	59.474	27.6876	106.713	27.6876	95.871	27.6876	136.077	27.6876	72.477	27.6876	101.847	33.5101	0.68	0.22	0.06
27.7778	146.449	27.7778	116.516	27.7778	59.384	27.7778	52.773	27.7778	115.218	27.7778	100.556	27.7778	144.223	27.7778	81.643	27.7778	102.095	33.1658	0.68	0.22	0.06
27.868	126.84	27.868	102.697	27.868	44.752	27.868	44.826	27.868	120.092	27.868	115.142	27.868	136.273	27.868	97.321	27.868	98.4929	33.0943	0.66	0.22	0.06
27.9582	105.956	27.9582	100.89	27.9582	33.974	27.9582	41.895	27.9582	109.734	27.9582	117.606	27.9582	138.053	27.9582	101.535	27.9582	93.7054	34.1138	0.62	0.23	0.06
28.0483	100.226	28.0483	88.234	28.0483	47.172	28.0483	55.291	28.0483	115.648	28.0483	111.953	28.0483	143.473	28.0483	97.802	28.0483	94.9749	29.5986	0.63	0.2	0.06
28.1385	96.805	28.1385	69.763	28.1385	47.974	28.1385	77.55	28.1385	109.591	28.1385	123.845	28.1385	140.962	28.1385	105.389	28.1385	96.4849	28.2928	0.64	0.19	0.05
28.2287	96.476	28.2287	92.248	28.2287	62.147	28.2287	80.001	28.2287	129.942	28.2287	117.503	28.2287	132.427	28.2287	112.033	28.2287	102.847	23.0208	0.69	0.15	0.05
28.3189	95.151	28.3189	102.635	28.3189	59.287	28.3189	80	28.3189	135.641	28.3189	113.147	28.3189	125.028	28.3189	82.814	28.3189	99.2129	23.5795	0.66	0.16	0.05
28.4091	96.457	28.4091	104.18	28.4091	53.915	28.4091	76.883	28.4091	135.531	28.4091	125.466	28.4091	118.458	28.4091	108.429	28.4091	102.415	24.9106	0.68	0.17	0.05
28.4993	97.082	28.4993	105.353	28.4993	58.748	28.4993	64.986	28.4993	132.393	28.4993	101.526	28.4993	94.242	28.4993	121.412	28.4993	96.9677	23.5441	0.65	0.16	0.05
28.5895	117.885	28.5895	105.583	28.5895	48.714	28.5895	71.945	28.5895	110.277	28.5895	107.095	28.5895	88.69	28.5895	127.338	28.5895	97.1909	24.3323	0.65	0.16	0.05
28.6797	116.369	28.6797	101.408	28.6797	30.103	28.6797	89.15	28.6797	99.219	28.6797	81.369	28.6797	73.274	28.6797	129.638	28.6797	90.0662	28.3377	0.6	0.19	0.05
28.7698	142.384	28.7698	99.381	28.7698	58.265	28.7698	71.145	28.7698	104.096	28.7698	69.16	28.7698	60.673	28.7698	132.728	28.7698	92.229	30.5649	0.61	0.2	0.06
28.86	116.607	28.86	96.23	28.86	56.739	28.86	68.912	28.86	124.225	28.86	101.88	28.86	89.13	28.86	143.99	28.86	99.7141	26.8584	0.66	0.18	0.05
28.9502	112.22	28.9502	100.741	28.9502	69.054	28.9502	47.412	28.9502	125.181	28.9502	92	28.9502	85.079	28.9502	156.407	28.9502	98.5118	31.5392	0.66	0.21	0.06
29.0404	114.755	29.0404	103.988	29.0404	61.148	29.0404	63.622	29.0404	102.122	29.0404	84.48	29.0404	76.367	29.0404	118.78	29.0404	90.6577	20.9905	0.6	0.14	0.05
29.1306	90.408	29.1306	111.29	29.1306	55.7	29.1306	65.443	29.1306	106.197	29.1306	87.04	29.1306	73.644	29.1306	139.277	29.1306	91.1249	25.4698	0.61	0.17	0.05
29.2208	102.87	29.2208	100.722	29.2208	50.878	29.2208	62.261	29.2208	97.393	29.2208	62.92	29.2208	82.196	29.2208	138.733	29.2208	87.2466	26.7949	0.58	0.18	0.05
29.311	108.269	29.311	99.077	29.311	70.888	29.311	67.618	29.311	90.613	29.311	73.24	29.311	75.502	29.311	122.203	29.311	88.4262	18.6784	0.59	0.12	0.04
29.4012	100.688	29.4012	98.427	29.4012	86.115	29.4012	53.957	29.4012	88.709	29.4012	67.6	29.4012	77.191	29.4012	135.11	29.4012	88.4746	22.8671	0.59	0.15	0.05
29.4913	93.303	29.4913	94.844	29.4913	72.156	29.4913	56.968	29.4913	94.2	29.4913	67.04	29.4913	72.678	29.4913	129.831	29.4913	85.1275	21.4631	0.57	0.14	0.05
29.5815	113.341	29.5815	100.647	29.5815	70.7	29.5815	61.237	29.5815	86.329	29.5815	59.64	29.5815	65.167	29.5815	146.909	29.5815	87.9963	28.7584	0.59	0.19	0.05
29.6717	112.759	29.6717	108.145	29.6717	65.18	29.6717	69.784	29.6717	94.667	29.6717	59.28	29.6717	67.413	29.6717	108.293	29.6717	85.6901	21.0168	0.57	0.14	0.05
29.7619	102.399	29.7619	100.676	29.7619	74.786	29.7619	73.034	29.7619	90.197	29.7619	56.2	29.7619	64.628	29.7619	131.019	29.7619	86.6174	22.8152	0.58	0.15	0.05
29.8521	104.018	29.8521	105.171	29.8521	62.768	29.8521	91.107	29.8521	79.312	29.8521	41.32	29.8521	94.13	29.8521	126.285	29.8521	88.0139	24.8886	0.59	0.17	0.05
29.9423	110.904	29.9423	122.158	29.9423	72.047	29.9423	97.066	29.9423	82.865	29.9423	42.32	29.9423	84.315	29.9423	117.346	29.9423	91.1276	24.8435	0.61	0.17	0.05
30.0325	121.491	30.0325	106.653	30.0325	73.654	30.0325	81.783	30.0325	100.157	30.0325	47.04	30.0325	92.986	30.0325	102.443	30.0325	90.7759	21.5388	0.6	0.14	0.05
30.1227	127.159	30.1227	100.37	30.1227	68.798	30.1227	85.547	30.1227	121.002	30.1227	53.32	30.1227	101.692	30.1227	142.832	30.1227	100.09	28.2349	0.67	0.19	0.05
30.2128	122.68	30.2128	115.127	30.2128	87.418	30.2128	85.547	30.2128	121.26	30.2128	29.92	30.2128	96.155	30.2128	125.362	30.2128	97.9336	29.7856	0.65	0.2	0.06
30.303	117.518	30.303	111.021	30.303	67.79	30.303	81.116	30.303	126.702	30.303	28.84	30.303	109.112	30.303	133.528	30.303	96.9534	33.038	0.65	0.22	0.06
30.3932	124.301	30.3932	110.467	30.3932	67.999	30.3932	86.054	30.3932	130.019	30.3932	35.789	30.3932	124.244	30.3932	113.452	30.3932	99.0406	31.0327	0.66	0.21	0.06
30.4834	127.791	30.4834	105.707	30.4834	78.42	30.4834	77.735	30.4834	145.546	30.4834	35.835	30.4834	109.24	30.4834	122.595	30.4834	100.359	32.6971	0.67	0.22	0.06
30.5736	128.596	30.5736	89.554	30.5736	84.23	30.5736	69.066	30.5736	159.924	30.5736	23.896	30.5736	105.064	30.5736	123.499	30.5736	97.9786	38.8271	0.65	0.26	0.06
30.6638	132.153	30.6638	116.76	30.6638	80.701	30.6638	71.724	30.6638	143.371	30.6638	24.107	30.6638	107.914	30.6638	122.711	30.6638	99.9301	36.5819	0.67	0.24	0.06
30.754	151.693	30.754	121.487	30.754	63.672	30.754	79.473	30.754	146.934	30.754	32.956	30.754	108.418	30.754	136.503	30.754	105.142	39.9444	0.7	0.27	0.06
30.8442	157.955	30.8442	111.138	30.8442	71.434	30.8442	78.499	30.8442	145.721	30.8442	30.075	30.8442	136.593	30.8442	134.733	30.8442	108.269	41.442	0.72	0.28	0.07
30.9343	148.14	30.9343	97.992	30.9343	57.378	30.9343	63.2	30.9343	145.104	30.9343	31.89	30.9343	117.633	30.9343	137.515	30.9343	99.8565	41.6591	0.67	0.28	0.07
31.0245	127.256	31.0245	91.276	31.0245	80.472	31.0245	73.588	31.0245	154.149	31.0245	26.044	31.0245	133.92	31.0245	134.608	31.0245	102.664	39.6722	0.68	0.26	0.06
31.1147	130.563	31.1147	98.612	31.1147	84.63	31.1147	88.938	31.1147	160.158	31.1147	32.281	31.1147	163.42	31.1147	125.258	31.1147	110.483	40.7438	0.74	0.27	0.07
31.2049	125.831	31.2049	103.085	31.2049	76.144	31.2049	78.84	31.2049	142.889	31.2049	22.326	31.2049	148.166	31.2049	121.922	31.2049	102.4	39.2441	0.68	0.26	0.06
31.2951	117.269	31.2951	119.808	31.2951	89.832	31.2951	72.552	31.2951	156.723	31.2951	34.33	31.2951	165.086	31.2951	129.259	31.2951	110.607	40.7271	0.74	0.27	0.07
31.3853	115.664	31.3853	110.489	31.3853	78.389	31.3853	79.534	31.3853	160.218	31.3853	39.412	31.3853	147.193	31.3853	130.945	31.3853	107.731	37.4918	0.72	0.25	0.06
31.4755	118.911	31.4755	106.474	31.4755	75.542	31.4755	73.846	31.4755	160.721	31.4755	28.541	31.4755	137.832	31.4755	125.028	31.4755	103.362	39.4373	0.69	0.26	0.06
31.5657	122.716	31.5657	111.732	31.5657	78.957	31.5657	61.569	31.5657	202.35	31.5657	38.468	31.5657	140.611	31.5657	113.756	31.5657	108.77	47.5109	0.72	0.32	0.07
31.6558	109.365	31.6558	86.586	31.6558	77.182	31.6558	69.182	31.6558	137.324	31.6558	44.042	31.6558	143.834	31.6558	114.34	31.6558	97.7319	32.3039	0.65	0.22	0.06
31.746	114.97	31.746	84.471	31.746	80.524	31.746	66.614	31.746	116.658	31.746	46.274	31.746	150.778	31.746	137.449	31.746	99.7173	33.7331	0.66	0.22	0.06
31.8362	130.041	31.8362	96.263	31.8362	94.82	31.8362	56.768	31.8362	151.848	31.8362	38.633	31.8362	139.097	31.8362	151.243	31.8362	107.339	40.2956	0.72	0.27	0.06
31.9264	124.488	31.9264	90.902	31.9264	92.673	31.9264	53.783	31.9264	139.942	31.9264	38.719	31.9264	153.828	31.9264	153.421	31.9264	105.969	41.3658	0.71	0.28	0.07
32.0166	132.527	32.0166	84.297	32.0166	88.29	32.0166	75.595	32.0166	130.001	32.0166	31.751	32.0166	153.035	32.0166	142.099	32.0166	104.699	38.7358	0.7	0.26	0.06
32.1068	115.593	32.1068	81.986	32.1068	75.286	32.1068	82.8	32.1068	145.578	32.1068	32.696	32.1068	160.031	32.1068	136.41	32.1068	103.797	40.1489	0.69	0.27	0.06
32.197	97.711	32.197	81.192	32.197	83.883	32.197	60.713	32.197	131.97	32.197	35.71	32.197	140.02	32.197	148.464	32.197	97.4579	37.4435	0.65	0.25	0.06
32.2872	122.577	32.2872	76.795	32.2872	91.693	32.2872	76.619	32.2872	155.288	32.2872	39.177	32.2872	119.092	32.2872	162.276	32.2872	105.44	39.4115	0.7	0.26	0.06
32.3773	126.222	32.3773	62.784	32.3773	82.209	32.3773	82.741	32.3773	149.369	32.3773	34.204	32.3773	133.281	32.3773	138.475	32.3773	101.161	38.7792	0.67	0.26	0.06
32.4675	124.303	32.4675	91.214	32.4675	86.944	32.4675	74.238	32.4675	126.996	32.4675	33	32.4675	139.607	32.4675	125.072	32.4675	100.172	33.3857	0.67	0.22	0.06
32.5577	117.427	32.5577	95.407	32.5577	77.11	32.5577	74.244	32.5577	161.689			32.5577	126.32	32.5577	124.977	32.5577	111.025	28.7437	0.74	0.19	0.06
32.6479	115.727	32.6479	67.828	32.6479	72.654	32.6479	76.334	32.6479	166.913			32.6479	124.325	32.6479	118.157	32.6479	105.991	33.2474	0.71	0.22	0.07
32.7381	113.324	32.7381	62.246	32.7381	93.185	32.7381	74.621	32.7381	143.566			32.7381	139.754	32.7381	143.019	32.7381	109.959	31.46	0.73	0.21	0.07
32.8283	120.141	32.8283	54.077	32.8283	100.189	32.8283	64.621	32.8283	151.133			32.8283	131.741	32.8283	135.925	32.8283	108.261	34.2288	0.72	0.23	0.07
32.9185	130.921	32.9185	76.211	32.9185	84.264	32.9185	75.759	32.9185	149.651			32.9185	117.577	32.9185	121.922	32.9185	108.044	27.1481	0.72	0.18	0.06
33.0087	137.073	33.0087	74.423	33.0087	82.184	33.0087	93.106	33.0087	137.269			33.0087	123.816	33.0087	113.559	33.0087	108.776	23.888	0.72	0.16	0.06
33.0988	127.834	33.0988	60.598	33.0988	78.588	33.0988	89.624	33.0988	136.876			33.0988	111.433	33.0988	132.667	33.0988	105.374	27.3832	0.7	0.18	0.06
33.189	121.08	33.189	67.49	33.189	70.601	33.189	79.282	33.189	128.509			33.189	110.78	33.189	108.004	33.189	97.9637	23.1727	0.65	0.15	0.06
33.2792	118.631	33.2792	66.667	33.2792	79.523	33.2792	75.228	33.2792	134.327			33.2792	124.842	33.2792	117.753	33.2792	102.424	25.5249	0.68	0.17	0.06
33.3694	119.19	33.3694	75.206	33.3694	94.798	33.3694	96.816	33.3694	136.871			33.3694	121.901	33.3694	118.881	33.3694	109.095	19.4085	0.73	0.13	0.05
33.4596	126.996	33.4596	80.79	33.4596	89.361	33.4596	69.057	33.4596	134.767			33.4596	145.855	33.4596	120.381	33.4596	109.601	27.3862	0.73	0.18	0.06
33.5498	129.354	33.5498	96.687	33.5498	69.989	33.5498	98.199	33.5498	143.669			33.5498	110.306	33.5498	109.727	33.5498	108.276	22.0549	0.72	0.15	0.05
33.64	153.062	33.64	68.845	33.64	66.13	33.64	98.47	33.64	160.153			33.64	146.876	33.64	106.259	33.64	114.256	36.5824	0.76	0.24	0.07
33.7302	138.633	33.7302	76.798	33.7302	72.062	33.7302	93.83	33.7302	154.229			33.7302	122.919	33.7302	125.3	33.7302	111.967	29.1623	0.75	0.19	0.06
33.8203	129.336	33.8203	85.397	33.8203	71.831	33.8203	87.989	33.8203	140.46			33.8203	132.758	33.8203	132.743	33.8203	111.502	26.3703	0.74	0.18	0.06
33.9105	131.677	33.9105	99.724	33.9105	62.42	33.9105	85.952	33.9105	139.359			33.9105	131.271	33.9105	124.693	33.9105	110.728	26.5767	0.74	0.18	0.06
34.0007	132.911	34.0007	68.458	34.0007	77.214	34.0007	86.641	34.0007	163.814			34.0007	126.441	34.0007	131.89	34.0007	112.481	32.6749	0.75	0.22	0.07
34.0909	137.547	34.0909	84.323	34.0909	68.665	34.0909	82.991	34.0909	132.333			34.0909	139.36	34.0909	143.363	34.0909	112.655	29.9541	0.75	0.2	0.06
34.1811	109.967	34.1811	74.32	34.1811	82.055	34.1811	79.914	34.1811	150.522			34.1811	162.185	34.1811	115.78	34.1811	110.678	32.414	0.74	0.22	0.07
34.2713	99.679	34.2713	89.489	34.2713	84.775	34.2713	73.562	34.2713	156.965			34.2713	146.797	34.2713	117.463	34.2713	109.819	29.5356	0.73	0.2	0.06
34.3615	127.406	34.3615	89.129	34.3615	75.011	34.3615	77.693	34.3615	161.485			34.3615	140.574	34.3615	117.787	34.3615	112.726	30.7074	0.75	0.2	0.06
34.4517	148.382	34.4517	117.264	34.4517	76.804	34.4517	63.349	34.4517	151.545			34.4517	134.222	34.4517	119.747	34.4517	115.902	31.5507	0.77	0.21	0.07
34.5418	123.356	34.5418	122.551	34.5418	87.634	34.5418	57.88	34.5418	163.321			34.5418	139.674	34.5418	107.561	34.5418	114.568	31.9289	0.76	0.21	0.07
34.632	108.014	34.632	121.726	34.632	66.039	34.632	68.712	34.632	152.682			34.632	136.742	34.632	135.029	34.632	112.706	31.3751	0.75	0.21	0.07
34.7222	118.212	34.7222	125.502	34.7222	73.27	34.7222	80.291	34.7222	154.696			34.7222	129.079	34.7222	129.21	34.7222	115.751	26.8293	0.77	0.18	0.06
34.8124	120.728	34.8124	118.969	34.8124	60.291	34.8124	72.433	34.8124	152.195			34.8124	130.151	34.8124	124.268	34.8124	111.291	30.3696	0.74	0.2	0.06
34.9026	141.952	34.9026	129.807	34.9026	74.686	34.9026	71.335	34.9026	155.148			34.9026	142.612	34.9026	129.623	34.9026	120.738	31.2483	0.8	0.21	0.07
34.9928	177.5	34.9928	131.11	34.9928	70.991	34.9928	78.607	34.9928	143.865			34.9928	151.517	34.9928	124.819	34.9928	125.487	35.6977	0.84	0.24	0.07
35.083	172.653	35.083	133.396	35.083	73.737	35.083	92.692	35.083	165.993			35.083	154.139	35.083	83.013	35.083	125.089	38.3692	0.83	0.26	0.07
35.1732	188.355	35.1732	133.621	35.1732	74.595	35.1732	85.879	35.1732	156.098			35.1732	154.199	35.1732	109.069	35.1732	128.831	38.0414	0.86	0.25	0.07
35.2633	213.62	35.2633	131.337	35.2633	69.59	35.2633	95.149	35.2633	151.295			35.2633	142.554	35.2633	96.311	35.2633	128.551	44.0606	0.86	0.29	0.08
35.3535	201.291	35.3535	131.626	35.3535	89.885	35.3535	94.744	35.3535	145.032			35.3535	150.426	35.3535	92.243	35.3535	129.321	37.8017	0.86	0.25	0.07
35.4437	192.562	35.4437	114.792	35.4437	58.813	35.4437	82.184	35.4437	160.874			35.4437	163.14	35.4437	66.243	35.4437	119.801	49.1173	0.8	0.33	0.08
35.5339	200.419	35.5339	134.675	35.5339	77.229	35.5339	77.771	35.5339	171.792			35.5339	134.232	35.5339	53.186	35.5339	121.329	50.1881	0.81	0.33	0.08
35.6241	198.23	35.6241	144.54	35.6241	78.869	35.6241	82.468	35.6241	150.24			35.6241	148.788	35.6241	48.249	35.6241	121.626	48.8371	0.81	0.33	0.08
35.7143	168.843	35.7143	127.059	35.7143	89.494	35.7143	98.338	35.7143	149.432			35.7143	150.329	35.7143	50.259	35.7143	119.108	38.6923	0.79	0.26	0.07
35.8045	204.675	35.8045	139.957	35.8045	81.127	35.8045	86.08	35.8045	161.41			35.8045	156.011	35.8045	44.049	35.8045	124.758	51.8947	0.83	0.35	0.08
35.8947	212.441	35.8947	115.929	35.8947	89.982	35.8947	92.629	35.8947	155.096			35.8947	155.01	35.8947	26.088	35.8947	121.025	55.3969	0.81	0.37	0.09
35.9848	224.249	35.9848	98.052	35.9848	71.965	35.9848	89.824	35.9848	174.226			35.9848	146.623	35.9848	30.786	35.9848	119.389	61.1477	0.8	0.41	0.09
36.075	246.685	36.075	122.161	36.075	74.943	36.075	86.918	36.075	165.586			36.075	166.7	36.075	28.61	36.075	127.372	66.9851	0.85	0.45	0.1
36.1652	247.736	36.1652	108.808	36.1652	66.164	36.1652	104.989	36.1652	165.391			36.1652	161.175	36.1652	24.908	36.1652	125.596	67.7647	0.84	0.45	0.1
36.2554	211.914	36.2554	120.506	36.2554	72.772	36.2554	98.2	36.2554	155.958			36.2554	178.196	36.2554	35.141	36.2554	124.67	57.1743	0.83	0.38	0.09
36.3456	197.943	36.3456	132.195	36.3456	68.787	36.3456	105.078	36.3456	177.802			36.3456	205.663	36.3456	37.752	36.3456	132.174	60.3274	0.88	0.4	0.09
36.4358	200.8	36.4358	129.787	36.4358	83.847	36.4358	92.456	36.4358	186.404			36.4358	214.227	36.4358	40.104	36.4358	135.375	61.768	0.9	0.41	0.09
36.526	177.447	36.526	116.793	36.526	77.944	36.526	96.358	36.526	186.948			36.526	205.224	36.526	34.005	36.526	127.817	58.9802	0.85	0.39	0.09
36.6162	173.53	36.6162	100.737	36.6162	75.759	36.6162	80.455	36.6162	174.371			36.6162	192.732	36.6162	31.147	36.6162	118.39	57.172	0.79	0.38	0.09
36.7063	192.912	36.7063	99.866	36.7063	82.63	36.7063	69.883	36.7063	181.202			36.7063	204.824	36.7063	42.906	36.7063	124.889	61.35	0.83	0.41	0.09
36.7965	193.336	36.7965	86.343	36.7965	67.395	36.7965	64.448	36.7965	178.57			36.7965	194.85	36.7965	34.693	36.7965	117.091	63.9367	0.78	0.43	0.09
36.8867	202.444	36.8867	104.145	36.8867	76.719	36.8867	92.621	36.8867	181.784			36.8867	210.354	36.8867	42.797	36.8867	130.123	61.9853	0.87	0.41	0.09
36.9769	213.75	36.9769	107.956	36.9769	72.116	36.9769	56.818	36.9769	184.329			36.9769	199.474	36.9769	53.965	36.9769	126.915	65.1363	0.85	0.43	0.09
37.0671	204.167	37.0671	98.471	37.0671	79.315	37.0671	83.899	37.0671	201.845			37.0671	194.854	37.0671	45.575	37.0671	129.732	62.8876	0.86	0.42	0.09
37.1573	198.184	37.1573	91.636	37.1573	73.318	37.1573	72.856	37.1573	171.106			37.1573	206.331	37.1573	35.186	37.1573	121.231	63.8824	0.81	0.43	0.09
37.2475	198.582	37.2475	121.803	37.2475	75.647	37.2475	72.148	37.2475	178.351			37.2475	197.645	37.2475	46.825	37.2475	127.286	59.5842	0.85	0.4	0.09
37.3377	208.844	37.3377	147.708	37.3377	75.381	37.3377	73.514	37.3377	192.095			37.3377	212.841	37.3377	39.987	37.3377	135.767	66.86	0.9	0.45	0.1
37.4278	195.549	37.4278	128.776	37.4278	75.023	37.4278	78.5	37.4278	191.371			37.4278	230.109	37.4278	36.634	37.4278	133.709	68.0147	0.89	0.45	0.1
37.518	193.725	37.518	107.246	37.518	68.74	37.518	58.68	37.518	205.834			37.518	218.559	37.518	36.186	37.518	126.996	71.4636	0.85	0.48	0.1
37.6082	190.257	37.6082	108.54	37.6082	62.838	37.6082	75.151	37.6082	215.848			37.6082	235.861	37.6082	38.309	37.6082	132.401	74.2139	0.88	0.49	0.1
37.6984	168.633	37.6984	111.349	37.6984	48.65	37.6984	79.071	37.6984	187.832			37.6984	229.029	37.6984	44.496	37.6984	124.151	66.8417	0.83	0.45	0.1
37.7886	161.784	37.7886	113.492	37.7886	53.79	37.7886	67.862	37.7886	207.819			37.7886	222.681	37.7886	62	37.7886	127.061	65.6407	0.85	0.44	0.09
37.8788	189.639	37.8788	119.686	37.8788	55.35	37.8788	58.384	37.8788	203.509			37.8788	220.912			37.8788	141.247	67.4219	0.94	0.45	0.11
37.969	186.922	37.969	111.584	37.969	52.158	37.969	58.803	37.969	185.001			37.969	218.572			37.969	135.507	65.0587	0.9	0.43	0.11
38.0592	184.643	38.0592	108.959	38.0592	71.034	38.0592	51.01	38.0592	159.131			38.0592	218.573			38.0592	132.225	60.2897	0.88	0.4	0.11
38.1493	206.334	38.1493	104.956	38.1493	61.145	38.1493	49.303	38.1493	165.749			38.1493	199.9			38.1493	131.231	63.0635	0.87	0.42	0.11
38.2395	203.145	38.2395	104.981	38.2395	52.435	38.2395	69.543	38.2395	162.189			38.2395	201.021			38.2395	132.219	60.1361	0.88	0.4	0.11
38.3297	189.71	38.3297	101.602	38.3297	53.021	38.3297	66.726	38.3297	164.318			38.3297	210.349			38.3297	130.954	60.4557	0.87	0.4	0.11
38.4199	204.565	38.4199	124.028	38.4199	71.923	38.4199	65.563	38.4199	160.37			38.4199	161.68			38.4199	131.355	50.0593	0.88	0.33	0.1
38.5101	198.027	38.5101	134.429	38.5101	81.654	38.5101	76.947	38.5101	167.884			38.5101	186.004			38.5101	140.824	47.7283	0.94	0.32	0.09
38.6003	202.896	38.6003	119.534	38.6003	63.003	38.6003	66.143	38.6003	171.313			38.6003	197.491			38.6003	136.73	57.7057	0.91	0.38	0.1
38.6905	209.074	38.6905	109.519	38.6905	56.523	38.6905	71.025	38.6905	171.834			38.6905	157.595			38.6905	129.262	54.8595	0.86	0.37	0.1
38.7807	192.6	38.7807	108.853	38.7807	52.852	38.7807	76.539	38.7807	164.418			38.7807	151.017			38.7807	124.38	49.3502	0.83	0.33	0.1
38.8708	185.67	38.8708	112.846	38.8708	51.573	38.8708	67.791	38.8708	149.094			38.8708	137.542			38.8708	117.419	46.3429	0.78	0.31	0.09
38.961	165.217	38.961	112.781	38.961	57.44	38.961	53.643	38.961	144.184			38.961	117.781			38.961	108.508	41.2534	0.72	0.27	0.09
39.0512	163.639	39.0512	130.558	39.0512	72.132	39.0512	64.521	39.0512	128.841			39.0512	123.705			39.0512	113.899	34.7699	0.76	0.23	0.08
39.1414	206.469	39.1414	129.291	39.1414	70.445	39.1414	71.278	39.1414	122.235			39.1414	141.469			39.1414	123.531	46.1589	0.82	0.31	0.09
39.2316	229.323	39.2316	113.808	39.2316	58.091	39.2316	71	39.2316	124.899			39.2316	117.276			39.2316	119.066	55.151	0.79	0.37	0.1
39.3218	221.685	39.3218	120.051	39.3218	74.336			39.3218	125.125			39.3218	145.602			39.3218	137.36	48.1663	0.92	0.32	0.11
39.412	209.111	39.412	108.946	39.412	58.027			39.412	98.241			39.412	118.859			39.412	118.637	49.7375	0.79	0.33	0.12
39.5022	217.016	39.5022	95.889	39.5022	77.485			39.5022	79.339			39.5022	123.936			39.5022	118.733	51.8879	0.79	0.35	0.12
39.5924	183.55	39.5924	112.427	39.5924	68.036			39.5924	77.122			39.5924	128.534			39.5924	113.934	41.2882	0.76	0.28	0.1
39.6825	201.992	39.6825	117.992	39.6825	69.41			39.6825	61.797			39.6825	117.795			39.6825	113.797	49.9723	0.76	0.33	0.12
39.7727	241.446	39.7727	99.446	39.7727	74.76			39.7727	60.293			39.7727	124.738			39.7727	120.137	64.5066	0.8	0.43	0.13
39.8629	213.608	39.8629	122.898	39.8629	77.12			39.8629	47.29			39.8629	113.519			39.8629	114.887	56.2274	0.77	0.37	0.12
39.9531	216.774	39.9531	143.379	39.9531	78.29			39.9531	57.332			39.9531	91.026			39.9531	117.36	57.2424	0.78	0.38	0.12
40.0433	218.41	40.0433	144.327	40.0433	75.42			40.0433	71.459			40.0433	94.769			40.0433	120.877	55.2317	0.81	0.37	0.12
40.1335	227.491	40.1335	124.872	40.1335	63.77			40.1335	69.892			40.1335	98.335			40.1335	116.872	59.4494	0.78	0.4	0.13
40.2237	220.814	40.2237	125.309	40.2237	76.86			40.2237	71.171			40.2237	102.282			40.2237	119.287	54.3109	0.79	0.36	0.12
40.3139	192.461	40.3139	101.44	40.3139	101.23			40.3139	69.766			40.3139	103.067			40.3139	113.593	41.3577	0.76	0.28	0.1
40.404	171.027	40.404	101.516	40.404	85.32			40.404	85.91			40.404	94.519			40.404	107.658	32.2427	0.72	0.21	0.09
40.4942	205.022	40.4942	111.079	40.4942	69.05			40.4942	118.085			40.4942	114.808			40.4942	123.609	44.4291	0.82	0.3	0.11
40.5844	198.722	40.5844	99.806	40.5844	75.12			40.5844	119.939			40.5844	120.229			40.5844	122.763	41.4272	0.82	0.28	0.11
40.6746	173.404	40.6746	77.643	40.6746	81.46			40.6746	134.625			40.6746	111.964			40.6746	115.819	35.5598	0.77	0.24	0.1
40.7648	172.225	40.7648	52.221	40.7648	87.71			40.7648	106.37			40.7648	101.409			40.7648	103.987	39.0216	0.69	0.26	0.1
40.855	191.234	40.855	66.359	40.855	85.88			40.855	107.04			40.855	93.754			40.855	108.853	43.2467	0.73	0.29	0.11
40.9452	163.407	40.9452	85.457	40.9452	87.06			40.9452	119.451			40.9452	106.874			40.9452	112.45	28.4605	0.75	0.19	0.09
41.0354	163.242	41.0354	81.85	41.0354	84.12			41.0354	119.705			41.0354	81.342			41.0354	106.052	32.0451	0.71	0.21	0.09
41.1255	161.905	41.1255	79.128	41.1255	89.99			41.1255	126			41.1255	95.27			41.1255	110.459	30.065	0.74	0.2	0.09
41.2157	191.582	41.2157	81.325	41.2157	92.89							41.2157	122.438			41.2157	122.059	42.8476	0.81	0.29	0.13
41.3059	196.69	41.3059	83.862	41.3059	90.23							41.3059	113.522			41.3059	121.076	45.0303	0.81	0.3	0.14
41.3961	190.825	41.3961	91.347	41.3961	93.983							41.3961	166.676			41.3961	135.708	43.8913	0.9	0.29	0.14
41.4863	182.662	41.4863	96.434	41.4863	80.934							41.4863	178.923			41.4863	134.738	46.398	0.9	0.31	0.14
41.5765	195.506	41.5765	119.549	41.5765	74.736							41.5765	167.835			41.5765	139.406	46.1842	0.93	0.31	0.14
41.6667	186.648	41.6667	115.645	41.6667	96.125							41.6667	185.918			41.6667	146.084	40.7879	0.97	0.27	0.13
41.7569	197.134	41.7569	107.535	41.7569	104.309							41.7569	189.392			41.7569	149.593	43.7711	1	0.29	0.14
41.847	187.657	41.847	114.816	41.847	91.841							41.847	192.806			41.847	146.78	44.2417	0.98	0.29	0.14
41.9372	176.829	41.9372	87.561	41.9372	93.649							41.9372	196.609			41.9372	138.662	48.6108	0.92	0.32	0.14
42.0274	190.159	42.0274	98.718	42.0274	94.084							42.0274	193.597			42.0274	144.139	47.7821	0.96	0.32	0.14
42.1176	170.152	42.1176	83.881	42.1176	97.054							42.1176	174.898			42.1176	131.496	41.3263	0.88	0.28	0.13
42.2078	172.622	42.2078	83.196	42.2078	97.043							42.2078	133			42.2078	121.465	34.6808	0.81	0.23	0.12
42.298	211.918	42.298	88.011	42.298	88.337											42.298	129.422	58.3336	0.86	0.39	0.21
42.3882	176.704	42.3882	105.058	42.3882	76.112											42.3882	119.291	42.2818	0.79	0.28	0.18
42.4784	194.47	42.4784	100.319	42.4784	73.969											42.4784	122.919	51.7249	0.82	0.34	0.2
42.5685	202.438	42.5685	89.026	42.5685	82.663											42.5685	124.709	55.0241	0.83	0.37	0.2
42.6587	220.376	42.6587	79.839	42.6587	69.588											42.6587	123.268	68.7934	0.82	0.46	0.23
42.7489	210.812	42.7489	87.068	42.7489	70.55											42.7489	122.81	62.5911	0.82	0.42	0.22
42.8391	201.854	42.8391	82.222	42.8391	70.446											42.8391	118.174	59.3657	0.79	0.4	0.21
42.9293	194.309	42.9293	97.699	42.9293	69.586											42.9293	120.531	53.4162	0.8	0.36	0.2
43.0195	209.992	43.0195	113.144	43.0195	91.122											43.0195	138.086	51.6339	0.92	0.34	0.2
43.1097	191.591	43.1097	121.912	43.1097	88.934											43.1097	134.146	42.793	0.89	0.29	0.18
43.1999	200.312	43.1999	102.663	43.1999	91.295											43.1999	131.423	48.9322	0.88	0.33	0.19
43.29	185.581	43.29	103.019	43.29	81.285											43.29	123.295	44.9277	0.82	0.3	0.18
43.3802	200.414	43.3802	97.269	43.3802	64.198											43.3802	120.627	58.0109	0.8	0.39	0.21
43.4704	207.433	43.4704	92.374	43.4704	86.096											43.4704	128.634	55.778	0.86	0.37	0.2
43.5606	167.221	43.5606	111.932	43.5606	94.961											43.5606	124.705	30.8516	0.83	0.21	0.15
43.6508	135.956	43.6508	97.805	43.6508	96.02											43.6508	109.927	18.4197	0.73	0.12	0.12
43.741	121.587	43.741	98.329	43.741	93.105											43.741	104.34	12.3803	0.7	0.08	0.1
43.8312	125.105	43.8312	98.012	43.8312	96.932											43.8312	106.683	13.0338	0.71	0.09	0.1
43.9214	117.494	43.9214	113.847	43.9214	92.973											43.9214	108.105	10.8028	0.72	0.07	0.09
44.0115	136.037	44.0115	90.588	44.0115	90.257											44.0115	105.627	21.5033	0.7	0.14	0.13
44.1017	152.656	44.1017	78.762	44.1017	104.127											44.1017	111.848	30.6572	0.75	0.2	0.15
44.1919	156.122	44.1919	83.592	44.1919	100.256											44.1919	113.323	31.0185	0.76	0.21	0.15
44.2821	133.575	44.2821	96.405	44.2821	74.782											44.2821	101.587	24.2803	0.68	0.16	0.13
44.3723	145.297	44.3723	92.13	44.3723	84.1											44.3723	107.176	27.1545	0.71	0.18	0.14
44.4625	134.758	44.4625	118.45	44.4625	88.746											44.4625	113.985	19.0478	0.76	0.13	0.12
44.5527	129.641	44.5527	87.783	44.5527	94.056											44.5527	103.827	18.4323	0.69	0.12	0.12
44.6429	114.401	44.6429	105.338	44.6429	109.287											44.6429	109.675	3.71013	0.73	0.02	0.05
44.733	95.253	44.733	93.127	44.733	98.439											44.733	95.6063	2.18296	0.64	0.01	0.04
44.8232	101.724	44.8232	78.325	44.8232	96.362											44.8232	92.137	10.0089	0.61	0.07	0.09
44.9134	112.739	44.9134	84.544	44.9134	89.923											44.9134	95.7353	12.2223	0.64	0.08	0.1
45.0036	114.75	45.0036	77.803	45.0036	82.487											45.0036	91.68	16.4246	0.61	0.11	0.11
45.0938	110.987	45.0938	96.088	45.0938	85.765											45.0938	97.6133	10.3532	0.65	0.07	0.09
45.184	100.069	45.184	83.895	45.184	87.524											45.184	90.496	6.92937	0.6	0.05	0.07
45.2742	91.193	45.2742	89.277	45.2742	101.91											45.2742	94.1267	5.55896	0.63	0.04	0.06
45.3644	91.504	45.3644	101.116	45.3644	90.133											45.3644	94.251	4.88645	0.63	0.03	0.06
45.4545	103.692	45.4545	93.74	45.4545	85.18											45.4545	94.204	7.56461	0.63	0.05	0.07
45.5447	90.932	45.5447	85.69	45.5447	78.99											45.5447	85.204	4.8874	0.57	0.03	0.06
45.6349	78.835	45.6349	80.464	45.6349	80.618											45.6349	79.9723	0.80667	0.53	0.01	0.02
45.7251	80.287	45.7251	60.12	45.7251	67.03											45.7251	69.1457	8.36796	0.46	0.06	0.08
45.8153	87.644	45.8153	60.636	45.8153	55.702											45.8153	67.994	14.0399	0.45	0.09	0.1
45.9055	81.019	45.9055	75.791	45.9055	64.777											45.9055	73.8623	6.76956	0.49	0.05	0.07
45.9957	84.675	45.9957	67.596	45.9957	71.094											45.9957	74.455	7.36638	0.5	0.05	0.07
46.0859	73.617	46.0859	68.763	46.0859	73.685											46.0859	72.0217	2.30439	0.48	0.02	0.04
46.176	63.253	46.176	77.364	46.176	71.246											46.176	70.621	5.77772	0.47	0.04	0.07
46.2662	33.846	46.2662	80.82	46.2662	72.831											46.2662	62.499	20.5216	0.42	0.14	0.12
46.3564	58.256	46.3564	73.347	46.3564	66.002											46.3564	65.8683	6.1616	0.44	0.04	0.07
46.4466	38.091	46.4466	64.736	46.4466	67.975											46.4466	56.934	13.3895	0.38	0.09	0.1
46.5368	42.277	46.5368	56.387	46.5368	65.157											46.5368	54.607	9.42514	0.36	0.06	0.08
46.627	39.991	46.627	49.899	46.627	67.197											46.627	52.3623	11.2426	0.35	0.07	0.09
46.7172	31.127	46.7172	44.186	46.7172	71.849											46.7172	49.054	16.9773	0.33	0.11	0.11
46.8074	35.044	46.8074	44.619	46.8074	71.187											46.8074	50.2833	15.2893	0.34	0.1	0.11
46.8975	48.031	46.8975	36.552	46.8975	65.891											46.8975	50.158	12.0717	0.33	0.08	0.09
46.9877	34.281	46.9877	36.459	46.9877	60.657											46.9877	43.799	11.9535	0.29	0.08	0.09
47.0779	37.55	47.0779	34.641	47.0779	54.362											47.0779	42.1843	8.69242	0.28	0.06	0.08
47.1681	44.274	47.1681	29.033	47.1681	54.187											47.1681	42.498	10.3456	0.28	0.07	0.09
47.2583	49.296	47.2583	38.805	47.2583	56.185											47.2583	48.0953	7.14597	0.32	0.05	0.07
47.3485	33.238	47.3485	22.077	47.3485	67.696											47.3485	41.0037	19.4165	0.27	0.13	0.12
47.4387	34.141	47.4387	27.941	47.4387	67.673											47.4387	43.2517	17.453	0.29	0.12	0.11
47.5289	40.18	47.5289	24.275	47.5289	56.905											47.5289	40.4533	13.3225	0.27	0.09	0.1
47.619	42.913	47.619	28.724	47.619	63.51											47.619	45.049	14.2814	0.3	0.1	0.1
47.7092	42	47.7092	36.36	47.7092	64.016											47.7092	47.4587	11.9321	0.32	0.08	0.09
47.7994	52.927	47.7994	27.846	47.7994	80.795											47.7994	53.856	21.6263	0.36	0.14	0.13
47.8896	84.371	47.8896	36.804	47.8896	72.413											47.8896	64.5293	20.2034	0.43	0.13	0.12
47.9798	100.676	47.9798	52.626	47.9798	52.888											47.9798	68.73	22.5895	0.46	0.15	0.13
48.07	99.942	48.07	45.678	48.07	56.815											48.07	67.4783	23.4012	0.45	0.16	0.13
48.1602	91.01	48.1602	54.775	48.1602	54.163											48.1602	66.6493	17.2274	0.44	0.11	0.11
48.2504	91.169	48.2504	45.557	48.2504	48.416											48.2504	61.714	20.8605	0.41	0.14	0.12
48.3405	81.426	48.3405	64.426	48.3405	46.025											48.3405	63.959	14.4562	0.43	0.1	0.1
48.4307	73.973	48.4307	67.735	48.4307	41.513											48.4307	61.0737	14.064	0.41	0.09	0.1
48.5209	89.417	48.5209	70.915	48.5209	32.902											48.5209	64.4113	23.526	0.43	0.16	0.13
48.6111	84	48.6111	64.246	48.6111	31.557											48.6111	59.9343	21.6258	0.4	0.14	0.13
		48.7013	56.274	48.7013	25.835											48.7013	41.0545	15.2195	0.27	0.1	0.16
		48.7915	74.439	48.7915	22.79											48.7915	48.6145	25.8245	0.32	0.17	0.21
		48.8817	79.221	48.8817	30.756											48.8817	54.9885	24.2325	0.37	0.16	0.2
		48.9719	81.826	48.9719	33.566											48.9719	57.696	24.13	0.38	0.16	0.2
		49.062	67.463	49.062	23.8											49.062	45.6315	21.8315	0.3	0.15	0.19
		49.1522	46.755	49.1522	25.677											49.1522	36.216	10.539	0.24	0.07	0.13
		49.2424	44	49.2424	18.217											49.2424	31.1085	12.8915	0.21	0.09	0.15
				49.3326	18.321											49.3326	18.321	0	0.12	0	0
				49.4228	23.308											49.4228	23.308	0	0.16	0	0
				49.513	23.316											49.513	23.316	0	0.16	0	0
				49.6032	30.837											49.6032	30.837	0	0.21	0	0
				49.6934	37.901											49.6934	37.901	0	0.25	0	0
				49.7835	31.41											49.7835	31.41	0	0.21	0	0
				49.8737	23.711											49.8737	23.711	0	0.16	0	0
				49.9639	27.054											49.9639	27.054	0	0.18	0	0
				50.0541	31.271											50.0541	31.271	0	0.21	0	0
				50.1443	33.545											50.1443	33.545	0	0.22	0	0
				50.2345	34.837											50.2345	34.837	0	0.23	0	0
				50.3247	42.583											50.3247	42.583	0	0.28	0	0
				50.4149	45.234											50.4149	45.234	0	0.3	0	0
				50.505	46.03											50.505	46.03	0	0.31	0	0
				50.5952	63.277											50.5952	63.277	0	0.42	0	0
				50.6854	51.215											50.6854	51.215	0	0.34	0	0
				50.7756	47.181											50.7756	47.181	0	0.31	0	0
				50.8658	45.445											50.8658	45.445	0	0.3	0	0
				50.956	62.593											50.956	62.593	0	0.42	0	0
				51.0462	46.644											51.0462	46.644	0	0.31	0	0
				51.1364	55.866											51.1364	55.866	0	0.37	0	0
				51.2265	72.95											51.2265	72.95	0	0.49	0	0
				51.3167	61.217											51.3167	61.217	0	0.41	0	0
				51.4069	66											51.4069	66	0	0.44	0	0

## Sheet: 2E_BdPAN1-YFP
Quantification of fluorescence intensity of BdPAN1-YFP (DZ...) lines along the SMC circumference using manual tracing. X is the position along the circumference and Y is the gray value.
8-1-1 right		8-2-1 right		8-2-2 left		8-2-2 left		8-3 right		7-2-1 right		1-1_		2-1 left		2-1 right		4-1 left		4-1 right		4-2 left		4-2 right
X	Y	X	Y	X	Y	X	Y	X	Y	X	Y	X	Y	X	Y	X	Y	X	Y	X	Y	X	Y	X	Y	x position	averages	nomalized average	normalized st.dev	normalized std err
0	53.68	0	34.921	0	47.334	0	57.217	0	36.59	0	42.029	0	49.644	0	33.864	0	22.069	0	25.4008	0	17.988	0	19.5142	0	20.65	0	35.4539	0.3	0.11	0.03
0.0902	44.32	0.0902	53.81	0.0902	41.402	0.0902	58.725	0.0902	26.926	0.0901	52.314	0.0902	49.331	0.0902	41.274	0.0902	26.182	0.0902	30.3224	0.0902	43.519	0.0902	28.2067	0.0902	26.786	0.0901923	40.2399	0.34	0.09	0.02
0.1804	46.08	0.1804	52.894	0.1804	44.151	0.1804	47.702	0.1804	32.382	0.1802	48.529	0.1804	44.964	0.1804	55.288	0.1804	41.279	0.1804	34.6302	0.1804	39.675	0.1804	39.2357	0.1804	28.029	0.180385	42.6799	0.37	0.07	0.02
0.2706	40.4	0.2706	57.003	0.2706	33.304	0.2706	45.578	0.2706	26.014	0.2704	54.11	0.2706	76.235	0.2706	50.029	0.2706	37.79	0.2706	31.6721	0.2706	43.096	0.2706	36.6409	0.2706	22.736	0.270585	42.6622	0.37	0.12	0.03
0.3608	45.6	0.3608	64.124	0.3608	49.686	0.3608	44.648	0.3608	36.314	0.3605	68.863	0.3608	93.057	0.3608	50.811	0.3608	39.329	0.3608	34.6727	0.3608	44.996	0.3608	41.3277	0.3608	25.676	0.360777	49.1619	0.42	0.14	0.03
0.4509	46.48	0.4509	66.494	0.4509	56.013	0.4509	43.409	0.4509	37.14	0.4506	83.696	0.4509	101.367	0.4509	59.774	0.4509	61.74	0.4509	51.3153	0.4509	57.176	0.4509	45.3509	0.4509	40.242	0.450877	57.7075	0.49	0.15	0.03
0.5411	38.4	0.5411	78.528	0.5411	68.441	0.5411	51.776	0.5411	40.373	0.5407	92.828	0.5411	128.885	0.5411	73.214	0.5411	71.889	0.5411	59.9794	0.5411	68.638	0.5411	49.2404	0.5411	38.485	0.541069	66.2059	0.57	0.21	0.04
0.6313	42.84	0.6313	112.738	0.6313	96.399	0.6313	59.213	0.6313	32.401	0.6308	100.561	0.6313	170.88	0.6313	91.919	0.6313	55.582	0.6313	56.7769	0.6313	80.294	0.6313	52.5547	0.6313	31.698	0.631262	75.6813	0.65	0.32	0.04
0.7215	49.56	0.7215	132	0.7215	114.078	0.7215	56.332	0.7215	56.268	0.721	95.111	0.7215	196.617	0.7215	103.526	0.7215	65.938	0.7215	59.0123	0.7215	80.817	0.7215	46.6507	0.7215	42.635	0.721462	84.5035	0.72	0.36	0.05
0.8117	71.52	0.8117	132.202	0.8117	118.252	0.8117	65.211	0.8117	57.136	0.8111	108.615	0.8117	211.629	0.8117	129.589	0.8117	76.025	0.8117	45.2199	0.8117	88.601	0.8117	51.0017	0.8117	58.138	0.811654	93.3184	0.8	0.38	0.05
0.9019	75.72	0.9019	176.798	0.9019	123.98	0.9019	69.806	0.9019	57.39	0.9012	143.911	0.9019	223.51	0.9019	117.636	0.9019	79.595	0.9019	44.3321	0.9019	115.327	0.9019	53.5804	0.9019	63.364	0.901846	103.458	0.89	0.44	0.05
0.9921	75.76	0.9921	190.746	0.9921	145.579	0.9921	80.593	0.9921	75.022	0.9913	145.098	0.9921	233.477	0.9921	104.55	0.9921	105.574	0.9921	50.4812	0.9921	113.924	0.9921	58.8279	0.9921	66.102	0.992038	111.21	0.95	0.45	0.05
1.0823	82.84	1.0823	161.07	1.0823	142.168	1.0823	97.794	1.0823	82.41	1.0814	152.031	1.0823	252.175	1.0823	117.198	1.0823	105.456	1.0823	57.5422	1.0823	98.88	1.0823	59.8004	1.0823	41.145	1.08223	111.578	0.96	0.46	0.05
1.1724	93.36	1.1724	178.17	1.1724	131.547	1.1724	107.378	1.1724	99.463	1.1716	173.786	1.1724	234.657	1.1724	118.942	1.1724	108.176	1.1724	55.9922	1.1724	88.919	1.1724	67.912	1.1724	59.166	1.17234	116.728	1	0.43	0.05
1.2626	87.64	1.2626	176.361	1.2626	144.509	1.2626	106.104	1.2626	93.095	1.2617	179.4	1.2626	189.169	1.2626	116.471	1.2626	89.509	1.2626	43.6652	1.2626	104.65	1.2626	69.169	1.2626	63.626	1.26253	112.567	0.96	0.38	0.05
1.3528	104.76	1.3528	175.82	1.3528	154.638	1.3528	129.997	1.3528	116.365	1.3518	179.681	1.3528	158.424	1.3528	110.764	1.3528	107.903	1.3528	41.9236	1.3528	89.384	1.3528	65.5573	1.3528	64.269	1.35272	115.345	0.99	0.36	0.05
1.443	104.92	1.443	174.183	1.443	169.894	1.443	157.44	1.443	108.542	1.4419	183.253	1.443	145.444	1.443	98.178	1.443	93.22	1.443	54.3589	1.443	75.117	1.443	64.9197	1.443	63.816	1.44292	114.868	0.98	0.38	0.05
1.5332	158.48	1.5332	181.393	1.5332	146.171	1.5332	163.715	1.5332	113.614	1.532	187.916	1.5332	105.828	1.5332	97.989	1.5332	74.668	1.5332	52.8899	1.5332	69.595	1.5332	67.6179	1.5332	69.342	1.53311	114.555	0.98	0.39	0.05
1.6234	141.8	1.6234	174.086	1.6234	158.955	1.6234	145.206	1.6234	112.681	1.6222	201.612	1.6234	98.513	1.6234	107.211	1.6234	75.207	1.6234	48.9013	1.6234	66.164	1.6234	63.6431	1.6234	67.03	1.62331	112.385	0.96	0.4	0.05
1.7136	161.4	1.7136	166.315	1.7136	143.306	1.7136	152.827	1.7136	112.479	1.7123	192.089	1.7136	102.397	1.7136	93.373	1.7136	48.939	1.7136	54.0129	1.7136	52.672	1.7136	59.346	1.7136	70.088	1.7135	108.403	0.93	0.41	0.05
1.8038	166.44	1.8038	136.272	1.8038	167.406	1.8038	162.046	1.8038	84.876	1.8024	159.834	1.8038	86.082	1.8038	77.143	1.8038	51.211	1.8038	55.9085	1.8038	54.796	1.8038	69.1215	1.8038	60.56	1.80369	102.438	0.88	0.39	0.05
1.8939	167.28	1.8939	106.37	1.8939	187.349	1.8939	154.599	1.8939	89.46	1.8925	157.186	1.8939	105.13	1.8939	73.486	1.8939	59.019	1.8939	59.6935	1.8939	64.854	1.8939	63.7382	1.8939	62.557	1.89379	103.902	0.89	0.39	0.05
1.9841	169.52	1.9841	114.78	1.9841	154.834	1.9841	157.195	1.9841	64.563	1.9826	163.006	1.9841	102.471	1.9841	71.37	1.9841	67.641	1.9841	60.0051	1.9841	61.085	1.9841	68.2368	1.9841	59.004	1.98398	101.055	0.87	0.37	0.05
2.0743	139.6	2.0743	85.541	2.0743	167.435	2.0743	140.437	2.0743	63.379	2.0728	170.349	2.0743	86.166	2.0743	64.957	2.0743	53.953	2.0743	47.7427	2.0743	57.411	2.0743	70.1079	2.0743	60.37	2.07418	92.8807	0.8	0.37	0.05
2.1645	173.32	2.1645	81.675	2.1645	149.777	2.1645	119.862	2.1645	60.973	2.1629	164.725	2.1645	85.099	2.1645	61.24	2.1645	44.659	2.1645	42.0193	2.1645	59.908	2.1645	53.6222	2.1645	44.955	2.16438	87.8334	0.75	0.39	0.05
2.2547	171.04	2.2547	84.893	2.2547	144.945	2.2547	110.404	2.2547	39.7	2.253	144.565	2.2547	84.294	2.2547	47.466	2.2547	32.261	2.2547	43.0584	2.2547	62.106	2.2547	35.4859	2.2547	46.855	2.25457	80.5441	0.69	0.39	0.05
2.3449	129.52	2.3449	70.808	2.3449	133.688	2.3449	116.704	2.3449	62.901	2.3431	149.15	2.3449	87.456	2.3449	58.519	2.3449	53.131	2.3449	43.9782	2.3449	67.745	2.3449	40.0696	2.3449	62.98	2.34476	82.8192	0.71	0.3	0.04
2.4351	157.52	2.4351	79.627	2.4351	122.25	2.4351	110.271	2.4351	55.333	2.4333	146.456	2.4351	78.468	2.4351	57.664	2.4351	42.017	2.4351	37.6879	2.4351	68.087	2.4351	54.8787	2.4351	52.84	2.43496	81.7769	0.7	0.33	0.04
2.5253	115.797	2.5253	86.274	2.5253	130.595	2.5253	105.571	2.5253	50.131	2.5234	118.487	2.5253	84.258	2.5253	44.164	2.5253	47.101	2.5253	34.2885	2.5253	76.494	2.5253	54.4936	2.5253	76.173	2.52515	78.7559	0.67	0.26	0.04
2.6154	102.939	2.6154	99.226	2.6154	116.158	2.6154	104.812	2.6154	56.841	2.6135	110.164	2.6154	88.054	2.6154	67.761	2.6154	56.898	2.6154	49.0309	2.6154	90.061	2.6154	47.2333	2.6154	60.994	2.61525	80.7825	0.69	0.21	0.03
2.7056	95.774	2.7056	110.353	2.7056	105.961	2.7056	101.184	2.7056	47.696	2.7036	118.048	2.7056	85.675	2.7056	43.972	2.7056	45.814	2.7056	46.3274	2.7056	97.036	2.7056	55.4435	2.7056	71.498	2.70545	78.8294	0.68	0.23	0.04
2.7958	95.869	2.7958	116.068	2.7958	110.49	2.7958	85.055	2.7958	63.813	2.7937	128.669	2.7958	104.232	2.7958	61.952	2.7958	53.415	2.7958	47.0797	2.7958	96.868	2.7958	54.8833	2.7958	80.415	2.79564	84.5238	0.72	0.22	0.04
2.886	85.842	2.886	125.888	2.886	84.107	2.886	96.507	2.886	61.186	2.8839	124.035	2.886	118.247	2.886	47.592	2.886	76.079	2.886	49.5662	2.886	95.494	2.886	64.4161	2.886	69.431	2.88584	84.4916	0.72	0.22	0.04
2.9762	89.07	2.9762	140.743	2.9762	76.322	2.9762	85.389	2.9762	59.879	2.974	123.502	2.9762	123.839	2.9762	48.65	2.9762	70.035	2.9762	43.3638	2.9762	98.897	2.9762	62.7169	2.9762	85.998	2.97603	85.2619	0.73	0.25	0.04
3.0664	107.288	3.0664	112.192	3.0664	86.79	3.0664	98.758	3.0664	45.303	3.0641	139.012	3.0664	123.854	3.0664	51.747	3.0664	43.193	3.0664	44.024	3.0664	91.734	3.0664	51.5709	3.0664	77.345	3.06622	82.5239	0.71	0.27	0.04
3.1566	110.866	3.1566	99.891	3.1566	68.164	3.1566	107.346	3.1566	72.968	3.1542	164.488	3.1566	128.626	3.1566	50.127	3.1566	60.772	3.1566	37.7039	3.1566	80.214	3.1566	53.4087	3.1566	96.167	3.15642	86.9801	0.75	0.29	0.04
3.2468	106.666	3.2468	102.3	3.2468	78.553	3.2468	96.9	3.2468	47.825	3.2443	161.354	3.2468	151.178	3.2468	50.942	3.2468	58.683	3.2468	42.3082	3.2468	79.38	3.2468	56.8528	3.2468	102.631	3.24661	87.3518	0.75	0.31	0.04
3.3369	122.301	3.3369	81.941	3.3369	94.431	3.3369	84.796	3.3369	57.383	3.3345	144.259	3.3369	163.171	3.3369	67.398	3.3369	51.206	3.3369	58.043	3.3369	69.432	3.3369	65.0309	3.3369	115.046	3.33672	90.3414	0.77	0.29	0.04
3.4271	133.802	3.4271	89.583	3.4271	101.168	3.4271	87.706	3.4271	75.254	3.4246	132.777	3.4271	173.343	3.4271	75.489	3.4271	59.769	3.4271	57.8794	3.4271	69.465	3.4271	73.0178	3.4271	99.825	3.42691	94.5445	0.81	0.28	0.04
3.5173	156.29	3.5173	85.06	3.5173	109.002	3.5173	97.467	3.5173	80.918	3.5147	162.194	3.5173	191.577	3.5173	85.833	3.5173	78.393	3.5173	64.6138	3.5173	59.945	3.5173	63.9112	3.5173	84.101	3.5171	101.485	0.87	0.35	0.05
3.6075	188.764	3.6075	74.414	3.6075	113.477	3.6075	112.346	3.6075	79.787	3.6048	198.316	3.6075	189.109	3.6075	84.529	3.6075	77.073	3.6075	73.2923	3.6075	71.065	3.6075	53.4133	3.6075	82.45	3.60729	107.541	0.92	0.42	0.05
3.6977	187.01	3.6977	67.071	3.6977	123.401	3.6977	104.794	3.6977	88.55	3.6949	186.527	3.6977	198.117	3.6977	83.597	3.6977	67.777	3.6977	76.9865	3.6977	74.177	3.6977	51.0797	3.6977	71.39	3.69748	106.191	0.91	0.42	0.05
3.7879	181.503	3.7879	59.381	3.7879	102.089	3.7879	119.491	3.7879	103.381	3.7851	188.133	3.7879	214.898	3.7879	110.785	3.7879	87.119	3.7879	76.263	3.7879	67.988	3.7879	67.9395	3.7879	77.14	3.78768	112.008	0.96	0.42	0.05
3.8781	207.412	3.8781	51.608	3.8781	109.877	3.8781	136.462	3.8781	102.569	3.8752	195.636	3.8781	218.537	3.8781	98.227	3.8781	115.889	3.8781	74.4436	3.8781	52.515	3.8781	68.6648	3.8781	77.265	3.87788	116.085	0.99	0.47	0.05
3.9683	210.315	3.9683	44.835	3.9683	121.459	3.9683	142.623	3.9683	112.339	3.9653	189.147	3.9683	193.862	3.9683	99.571	3.9683	129.639	3.9683	83.2015	3.9683	53.041	3.9683	50.3581	3.9683	43.448	3.96807	113.372	0.97	0.48	0.05
4.0584	213.112	4.0584	41.129	4.0584	126.823	4.0584	138.545	4.0584	122.676	4.0554	206.553	4.0584	175.276	4.0584	86.48	4.0584	112.57	4.0584	66.0183	4.0584	53.214	4.0584	38.8379	4.0584	53.837	4.05817	110.39	0.95	0.5	0.05
4.1486	188.816	4.1486	31.871	4.1486	120.479	4.1486	143.992	4.1486	110.072	4.1455	209.695	4.1486	146.016	4.1486	65.961	4.1486	84.593	4.1486	48.9548	4.1486	34.764	4.1486	35.6276	4.1486	55.558	4.14836	98.1846	0.84	0.5	0.05
4.2388	171.008	4.2388	31.325	4.2388	134.692	4.2388	143.559	4.2388	110.752	4.2357	209.894	4.2388	84.497	4.2388	59.021	4.2388	89.615	4.2388	53.8288	4.2388	41.322	4.2388	28.9454	4.2388	57.145	4.23856	93.508	0.8	0.47	0.05
4.329	159.749	4.329	35.957	4.329	150.028	4.329	144.983	4.329	80.47	4.3258	208.504	4.329	63.85	4.329	52.192	4.329	95.342	4.329	46.2388	4.329	38.73	4.329	23.1344	4.329	49.266	4.32875	88.3419	0.76	0.48	0.05
4.4192	138.221	4.4192	31.542	4.4192	160.452	4.4192	146.579	4.4192	73.431	4.4159	181.311	4.4192	62.8	4.4192	48.891	4.4192	54.433	4.4192	27.2692	4.4192	35.139	4.4192	19.9167	4.4192	36.409	4.41895	78.1841	0.67	0.47	0.05
4.5094	117.251	4.5094	26.966	4.5094	128.312	4.5094	130.739	4.5094	64.93	4.506	162.035	4.5094	63.859	4.5094	38.304	4.5094	53.303	4.5094	26.997	4.5094	29.748	4.5094	21.9946	4.5094	36.96	4.50914	69.3384	0.59	0.4	0.05
4.5996	97.498	4.5996	23.299	4.5996	116.43	4.5996	107.342	4.5996	56.411	4.5961	141.68	4.5996	44.971	4.5996	37.019	4.5996	43.946	4.5996	21.7578	4.5996	33.437	4.5996	21.2288	4.5996	27.034	4.59933	59.3887	0.51	0.34	0.04
4.6898	70.792	4.6898	30.868	4.6898	114.528	4.6898	104.287	4.6898	54.457	4.6863	125.795	4.6898	40.622	4.6898	14.351	4.6898	28.955	4.6898	27.9877	4.6898	28.228	4.6898	18.12	4.6898	26.326	4.68953	52.7167	0.45	0.32	0.04
4.7799	69.074	4.7799	28.667	4.7799	105.875	4.7799	83.889	4.7799	44.197	4.7764	132.601	4.7799	26.497	4.7799	16.717	4.7799	14.185	4.7799	30.4863	4.7799	26.82	4.7799	17.6083	4.7799	26.069	4.77963	47.8989	0.41	0.31	0.04
4.8701	53.661	4.8701	33.265	4.8701	78.722	4.8701	56.764	4.8701	33.488	4.8665	126.328	4.8701	13.015	4.8701	16.453	4.8701	13.005	4.8701	18.4821	4.8701	20.951	4.8701	20.3892	4.8701	26.196	4.86982	39.2861	0.34	0.27	0.04
4.9603	44.52	4.9603	33.95	4.9603	85.301	4.9603	60.328	4.9603	39.723	4.9566	108.695	4.9603	11.369	4.9603	19.041	4.9603	17.17	4.9603	22.263	4.9603	14.43	4.9603	15.6876	4.9603	22.347	4.96002	38.0634	0.33	0.25	0.04
5.0505	29.95	5.0505	32.083	5.0505	81.167	5.0505	42.635	5.0505	22.624	5.0467	96.911	5.0505	14.073	5.0505	17.776	5.0505	19.998	5.0505	11.3918	5.0505	13.132	5.0505	10.4077	5.0505	30.409	5.05021	32.5044	0.28	0.22	0.04
5.1407	21.78	5.1407	28.489	5.1407	64.555	5.1407	33.059	5.1407	25.305	5.1369	78.929	5.1407	4.641	5.1407	12.594	5.1407	10.674	5.1407	16.9113	5.1407	12.195	5.1407	11.9528	5.1407	32.544	5.14041	27.2022	0.23	0.18	0.03
5.2309	28.158	5.2309	20.306	5.2309	37.485	5.2309	31.492	5.2309	17.447	5.227	65.554	5.2309	20.911	5.2309	7.85	5.2309	8.738	5.2309	15.1744	5.2309	9.271	5.2309	11.5312	5.2309	36.732	5.2306	23.8961	0.2	0.13	0.03
5.3211	35.017	5.3211	25.322	5.3211	43.896	5.3211	26.176	5.3211	19.447	5.3171	51.179	5.3211	21.744	5.3211	5.576	5.3211	12.704	5.3211	5.5442	5.3211	11.12	5.3211	9.1225	5.3211	27.185	5.32079	22.6179	0.19	0.12	0.03
5.4113	33.788	5.4113	26.083	5.4113	40.83	5.4113	31.816	5.4113	15.455	5.4072	38.582	5.4113	26.641	5.4113	7.485	5.4113	5.588	5.4113	8.7517	5.4113	13.361	5.4113	4.3958	5.4113	22.847	5.41098	21.2018	0.18	0.11	0.03
5.5014	35.155	5.5014	16.958	5.5014	39.088	5.5014	32.487	5.5014	14.482	5.4973	44.01	5.5014	22.539	5.5014	8.452	5.5014	3.781	5.5014	13.7782	5.5014	15.878	5.5014	6.7989	5.5014	25.058	5.50108	21.4204	0.18	0.11	0.03
5.5916	33.856	5.5916	36.131	5.5916	25.645	5.5916	28.897	5.5916	19.316	5.5875	43.988	5.5916	13.721	5.5916	9.262	5.5916	10.011	5.5916	10.5896	5.5916	12.452	5.5916	9.2311	5.5916	24.721	5.59128	21.3708	0.18	0.1	0.02
5.6818	34.334	5.6818	35.841	5.6818	21.701	5.6818	22.978	5.6818	23.52	5.6776	38.849	5.6818	10.262	5.6818	10.105	5.6818	13.747	5.6818	15.4666	5.6818	26.463	5.6818	6.122	5.6818	18.046	5.68148	21.3411	0.18	0.09	0.02
5.772	28.446	5.772	35.899	5.772	20.313	5.772	11.97	5.772	16.127	5.7677	39.022	5.772	14.409	5.772	12.485	5.772	8.565	5.772	14.381	5.772	19.093	5.772	8.3806	5.772	14.427	5.77167	18.7321	0.16	0.08	0.02
5.8622	24.822	5.8622	35.317	5.8622	24.415	5.8622	17.074	5.8622	14.316	5.8578	41.948	5.8622	17.223	5.8622	8.779	5.8622	7.926	5.8622	12.232	5.8622	10.06	5.8622	8.9587	5.8622	14.995	5.86186	18.3127	0.16	0.09	0.02
5.9524	28.794	5.9524	42.823	5.9524	31.544	5.9524	14.694	5.9524	16.377	5.9479	41.232	5.9524	11.972	5.9524	5.771	5.9524	7.903	5.9524	19.3549	5.9524	15.11	5.9524	9.4821	5.9524	13.199	5.95205	19.8658	0.17	0.1	0.02
6.0426	22.939	6.0426	45.137	6.0426	21.072	6.0426	15.03	6.0426	17.768	6.0381	42.133	6.0426	17.288	6.0426	4.176	6.0426	9.364	6.0426	17.279	6.0426	10.066	6.0426	10.0769	6.0426	7.9	6.04225	18.4791	0.16	0.1	0.02
6.1328	15.235	6.1328	44.645	6.1328	11.591	6.1328	13.681	6.1328	10.945	6.1282	38.573	6.1328	20.684	6.1328	3.107	6.1328	11.297	6.1328	8.9224	6.1328	10.104	6.1328	7.5913	6.1328	7.068	6.13245	15.6495	0.13	0.1	0.02
6.2229	17.112	6.2229	46.75	6.2229	20.487	6.2229	17.121	6.2229	13.828	6.2183	41.876	6.2229	20.651	6.2229	2.713	6.2229	13.937	6.2229	7.1646	6.2229	11.3	6.2229	14.2224	6.2229	9.821	6.22255	18.2295	0.16	0.1	0.02
6.3131	27.236	6.3131	52.908	6.3131	20.771	6.3131	13.543	6.3131	14.986	6.3084	24.102	6.3131	19.056	6.3131	4.178	6.3131	7.029	6.3131	11.747	6.3131	14.597	6.3131	8.894	6.3131	7.469	6.31274	17.4243	0.15	0.1	0.02
6.4033	33.117	6.4033	54.142	6.4033	21.139	6.4033	14.777	6.4033	9.736	6.3985	29.487	6.4033	17.888	6.4033	7.757	6.4033	7.391	6.4033	11.1436	6.4033	15.629	6.4033	14.0372	6.4033	7.656	6.40293	18.7615	0.16	0.11	0.03
6.4935	28.596	6.4935	58.15	6.4935	24.869	6.4935	20.929	6.4935	7.165	6.4887	21.114	6.4935	17.56	6.4935	9.379	6.4935	5.657	6.4935	8.4636	6.4935	11.062	6.4935	11.6304	6.4935	9.498	6.49313	18.0056	0.15	0.12	0.03
6.5837	22.429	6.5837	65.515	6.5837	30.221	6.5837	24.01	6.5837	9.956	6.5788	24.645	6.5837	13.128	6.5837	7.312	6.5837	2.556	6.5837	14.1458	6.5837	10.781	6.5837	18.7868	6.5837	13.614	6.58332	19.7769	0.17	0.13	0.03
6.6739	17.476	6.6739	50.218	6.6739	29.034	6.6739	12.609	6.6739	12.901	6.6689	22.189	6.6739	11.003	6.6739	11.909	6.6739	8.766	6.6739	15.5083	6.6739	7.759	6.6739	14.7073	6.6739	17.231	6.67352	17.7931	0.15	0.09	0.02
6.7641	19.099	6.7641	43.29	6.7641	14.228	6.7641	19.738	6.7641	11.641	6.759	27.993	6.7641	14.172	6.7641	10.761	6.7641	16.717	6.7641	7.6203	6.7641	9.659	6.7641	7.8335	6.7641	15.352	6.76371	16.7772	0.14	0.08	0.02
6.8543	16.602	6.8543	41.961	6.8543	14.942	6.8543	20.312	6.8543	11.105	6.8491	28.325	6.8543	13.334	6.8543	9.074	6.8543	11.861	6.8543	10.9722	6.8543	12.752	6.8543	7.9291	6.8543	11.437	6.8539	16.2005	0.14	0.08	0.02
6.9444	14.835	6.9444	43.289	6.9444	22.682	6.9444	24.395	6.9444	11.017	6.9393	31.512	6.9444	13.02	6.9444	6.143	6.9444	8.826	6.9444	13.8619	6.9444	11.356	6.9444	10.5068	6.9444	12.921	6.94401	17.2588	0.15	0.09	0.02
7.0346	22.626	7.0346	41.697	7.0346	24.844	7.0346	21.994	7.0346	15.346	7.0294	22.32	7.0346	12.906	7.0346	10.151	7.0346	11.155	7.0346	18.6453	7.0346	9.307	7.0346	14.7084	7.0346	11.189	7.0342	18.2222	0.16	0.07	0.02
7.1248	24.444	7.1248	43.781	7.1248	18.069	7.1248	13.114	7.1248	15.843	7.1195	20.525	7.1248	8.141	7.1248	9.629	7.1248	8.812	7.1248	18.1214	7.1248	8.298	7.1248	13.2196	7.1248	16.417	7.12439	16.8011	0.14	0.08	0.02
7.215	21.344	7.215	34.425	7.215	21.154	7.215	20.728	7.215	13.042	7.2096	27.153	7.215	6.708	7.215	10.293	7.215	9.576	7.215	22.6271	7.215	12.548	7.215	10.6873	7.215	9.705	7.21458	16.9223	0.14	0.07	0.02
7.3052	17.696	7.3052	28.926	7.3052	16.001	7.3052	18.196	7.3052	8.345	7.2998	35.021	7.3052	12.584	7.3052	8.663	7.3052	12.733	7.3052	20.3254	7.3052	11.961	7.3052	12.6113	7.3052	18.738	7.30478	17.0616	0.15	0.06	0.02
7.3954	16.363	7.3954	33.883	7.3954	27.08	7.3954	15.651	7.3954	7.473	7.3899	41.085	7.3954	21.637	7.3954	6	7.3954	17.739	7.3954	19.6601	7.3954	12.811	7.3954	14.7258	7.3954	22.391	7.39498	19.7307	0.17	0.08	0.02
7.4856	20.652	7.4856	41.155	7.4856	23.483	7.4856	20.262	7.4856	10.092	7.48	39.623	7.4856	15.086	7.4856	8.013	7.4856	14.665	7.4856	12.4819	7.4856	10.516	7.4856	13.3653	7.4856	17.176	7.48517	18.9669	0.16	0.09	0.02
7.5758	16.345	7.5758	42.085	7.5758	21.776	7.5758	26.44	7.5758	12.217	7.5701	31.777	7.5758	22.356	7.5758	11.499	7.5758	11.255	7.5758	15.1786	7.5758	17.749	7.5758	14.4692	7.5758	17.208	7.57536	20.0273	0.17	0.07	0.02
7.6659	14.738	7.6659	37.972	7.6659	30.099	7.6659	35.094	7.6659	11.718	7.6602	44.943	7.6659	21.545	7.6659	11.639	7.6659	15.194	7.6659	18.7639	7.6659	20.17	7.6659	14.8917	7.6659	16.729	7.66546	22.5767	0.19	0.09	0.02
7.7561	20.556	7.7561	34.724	7.7561	40.828	7.7561	35.572	7.7561	11.027	7.7504	25.472	7.7561	20.216	7.7561	11.473	7.7561	21.21	7.7561	19.442	7.7561	13.851	7.7561	8.8518	7.7561	18.648	7.75566	21.6824	0.19	0.08	0.02
7.8463	16.971	7.8463	31.054	7.8463	37.385	7.8463	35.999	7.8463	15.179	7.8405	39.167	7.8463	22.369	7.8463	16.879	7.8463	25.101	7.8463	28.1297	7.8463	9.36	7.8463	8.1706	7.8463	17.519	7.84585	23.3295	0.2	0.09	0.02
7.9365	11.519	7.9365	29.691	7.9365	44.431	7.9365	39.224	7.9365	17.116	7.9306	32.789	7.9365	17.409	7.9365	17.341	7.9365	15.154	7.9365	16.9929	7.9365	14.998	7.9365	10.5873	7.9365	13.197	7.93605	21.573	0.18	0.09	0.02
8.0267	12.214	8.0267	31.474	8.0267	39.577	8.0267	28.941	8.0267	13.91	8.0207	41.782	8.0267	23.877	8.0267	13.965	8.0267	9.85	8.0267	18.6561	8.0267	15.905	8.0267	14.9396	8.0267	13.595	8.02624	21.4374	0.18	0.09	0.02
8.1169	12.706	8.1169	32.106	8.1169	57.781	8.1169	36.928	8.1169	14.586	8.1108	41.013	8.1169	17.367	8.1169	12.168	8.1169	12.717	8.1169	14.9904	8.1169	13.562	8.1169	18.6876	8.1169	17.042	8.11643	23.2042	0.2	0.12	0.03
8.2071	20.381	8.2071	29.676	8.2071	47.655	8.2071	31.475	8.2071	18.415	8.201	35.553	8.2071	15.133	8.2071	10.994	8.2071	9.407	8.2071	13.7399	8.2071	13.894	8.2071	17.8585	8.2071	21.754	8.20663	21.995	0.19	0.09	0.02
8.2973	26.172	8.2973	26.174	8.2973	47.585	8.2973	20.911	8.2973	13.096	8.2911	33.255	8.2973	28.587	8.2973	9.288	8.2973	7.838	8.2973	13.1126	8.2973	21.301	8.2973	18.2844	8.2973	20.357	8.29682	21.997	0.19	0.09	0.02
8.3874	29.888	8.3874	24.326	8.3874	51.543	8.3874	23.967	8.3874	5.425	8.3812	31.82	8.3874	30.753	8.3874	14.054	8.3874	6.629	8.3874	17.0147	8.3874	26.928	8.3874	16.3815	8.3874	15.755	8.38692	22.6526	0.19	0.1	0.02
8.4776	25.43	8.4776	32.119	8.4776	44.52	8.4776	29.108	8.4776	14.185	8.4713	29.621	8.4776	33.038	8.4776	20.819	8.4776	11.216	8.4776	13.0188	8.4776	19.562	8.4776	9.8677	8.4776	14.876	8.47712	22.8754	0.2	0.09	0.02
8.5678	28.553	8.5678	40.125	8.5678	38.448	8.5678	26.142	8.5678	15.746	8.5614	37.41	8.5678	37.471	8.5678	13.922	8.5678	8.915	8.5678	16.7332	8.5678	18.08	8.5678	8.1127	8.5678	16.65	8.56731	23.5621	0.2	0.1	0.02
8.658	32.89	8.658	31.482	8.658	32.125	8.658	26.705	8.658	10.147	8.6516	31.958	8.658	26.883	8.658	19.656	8.658	13.096	8.658	14.6106	8.658	30.517	8.658	9.5068	8.658	19.214	8.65751	22.9839	0.2	0.07	0.02
8.7482	25.105	8.7482	28.959	8.7482	39.688	8.7482	31.794	8.7482	11.562	8.7417	37.012	8.7482	27.554	8.7482	10.427	8.7482	11.282	8.7482	11.7092	8.7482	26.848	8.7482	8.2792	8.7482	17.414	8.7477	22.1256	0.19	0.09	0.02
8.8384	26.76	8.8384	30.936	8.8384	40.588	8.8384	19.086	8.8384	17.456	8.8318	33.588	8.8384	29.228	8.8384	17.595	8.8384	8.009	8.8384	9.0842	8.8384	19.766	8.8384	7.3212	8.8384	18.078	8.83789	21.3458	0.18	0.08	0.02
8.9286	35.201	8.9286	31.387	8.9286	29.288	8.9286	26.406	8.9286	10.678	8.9219	38.516	8.9286	22.358	8.9286	22.96	8.9286	5.974	8.9286	6.5269	8.9286	21.492	8.9286	9.2899	8.9286	22.292	8.92808	21.7207	0.19	0.09	0.02
9.0188	45.786	9.0188	27.162	9.0188	26.56	9.0188	23.041	9.0188	7.705	9.012	38.678	9.0188	24.207	9.0188	21.658	9.0188	6.15	9.0188	8.0061	9.0188	23.659	9.0188	9.0129	9.0188	19.259	9.01828	21.6065	0.19	0.1	0.02
9.1089	57.344	9.1089	30.573	9.1089	26.126	9.1089	22.059	9.1089	20.442	9.1022	38.425	9.1089	15.949	9.1089	17.413	9.1089	12.267	9.1089	8.5941	9.1089	33.049	9.1089	9.106	9.1089	21.264	9.10838	24.047	0.21	0.11	0.03
9.1991	57.506	9.1991	32.579	9.1991	27.363	9.1991	15.635	9.1991	26.587	9.1923	57.967	9.1991	21.306	9.1991	19.76	9.1991	10.826	9.1991	9.6253	9.1991	29.313	9.1991	6.8908	9.1991	25.621	9.19858	26.2292	0.22	0.13	0.03
9.2893	44.64	9.2893	30.688	9.2893	24.109	9.2893	18.964	9.2893	21.779	9.2824	31.436	9.2893	15.643	9.2893	17.085	9.2893	5.535	9.2893	13.2798	9.2893	22.323	9.2893	10.1345	9.2893	18.508	9.28877	21.0865	0.18	0.08	0.02
9.3795	35.995	9.3795	25.419	9.3795	12.971	9.3795	20.533	9.3795	11.553	9.3725	59.905	9.3795	10.446	9.3795	14.524	9.3795	4.63	9.3795	9.6131	9.3795	16.217	9.3795	11.1474	9.3795	17.803	9.37896	19.289	0.17	0.12	0.03
9.4697	46.494	9.4697	31.25	9.4697	19.328	9.4697	22.605	9.4697	32.08	9.4626	35.771	9.4697	14.012	9.4697	23.91	9.4697	8.316	9.4697	9.0358	9.4697	15.579	9.4697	10.1183	9.4697	19.997	9.46915	22.192	0.19	0.09	0.02
9.5599	52.54	9.5599	29.72	9.5599	18.478	9.5599	18.641	9.5599	22.705	9.5528	35.327	9.5599	14.168	9.5599	24.41	9.5599	9.482	9.5599	7.2226	9.5599	15.254	9.5599	12.1194	9.5599	20.096	9.55935	21.551	0.18	0.1	0.02
9.6501	50.816	9.6501	32.127	9.6501	20.239	9.6501	18.782	9.6501	27.625	9.6429	40.181	9.6501	13.709	9.6501	22.246	9.6501	7.588	9.6501	7.8146	9.6501	21.179	9.6501	18.7519	9.6501	23.864	9.64955	23.4556	0.2	0.1	0.02
9.7403	48.162	9.7403	29.75	9.7403	22.125	9.7403	14.708	9.7403	35.992	9.733	50.111	9.7403	9.381	9.7403	25.572	9.7403	9.655	9.7403	8.7019	9.7403	19.703	9.7403	9.7469	9.7403	17.672	9.73974	23.1754	0.2	0.12	0.03
9.8304	44.982	9.8304	25.646	9.8304	21.297	9.8304	21.565	9.8304	25.809	9.8231	40.114	9.8304	9.311	9.8304	26.93	9.8304	8.896	9.8304	10.9928	9.8304	13.066	9.8304	7.7587	9.8304	15.849	9.82984	20.9397	0.18	0.1	0.02
9.9206	48.727	9.9206	31.355	9.9206	22.364	9.9206	24.542	9.9206	17.097	9.9132	51.003	9.9206	9.117	9.9206	23.741	9.9206	9.421	9.9206	9.6552	9.9206	9.488	9.9206	19.0455	9.9206	17.646	9.92003	22.554	0.19	0.11	0.03
10.0108	46.362	10.0108	26.768	10.0108	22.659	10.0108	23.78	10.0108	20.574	10.0034	60.528	10.0108	10.431	10.0108	26.043	10.0108	2.62	10.0108	11.5346	10.0108	12.077	10.0108	31.2493	10.0108	17.487	10.0102	24.0087	0.21	0.13	0.03
10.101	46.592	10.101	24.543	10.101	24.546	10.101	23.631	10.101	26.287	10.0935	44.832	10.101	8.623	10.101	22.238	10.101	4.831	10.101	12.2329	10.101	5.927	10.101	34.3478	10.101	16.071	10.1004	22.6694	0.19	0.11	0.03
10.1912	38.587	10.1912	31.929	10.1912	25.164	10.1912	25.92	10.1912	17.823	10.1836	43.82	10.1912	9.664	10.1912	18.535	10.1912	14.046	10.1912	11.217	10.1912	14.943	10.1912	26.0204	10.1912	13.852	10.1906	22.4246	0.19	0.09	0.02
10.2814	38.101	10.2814	21.352	10.2814	27.645	10.2814	22.587	10.2814	22.843	10.2737	45.438	10.2814	14.431	10.2814	16.602	10.2814	18.06	10.2814	13.1496	10.2814	13.936	10.2814	18.1239	10.2814	14.43	10.2808	22.0537	0.19	0.08	0.02
10.3716	31.392	10.3716	15.607	10.3716	23.441	10.3716	21.99	10.3716	17.751	10.3638	46.804	10.3716	11.943	10.3716	12.66	10.3716	9.054	10.3716	11.4799	10.3716	13.205	10.3716	58.492	10.3716	12.534	10.371	22.0271	0.19	0.12	0.03
10.4618	36.463	10.4618	23.256	10.4618	26.378	10.4618	21.473	10.4618	12.897	10.454	51.756	10.4618	10.862	10.4618	7.69	10.4618	7.613	10.4618	18.6837	10.4618	18.458	10.4618	54.3192	10.4618	12.538	10.4612	23.2605	0.2	0.13	0.03
10.5519	44.07	10.5519	33.085	10.5519	25.484	10.5519	13.723	10.5519	15.235	10.5441	44.592	10.5519	13.854	10.5519	12.114	10.5519	7.634	10.5519	18.8807	10.5519	16.017	10.5519	58.1937	10.5519	14.916	10.5513	24.446	0.21	0.13	0.03
10.6421	32.797	10.6421	29.355	10.6421	17.819	10.6421	16.065	10.6421	12.368	10.6342	34.632	10.6421	12.867	10.6421	1.441	10.6421	6.007	10.6421	14.032	10.6421	10.313	10.6421	44.4274	10.6421	15.803	10.6415	19.0713	0.16	0.1	0.02
10.7323	36.196	10.7323	34.865	10.7323	26.174	10.7323	19.564	10.7323	16.429	10.7243	31.722	10.7323	8.051	10.7323	14.879	10.7323	6.929	10.7323	9.7139	10.7323	11.989	10.7323	33.6645	10.7323	15.696	10.7317	20.4517	0.18	0.09	0.02
10.8225	40.393	10.8225	38.933	10.8225	24.546	10.8225	23.9	10.8225	20.602	10.8144	33.101	10.8225	9.271	10.8225	15.135	10.8225	7.738	10.8225	8.4759	10.8225	14.802	10.8225	23.6552	10.8225	19.17	10.8219	21.5171	0.18	0.09	0.02
10.9127	41.098	10.9127	50.592	10.9127	15.687	10.9127	24.21	10.9127	13.653	10.9046	45.096	10.9127	13.659	10.9127	15.571	10.9127	8.459	10.9127	8.2462	10.9127	24.572	10.9127	32.2186	10.9127	19.907	10.9121	24.0745	0.21	0.12	0.03
11.0029	40.256	11.0029	45.533	11.0029	20.522	11.0029	26.715	11.0029	14.24	10.9947	51.23	11.0029	13.849	11.0029	19.967	11.0029	4.802	11.0029	8.6057	11.0029	21.329	11.0029	33.0661	11.0029	17.82	11.0023	24.4565	0.21	0.12	0.03
11.0931	43.387	11.0931	43.79	11.0931	19.582	11.0931	23.389	11.0931	11.097	11.0848	51.797	11.0931	5.842	11.0931	24.818	11.0931	9.798	11.0931	12.8587	11.0931	21.159	11.0931	25.6441	11.0931	15.662	11.0925	23.7557	0.2	0.12	0.03
11.1833	41.527	11.1833	39.951	11.1833	28.058	11.1833	20.378	11.1833	8.503	11.1749	50.249	11.1833	5.24	11.1833	16.731	11.1833	6.776	11.1833	13.029	11.1833	14.962	11.1833	38.8451	11.1833	15.916	11.1827	23.0896	0.2	0.12	0.03
11.2734	36.849	11.2734	42.208	11.2734	25.493	11.2734	17.363	11.2734	6.713	11.265	48.028	11.2734	5.989	11.2734	20.11	11.2734	11.829	11.2734	9.9064	11.2734	14.105	11.2734	42.7718	11.2734	17.114	11.2728	22.9599	0.2	0.12	0.03
11.3636	43.833	11.3636	38.454	11.3636	28.03	11.3636	14.813	11.3636	6.849	11.3552	49.733	11.3636	10.718	11.3636	14.939	11.3636	5.843	11.3636	7.1148	11.3636	15.384	11.3636	44.645	11.3636	14.046	11.363	22.6463	0.19	0.13	0.03
11.4538	36.88	11.4538	34.634	11.4538	34.693	11.4538	19.696	11.4538	8.915	11.4453	53.056	11.4538	3.32	11.4538	11.689	11.4538	11.715	11.4538	12.2994	11.4538	22.1	11.4538	32.0955	11.4538	15.001	11.4531	22.7765	0.2	0.12	0.03
11.544	29.894	11.544	30.387	11.544	17.212	11.544	13.485	11.544	8.994	11.5354	56.24	11.544	5.545	11.544	16.633	11.544	11.927	11.544	13.1867	11.544	17.163	11.544	39.5053	11.544	14.284	11.5433	21.112	0.18	0.12	0.03
11.6342	34.083	11.6342	36.19	11.6342	26.483	11.6342	20.245	11.6342	9.408	11.6255	47.257	11.6342	5.372	11.6342	17.576	11.6342	10.988	11.6342	16.0399	11.6342	12.639	11.6342	21.0915	11.6342	11.476	11.6335	20.6806	0.18	0.1	0.02
11.7244	29.207	11.7244	44.501	11.7244	18.549	11.7244	18.823	11.7244	4.083	11.7157	51.401	11.7244	9.605	11.7244	18.381	11.7244	10.103	11.7244	13.634	11.7244	27.163	11.7244	29.2492	11.7244	10.589	11.7237	21.9452	0.19	0.12	0.03
11.8146	31.041	11.8146	34.871	11.8146	11.931	11.8146	28.017	11.8146	4.974	11.8058	49.773	11.8146	7.128	11.8146	20.958	11.8146	2.621	11.8146	11.5032	11.8146	22.471	11.8146	33.8032	11.8146	9.599	11.8139	20.6685	0.18	0.12	0.03
11.9048	36.555	11.9048	32.302	11.9048	15.805	11.9048	31.894	11.9048	10.643	11.8959	48.031	11.9048	7.042	11.9048	16.246	11.9048	5.977	11.9048	11.2146	11.9048	11.559	11.9048	19.3084	11.9048	11.681	11.9041	19.866	0.17	0.11	0.03
11.9949	33.948	11.9949	35.989	11.9949	18.852	11.9949	22.104	11.9949	8.355	11.986	44.838	11.9949	12.365	11.9949	10.544	11.9949	9.686	11.9949	8.0534	11.9949	17.924	11.9949	30.3187	11.9949	14.518	11.9942	20.5765	0.18	0.1	0.02
12.0851	23.8	12.0851	29.104	12.0851	20.166	12.0851	14.343	12.0851	6.566	12.0761	47.145	12.0851	2.277	12.0851	12.912	12.0851	6.084	12.0851	7.7009	12.0851	16.484	12.0851	13.378	12.0851	14.616	12.0844	16.5058	0.14	0.1	0.02
12.1753	29.372	12.1753	33.778	12.1753	19.183	12.1753	15.055	12.1753	8.439	12.1663	44.939	12.1753	4.011	12.1753	14.496	12.1753	6.662	12.1753	9.7832	12.1753	17.171	12.1753	16.3028	12.1753	14.281	12.1746	17.9595	0.15	0.1	0.02
12.2655	21.571	12.2655	28.589	12.2655	16.633	12.2655	12.973	12.2655	7.4	12.2564	36.569	12.2655	16.87	12.2655	16.636	12.2655	0.646	12.2655	7.9026	12.2655	14.964	12.2655	17.7627	12.2655	16.05	12.2648	16.5051	0.14	0.08	0.02
12.3557	19.188	12.3557	32.906	12.3557	18.568	12.3557	10.025	12.3557	11.675	12.3465	36.786	12.3557	8.915	12.3557	9.413	12.3557	0.072	12.3557	9.7666	12.3557	13.937	12.3557	26.7895	12.3557	15.043	12.355	16.3911	0.14	0.09	0.02
12.4459	16.93	12.4459	24.852	12.4459	24.379	12.4459	14.711	12.4459	13.781	12.4366	49.474	12.4459	6.046	12.4459	17.216	12.4459	6.751	12.4459	10.3811	12.4459	16.375	12.4459	27.4238	12.4459	13.417	12.4452	18.5951	0.16	0.09	0.02
12.5361	22.974	12.5361	33.515	12.5361	23.55	12.5361	10.101	12.5361	11.382	12.5267	37.141	12.5361	11.776	12.5361	13.059	12.5361	6.114	12.5361	12.2561	12.5361	17.733	12.5361	31.6768	12.5361	19.037	12.5354	19.255	0.16	0.08	0.02
12.6263	20.01	12.6263	35.966	12.6263	21.528	12.6263	18.96	12.6263	7.131	12.6169	38.606	12.6263	7.684	12.6263	13.378	12.6263	9.225	12.6263	13.831	12.6263	13.544	12.6263	31.1687	12.6263	16.284	12.6256	19.0243	0.16	0.09	0.02
12.7164	20.121	12.7164	18.513	12.7164	26.793	12.7164	16.218	12.7164	9.973	12.707	44.203	12.7164	10.406	12.7164	7.805	12.7164	8.403	12.7164	8.0202	12.7164	14.279	12.7164	19.6551	12.7164	8.586	12.7157	16.3827	0.14	0.08	0.02
12.8066	21.774	12.8066	26.153	12.8066	19.704	12.8066	12.793	12.8066	4.186	12.7971	37.132	12.8066	9.654	12.8066	8.31	12.8066	3.323	12.8066	11.0876	12.8066	9.562	12.8066	28.3267	12.8066	9.921	12.8059	15.5328	0.13	0.08	0.02
12.8968	28.2	12.8968	31.989	12.8968	27.441	12.8968	13.474	12.8968	8.454	12.8872	42.556	12.8968	10.07	12.8968	12.657	12.8968	9.926	12.8968	15.7025	12.8968	6.619	12.8968	21.631	12.8968	15.235	12.8961	18.7657	0.16	0.09	0.02
12.987	28.17	12.987	42.108	12.987	24.609	12.987	18.77	12.987	11.941	12.9773	40.292	12.987	13.744	12.987	22.097	12.987	6.447	12.987	10.4242	12.987	16.418	12.987	18.4711	12.987	15.472	12.9863	20.6895	0.18	0.09	0.02
13.0772	16.723	13.0772	30.693	13.0772	21.717	13.0772	15.549	13.0772	6.275	13.0675	31.512	13.0772	11.024	13.0772	9.324	13.0772	4.236	13.0772	7.1282	13.0772	11.515	13.0772	23.9311	13.0772	9.716	13.0765	15.3341	0.13	0.07	0.02
13.1674	20.027	13.1674	37.687	13.1674	24.538	13.1674	13.234	13.1674	8.383	13.1576	50.652	13.1674	10.729	13.1674	14.727	13.1674	4.298	13.1674	14.5116	13.1674	14.389	13.1674	20.9852	13.1674	10.839	13.1666	18.8461	0.16	0.1	0.02
13.2576	23.937	13.2576	34.479	13.2576	16.158	13.2576	16.921	13.2576	9.799	13.2477	40.736	13.2576	10.967	13.2576	16.506	13.2576	12.068	13.2576	17.1192	13.2576	15.574	13.2576	12.5223	13.2576	12.177	13.2568	18.3818	0.16	0.08	0.02
13.3478	23.955	13.3478	38.361	13.3478	17.297	13.3478	17.774	13.3478	7.872	13.3378	47.772	13.3478	11.045	13.3478	19.22	13.3478	14.249	13.3478	14.1337	13.3478	13.864	13.3478	9.2253	13.3478	12.639	13.347	19.0313	0.16	0.1	0.02
13.438	20.629	13.438	33.019	13.438	7.832	13.438	17.597	13.438	9.585	13.4279	51.561	13.438	13.191	13.438	16.847	13.438	8.986	13.438	10.0921	13.438	16.439	13.438	16.1602	13.438	11.439	13.4372	17.9521	0.15	0.1	0.02
13.5281	24.129	13.5281	36.931	13.5281	20.792	13.5281	11.935	13.5281	8.749	13.5181	55.459	13.5281	11.335	13.5281	15.105	13.5281	8.888	13.5281	8.747	13.5281	19.861	13.5281	19.6915	13.5281	8.378	13.5273	19.2308	0.16	0.11	0.03
13.6183	25.271	13.6183	44.828	13.6183	22.255	13.6183	15.818	13.6183	9.247	13.6082	56.939	13.6183	7.464	13.6183	16.738	13.6183	12.518	13.6183	6.5008	13.6183	21.483	13.6183	23.9517	13.6183	10.578	13.6175	21.0455	0.18	0.12	0.03
13.7085	22.815	13.7085	39.578	13.7085	24.24	13.7085	17.319	13.7085	5.873	13.6983	52.899	13.7085	11.28	13.7085	8.385	13.7085	9.027	13.7085	7.4393	13.7085	19.729	13.7085	16.4596	13.7085	8.179	13.7077	18.7095	0.16	0.11	0.03
13.7987	22.185	13.7987	26.244	13.7987	24.159	13.7987	16.559	13.7987	8.201	13.7884	46.211	13.7987	12.123	13.7987	18.002	13.7987	5.787	13.7987	11.7847	13.7987	11.139	13.7987	23.0982	13.7987	7.234	13.7979	17.9021	0.15	0.09	0.02
13.8889	19.455	13.8889	32.919	13.8889	23.569	13.8889	19.039	13.8889	10.068	13.8785	46.243	13.8889	15.997	13.8889	13.085	13.8889	5.733	13.8889	15.4643	13.8889	9.765	13.8889	18.6048	13.8889	11.024	13.8881	18.5359	0.16	0.09	0.02
13.9791	23.959	13.9791	41.203	13.9791	22.686	13.9791	12.281	13.9791	9.622	13.9687	56.323	13.9791	18.774	13.9791	16.597	13.9791	6.648	13.9791	8.7483	13.9791	11.839	13.9791	17.1794	13.9791	13.662	13.9783	19.9632	0.17	0.12	0.03
14.0693	23.991	14.0693	39.467	14.0693	16.455	14.0693	15.885	14.0693	11.756	14.0588	51.591	14.0693	18.682	14.0693	16.607	14.0693	7.444	14.0693	5.2796	14.0693	7.708	14.0693	14.682	14.0693	13.883	14.0685	18.7254	0.16	0.11	0.03
14.1595	22.948	14.1595	39.868	14.1595	26.227	14.1595	15.827	14.1595	11.694	14.1489	53.843	14.1595	17.801	14.1595	23.848	14.1595	9.467	14.1595	10.6883	14.1595	8.177	14.1595	9.8331	14.1595	14.206	14.1587	20.3406	0.17	0.11	0.03
14.2496	35.559	14.2496	32.787	14.2496	32.275	14.2496	14.292	14.2496	12.688	14.239	46.085	14.2496	20.562	14.2496	25.151	14.2496	8.574	14.2496	12.1872	14.2496	12.294	14.2496	12.4599	14.2496	16.391	14.2488	21.6389	0.19	0.1	0.02
14.3398	29.167	14.3398	54.052	14.3398	22.705	14.3398	14.586	14.3398	15.186	14.3291	45.026	14.3398	19.876	14.3398	17.37	14.3398	8.104	14.3398	7.4674	14.3398	13.55	14.3398	16.0056	14.3398	15.981	14.339	21.4674	0.18	0.11	0.03
14.43	30.732	14.43	61.13	14.43	27.88	14.43	13.714	14.43	12.779	14.4193	37.088	14.43	15.08	14.43	14.119	14.43	8.608	14.43	9.9693	14.43	10.566	14.43	16.3593	14.43	8.525	14.4292	20.5038	0.18	0.13	0.03
14.5202	39.626	14.5202	49.06	14.5202	25.032	14.5202	22.239	14.5202	9.888	14.5094	58.055	14.5202	14.461	14.5202	20.364	14.5202	6.705	14.5202	12.1115	14.5202	11.384	14.5202	22.2842	14.5202	13.536	14.5194	23.442	0.2	0.13	0.03
14.6104	37.549	14.6104	32.191	14.6104	31.671	14.6104	22.698	14.6104	13.84	14.5995	42.627	14.6104	12.53	14.6104	12.91	14.6104	8.88	14.6104	10.813	14.6104	12.077	14.6104	20.288	14.6104	16.943	14.6096	21.1552	0.18	0.09	0.02
14.7006	30.059	14.7006	39.814	14.7006	25.785	14.7006	28.895	14.7006	9.851	14.6896	45.495	14.7006	15.642	14.7006	20.336	14.7006	16.183	14.7006	14.5603	14.7006	11.806	14.7006	27.4014	14.7006	11.621	14.6998	22.8807	0.2	0.09	0.02
14.7908	29.663	14.7908	36.752	14.7908	26.367	14.7908	29.426	14.7908	7.03	14.7797	66.273	14.7908	20.374	14.7908	20.214	14.7908	18.173	14.7908	11.7816	14.7908	11.636	14.7908	20.2991	14.7908	13.581	14.7899	23.9669	0.21	0.13	0.03
14.881	37.783	14.881	32.831	14.881	26.69	14.881	45.304	14.881	14.2	14.8699	59.579	14.881	18.3	14.881	17.908	14.881	14.924	14.881	8.4018	14.881	15.036	14.881	21.1845	14.881	16.368	14.8801	25.2699	0.22	0.12	0.03
14.9711	41.735	14.9711	28.869	14.9711	31.604	14.9711	43.069	14.9711	15.741	14.96	69.62	14.9711	15.358	14.9711	8.091	14.9711	15.629	14.9711	7.5394	14.9711	15.428	14.9711	18.4414	14.9711	16.697	14.9702	25.2171	0.22	0.14	0.03
15.0613	45.274	15.0613	30.051	15.0613	28.236	15.0613	33.51	15.0613	9.256	15.0501	68.033	15.0613	16.182	15.0613	9.691	15.0613	16.248	15.0613	7.2228	15.0613	17.804	15.0613	22.1992	15.0613	13.298	15.0604	24.385	0.21	0.14	0.03
15.1515	45.388	15.1515	24.477	15.1515	27.578	15.1515	29.821	15.1515	6.168	15.1402	65.438	15.1515	14.121	15.1515	15.612	15.1515	10.935	15.1515	10.8456	15.1515	12.809	15.1515	19.0807	15.1515	12.953	15.1506	22.7097	0.19	0.14	0.03
15.2417	42.229	15.2417	29.631	15.2417	30.96	15.2417	33.245	15.2417	10.341	15.2303	41.306	15.2417	15.952	15.2417	13.074	15.2417	5.88	15.2417	11.3024	15.2417	12.564	15.2417	17.6436	15.2417	13.892	15.2408	21.3862	0.18	0.1	0.02
15.3319	57.428	15.3319	30.11	15.3319	43.471	15.3319	18.936	15.3319	9.216	15.3205	33.94	15.3319	22.491	15.3319	14.765	15.3319	8.283	15.3319	6.642	15.3319	16.403	15.3319	16.4066	15.3319	16.283	15.331	22.6442	0.19	0.12	0.03
15.4221	49.744	15.4221	29.7	15.4221	47.404	15.4221	21.306	15.4221	10.164	15.4106	25.826	15.4221	27.249	15.4221	11.727	15.4221	17.377	15.4221	10.594	15.4221	19.158	15.4221	21.4613	15.4221	11.671	15.4212	23.337	0.2	0.11	0.03
15.5123	45.638	15.5123	41.31	15.5123	52.212	15.5123	26.028	15.5123	15.939	15.5007	36.24	15.5123	18.138	15.5123	13.753	15.5123	12.723	15.5123	15.7785	15.5123	21.512	15.5123	13.8814	15.5123	4.151	15.5114	24.408	0.21	0.12	0.03
15.6025	53.42	15.6025	31.01	15.6025	44.588	15.6025	15.612	15.6025	14.774	15.5908	30.835	15.6025	20.998	15.6025	9.312	15.6025	14.195	15.6025	11.1336	15.6025	26.07	15.6025	19.0505	15.6025	3.271	15.6016	22.6361	0.19	0.12	0.03
15.6926	46.969	15.6926	23.891	15.6926	53.2	15.6926	16.657	15.6926	19.291	15.6809	40.251	15.6926	20.572	15.6926	5.661	15.6926	12.78	15.6926	14.1179	15.6926	27.826	15.6926	18.6912	15.6926	4.663	15.6917	23.4285	0.2	0.12	0.03
15.7828	49.47	15.7828	24.253	15.7828	53.4	15.7828	16.204	15.7828	8.101	15.7711	43.834	15.7828	15.583	15.7828	10.414	15.7828	11.304	15.7828	13.5141	15.7828	31.009	15.7828	19.5813	15.7828	9.07	15.7819	23.5183	0.2	0.13	0.03
15.873	49.952	15.873	18.26	15.873	44.06	15.873	13.52	15.873	9.917	15.8612	46.172	15.873	17.063	15.873	9.431	15.873	14.446	15.873	14.5188	15.873	29.515	15.873	12.9821	15.873	12.177	15.8721	22.4626	0.19	0.12	0.03
15.9632	41.461	15.9632	17.956	15.9632	39.02	15.9632	17.355	15.9632	14.433	15.9513	56.457	15.9632	17.891	15.9632	21.946	15.9632	22.501	15.9632	16.541	15.9632	17.675	15.9632	16.0833	15.9632	11.212	15.9623	23.887	0.2	0.11	0.03
16.0534	29.901	16.0534	18.162	16.0534	36.02	16.0534	19.737	16.0534	17.915	16.0414	59.825	16.0534	26.385	16.0534	18.845	16.0534	19.15	16.0534	24.0609	16.0534	13.225	16.0534	21.3692	16.0534	6.526	16.0525	23.9324	0.21	0.11	0.03
16.1436	31.056	16.1436	19.187	16.1436	25.1	16.1436	23.827	16.1436	12.145	16.1315	58.154	16.1436	25.766	16.1436	6.26	16.1436	17.117	16.1436	27.0863	16.1436	18.184	16.1436	17.2924	16.1436	7.259	16.1427	22.1872	0.19	0.11	0.03
16.2338	36.141	16.2338	17.174	16.2338	15.38	16.2338	25.439	16.2338	16.982	16.2217	48.874	16.2338	23.644	16.2338	10.718	16.2338	12.006	16.2338	26.8575	16.2338	17.012	16.2338	17.2228	16.2338	10.359	16.2329	21.3699	0.18	0.09	0.02
16.324	38.104	16.324	33.085	16.324	13.66	16.324	9.13	16.324	18.009	16.3118	44.42	16.324	26.168	16.324	5.637	16.324	5.648	16.324	24.0031	16.324	12.239	16.324	21.3871	16.324	8.576	16.3231	20.0051	0.17	0.1	0.02
16.4141	33.833	16.4141	21.658	16.4141	14.66	16.4141	19.982	16.4141	15.221	16.4019	26.815	16.4141	28.858	16.4141	15.601	16.4141	3.65	16.4141	17.6838	16.4141	12.541	16.4141	22.3457	16.4141	9.052	16.4132	18.6077	0.16	0.07	0.02
16.5043	23.477	16.5043	25.993	16.5043	15.66	16.5043	20.622	16.5043	17.278	16.492	32.449	16.5043	23.677	16.5043	21.446	16.5043	4.227	16.5043	18.2239	16.5043	17.227	16.5043	18.2386	16.5043	5.279	16.5034	18.7537	0.16	0.06	0.02
16.5945	23.984	16.5945	28.149	16.5945	18.64	16.5945	23.482	16.5945	21.763	16.5822	33.602	16.5945	10.891	16.5945	18.103	16.5945	6.545	16.5945	21.3463	16.5945	16.131	16.5945	11.2078	16.5945	6.391	16.5936	18.4796	0.16	0.07	0.02
16.6847	27.736	16.6847	30.43	16.6847	14.06	16.6847	22.533	16.6847	21.445	16.6723	35.205	16.6847	12.694	16.6847	13.067	16.6847	5.278	16.6847	14.6039	16.6847	6.958	16.6847	11.6832	16.6847	10.923	16.6837	17.432	0.15	0.08	0.02
16.7749	21.251	16.7749	30.303	16.7749	17.6	16.7749	18.177	16.7749	17.911	16.7624	35.336	16.7749	20.383	16.7749	13.597	16.7749	7.994	16.7749	14.8979	16.7749	12.916	16.7749	17.078	16.7749	11.247	16.7739	18.3608	0.16	0.06	0.02
16.8651	27.923	16.8651	32.9	16.8651	17.7	16.8651	21.827	16.8651	15.65	16.8525	28.714	16.8651	29.181	16.8651	15.509	16.8651	11.275	16.8651	22.8741	16.8651	13.577	16.8651	19.0295	16.8651	13.033	16.8641	20.7071	0.18	0.06	0.02
16.9553	26.681	16.9553	33.876	16.9553	20.62	16.9553	31.193	16.9553	25.823	16.9426	37.776	16.9553	37.811	16.9553	20.283	16.9553	10.767	16.9553	13.4648	16.9553	11.166	16.9553	17.6315	16.9553	14.561	16.9543	23.2041	0.2	0.08	0.02
17.0455	20.8	17.0455	34.652	17.0455	19.7	17.0455	17.344	17.0455	29.539	17.0328	27.399	17.0455	48.582	17.0455	16.356	17.0455	10.666	17.0455	12.7042	17.0455	7.1	17.0455	15.3669	17.0455	5.629	17.0445	20.4491	0.18	0.1	0.02
17.1356	16.591	17.1356	39.857	17.1356	14.7	17.1356	19.763	17.1356	23.632	17.1229	17.463	17.1356	55.332	17.1356	18.418	17.1356	8.963	17.1356	12.0067	17.1356	8.238	17.1356	18.6183	17.1356	2.543	17.1346	19.7019	0.17	0.11	0.03
17.2258	21.332	17.2258	22.972	17.2258	17.62	17.2258	20.109	17.2258	21.835	17.213	20.96	17.2258	46.445	17.2258	16.524	17.2258	9.723	17.2258	9.5138	17.2258	10.455	17.2258	23.1338	17.2258	11.731	17.2248	19.4118	0.17	0.08	0.02
17.316	27.355	17.316	33.105	17.316	15.38	17.316	22.464	17.316	18.132	17.3031	28.379	17.316	34.548	17.316	15.589	17.316	8.601	17.316	9.2273	17.316	7.355	17.316	21.4304	17.316	7.951	17.315	19.1936	0.16	0.08	0.02
17.4062	25.174	17.4062	38.914	17.4062	14.98	17.4062	26.738	17.4062	18.212	17.3932	20.297	17.4062	18.482	17.4062	12.311	17.4062	8.3	17.4062	14.7851	17.4062	8.917	17.4062	17.0132	17.4062	9.123	17.4052	17.942	0.15	0.07	0.02
17.4964	24.062	17.4964	31.024	17.4964	14.68	17.4964	23.335	17.4964	10.158	17.4834	22.855	17.4964	12.854	17.4964	15.14	17.4964	10.754	17.4964	11.1244	17.4964	17.579	17.4964	19.267	17.4964	10.734	17.4954	17.1974	0.15	0.05	0.02
17.5866	23.712	17.5866	30.344	17.5866	16.64	17.5866	17.263	17.5866	15.049	17.5735	25.692	17.5866	17.331	17.5866	14.526	17.5866	7.48	17.5866	7.2716	17.5866	7.775	17.5866	17.5266	17.5866	9.46	17.5856	16.1592	0.14	0.06	0.02
17.6768	20.004	17.6768	26.615	17.6768	26.58	17.6768	19.683	17.6768	15.636	17.6636	23.679	17.6768	20.654	17.6768	11.356	17.6768	9.018	17.6768	10.2746	17.6768	8.447	17.6768	19.2635	17.6768	12.934	17.6758	17.2419	0.15	0.05	0.02
17.767	13.457	17.767	31.86	17.767	17.8	17.767	19.2	17.767	11.422	17.7537	25.39	17.767	19.379	17.767	12.349	17.767	12.265	17.767	6.8902	17.767	11.63	17.767	34.5086	17.767	12.107	17.766	17.5583	0.15	0.07	0.02
17.8571	28.771	17.8571	19.986	17.8571	7.7	17.8571	19.88	17.8571	10.965	17.8438	31.772	17.8571	13.052	17.8571	15.651	17.8571	8.835	17.8571	11.2715	17.8571	7.474	17.8571	25.9594	17.8571	14.097	17.8561	16.5703	0.14	0.07	0.02
17.9473	22.139	17.9473	21.139	17.9473	15.24	17.9473	16.052	17.9473	10.597	17.934	38.835	17.9473	17.028	17.9473	14.823	17.9473	8.896	17.9473	6.3296	17.9473	8.809	17.9473	23.055	17.9473	12.299	17.9463	16.557	0.14	0.07	0.02
18.0375	22.379	18.0375	28.968	18.0375	12.74	18.0375	7.937	18.0375	8.991	18.0241	33.844	18.0375	12.283	18.0375	14.137	18.0375	9.908	18.0375	8.3467	18.0375	8.383	18.0375	29.9726	18.0375	9.473	18.0365	15.9509	0.14	0.08	0.02
18.1277	20.707	18.1277	35.659	18.1277	9	18.1277	14.526	18.1277	11.946	18.1142	29.583	18.1277	14.473	18.1277	15.185	18.1277	10.602	18.1277	13.6412	18.1277	8.619	18.1277	37.9731	18.1277	9.797	18.1267	17.8239	0.15	0.08	0.02
18.2179	15.789	18.2179	24.084	18.2179	9	18.2179	14.66	18.2179	7.933	18.2043	39.725	18.2179	22.072	18.2179	12.566	18.2179	7.443	18.2179	5.4731	18.2179	7.788	18.2179	29.8802	18.2179	8.188	18.2169	15.7386	0.13	0.09	0.02
18.3081	13.196	18.3081	22.986	18.3081	10.32	18.3081	22.571	18.3081	7.568	18.2944	42.11	18.3081	12.02	18.3081	10.461	18.3081	8.366	18.3081	8.5659	18.3081	6.875	18.3081	20.3407	18.3081	10.137	18.307	15.0397	0.13	0.08	0.02
18.3983	11.699	18.3983	26	18.3983	16.94	18.3983	32.195	18.3983	8.409	18.3846	38.046	18.3983	10.233	18.3983	11.485	18.3983	8.91	18.3983	8.2219	18.3983	7.805	18.3983	29.2657	18.3983	10.868	18.3972	16.929	0.15	0.09	0.02
18.4885	31.852	18.4885	25.165	18.4885	15.38	18.4885	33.617	18.4885	10.685	18.4747	31.023	18.4885	16.917	18.4885	11.89	18.4885	7.035	18.4885	21.8877	18.4885	11.593	18.4885	21.9371	18.4885	7.854	18.4874	18.9874	0.16	0.08	0.02
18.5786	21.166	18.5786	26.981	18.5786	14.98	18.5786	18.585	18.5786	7.708	18.5648	22.924	18.5786	14.552	18.5786	12.916	18.5786	10.423	18.5786	13.4226	18.5786	6.336	18.5786	23.135	18.5786	10.998	18.5775	15.702	0.13	0.05	0.02
18.6688	12.388	18.6688	24.617	18.6688	12.7	18.6688	16.65	18.6688	4.261	18.6549	22.87	18.6688	12.62	18.6688	9.894	18.6688	11.13	18.6688	8.2312	18.6688	7.402	18.6688	22.0799	18.6688	20.509	18.6677	14.2579	0.12	0.05	0.02
18.759	21.108	18.759	16.021	18.759	9.68	18.759	15.433	18.759	7.522	18.745	28.831	18.759	14.148	18.759	9.176	18.759	11.877	18.759	12.5994	18.759	4.797	18.759	22.1486	18.759	15.744	18.7579	14.545	0.12	0.05	0.02
18.8492	10.578	18.8492	22.523	18.8492	22.077	18.8492	20.669	18.8492	8.857	18.8352	25.959	18.8492	15.405	18.8492	9.311	18.8492	7.472	18.8492	10.8936	18.8492	10.214	18.8492	31.5418	18.8492	9.999	18.8481	15.8076	0.14	0.06	0.02
18.9394	12.887	18.9394	23.347	18.9394	20.775	18.9394	18.825	18.9394	8.918	18.9253	31.055	18.9394	21.441	18.9394	11.529	18.9394	7.839	18.9394	16.5907	18.9394	7.264	18.9394	20.1999	18.9394	15.596	18.9383	16.6359	0.14	0.06	0.02
19.0296	11.047	19.0296	30.177	19.0296	15.889	19.0296	20.066	19.0296	5.873	19.0154	30.636	19.0296	19.767	19.0296	10.421	19.0296	7.871	19.0296	11.9231	19.0296	7.395	19.0296	20.1561	19.0296	15.125	19.0285	15.8728	0.14	0.07	0.02
19.1198	13.078	19.1198	24.298	19.1198	21.195	19.1198	27.111	19.1198	8.979	19.1055	39.14	19.1198	16.201	19.1198	6.568	19.1198	5.496	19.1198	8.6201	19.1198	11.405	19.1198	13.3421	19.1198	14.884	19.1187	16.1782	0.14	0.08	0.02
19.21	21.476	19.21	25.158	19.21	21.158	19.21	18.943	19.21	11.623	19.1956	41.256	19.21	13.22	19.21	10.996	19.21	10.832	19.21	14.4769	19.21	6.701	19.21	22.5327	19.21	15.325	19.2089	17.9767	0.15	0.07	0.02
19.3001	14.541	19.3001	19.949	19.3001	20.244	19.3001	16.914	19.3001	10.2	19.2858	31.611	19.3001	16.752	19.3001	10.418	19.3001	10.143	19.3001	11.8532	19.3001	1.971	19.3001	15.7805	19.3001	14.418	19.299	14.9842	0.13	0.06	0.02
19.3903	11.172	19.3903	35.713	19.3903	19.187	19.3903	20.719	19.3903	10.857	19.3759	36.175	19.3903	8.982	19.3903	13.612	19.3903	8.168	19.3903	12.7154	19.3903	2.234	19.3903	12.8843	19.3903	13.897	19.3892	15.8704	0.14	0.08	0.02
19.4805	9.966	19.4805	22.546	19.4805	20.466	19.4805	15.661	19.4805	8.641	19.466	27.246	19.4805	14.505	19.4805	15.434	19.4805	8	19.4805	19.4404	19.4805	13.267	19.4805	15.9903	19.4805	8.113	19.4794	15.3289	0.13	0.05	0.02
19.5707	20.666	19.5707	24.396	19.5707	21.286	19.5707	21.936	19.5707	9.233	19.5561	25.201	19.5707	14.199	19.5707	9.261	19.5707	5.258	19.5707	19.2199	19.5707	5.678	19.5707	14.0496	19.5707	9.603	19.5696	15.3836	0.13	0.06	0.02
19.6609	19.031	19.6609	17.77	19.6609	17.887	19.6609	24.883	19.6609	13.12	19.6462	16.946	19.6609	14.253	19.6609	9.102	19.6609	6.209	19.6609	18.7795	19.6609	9.754	19.6609	11.4468	19.6609	11.908	19.6598	14.6992	0.13	0.04	0.02
19.7511	20.691	19.7511	17.184	19.7511	15.629	19.7511	20.902	19.7511	10.368	19.7364	14.028	19.7511	18.231	19.7511	7.282	19.7511	7.189	19.7511	15.2699	19.7511	7.791	19.7511	12.1426	19.7511	13.226	19.75	13.841	0.12	0.04	0.02
19.8413	30.87	19.8413	17.287	19.8413	15.436	19.8413	19.839	19.8413	8.652	19.8265	20.212	19.8413	15.05	19.8413	6.644	19.8413	7.74	19.8413	15.4614	19.8413	16.317	19.8413	13.1399	19.8413	11.011	19.8402	15.2046	0.13	0.05	0.02
19.9315	23.75	19.9315	20.816	19.9315	15.22	19.9315	17.115	19.9315	11.976	19.9166	31.82	19.9315	14.014	19.9315	7.682	19.9315	7.263	19.9315	16.5858	19.9315	20.159	19.9315	12.621	19.9315	10.65	19.9304	16.1286	0.14	0.06	0.02
20.0216	52.083	20.0216	15.173	20.0216	15.409	20.0216	16.646	20.0216	8.445	20.0067	42.4	20.0216	12.164	20.0216	9.148	20.0216	7.441	20.0216	14.2828	20.0216	11.545	20.0216	12.3618	20.0216	10.396	20.0205	17.4996	0.15	0.11	0.03
20.1118	39.91	20.1118	21.882	20.1118	15.078	20.1118	13.607	20.1118	7.401	20.0968	35.76	20.1118	9.64	20.1118	9.659	20.1118	6.064	20.1118	12.0992	20.1118	11.927	20.1118	15.7076	20.1118	8.746	20.1106	15.9601	0.14	0.09	0.02
20.202	50.085	20.202	10.524	20.202	15.999	20.202	14.082	20.202	8.917	20.187	21.737	20.202	10.731	20.202	7.918	20.202	5.103	20.202	8.4674	20.202	11.655	20.202	19.4286	20.202	8.051	20.2008	14.8229	0.13	0.1	0.02
20.2922	41.38	20.2922	17.654	20.2922	14.232	20.2922	13.559	20.2922	16.5	20.2771	38.938	20.2922	15.119	20.2922	12.948	20.2922	3.795	20.2922	11.6997	20.2922	8.953	20.2922	11.8608	20.2922	7.906	20.291	16.5034	0.14	0.09	0.02
20.3824	44.298	20.3824	8.9	20.3824	18.243	20.3824	12.787	20.3824	11.847	20.3672	31.202	20.3824	16.575	20.3824	10.94	20.3824	3.27	20.3824	11.5396	20.3824	25.113	20.3824	16.583	20.3824	6.392	20.3812	16.7454	0.14	0.09	0.02
20.4726	44.381	20.4726	17.335	20.4726	22.208	20.4726	15.48	20.4726	12.335	20.4573	28.957	20.4726	19.783	20.4726	12.861	20.4726	6.327	20.4726	11.2625	20.4726	18.133	20.4726	14.4143	20.4726	10.365	20.4714	17.9878	0.15	0.08	0.02
20.5628	28.88	20.5628	10.621	20.5628	21.505	20.5628	16.893	20.5628	20.733	20.5474	31.968	20.5628	20.554	20.5628	9.678	20.5628	11.592	20.5628	10.0912	20.5628	19.273	20.5628	23.1092	20.5628	6.848	20.5616	17.8266	0.15	0.06	0.02
20.653	26.538	20.653	14.094	20.653	27.511	20.653	12.81	20.653	25.658	20.6376	30.341	20.653	20.149	20.653	8.055	20.653	12.61	20.653	9.1746	20.653	28.022	20.653	13.2787	20.653	6.81	20.6518	18.0809	0.15	0.07	0.02
20.7431	28.785	20.7431	18.315	20.7431	29.104	20.7431	16.095	20.7431	16.018	20.7277	32.628	20.7431	21.371	20.7431	12.034	20.7431	6.951	20.7431	9.4089	20.7431	24.831	20.7431	10.9887	20.7431	8	20.7419	18.0407	0.15	0.07	0.02
20.8333	25.632	20.8333	18.594	20.8333	24.25	20.8333	17.257	20.8333	14.798	20.8178	34.139	20.8333	20.459	20.8333	10.026	20.8333	4.029	20.8333	13.2657	20.8333	23.983	20.8333	12.6998	20.8333	6.6	20.8321	17.364	0.15	0.07	0.02
20.9235	19.233	20.9235	11.944	20.9235	26.502	20.9235	16.926	20.9235	20.6	20.9079	34.133	20.9235	24.466	20.9235	6	20.9235	8.778	20.9235	14.1359	20.9235	17.308	20.9235	29.8637	20.9235	18.6	20.9223	19.1146	0.16	0.07	0.02
21.0137	27.177	21.0137	15.824	21.0137	24.841	21.0137	17.102	21.0137	15.708	20.9981	44.625	21.0137	27.58	21.0137	7.585	21.0137	7.844	21.0137	16.5488	21.0137	21.688	21.0137	25.1656	21.0137	19.1	21.0125	20.8299	0.18	0.08	0.02
21.1039	23.092	21.1039	19.787	21.1039	23.082	21.1039	12.76	21.1039	14.272	21.0882	45.983	21.1039	19.3	21.1039	13.373	21.1039	5.105	21.1039	13.9795	21.1039	33.661	21.1039	25.6976	21.1039	15.6	21.1027	20.4379	0.18	0.09	0.02
21.1941	14.745	21.1941	12.302	21.1941	22.512	21.1941	10.585	21.1941	17.902	21.1783	35.202	21.1941	20.735	21.1941	9.392	21.1941	4.906	21.1941	8.2061	21.1941	28.297	21.1941	32.7046	21.1941	13.6	21.1929	17.7761	0.15	0.08	0.02
21.2843	19.301	21.2843	9.928	21.2843	22.361	21.2843	10.73	21.2843	20.671	21.2684	34.405	21.2843	18.136	21.2843	4.732	21.2843	2.883	21.2843	8.1393	21.2843	21.672	21.2843	29.7855	21.2843	20.7	21.2831	17.188	0.15	0.08	0.02
21.3745	18.825	21.3745	14.656	21.3745	30.5	21.3745	15.121	21.3745	20.815	21.3585	32.821	21.3745	15.994	21.3745	10.296	21.3745	6.755	21.3745	10.2625	21.3745	20.602	21.3745	31.53	21.3745	19.1	21.3733	19.0213	0.16	0.07	0.02
21.4646	19.537	21.4646	13.103	21.4646	31.415	21.4646	8.153	21.4646	19.267	21.4487	28.792	21.4646	15.599	21.4646	10.255	21.4646	10.373	21.4646	13.1235	21.4646	19.768	21.4646	24.3052	21.4646	12.8	21.4634	17.4224	0.15	0.06	0.02
21.5548	15.992	21.5548	13.773	21.5548	31.912	21.5548	12.456	21.5548	18.318	21.5388	31.933	21.5548	10.471	21.5548	10.073	21.5548	7.927	21.5548	13.1161	21.5548	19.818	21.5548	33.5674	21.5548	15.2	21.5536	18.0428	0.15	0.07	0.02
21.645	24.704	21.645	13.049	21.645	28.185	21.645	15.847	21.645	10.041	21.6289	27.773	21.645	12.447	21.645	3.809	21.645	6.207	21.645	10.3563	21.645	13.673	21.645	25.5257	21.645	14.2	21.6438	15.8321	0.14	0.07	0.02
21.7352	16.003	21.7352	9.963	21.7352	31.643	21.7352	12.868	21.7352	15.265	21.719	28.665	21.7352	13.561	21.7352	3.666	21.7352	5.37	21.7352	11.8273	21.7352	20.157	21.7352	21.4458	21.7352	9.5	21.734	15.3795	0.13	0.07	0.02
21.8254	14.79	21.8254	16.139	21.8254	33.384	21.8254	9.161	21.8254	18.641	21.8091	42.853	21.8254	14.979	21.8254	8.872	21.8254	5.289	21.8254	14.4437	21.8254	17.512	21.8254	33.4784	21.8254	14.3	21.8241	18.7571	0.16	0.09	0.02
21.9156	25.394	21.9156	14.558	21.9156	32.129	21.9156	17.02	21.9156	12.529	21.8993	49.15	21.9156	19.216	21.9156	10.22	21.9156	8.361	21.9156	18.4686	21.9156	14.5	21.9156	24.9532	21.9156	15.6	21.9143	20.1614	0.17	0.09	0.02
22.0058	19.829	22.0058	16.871	22.0058	33.481	22.0058	20.621	22.0058	15.79	21.9894	61.447	22.0058	14.485	22.0058	6.555	22.0058	5.947	22.0058	13.5742	22.0058	19.547	22.0058	30.3924	22.0058	13.6	22.0045	20.9338	0.18	0.12	0.03
22.096	20.157	22.096	19.412	22.096	33.499	22.096	13.015	22.096	12.701	22.0795	49.834	22.096	13.703	22.096	6.576	22.096	3.88	22.096	15.9483	22.096	17.861	22.096	21.9364	22.096	9.516	22.0947	18.3107	0.16	0.1	0.02
22.1861	17.302	22.1861	14.423	22.1861	31.392	22.1861	14.27	22.1861	9.061	22.1696	52.932	22.1861	17.495	22.1861	7.964	22.1861	8.67	22.1861	15.8427	22.1861	16.702	22.1861	28.9959	22.1861	16.145	22.1848	19.3227	0.17	0.1	0.02
22.2763	17.077	22.2763	19.084	22.2763	40.845	22.2763	15.034	22.2763	7.128	22.2597	57.152	22.2763	15.286	22.2763	10.696	22.2763	7.615	22.2763	17.3294	22.2763	12.779	22.2763	11.6989	22.2763	14.015	22.275	18.903	0.16	0.12	0.03
22.3665	20.312	22.3665	24.107	22.3665	43.325	22.3665	17.973	22.3665	11.775	22.3499	41.064	22.3665	14.749	22.3665	6.989	22.3665	5.121	22.3665	24.4532	22.3665	13.399	22.3665	21.5259	22.3665	11.924	22.3652	19.7475	0.17	0.1	0.02
22.4567	15.834	22.4567	21.259	22.4567	45.737	22.4567	16.143	22.4567	15.418	22.44	30.46	22.4567	18.08	22.4567	7.805	22.4567	4.452	22.4567	21.992	22.4567	13.419	22.4567	13.458	22.4567	7.979	22.4554	17.8489	0.15	0.09	0.02
22.5469	19.169	22.5469	25.361	22.5469	42.403	22.5469	10.76	22.5469	11.939	22.5301	35.983	22.5469	21.642	22.5469	6.106	22.5469	2.559	22.5469	20.7781	22.5469	17.351	22.5469	22.6655	22.5469	12.024	22.5456	19.1339	0.16	0.09	0.02
22.6371	10.263	22.6371	29.763	22.6371	41.515	22.6371	8.2	22.6371	13.811	22.6202	38.77	22.6371	17.127	22.6371	6.067	22.6371	4.401	22.6371	28.9889	22.6371	6.68	22.6371	21.6254	22.6371	11.894	22.6358	18.3927	0.16	0.1	0.02
22.7273	15.69	22.7273	30.484	22.7273	42.759	22.7273	8.647	22.7273	10.218	22.7103	30.367	22.7273	18.933	22.7273	8.289	22.7273	3.864	22.7273	32.8612	22.7273	7.457	22.7273	18.939	22.7273	10.422	22.726	18.3792	0.16	0.1	0.02
22.8175	18.051	22.8175	34.489	22.8175	42.619	22.8175	15.629	22.8175	12.07	22.8005	22.509	22.8175	24.011	22.8175	8.663	22.8175	3.387	22.8175	23.071	22.8175	14.118	22.8175	23.2914	22.8175	12.347	22.8162	19.5581	0.17	0.09	0.02
22.9076	17.542	22.9076	35.865	22.9076	36.719	22.9076	15.617	22.9076	11.566	22.8906	20.965	22.9076	20.081	22.9076	9.942	22.9076	7.498	22.9076	18.779	22.9076	12.204	22.9076	18.9843	22.9076	15.145	22.9063	18.5313	0.16	0.07	0.02
22.9978	23.932	22.9978	21.075	22.9978	39.806	22.9978	8.307	22.9978	5.577	22.9807	23.922	22.9978	24.979	22.9978	6.059	22.9978	7.539	22.9978	22.3657	22.9978	11.77	22.9978	14.3498	22.9978	9.824	22.9965	16.885	0.14	0.08	0.02
23.088	21.477	23.088	23.138	23.088	41.563	23.088	11.84	23.088	9.931	23.0708	19.18	23.088	28.139	23.088	4.715	23.088	9.127	23.088	17.6919	23.088	17.476	23.088	17.9256	23.088	12.492	23.0867	18.0535	0.15	0.08	0.02
23.1782	20.123	23.1782	22.512	23.1782	35.327	23.1782	12.35	23.1782	18.179	23.1609	17.867	23.1782	25.085	23.1782	3.999	23.1782	8.737	23.1782	5.743	23.1782	15.374	23.1782	11.8953	23.1782	10.126	23.1769	15.9475	0.14	0.07	0.02
23.2684	24.657	23.2684	16.333	23.2684	28.788	23.2684	9.909	23.2684	15.058	23.2511	14.504	23.2684	30.7	23.2684	3.389	23.2684	9.614	23.2684	16.6323	23.2684	18.2	23.2684	12.2197	23.2684	18.516	23.2671	16.8092	0.14	0.06	0.02
23.3586	19.813	23.3586	13.483	23.3586	34.029	23.3586	7.925	23.3586	15.074	23.3412	14.284	23.3586	37	23.3586	3.075	23.3586	16.116	23.3586	14.1291	23.3586	17.272	23.3586	18.8212	23.3586	18.429	23.3573	17.65	0.15	0.08	0.02
23.4488	21.332	23.4488	11.475	23.4488	35.301	23.4488	10.121	23.4488	14.415	23.4313	20.359	23.4488	28.634	23.4488	9.168	23.4488	17.937	23.4488	12.0477	23.4488	10.989	23.4488	20.2234	23.4488	15.254	23.4475	17.4812	0.15	0.06	0.02
23.539	24.621	23.539	19.539	23.539	32.617	23.539	13.258	23.539	15.85	23.5214	22.822	23.539	26.598	23.539	5.001	23.539	14.239	23.539	13.676	23.539	9.271	23.539	10.6239	23.539	14.823	23.5376	17.1491	0.15	0.06	0.02
23.6291	14.504	23.6291	10.373	23.6291	32.245	23.6291	6.818	23.6291	12.627	23.6115	31.868	23.6291	27.388	23.6291	8.713	23.6291	10.576	23.6291	13.7264	23.6291	8.892	23.6291	13.7209	23.6291	12.188	23.6277	15.6646	0.13	0.07	0.02
23.7193	18.269	23.7193	11.187	23.7193	30.036	23.7193	8.745	23.7193	11.048	23.7017	26.533	23.7193	23.81	23.7193	8.407	23.7193	11.251	23.7193	12.0249	23.7193	13.032	23.7193	21.0667	23.7193	15.873	23.7179	16.2525	0.14	0.06	0.02
23.8095	25.079	23.8095	17.759	23.8095	25.157	23.8095	6.138	23.8095	10.233	23.7918	17.489	23.8095	23.327	23.8095	6.614	23.8095	10.777	23.8095	17.8662	23.8095	11.36	23.8095	14.7553	23.8095	14.424	23.8081	15.4599	0.13	0.05	0.02
23.8997	24.977	23.8997	19.62	23.8997	22.625	23.8997	9.15	23.8997	13.945	23.8819	18.963	23.8997	13.693	23.8997	10.633	23.8997	10.122	23.8997	15.6197	23.8997	8.27	23.8997	17.0018	23.8997	13.051	23.8983	15.2054	0.13	0.04	0.02
23.9899	28.036	23.9899	14.201	23.9899	32.235	23.9899	13.573	23.9899	18.437	23.972	13.526	23.9899	15.367	23.9899	6.312	23.9899	10.804	23.9899	8	23.9899	8.129	23.9899	19.2358	23.9899	5.998	23.9885	14.9118	0.13	0.07	0.02
24.0801	18.94	24.0801	17.605	24.0801	33.724	24.0801	9.512	24.0801	22.203	24.0621	14.728	24.0801	20.257	24.0801	10.589	24.0801	10.651	24.0801	11.6388	24.0801	8.149	24.0801	16.5642	24.0801	8.275	24.0787	15.6028	0.13	0.06	0.02
24.1703	12.973	24.1703	17.672	24.1703	36.759	24.1703	16.293	24.1703	25.694	24.1523	16.378	24.1703	15.187	24.1703	11.063	24.1703	8.342	24.1703	15.9424	24.1703	23.278	24.1703	23.2062	24.1703	8.895	24.1689	17.8217	0.15	0.06	0.02
24.2605	16.969	24.2605	18.492	24.2605	41.24	24.2605	20.107	24.2605	15.851	24.2424	18.81	24.2605	22.066	24.2605	14.003	24.2605	5.998	24.2605	15.2798	24.2605	13.346	24.2605	30.3587	24.2605	5.131	24.2591	18.2809	0.16	0.08	0.02
24.3506	13.812	24.3506	19.806	24.3506	31.565	24.3506	18.974	24.3506	11.003	24.3325	17.58	24.3506	12.043	24.3506	5.716	24.3506	4.688	24.3506	12.5724	24.3506	12.759	24.3506	36.6959	24.3506	10.468	24.3492	15.9756	0.14	0.08	0.02
24.4408	23.914	24.4408	28.174	24.4408	28.457	24.4408	21.413	24.4408	12.563	24.4226	17.729	24.4408	13.314	24.4408	7.819	24.4408	4.661	24.4408	9.888	24.4408	14.938	24.4408	28.5102	24.4408	16.66	24.4394	17.5416	0.15	0.07	0.02
24.531	21.265	24.531	21.67	24.531	25.2	24.531	32.775	24.531	18.449	24.5127	15.1	24.531	20.694	24.531	6.172	24.531	7.06	24.531	17.612	24.531	13.854	24.531	29.3322	24.531	16.108	24.5296	18.8686	0.16	0.06	0.02
24.6212	23.547	24.6212	12.485	24.6212	22.594	24.6212	34.548	24.6212	18.716	24.6029	14.338	24.6212	19.265	24.6212	7.128	24.6212	4.637	24.6212	11.8528	24.6212	15.835	24.6212	23.4541	24.6212	11.485	24.6198	16.9142	0.14	0.07	0.02
24.7114	23.307	24.7114	13.977	24.7114	21.617	24.7114	41.093	24.7114	16.552	24.693	11.448	24.7114	21.463	24.7114	2.603	24.7114	2.595	24.7114	25.3567	24.7114	18.128	24.7114	30.7826	24.7114	6.82	24.71	18.134	0.16	0.09	0.02
24.8016	20.207	24.8016	18.619	24.8016	31.835	24.8016	56.047	24.8016	20.007	24.7831	16.144	24.8016	28.158	24.8016	2.716	24.8016	2.985	24.8016	11.8246	24.8016	11.559	24.8016	33.0346	24.8016	12.426	24.8002	20.4279	0.18	0.12	0.03
24.8918	22.976	24.8918	28.693	24.8918	41.32	24.8918	47.077	24.8918	25.368	24.8732	13.827	24.8918	19.473	24.8918	7.596	24.8918	3.816	24.8918	8.2875	24.8918	8.313	24.8918	37.4327	24.8918	11.354	24.8904	21.1949	0.18	0.12	0.03
24.982	25.137	24.982	17.082	24.982	40.187	24.982	49.008	24.982	19.602	24.9633	12.426	24.982	16.122	24.982	5.723	24.982	5.896	24.982	14.2578	24.982	11.402	24.982	21.9956	24.982	6.718	24.9806	18.889	0.16	0.11	0.03
25.0721	25.851	25.0721	16.218	25.0721	33.189	25.0721	45.699	25.0721	13.658	25.0535	22.05	25.0721	25.368	25.0721	4.138	25.0721	9.549	25.0721	26.0001	25.0721	12.687	25.0721	20.0803	25.0721	6.11	25.0707	20.046	0.17	0.1	0.02
25.1623	31.164	25.1623	25.429	25.1623	33.418	25.1623	45.172	25.1623	17.054	25.1436	11.78	25.1623	23.783	25.1623	15.297	25.1623	9.462	25.1623	23.511	25.1623	10.304	25.1623	15.6781	25.1623	14.269	25.1609	21.2555	0.18	0.09	0.02
25.2525	36.129	25.2525	23.881	25.2525	32.963	25.2525	49.424	25.2525	16.402	25.2337	24.32	25.2525	19.527	25.2525	13.938	25.2525	4.419	25.2525	30.713	25.2525	13.35	25.2525	16.7076	25.2525	22.724	25.2511	23.4229	0.2	0.1	0.02
25.3427	41.975	25.3427	23.219	25.3427	31.966	25.3427	47.382	25.3427	13.915	25.3238	19.68	25.3427	19.578	25.3427	10.72	25.3427	3.816	25.3427	30.6435	25.3427	15.305	25.3427	19.092	25.3427	20.287	25.3412	22.8907	0.2	0.1	0.02
25.4329	54.018	25.4329	19.301	25.4329	33.146	25.4329	42.409	25.4329	17.781	25.4139	24.32	25.4329	24.702	25.4329	13.163	25.4329	7.398	25.4329	27.4237	25.4329	10.626	25.4329	20.7675	25.4329	13.77	25.4314	23.7558	0.2	0.11	0.03
25.5231	45.336	25.5231	18.243	25.5231	31.881	25.5231	33.286	25.5231	19.577	25.5041	17.16	25.5231	14.955	25.5231	9.916	25.5231	7.366	25.5231	26.7605	25.5231	13.668	25.5231	13.478	25.5231	10.98	25.5216	20.2005	0.17	0.09	0.02
25.6133	46.612	25.6133	20.904	25.6133	40.566	25.6133	29.482	25.6133	23.954	25.5942	12.32	25.6133	22.5	25.6133	10.822	25.6133	5.108	25.6133	27.9401	25.6133	20.644	25.6133	14.7847	25.6133	13.061	25.6118	22.2075	0.19	0.1	0.02
25.7035	36.212	25.7035	19.225	25.7035	43.429	25.7035	25.471	25.7035	21.254	25.6843	7.47	25.7035	14.927	25.7035	8.64	25.7035	6.397	25.7035	23.861	25.7035	20.813	25.7035	11.9627	25.7035	16.568	25.702	19.71	0.17	0.09	0.02
25.7936	37.157	25.7936	19.631	25.7936	39.728	25.7936	19.877	25.7936	26.308	25.7744	13.63	25.7936	10.797	25.7936	7.478	25.7936	8.746	25.7936	21.5098	25.7936	30.187	25.7936	10.4472	25.7936	13.479	25.7921	19.9212	0.17	0.09	0.02
25.8838	37.044	25.8838	20.67	25.8838	34.723	25.8838	14.312	25.8838	20.559	25.8646	17.05	25.8838	14.532	25.8838	14.292	25.8838	7.679	25.8838	21.5091	25.8838	24.304	25.8838	9.4169	25.8838	13.237	25.8823	19.1791	0.16	0.07	0.02
25.974	29.7	25.974	20.924	25.974	27.924	25.974	15.065	25.974	24.546	25.9547	22.47	25.974	18.867	25.974	15.435	25.974	5.612	25.974	13.5031	25.974	34.758	25.974	16.3414	25.974	24.401	25.9725	20.7343	0.18	0.06	0.02
26.0642	17.858	26.0642	14.229	26.0642	25.163	26.0642	14.608	26.0642	20.313	26.0448	22.96	26.0642	22.704	26.0642	10.677	26.0642	8.817	26.0642	15.8026	26.0642	32.132	26.0642	18.0977	26.0642	27.759	26.0627	19.3169	0.17	0.06	0.02
26.1544	16.962	26.1544	19.409	26.1544	26.213	26.1544	19.284	26.1544	22.918	26.1349	6.31	26.1544	11.857	26.1544	13.099	26.1544	8.633	26.1544	20.8081	26.1544	28.223	26.1544	12.6457	26.1544	33.397	26.1529	18.443	0.16	0.07	0.02
26.2446	19.294	26.2446	21.506	26.2446	26.864	26.2446	18.672	26.2446	22.88	26.225	15.21	26.2446	10.114	26.2446	14.107	26.2446	6.089	26.2446	16.2628	26.2446	35.506	26.2446	7.4892	26.2446	43.932	26.2431	19.8405	0.17	0.09	0.02
26.3348	17.022	26.3348	19.077	26.3348	25.373	26.3348	15.112	26.3348	19.846	26.3152	15.37	26.3348	14.655	26.3348	16.236	26.3348	8.093	26.3348	18.6523	26.3348	25.9	26.3348	9.6737	26.3348	48.2	26.3333	19.4777	0.17	0.08	0.02
26.425	16.185	26.425	13.217	26.425	30.704	26.425	18.176	26.425	14.843	26.4053	13	26.425	17.696	26.425	11.419	26.425	8.95	26.425	28.7267	26.425	15.035	26.425	9.7383	26.425	35.626	26.4235	17.9474	0.15	0.07	0.02
26.5152	12.672	26.5152	19.533	26.5152	37.689	26.5152	19.39	26.5152	13.282	26.4954	15.1	26.5152	19.11	26.5152	10.098	26.5152	11.013	26.5152	26.6211	26.5152	22.007	26.5152	5.8092	26.5152	26.391	26.5137	18.3627	0.16	0.07	0.02
26.6053	13.559	26.6053	20.464	26.6053	40.767	26.6053	20.738	26.6053	9.008	26.5855	20.48	26.6053	16.832	26.6053	20.47	26.6053	11.157	26.6053	14.7983	26.6053	24.213	26.6053	10.0965	26.6053	21.433	26.6038	18.7704	0.16	0.07	0.02
26.6955	18.067	26.6955	13.984	26.6955	39.424	26.6955	20.068	26.6955	8.466	26.6756	13.52	26.6955	16.346	26.6955	24.229	26.6955	16.532	26.6955	17.5626	26.6955	16.331	26.6955	11.8064	26.6955	24.581	26.694	18.5321	0.16	0.06	0.02
26.7857	23.681	26.7857	18.673	26.7857	39.128	26.7857	17.085	26.7857	12.308	26.7658	22.37	26.7857	24.195	26.7857	19.22	26.7857	22.716	26.7857	18.3858	26.7857	15.018	26.7857	11.7567	26.7857	21.729	26.7842	20.482	0.18	0.06	0.02
26.8759	19.867	26.8759	18.954	26.8759	39.041	26.8759	17.307	26.8759	12.133	26.8559	22.31	26.8759	22.373	26.8759	24.573	26.8759	17.981	26.8759	17.0521	26.8759	19.239	26.8759	5.3126	26.8759	17.505	26.8744	19.5114	0.17	0.06	0.02
26.9661	17.895	26.9661	19.671	26.9661	32.695	26.9661	16.4	26.9661	11.943	26.946	30.727	26.9661	26.982	26.9661	17.704	26.9661	19.386	26.9661	14.8583	26.9661	10.775	26.9661	5.591	26.9661	16.099	26.9646	18.5174	0.16	0.06	0.02
27.0563	23.957	27.0563	22.727	27.0563	35.064	27.0563	15.511	27.0563	10.023	27.0361	30.998	27.0563	30.574	27.0563	12.411	27.0563	16.436	27.0563	22.4754	27.0563	18.536	27.0563	6.746	27.0563	13.392	27.0547	19.9116	0.17	0.07	0.02
27.1465	22.288	27.1465	18.474	27.1465	41.807	27.1465	13.11	27.1465	7.671	27.1262	34.107	27.1465	27.242	27.1465	17.053	27.1465	15.828	27.1465	20.6429	27.1465	12.244	27.1465	3.904	27.1465	11.58	27.1449	18.9193	0.16	0.09	0.02
27.2367	18.122	27.2367	14.767	27.2367	41.897	27.2367	16.306	27.2367	8.401	27.2164	28.358	27.2367	24.196	27.2367	14.654	27.2367	10.645	27.2367	16.4318	27.2367	7.799	27.2367	5.8568	27.2367	12.261	27.2351	16.8996	0.14	0.08	0.02
27.3268	15.702	27.3268	15.9	27.3268	34.473	27.3268	12.902	27.3268	10.162	27.3065	20.41	27.3268	22.944	27.3268	13.526	27.3268	5.455	27.3268	13.1478	27.3268	10.182	27.3268	8.4246	27.3268	7.961	27.3252	14.7069	0.13	0.06	0.02
27.417	15.536	27.417	21.371	27.417	40.063	27.417	8.051	27.417	9.253	27.3966	26.325	27.417	32.377	27.417	12.451	27.417	13.233	27.417	14.1768	27.417	16.453	27.417	10.4171	27.417	12.746	27.4154	17.881	0.15	0.08	0.02
27.5072	19.221	27.5072	25.824	27.5072	53.217	27.5072	9.325	27.5072	9.231	27.4867	27.89	27.5072	30.108	27.5072	13.757	27.5072	11.378	27.5072	13.7298	27.5072	9.911	27.5072	3.6343	27.5072	14.391	27.5056	18.5859	0.16	0.11	0.03
27.5974	16.002	27.5974	25.272	27.5974	46.791	27.5974	7.355	27.5974	7.122	27.5768	27.954	27.5974	19.778	27.5974	11.958	27.5974	10.633	27.5974	12.7886	27.5974	11.044	27.5974	6.2501	27.5974	10.809	27.5958	16.4428	0.14	0.09	0.02
27.6876	17.207	27.6876	22.72	27.6876	33.05	27.6876	11.364	27.6876	4.307	27.667	23.15	27.6876	28.157	27.6876	11.988	27.6876	9.452	27.6876	10.8869	27.6876	12.949	27.6876	7.6194	27.6876	7.724	27.686	15.4288	0.13	0.07	0.02
27.7778	19.431	27.7778	20.04	27.7778	40.544	27.7778	15.794	27.7778	8.479	27.7571	28.82	27.7778	40.548	27.7778	13.641	27.7778	10.628	27.7778	13.2614	27.7778	8.509	27.7778	9.3882	27.7778	6.5	27.7762	18.1218	0.16	0.1	0.02
27.868	20.558	27.868	20.052	27.868	38.399	27.868	14.322	27.868	6.983	27.8472	34.255	27.868	34.521	27.868	14.866	27.868	11.191	27.868	14.543	27.868	10.007	27.868	14.6631	27.868	6.008	27.8664	18.4899	0.16	0.09	0.02
27.9582	22.134	27.9582	29.059	27.9582	29.794	27.9582	19.578	27.9582	9.354	27.9373	30.568	27.9582	35.09	27.9582	10.621	27.9582	7.814	27.9582	12.2068	27.9582	11.626	27.9582	3.6652	27.9582	13.25	27.9566	18.0585	0.15	0.08	0.02
28.0483	23.943	28.0483	28.923	28.0483	32.631	28.0483	18.843	28.0483	9.328	28.0274	30.058	28.0483	26.355	28.0483	5.973	28.0483	7.193	28.0483	17.2778	28.0483	18.427	28.0483	4.0298	28.0483	12.87	28.0467	18.1424	0.16	0.08	0.02
28.1385	22.21	28.1385	29.035	28.1385	35.273	28.1385	20.82	28.1385	6.276	28.1176	26.523	28.1385	16.996	28.1385	9.963	28.1385	6.969	28.1385	13.8557	28.1385	17.949	28.1385	11.1463	28.1385	9.688	28.1369	17.4388	0.15	0.07	0.02
28.2287	21.277	28.2287	29.568	28.2287	33.76	28.2287	22.551	28.2287	9.7	28.2077	20.366	28.2287	18.82	28.2287	13.38	28.2287	6.282	28.2287	12.5872	28.2287	23.745	28.2287	4.2497	28.2287	13.962	28.2271	17.7114	0.15	0.07	0.02
28.3189	27.791	28.3189	24.383	28.3189	40.112	28.3189	22.239	28.3189	12.692	28.2978	25.511	28.3189	18.563	28.3189	12.038	28.3189	5.403	28.3189	9.9233	28.3189	15.968	28.3189	4.8401	28.3189	10.709	28.3173	17.7056	0.15	0.08	0.02
28.4091	29.521	28.4091	21.716	28.4091	46.214	28.4091	13.512	28.4091	11.978	28.3879	20.254	28.4091	15.909	28.4091	15.373	28.4091	7.125	28.4091	17.9499	28.4091	11.885	28.4091	6.4137	28.4091	6.651	28.4075	17.2694	0.15	0.09	0.02
28.4993	30.218	28.4993	14.872	28.4993	41.294	28.4993	11.819	28.4993	10.956	28.478	13.545	28.4993	23.962	28.4993	18.466	28.4993	5.741	28.4993	19.0941	28.4993	14.375	28.4993	7.9363	28.4993	8.335	28.4977	16.9703	0.15	0.08	0.02
28.5895	39.547	28.5895	13.258	28.5895	35.621	28.5895	12.554	28.5895	4.508	28.5682	24.548	28.5895	14.829	28.5895	16.262	28.5895	7.077	28.5895	22.0981	28.5895	12.279	28.5895	11.9655	28.5895	10.6	28.5879	17.319	0.15	0.09	0.02
28.6797	41.339	28.6797	17.29	28.6797	31.728	28.6797	11.054	28.6797	15.87	28.6583	24.478	28.6797	15.701	28.6797	14.922	28.6797	9.749	28.6797	12.3714	28.6797	6.448	28.6797	9.3398	28.6797	9.207	28.6781	16.8844	0.14	0.08	0.02
28.7698	40.302	28.7698	16.278	28.7698	26.974	28.7698	18.238	28.7698	10.512	28.7484	26.222	28.7698	4.785	28.7698	10.692	28.7698	6.339	28.7698	9.4752	28.7698	9.681	28.7698	9.694	28.7698	10.128	28.7682	15.3323	0.13	0.08	0.02
28.86	39.66	28.86	24.094	28.86	23.539	28.86	21.255	28.86	7.585	28.8385	37.662	28.86	23.378	28.86	11.907	28.86	6.18	28.86	25.2005	28.86	12.366	28.86	10.0722	28.86	7.996	28.8583	19.2996	0.17	0.09	0.02
28.9502	30.393	28.9502	28.752	28.9502	21.313	28.9502	17.024	28.9502	9.773	28.9286	35.384	28.9502	17.79	28.9502	16.329	28.9502	9.001	28.9502	18.52	28.9502	12.476	28.9502	9.4241	28.9502	8.983	28.9485	18.0894	0.15	0.07	0.02
29.0404	34.249	29.0404	29.129	29.0404	20.513	29.0404	17.174	29.0404	10.996	29.0188	32.455	29.0404	13.733	29.0404	17.608	29.0404	16.31	29.0404	17.0708	29.0404	21.532	29.0404	6.9552	29.0404	13.395	29.0387	19.3169	0.17	0.07	0.02
29.1306	29.586	29.1306	29.848	29.1306	22.872	29.1306	11.596	29.1306	8.583	29.1089	34.416	29.1306	14.763	29.1306	16.255	29.1306	16.615	29.1306	20.2009	29.1306	14.49	29.1306	7.6227	29.1306	11.246	29.1289	18.3149	0.16	0.07	0.02
29.2208	32.298	29.2208	25.786	29.2208	24.707	29.2208	16.576	29.2208	6.663	29.199	44.661	29.2208	10.319	29.2208	12.881	29.2208	18.783	29.2208	20.8403	29.2208	16.093	29.2208	4.3367	29.2208	7.327	29.2191	18.5593	0.16	0.09	0.02
29.311	34.199	29.311	24.616	29.311	20.45	29.311	23.418	29.311	6.894	29.2891	44.439	29.311	11.101	29.311	12.497	29.311	22.638	29.311	15.7568	29.311	17.332	29.311	6.5646	29.311	7.71	29.3093	19.0473	0.16	0.09	0.02
29.4012	23.036	29.4012	23.179	29.4012	16.681	29.4012	29.597	29.4012	9.917	29.3792	33.833	29.4012	12.625	29.4012	15.417	29.4012	26.477	29.4012	29.941	29.4012	11.436	29.4012	9.438	29.4012	12.096	29.3995	19.5133	0.17	0.07	0.02
29.4913	22.224	29.4913	30.115	29.4913	30.228	29.4913	30.187	29.4913	13.455	29.4694	47.535	29.4913	16.455	29.4913	18.873	29.4913	29.522	29.4913	22.7721	29.4913	12.237	29.4913	9.5644	29.4913	11.544	29.4896	22.6701	0.19	0.09	0.02
29.5815	26.211	29.5815	33.292	29.5815	27.229	29.5815	29.593	29.5815	16.488	29.5595	47.103	29.5815	15.092	29.5815	16.193	29.5815	13.639	29.5815	12.8988	29.5815	12.201	29.5815	8.967	29.5815	5.992	29.5798	20.3768	0.17	0.1	0.02
29.6717	16.505	29.6717	27.574	29.6717	27.21	29.6717	30.724	29.6717	16.23	29.6496	41.364	29.6717	14.216	29.6717	14.939	29.6717	11.125	29.6717	17.8878	29.6717	15.326	29.6717	7.5498	29.6717	4.258	29.67	18.8391	0.16	0.08	0.02
29.7619	20.301	29.7619	34.231	29.7619	23.619	29.7619	40.996	29.7619	19.677	29.7397	42.649	29.7619	11.717	29.7619	15.307	29.7619	18.738	29.7619	7.6713	29.7619	15.784	29.7619	11.1024	29.7619	8.006	29.7602	20.7537	0.18	0.1	0.02
29.8521	11.925	29.8521	23.921	29.8521	21.838	29.8521	43.25	29.8521	28.07	29.8298	35.09	29.8521	12.328	29.8521	17.107	29.8521	21.691	29.8521	15.9177	29.8521	15.014	29.8521	12.2807	29.8521	7.029	29.8504	20.4201	0.17	0.08	0.02
29.9423	20.391	29.9423	24.705	29.9423	24.86	29.9423	38.678	29.9423	25.094	29.92	32.501	29.9423	10.686	29.9423	19.062	29.9423	11.368	29.9423	16.2966	29.9423	15.987	29.9423	8.8449	29.9423	5.797	29.9406	19.5593	0.17	0.08	0.02
30.0325	18.249	30.0325	28.602	30.0325	21.904	30.0325	37.991	30.0325	14.238	30.0101	30.31	30.0325	10.143	30.0325	24.011	30.0325	5.216	30.0325	20.8401	30.0325	16.29	30.0325	7.8484	30.0325	13.518	30.0308	19.1662	0.16	0.08	0.02
30.1227	13.007	30.1227	19.371	30.1227	15.466	30.1227	47.997	30.1227	16.759	30.1002	41.33	30.1227	11.92	30.1227	17.275	30.1227	14.544	30.1227	19.5735	30.1227	16.096	30.1227	5.6681	30.1227	22.2	30.121	20.0928	0.17	0.1	0.02
30.2128	17.574	30.2128	24.85	30.2128	22.205	30.2128	32.466	30.2128	16.635	30.1903	33.42	30.2128	14.181	30.2128	24.569	30.2128	8.775	30.2128	19.3135	30.2128	13.835	30.2128	5.6331	30.2128	23.865	30.2111	19.794	0.17	0.07	0.02
30.303	21.288	30.303	31.321	30.303	27.49	30.303	32.459	30.303	20.582	30.2805	34.526	30.303	14.737	30.303	29.202	30.303	7.742	30.303	14.8495	30.303	12.46	30.303	13.208	30.303	20.545	30.3013	21.57	0.18	0.07	0.02
30.3932	23.315	30.3932	35.582	30.3932	29.997	30.3932	36.252	30.3932	22.828	30.3706	34.28	30.3932	13.908	30.3932	21.383	30.3932	15.323	30.3932	14.1331	30.3932	9.335	30.3932	9.3121	30.3932	11.675	30.3915	21.3326	0.18	0.08	0.02
30.4834	14.556	30.4834	45.136	30.4834	33.511	30.4834	33.314	30.4834	25.247	30.4607	27.584	30.4834	19.01	30.4834	14.368	30.4834	10.869	30.4834	11.2934	30.4834	12.725	30.4834	12.4827	30.4834	10.792	30.4817	20.8375	0.18	0.09	0.02
30.5736	13.111	30.5736	59.177	30.5736	28.439	30.5736	29.319	30.5736	16.111	30.5508	23.048	30.5736	20.202	30.5736	17.311	30.5736	9.751	30.5736	17.4761	30.5736	17.419	30.5736	11.2919	30.5736	12.466	30.5718	21.1632	0.18	0.11	0.03
30.6638	15.44	30.6638	65.502	30.6638	35	30.6638	43.225	30.6638	20.733	30.6409	19.882	30.6638	9.701	30.6638	7.815	30.6638	16.566	30.6638	21.3407	30.6638	17.59	30.6638	16.4041	30.6638	9.912	30.662	23.0085	0.2	0.13	0.03
30.754	18.183	30.754	55.764			30.754	30.367	30.754	14.674	30.7311	22.948	30.754	10.804	30.754	11.947	30.754	18.918	30.754	14.2258	30.754	12.819	30.754	8.5829	30.754	6.469	30.7521	18.8085	0.16	0.11	0.03
30.8442	15.229	30.8442	56.647			30.8442	31.145	30.8442	13.368	30.8212	24.012	30.8442	13.803	30.8442	11.651	30.8442	8.887	30.8442	11.6955	30.8442	13.025	30.8442	12.0364	30.8442	8.798	30.8423	18.3581	0.16	0.11	0.03
30.9343	9.901	30.9343	56.053			30.9343	29.98	30.9343	14.847	30.9113	29.333	30.9343	13.56	30.9343	16.961	30.9343	12.196	30.9343	22.1671	30.9343	13.569	30.9343	5.6228	30.9343	7.833	30.9324	19.3352	0.17	0.11	0.03
31.0245	9.907	31.0245	49.671			31.0245	29.158	31.0245	11.526	31.0014	18.38	31.0245	12.39	31.0245	7.918	31.0245	11.672	31.0245	14.9687	31.0245	11.357	31.0245	4.6108	31.0245	11.156	31.0226	16.0595	0.14	0.1	0.03
31.1147	10.449	31.1147	37.184			31.1147	23.473	31.1147	13.941	31.0915	19.439	31.1147	16.684	31.1147	12.768	31.1147	12.058	31.1147	12.4701	31.1147	11.633	31.1147	6.9455	31.1147	8.918	31.1128	15.4969	0.13	0.07	0.02
31.2049	10.898	31.2049	30.009			31.2049	21.293	31.2049	14.413	31.1817	29.391	31.2049	17.381	31.2049	13.827	31.2049	14.394	31.2049	15.51	31.2049	16.02	31.2049	1.4986	31.2049	8.474	31.203	16.0924	0.14	0.07	0.02
31.2951	12.549	31.2951	33.674			31.2951	18.481	31.2951	17.152	31.2718	27.834	31.2951	18.507	31.2951	8.073	31.2951	13.912	31.2951	19.6563	31.2951	12.007	31.2951	4.5109	31.2951	10.88	31.2932	16.4364	0.14	0.07	0.02
31.3853	15.327	31.3853	31.999			31.3853	24.477	31.3853	17.676	31.3619	26.57	31.3853	16.091	31.3853	3.875	31.3853	16.967	31.3853	20.318	31.3853	11.628	31.3853	7.6817	31.3853	3.705	31.3834	16.3596	0.14	0.07	0.02
31.4755	17.009	31.4755	29.842			31.4755	20.43	31.4755	9.448	31.452	18.818	31.4755	20.559	31.4755	15.004	31.4755	12.308	31.4755	18.2178	31.4755	8.898	31.4755	11.4968	31.4755	3.865	31.4735	15.4913	0.13	0.06	0.02
31.5657	14.424	31.5657	28.273			31.5657	21.308	31.5657	13.948	31.5421	15.319	31.5657	18.511	31.5657	13.922	31.5657	23.926	31.5657	18.455	31.5657	12.042	31.5657	15.8718	31.5657	12.048	31.5637	17.3373	0.15	0.04	0.02
31.6558	14.884	31.6558	25.192			31.6558	22.437	31.6558	13.5	31.6323	9.239	31.6558	25.03	31.6558	11.502	31.6558	11.242	31.6558	23.0433	31.6558	13.14	31.6558	22.814	31.6558	15.764	31.6538	17.3156	0.15	0.05	0.02
31.746	10.685	31.746	19.007			31.746	20.568	31.746	10.837	31.7224	16.35	31.746	19.289	31.746	21.052	31.746	14.39	31.746	19.1676	31.746	14.342	31.746	10.2381	31.746	9.302	31.744	15.4356	0.13	0.04	0.02
31.8362	17.455	31.8362	22.873			31.8362	20.178	31.8362	14.899	31.8125	21.45	31.8362	19.38	31.8362	15.12	31.8362	14.644	31.8362	24.5662	31.8362	11.549	31.8362	6.9383	31.8362	13.376	31.8342	16.869	0.14	0.04	0.02
31.9264	14.186	31.9264	36.896			31.9264	18.372	31.9264	12.192	31.9026	24.457	31.9264	28.787	31.9264	21.702	31.9264	13.028	31.9264	17.5542	31.9264	13.991	31.9264	8.6998	31.9264	6.244	31.9244	18.0091	0.15	0.07	0.02
32.0166	15.499	32.0166	46.569			32.0166	15.236	32.0166	15.538	31.9927	27.457	32.0166	43.234	32.0166	13.162	32.0166	14.116	32.0166	11.5893	32.0166	13.54	32.0166	8.7203	32.0166	11.818	32.0146	19.7066	0.17	0.1	0.03
32.1068	11.477	32.1068	36.724			32.1068	23.71	32.1068	18.787	32.0829	23.594	32.1068	42.399	32.1068	12.149	32.1068	14.174	32.1068	17.4879	32.1068	12.002	32.1068	12.2949	32.1068	8.023	32.1048	19.4018	0.17	0.09	0.02
32.197	13.327	32.197	29.552			32.197	27.803	32.197	14.422	32.173	25.989	32.197	40.516	32.197	13.61	32.197	13.196	32.197	17.5778	32.197	21.227	32.197	13.7931	32.197	7.791	32.195	19.9003	0.17	0.08	0.02
32.2872	16.36	32.2872	20.601			32.2872	40.892	32.2872	10.339	32.2631	31.316	32.2872	26.669	32.2872	20.678	32.2872	7.718	32.2872	20.0475	32.2872	20.446	32.2872	13.0867	32.2872	11.72	32.2852	19.9894	0.17	0.08	0.02
32.3773	9.734	32.3773	22.612			32.3773	48.538	32.3773	12.214	32.3532	21.496	32.3773	30.602	32.3773	8.744	32.3773	8.46	32.3773	15.3608	32.3773	22.216	32.3773	12.9746	32.3773	5.614	32.3753	18.2138	0.16	0.1	0.03
32.4675	13.676	32.4675	23.175			32.4675	55.679	32.4675	13.786	32.4433	15.717	32.4675	32.763	32.4675	9.97	32.4675	13.554	32.4675	9.0194	32.4675	27.413	32.4675	5.2976	32.4675	2.5	32.4655	18.5458	0.16	0.12	0.03
32.5577	12.228	32.5577	28.965			32.5577	48.009	32.5577	8.954	32.5335	13.235	32.5577	26.17	32.5577	16.012	32.5577	20.164	32.5577	6.7581	32.5577	22.922	32.5577	8.339	32.5577	7.696	32.5557	18.2877	0.16	0.1	0.03
32.6479	15.281	32.6479	30.642			32.6479	50.267	32.6479	12.218	32.6236	11.739	32.6479	18.166	32.6479	11.898	32.6479	25.897	32.6479	11.1776	32.6479	22.117	32.6479	7.501	32.6479	13.228	32.6459	19.1776	0.16	0.1	0.03
32.7381	11.564	32.7381	27.539			32.7381	50.173	32.7381	13.319	32.7137	11.29	32.7381	22.038	32.7381	15.545	32.7381	25.124	32.7381	16.2626	32.7381	15.747	32.7381	4.8996	32.7381	12.543	32.7361	18.837	0.16	0.1	0.03
32.8283	20.044	32.8283	23.915			32.8283	45.436	32.8283	16.485	32.8038	13.42	32.8283	20.042	32.8283	13.239	32.8283	18.555	32.8283	11.0091	32.8283	14.978	32.8283	11.6256	32.8283	10.894	32.8263	18.3036	0.16	0.08	0.02
32.9185	28.211	32.9185	25.523			32.9185	33.275	32.9185	14.775	32.8939	18.85	32.9185	14.964	32.9185	11.255	32.9185	14.489	32.9185	10.1228	32.9185	19.522	32.9185	11.4532	32.9185	12.519	32.9164	17.9133	0.15	0.06	0.02
33.0087	25.224	33.0087	24.907			33.0087	29.921	33.0087	9.429	32.9841	17.58	33.0087	13.931	33.0087	13.241	33.0087	13.967	33.0087	11.2195	33.0087	21.905	33.0087	13.5119	33.0087	15.792	33.0067	17.5524	0.15	0.05	0.02
33.0988	29.281	33.0988	23.551			33.0988	28.56	33.0988	13.692	33.0742	8.73	33.0988	22.566	33.0988	10.041	33.0988	13.196	33.0988	19.0087	33.0988	25.529	33.0988	6.9777	33.0988	16.076	33.0968	18.1007	0.16	0.06	0.02
33.189	41.894	33.189	23.691			33.189	35.22	33.189	17.028	33.1643	15.97	33.189	18.925	33.189	9.468	33.189	18.24	33.189	24.9036	33.189	21.351	33.189	7.2858	33.189	16.063	33.1869	20.8366	0.18	0.08	0.02
33.2792	50.477	33.2792	24.977			33.2792	27.342	33.2792	16.034	33.2544	21.01	33.2792	16.05	33.2792	11.116	33.2792	18.94	33.2792	19.3219	33.2792	23.618	33.2792	4.7451	33.2792	21.906	33.2771	21.2948	0.18	0.09	0.03
33.3694	54.642	33.3694	27.411			33.3694	25.756	33.3694	15.33	33.3445	18	33.3694	9.043	33.3694	12.193	33.3694	16.73	33.3694	13.2627	33.3694	22.104	33.3694	8.8566	33.3694	22.209	33.3673	20.4614	0.18	0.1	0.03
33.4596	45.805	33.4596	26.236			33.4596	26.327	33.4596	17.326	33.4347	19.14	33.4596	9.988	33.4596	12.119	33.4596	7.88	33.4596	11.9969	33.4596	17.344	33.4596	12.2858	33.4596	16.883	33.4575	18.6109	0.16	0.08	0.02
33.5498	62.489	33.5498	31.735			33.5498	29.736	33.5498	8.324	33.5248	26.27	33.5498	20.198	33.5498	6.194	33.5498	4.21	33.5498	15.1433	33.5498	13.398	33.5498	8.4248	33.5498	11.051	33.5477	19.7644	0.17	0.13	0.03
33.64	46.897	33.64	30.032			33.64	24.335	33.64	9.008	33.6149	30.43	33.64	11.08	33.64	7.729	33.64	10.91	33.64	15.6556	33.64	12.149	33.64	10.7255	33.64	12.783	33.6379	18.4778	0.16	0.1	0.03
33.7302	40.665	33.7302	33.884			33.7302	24.786	33.7302	14.973	33.705	24.3	33.7302	32.241	33.7302	11.444	33.7302	7.94	33.7302	16.8561	33.7302	16.85	33.7302	7.7273	33.7302	13.249	33.7281	20.4096	0.17	0.09	0.02
33.8203	42.048	33.8203	39.579			33.8203	24.286	33.8203	13.792	33.7951	16.58	33.8203	16.357	33.8203	8.523	33.8203	6.21	33.8203	18.1453	33.8203	13.812	33.8203	5.8741	33.8203	19.01	33.8182	18.6847	0.16	0.1	0.03
33.9105	39.327	33.9105	31.686			33.9105	28.124	33.9105	16.756	33.8853	11.15	33.9105	23.249	33.9105	8.495	33.9105	13.063	33.9105	9.5024	33.9105	11.043	33.9105	5.3313	33.9105	30.705	33.9084	19.036	0.16	0.09	0.03
34.0007	34.144	34.0007	32.007			34.0007	25.507	34.0007	13.016	33.9754	15.84	34.0007	17.292	34.0007	10.15	34.0007	15.061	34.0007	8.675	34.0007	12.791	34.0007	5.5904	34.0007	31.036	33.9986	18.4258	0.16	0.08	0.02
34.0909	35.296	34.0909	30.517			34.0909	17.398	34.0909	15.564	34.0655	21	34.0909	24.236	34.0909	8.508	34.0909	16.464	34.0909	10.4919	34.0909	13	34.0909	5.9402	34.0909	27.453	34.0888	18.8223	0.16	0.07	0.02
34.1811	40.744	34.1811	42.937			34.1811	15.159	34.1811	15.368	34.1556	20.43	34.1811	15.854	34.1811	11.777	34.1811	10.664	34.1811	6.2933	34.1811	12.233	34.1811	6.9084	34.1811	26.71	34.179	18.7565	0.16	0.1	0.03
34.2713	32.232	34.2713	32.723			34.2713	17.817	34.2713	14.849	34.2458	23.42	34.2713	16.001	34.2713	12.399	34.2713	13.224	34.2713	11.0599	34.2713	9.283	34.2713	8.8435	34.2713	28.871	34.2692	18.3935	0.16	0.07	0.02
34.3615	30.301	34.3615	40			34.3615	23.821	34.3615	19.488	34.3359	22.58	34.3615	15.056	34.3615	14.099	34.3615	13.509	34.3615	15.0488	34.3615	9.847	34.3615	7.9134	34.3615	22.977	34.3594	19.5533	0.17	0.07	0.02
34.4517	36.743					34.4517	27.312	34.4517	17.017	34.426	17.72	34.4517	8.568	34.4517	7.829	34.4517	19.984	34.4517	10.6449	34.4517	13.056	34.4517	6.6736	34.4517	19.611	34.4494	16.8326	0.14	0.07	0.02
34.5418	26.649					34.5418	21.681	34.5418	17.175	34.5161	13.15	34.5418	21.723	34.5418	7.211	34.5418	14.698	34.5418	10.1131	34.5418	11.425	34.5418	7.9666	34.5418	22.737	34.5395	15.8662	0.14	0.05	0.02
34.632	22.078					34.632	20.369	34.632	21.164	34.6062	21.83	34.632	22.736	34.632	4.817	34.632	17.058	34.632	9.8573	34.632	13.801	34.632	6.4728	34.632	15.334	34.6297	15.9561	0.14	0.05	0.02
34.7222	19.623					34.7222	14.053	34.7222	20.616	34.6964	23.16	34.7222	14.347	34.7222	3.386	34.7222	11.861	34.7222	13.7611	34.7222	19.45	34.7222	9.2858	34.7222	8.133	34.7199	14.3342	0.12	0.05	0.02
34.8124	14.907					34.8124	12.16	34.8124	17.891	34.7865	17.74	34.8124	9.998	34.8124	4.032	34.8124	16.086	34.8124	11.0239	34.8124	19.385	34.8124	9.46	34.8124	14.572	34.81	13.3868	0.11	0.04	0.02
34.9026	15.126					34.9026	9.313	34.9026	20.114	34.8766	19.092	34.9026	12.278	34.9026	2.517	34.9026	16.421	34.9026	16.1946	34.9026	14.311	34.9026	7.5198	34.9026	11.534	34.9002	13.1291	0.11	0.04	0.02
34.9928	23.972					34.9928	8.435	34.9928	24.428	34.9667	25.567	34.9928	16.09	34.9928	9.715	34.9928	12.561	34.9928	12.8709	34.9928	11.881	34.9928	7.2167	34.9928	11.027	34.9904	14.8876	0.13	0.05	0.02
35.083	17.63					35.083	14.436	35.083	13.839	35.0568	18.723	35.083	15.69	35.083	6.378	35.083	20.063	35.083	16.5549	35.083	10.645	35.083	10.641	35.083	9.856	35.0806	14.0414	0.12	0.03	0.02
35.1732	20.98					35.1732	16.139	35.1732	18.245	35.147	16.892	35.1732	14.156	35.1732	2.654	35.1732	18.934	35.1732	16.7376	35.1732	12.472	35.1732	12.373	35.1732	6.745	35.1708	14.2116	0.12	0.04	0.02
35.2633	31.83					35.2633	12.296	35.2633	11.577	35.2371	21.091	35.2633	9.188	35.2633	15.737	35.2633	18.4	35.2633	19.8232	35.2633	11.816	35.2633	9.1744	35.2633	11.102	35.2609	15.6395	0.13	0.06	0.02
35.3535	25.345					35.3535	9.555	35.3535	13.918	35.3272	26.961	35.3535	5.397	35.3535	8.876	35.3535	12.137	35.3535	14.7145	35.3535	12.488	35.3535	18.5685	35.3535	14.572	35.3511	14.7756	0.13	0.05	0.02
35.4437	30.649					35.4437	15.763	35.4437	15.177	35.4173	28.717	35.4437	4.141	35.4437	5.855	35.4437	13.718	35.4437	19.498	35.4437	18.418	35.4437	22.4504	35.4437	16.846	35.4413	17.3848	0.15	0.07	0.02
35.5339	33.062					35.5339	24.389	35.5339	22.859	35.5074	22.207	35.5339	12.417	35.5339	4.851	35.5339	14.967	35.5339	13.7418	35.5339	9.076	35.5339	25.4696	35.5339	15.905	35.5315	18.0859	0.15	0.07	0.02
35.6241	28.393					35.6241	14.855	35.6241	18.931	35.5976	23.5	35.6241	11.341	35.6241	5.463	35.6241	13.785	35.6241	11.4547	35.6241	11.101	35.6241	20.902	35.6241	20.386	35.6217	16.3738	0.14	0.05	0.02
35.7143	22.099					35.7143	12.916	35.7143	11.151	35.6877	20.753	35.7143	8.619	35.7143	10.637	35.7143	8.262	35.7143	9.5226	35.7143	9.05	35.7143	25.8105	35.7143	20.259	35.7119	14.4617	0.12	0.05	0.02
35.8045	26.055					35.8045	17.404	35.8045	17.239	35.7778	24.901	35.8045	10.844	35.8045	12.127	35.8045	18.055	35.8045	18.1029	35.8045	10.643	35.8045	32.9913	35.8045	21.311	35.8021	19.0612	0.16	0.06	0.02
35.8947	23.265					35.8947	17.68	35.8947	17.944	35.8679	20.736	35.8947	12.388	35.8947	10.899	35.8947	10.939	35.8947	15.811	35.8947	7.367	35.8947	35.8769	35.8947	17.337	35.8923	17.2948	0.15	0.06	0.02
35.9848	23.275					35.9848	15.961	35.9848	21.246	35.958	25.642	35.9848	13.746	35.9848	7.719	35.9848	19.562	35.9848	21.5757	35.9848	16.654	35.9848	31.4634	35.9848	13.968	35.9824	19.1647	0.16	0.05	0.02
36.075	20.688					36.075	12.223	36.075	25.536	36.0482	26.462	36.075	16.569	36.075	9.576	36.075	28.992	36.075	10.7511	36.075	7.766	36.075	21.4142	36.075	15.287	36.0726	17.7513	0.15	0.06	0.02
36.1652	17.874					36.1652	9.714	36.1652	26.593	36.1383	27.517	36.1652	13.518	36.1652	9.219	36.1652	15.694	36.1652	9.3497	36.1652	9.651	36.1652	13.8937	36.1652	11.151	36.1628	14.9249	0.13	0.05	0.02
36.2554	26.122					36.2554	14.687	36.2554	24.605	36.2284	44.435	36.2554	10.802	36.2554	13.669	36.2554	17.386	36.2554	11.4291	36.2554	5.066	36.2554	8.3352	36.2554	6.117	36.2529	16.6048	0.14	0.09	0.03
36.3456	26.427					36.3456	19.093	36.3456	19.123	36.3185	42.93	36.3456	12.362	36.3456	8.88	36.3456	10.867	36.3456	24.8319	36.3456	5.893	36.3456	10.5591	36.3456	11.343	36.3431	17.4826	0.15	0.09	0.03
36.4358	21.064					36.4358	10.759	36.4358	19.69	36.4086	52.521	36.4358	9.026	36.4358	6.234	36.4358	15.515	36.4358	12.5094	36.4358	7.36	36.4358	10.0735	36.4358	12.104	36.4333	16.0778	0.14	0.11	0.03
36.526	30.698					36.526	13.605	36.526	22.905	36.4988	45.213	36.526	13.881	36.526	8.709	36.526	18.88	36.526	25.0712	36.526	6.968	36.526	5.9611	36.526	8.469	36.5235	18.2146	0.16	0.1	0.03
36.6162	22.801					36.6162	16.266	36.6162	23.538	36.5889	34.51	36.6162	13.285	36.6162	11.258	36.6162	30.595	36.6162	16.9302	36.6162	8.038	36.6162	8.0917	36.6162	11.23	36.6137	17.8675	0.15	0.07	0.02
36.7063	32.921					36.7063	18.621	36.7063	20.095	36.679	50.543	36.7063	16.272	36.7063	8.737	36.7063	34.736	36.7063	16.1738	36.7063	7.998	36.7063	9.8895	36.7063	13.279	36.7038	20.8423	0.18	0.11	0.03
36.7965	25.365					36.7965	18.265	36.7965	21.768	36.7691	38.033	36.7965	17.465	36.7965	4.415	36.7965	34.953	36.7965	17.2048	36.7965	3.754	36.7965	9.2426	36.7965	7.607	36.794	18.0066	0.15	0.09	0.03
36.8867	30.571					36.8867	18.323	36.8867	25.998	36.8592	41.402	36.8867	18.79	36.8867	9.026	36.8867	21.77	36.8867	28.8075	36.8867	6.168	36.8867	5.3286	36.8867	10.388	36.8842	19.6884	0.17	0.09	0.03
36.9769	24.183					36.9769	13.958	36.9769	28.361	36.9494	42.514	36.9769	18.142	36.9769	12.332	36.9769	19.773	36.9769	8.8698	36.9769	11.874	36.9769	7.9126	36.9769	11.783	36.9744	18.1548	0.16	0.08	0.03
37.0671	26.478					37.0671	16.613	37.0671	38.344	37.0395	45.952	37.0671	13.066	37.0671	13.433	37.0671	32.767	37.0671	21.1991	37.0671	7.121	37.0671	10.6468	37.0671	15.312	37.0646	21.9029	0.19	0.1	0.03
37.1573	41.319					37.1573	16.435	37.1573	44.875	37.1296	50.565	37.1573	18.398	37.1573	12.708	37.1573	26.198	37.1573	19.0172	37.1573	6.12	37.1573	10.356	37.1573	15.514	37.1548	23.7732	0.2	0.12	0.03
37.2475	26.94					37.2475	15.164	37.2475	44.295	37.2197	54.933	37.2475	21.98	37.2475	8.92	37.2475	34.324	37.2475	13.9855	37.2475	10.858	37.2475	7.1216	37.2475	13.468	37.245	22.9081	0.2	0.13	0.03
37.3377	30.492					37.3377	15.504	37.3377	33.229	37.3098	53.929	37.3377	17.239	37.3377	7.341	37.3377	36.225	37.3377	8.2494	37.3377	9.238	37.3377	3.0685	37.3377	9.425	37.3352	20.3582	0.17	0.13	0.03
37.4278	32.024					37.4278	11.735	37.4278	39.808	37.4	63.16	37.4278	13.902	37.4278	9.602	37.4278	20.978	37.4278	9.0491	37.4278	7.065	37.4278	5.1505	37.4278	8.667	37.4253	20.1037	0.17	0.15	0.03
37.518	29.588					37.518	14.48	37.518	37.565	37.4901	66.669	37.518	12.675	37.518	12.011	37.518	24.13	37.518	8.0377	37.518	10.843	37.518	4.7786	37.518	7.584	37.5155	20.7601	0.18	0.15	0.04
37.6082	29.363					37.6082	19.077	37.6082	36.103	37.5802	69.082	37.6082	8.759	37.6082	9.333	37.6082	28.874	37.6082	16.4167	37.6082	2.703	37.6082	4.0741	37.6082	16.909	37.6057	21.8813	0.19	0.16	0.04
37.6984	17.589					37.6984	25.203	37.6984	40.089	37.6703	60.8	37.6984	13.492	37.6984	7.66	37.6984	18.852	37.6984	20.9447	37.6984	10.226	37.6984	7.9368	37.6984	14.502	37.6958	21.5722	0.18	0.13	0.03
37.7886	22.804					37.7886	23.821	37.7886	40.37	37.7604	56.492	37.7886	14.053	37.7886	9.109	37.7886	10.76	37.7886	27.2735	37.7886	8.208	37.7886	6.757	37.7886	6.848	37.786	20.5905	0.18	0.13	0.03
37.8788	36.325					37.8788	17.008	37.8788	30.529	37.8506	61.099	37.8788	10.27	37.8788	6.694	37.8788	15.934	37.8788	19.3044	37.8788	7.654	37.8788	2.5428	37.8788	8.857	37.8762	19.6561	0.17	0.14	0.03
37.969	24.818					37.969	15	37.969	24.04	37.9407	36.241	37.969	11.411	37.969	8.74	37.969	11.955	37.969	18.1159	37.969	12.953	37.969	3.9775	37.969	19.806	37.9664	17.0052	0.15	0.07	0.02
38.0592	21.028					38.0592	23.212	38.0592	22.882	38.0308	40.906	38.0592	23.325	38.0592	10.019	38.0592	11.646	38.0592	11.7275	38.0592	9.796	38.0592	7.0196	38.0592	15.701	38.0566	17.9329	0.15	0.08	0.03
38.1493	29.939					38.1493	24.883	38.1493	17.454	38.1209	42.497	38.1493	26.821	38.1493	7.893	38.1493	6.612	38.1493	12.6072	38.1493	8.401	38.1493	6.587	38.1493	8.268	38.1467	17.4511	0.15	0.1	0.03
38.2395	29.909					38.2395	16.265	38.2395	14	38.211	39.411	38.2395	27.331	38.2395	5.951	38.2395	7.799	38.2395	15.8533	38.2395	12.074	38.2395	4.4937	38.2395	10.438	38.2369	16.6841	0.14	0.09	0.03
38.3297	28.441					38.3297	24.829	38.3297	11.249	38.3012	42.146	38.3297	21.196	38.3297	6.995	38.3297	8.911	38.3297	21.0941	38.3297	3.654	38.3297	4.5831	38.3297	8.841	38.3271	16.5399	0.14	0.1	0.03
38.4199	21.027					38.4199	17.236	38.4199	15.453	38.3913	37.172	38.4199	21.767	38.4199	9.749	38.4199	10.197	38.4199	14.1007	38.4199	4.882	38.4199	5.5212	38.4199	9.774	38.4173	15.1708	0.13	0.08	0.02
38.5101	26.07					38.5101	14.379	38.5101	12.862	38.4814	27.773	38.5101	6.203	38.5101	10.238	38.5101	7.933	38.5101	10.5746	38.5101	7.516	38.5101	3.9502	38.5101	22.757	38.5075	13.6596	0.12	0.07	0.02
38.6003	27.137					38.6003	20.972	38.6003	16.037	38.5715	28.903	38.6003	14.754	38.6003	8.729	38.6003	6.74	38.6003	12.2221	38.6003	4.836	38.6003	4.3616	38.6003	22.499	38.5977	15.1992	0.13	0.07	0.02
38.6905	28.327					38.6905	21.362	38.6905	16.93	38.6616	42.811	38.6905	18.531	38.6905	11.114	38.6905	9.253	38.6905	8.9576	38.6905	6.049	38.6905	6.836	38.6905	26.9	38.6879	17.9155	0.15	0.09	0.03
38.7807	34.568					38.7807	18.433	38.7807	16.524	38.7518	31.714	38.7807	15.86	38.7807	10.644	38.7807	14.971	38.7807	10.8877	38.7807	10.815	38.7807	6.4822	38.7807	24.01	38.7781	17.719	0.15	0.07	0.02
38.8708	27.762					38.8708	18.698	38.8708	9.061	38.8419	24.974	38.8708	15.268	38.8708	12.28	38.8708	13.556	38.8708	7.489	38.8708	3.419	38.8708	8.5497	38.8708	27.873	38.8682	15.3572	0.13	0.07	0.02
38.961	37.865					38.961	25.303	38.961	8.028	38.932	36.22	38.961	23.032	38.961	16.986	38.961	10.04	38.961	7.6215	38.961	4.782	38.961	9.8435	38.961	24.49	38.9584	18.5646	0.16	0.1	0.03
39.0512	38.601					39.0512	24.538	39.0512	22.196	39.0221	28.741	39.0512	20.978	39.0512	14.159	39.0512	8.8	39.0512	14.7072	39.0512	4.324	39.0512	6.0337	39.0512	19	39.0486	18.3707	0.16	0.08	0.03
39.1414	39.57					39.1414	22.867	39.1414	16.228	39.1123	21.847	39.1414	22.598	39.1414	9.374	39.1414	8.276	39.1414	18.3372	39.1414	10.066	39.1414	4.9933			39.1385	17.4156	0.15	0.08	0.03
39.2316	27.015					39.2316	24	39.2316	19.534	39.2024	26.051	39.2316	24.433	39.2316	7.001	39.2316	8.131	39.2316	19.0083	39.2316	6.991	39.2316	2.9282			39.2287	16.5093	0.14	0.08	0.03
39.3218	15.524					39.3218	37.753	39.3218	16.097	39.2925	26.69	39.3218	31.261	39.3218	10.148	39.3218	10.831	39.3218	17.173	39.3218	10.71	39.3218	2.0391			39.3189	17.8226	0.15	0.09	0.03
39.412	16.902					39.412	35.52	39.412	16.604	39.3826	24.197	39.412	22.86	39.412	14.665	39.412	11.65	39.412	11.4913	39.412	9.486	39.412	4.1354			39.4091	16.7511	0.14	0.07	0.03
39.5022	24.481					39.5022	30.839	39.5022	18.09	39.4727	23.973	39.5022	20.153	39.5022	17.073	39.5022	12.073	39.5022	17.6262	39.5022	9.917	39.5022	3.2317			39.4993	17.7457	0.15	0.06	0.03
39.5924	32.153					39.5924	36.728	39.5924	23.972	39.5629	34.661	39.5924	20.766	39.5924	13.296	39.5924	7.528	39.5924	27.6075	39.5924	11.225	39.5924	2.6222			39.5894	21.0559	0.18	0.1	0.03
39.6825	24.838					39.6825	44.69	39.6825	18.638	39.653	36.781	39.6825	22.49	39.6825	12.688	39.6825	15.512	39.6825	26.6211	39.6825	9.515	39.6825	2.4736			39.6795	21.4247	0.18	0.1	0.03
39.7727	22.538					39.7727	51.556	39.7727	18	39.7431	39.945	39.7727	28.761	39.7727	12.097	39.7727	13.355	39.7727	26.515	39.7727	11.898	39.7727	3.0396			39.7697	22.7705	0.2	0.12	0.03
39.8629	26.454					39.8629	48.729			39.8332	34.583	39.8629	25.452	39.8629	8.411	39.8629	17.152	39.8629	13.2748	39.8629	17.325	39.8629	8.7328			39.8596	22.2348	0.19	0.11	0.04
39.9531	24.558					39.9531	48.707			39.9233	28.705	39.9531	22.308	39.9531	9.154	39.9531	5.926	39.9531	16.1786	39.9531	12.367	39.9531	13.2058			39.9498	20.1233	0.17	0.11	0.04
40.0433	27.937					40.0433	54.692			40.0135	21.34	40.0433	27.208	40.0433	14.428	40.0433	1.896	40.0433	10.6799	40.0433	14.617	40.0433	8.824			40.04	20.1802	0.17	0.13	0.04
40.1335	33.993					40.1335	36.707			40.1036	17.121	40.1335	28.386	40.1335	12.275	40.1335	6.113	40.1335	8.968	40.1335	18.583	40.1335	9.7831			40.1302	19.1032	0.16	0.09	0.03
40.2237	32.905					40.2237	36.554			40.1937	22.454	40.2237	29.327	40.2237	10.487	40.2237	7.81	40.2237	13.7453	40.2237	23.502	40.2237	11.2086			40.2204	20.8881	0.18	0.09	0.03
40.3139	33.53					40.3139	35.531			40.2838	24.43	40.3139	36.476	40.3139	16.299	40.3139	8.186	40.3139	21.6289	40.3139	22.676	40.3139	5.9692			40.3106	22.7473	0.19	0.09	0.03
40.404	30.973					40.404	22.063			40.3739	14.787	40.404	36.363	40.404	13.218	40.404	7.295	40.404	16.4657	40.404	25.619	40.404	3.7144			40.4007	18.9442	0.16	0.09	0.03
40.4942	30.129					40.4942	21.76			40.4641	18.655	40.4942	35.729	40.4942	11.801	40.4942	6	40.4942	13.2578	40.4942	28.737	40.4942	3.7022			40.4909	18.8634	0.16	0.09	0.03
40.5844	34.023					40.5844	21.361			40.5542	17.92	40.5844	32.537	40.5844	9.02	40.5844	6.993	40.5844	13.2408	40.5844	17.156	40.5844	2.627			40.581	17.2086	0.15	0.09	0.03
40.6746	42.282					40.6746	17.774			40.6443	19.179	40.6746	39.973	40.6746	16.307	40.6746	12.347	40.6746	12.3983	40.6746	24.956	40.6746	1.6921			40.6712	20.7676	0.18	0.11	0.04
40.7648	50.45					40.7648	8.812			40.7344	22.171	40.7648	49.422	40.7648	14.863	40.7648	5.468	40.7648	11.9148	40.7648	20.11	40.7648	4.8966			40.7614	20.9008	0.18	0.14	0.04
40.855	44.176					40.855	11.955			40.8245	23.743	40.855	57.821	40.855	11.496	40.855	9.393	40.855	11.0505	40.855	22.095	40.855	6.1329			40.8516	21.9847	0.19	0.14	0.04
40.9452	45.585					40.9452	20.732			40.9147	20.252	40.9452	48.563	40.9452	13.389	40.9452	10.783	40.9452	5.9615	40.9452	21.862	40.9452	6.4261			40.9418	21.506	0.18	0.13	0.04
41.0354	37.95					41.0354	18.945			41.0048	25.219	41.0354	44.487	41.0354	4.877	41.0354	6.939	41.0354	9.7152	41.0354	19.519	41.0354	8.0688			41.032	19.5244	0.17	0.11	0.04
41.1255	37.64					41.1255	21.539			41.0949	21.102	41.1255	53.32	41.1255	8.43	41.1255	6.196	41.1255	17.7099	41.1255	19.202	41.1255	5.1893			41.1221	21.1476	0.18	0.13	0.04
41.2157	27.15					41.2157	21.261			41.185	18.506	41.2157	54.955	41.2157	12.214	41.2157	18.452	41.2157	18.1464	41.2157	24.916	41.2157	2.6616			41.2123	22.0291	0.19	0.12	0.04
41.3059	32.21					41.3059	13.639			41.2751	21.448	41.3059	50.736	41.3059	14.625	41.3059	17.799	41.3059	18.73	41.3059	18.788	41.3059	4.5257			41.3025	21.389	0.18	0.11	0.04
41.3961	28.2					41.3961	11.359			41.3653	23.556	41.3961	39.271	41.3961	17.595	41.3961	15.736	41.3961	17.2428	41.3961	18.685	41.3961	7.7302			41.3927	19.9306	0.17	0.08	0.03
41.4863	26.49					41.4863	19.301			41.4554	20.693	41.4863	39.336	41.4863	14.651	41.4863	15.621	41.4863	16.0823	41.4863	15.625	41.4863	6.0792			41.4829	19.3198	0.17	0.07	0.03
41.5765	24.51					41.5765	18.385			41.5455	20.926	41.5765	35.595	41.5765	13.068	41.5765	10.678	41.5765	8.9057	41.5765	17.09	41.5765	5.123			41.5731	17.1423	0.15	0.07	0.03
41.6667	22.95					41.6667	12.854			41.6356	28.962	41.6667	29.31	41.6667	14.559	41.6667	6.661	41.6667	7.2536	41.6667	14.339	41.6667	5.1282			41.6632	15.7796	0.14	0.07	0.03
41.7569	22.05					41.7569	14.781			41.7257	27.141	41.7569	22.555	41.7569	24.166	41.7569	4.893	41.7569	9.2805	41.7569	15.974	41.7569	3.408			41.7534	16.0276	0.14	0.07	0.03
41.847	21.77					41.847	17.499			41.8159	21.07	41.847	20.613	41.847	22.672	41.847	4.859	41.847	6.2841	41.847	15.752	41.847	4.0037			41.8435	14.947	0.13	0.06	0.03
41.9372	25.95					41.9372	12.554			41.906	23.295	41.9372	30.428	41.9372	17.407	41.9372	8.771	41.9372	5.0319	41.9372	14.936	41.9372	6.8773			41.9337	16.1389	0.14	0.07	0.03
42.0274	20.92					42.0274	11.667			41.9961	32.628	42.0274	37.596	42.0274	16.363	42.0274	11.687	42.0274	10.3192	42.0274	14.221	42.0274	5.6147			42.0239	17.8907	0.15	0.09	0.03
42.1176	16					42.1176	14.704			42.0862	40	42.1176	34.724	42.1176	19.705	42.1176	10.447	42.1176	11.2178	42.1176	11.099	42.1176	5.5077			42.1141	18.1561	0.16	0.09	0.03
42.2078	17.18					42.2078	18.601					42.2078	22.721	42.2078	20.896	42.2078	10.372	42.2078	9.457	42.2078	11.24	42.2078	6.836			42.2078	14.6629	0.13	0.05	0.03
42.298	22.72					42.298	16.243					42.298	21.239	42.298	18.592	42.298	15.895	42.298	12.1319	42.298	12.696	42.298	3.2719			42.298	15.3486	0.13	0.05	0.03
42.3882	21.28					42.3882	18.389					42.3882	22.69	42.3882	13.474	42.3882	13.156	42.3882	10.6078	42.3882	11.249	42.3882	1.3004			42.3882	14.0183	0.12	0.05	0.03
42.4784	16.82					42.4784	21.609					42.4784	15.887	42.4784	5.403	42.4784	22.722	42.4784	13.0369	42.4784	14.722	42.4784	4.2559			42.4784	14.307	0.12	0.05	0.03
42.5685	21.9					42.5685	20.267					42.5685	18.589	42.5685	6.071	42.5685	31.738	42.5685	15.4182	42.5685	13.935	42.5685	5.7573			42.5685	16.7094	0.14	0.07	0.03
42.6587	26					42.6587	17.171					42.6587	28.445	42.6587	8.901	42.6587	43.599	42.6587	15.2725	42.6587	11.673	42.6587	6.9086			42.6587	19.7463	0.17	0.1	0.04
42.7489	26					42.7489	22.826					42.7489	27.167	42.7489	11.736	42.7489	22	42.7489	10.3681	42.7489	11.932	42.7489	9.0535			42.7489	17.6353	0.15	0.06	0.03
42.8391	31.31					42.8391	17.797					42.8391	30.239	42.8391	12.009			42.8391	22.1377	42.8391	13.913	42.8391	6.1502			42.8391	19.0794	0.16	0.07	0.04
42.9293	29.1					42.9293	16.692					42.9293	15.422	42.9293	10.436			42.9293	8.4888	42.9293	26.982	42.9293	4.746			42.9293	15.981	0.14	0.07	0.04
43.0195	20.87					43.0195	17.259					43.0195	21.02	43.0195	11.863			43.0195	10.401	43.0195	21.567	43.0195	8.6231			43.0195	15.9433	0.14	0.04	0.03
43.1097	25.67					43.1097	22.146					43.1097	23.442	43.1097	8.98			43.1097	16.2047	43.1097	13.346	43.1097	7.2558			43.1097	16.7206	0.14	0.06	0.03
43.1999	28.05					43.1999	22.136					43.1999	25.961	43.1999	6.355			43.1999	10.6345	43.1999	15.859	43.1999	6.3241			43.1999	16.4742	0.14	0.07	0.04
43.29	25.41					43.29	24.379					43.29	26.304	43.29	9.621			43.29	16.6723	43.29	16.591	43.29	7.4966			43.29	18.0677	0.15	0.06	0.04
43.3802	23.82					43.3802	21.638					43.3802	23.23	43.3802	4.043			43.3802	9.3013	43.3802	13.216	43.3802	8.6122			43.3802	14.8372	0.13	0.06	0.04
43.4704	24.77					43.4704	17.914					43.4704	28.175	43.4704	2.478			43.4704	7.5655	43.4704	13.13	43.4704	8.5199			43.4704	14.6503	0.13	0.07	0.04
43.5606	28.95					43.5606	13.147					43.5606	26.181	43.5606	1.395			43.5606	12.2262	43.5606	13.974	43.5606	4			43.5606	14.2676	0.12	0.08	0.04
43.6508	20.97					43.6508	15.288					43.6508	22.665	43.6508	1.69			43.6508	11.7369	43.6508	12.124	43.6508	6.3305			43.6508	12.9721	0.11	0.06	0.03
43.741	18.13					43.741	21.537					43.741	39.541	43.741	4.842			43.741	13.2928	43.741	10.722	43.741	10.34			43.741	16.915	0.14	0.09	0.04
43.8312	13.92					43.8312	22.663					43.8312	36.689	43.8312	4.886			43.8312	17.019	43.8312	9.768	43.8312	10.4377			43.8312	16.4832	0.14	0.08	0.04
43.9214	15.49					43.9214	21.077					43.9214	27.902	43.9214	4.739			43.9214	18.3024	43.9214	15.372	43.9214	5.9319			43.9214	15.5449	0.13	0.06	0.04
44.0115	10.56					44.0115	17.053					44.0115	26.93	44.0115	4			44.0115	28.2698	44.0115	17.078	44.0115	5.4536			44.0115	15.6206	0.13	0.08	0.04
44.1017	13.44					44.1017	22.469					44.1017	23.51	44.1017	4.244			44.1017	31	44.1017	11.138	44.1017	6.1141			44.1017	15.9879	0.14	0.08	0.04
44.1919	16.46					44.1919	15.557					44.1919	21.905	44.1919	4.957					44.1919	15.177	44.1919	2.9727			44.1919	12.8381	0.11	0.06	0.04
44.2821	11.05					44.2821	20.759					44.2821	16.22	44.2821	4.362					44.2821	11.644	44.2821	4.8901			44.2821	11.4875	0.1	0.05	0.04
44.3723	12.215					44.3723	28.684					44.3723	21.862	44.3723	10.304					44.3723	12.88	44.3723	12.6572			44.3723	16.4337	0.14	0.06	0.04
44.4625	18.161					44.4625	21.368					44.4625	22.404	44.4625	9.115					44.4625	16.504	44.4625	13.5421			44.4625	16.849	0.14	0.04	0.03
44.5527	16.116					44.5527	24.567					44.5527	18.538	44.5527	8.287					44.5527	17.923	44.5527	10.4681			44.5527	15.9832	0.14	0.05	0.04
44.6429	17.584					44.6429	27.703					44.6429	23.601	44.6429	8.096					44.6429	14.315	44.6429	18.0601			44.6429	18.2265	0.16	0.05	0.04
44.733	19.247					44.733	15.714					44.733	15.453	44.733	5.437					44.733	15.066	44.733	22.4731			44.733	15.565	0.13	0.04	0.04
44.8232	17.719					44.8232	14.697					44.8232	23.423	44.8232	2.622					44.8232	14.318	44.8232	17.1699			44.8232	14.9915	0.13	0.05	0.04
44.9134	19.253					44.9134	18.816					44.9134	33.968	44.9134	2.292					44.9134	15.059	44.9134	19.1364			44.9134	18.0874	0.15	0.08	0.05
45.0036	18.927					45.0036	21.143					45.0036	30.891	45.0036	1.834					45.0036	20.668	45.0036	33.1946			45.0036	21.1096	0.18	0.09	0.05
45.0938	21.251					45.0938	22.704					45.0938	29.783	45.0938	0.123					45.0938	19.277	45.0938	16.3518			45.0938	18.2483	0.16	0.08	0.05
45.184	26.958					45.184	19.27					45.184	26.139	45.184	1.17					45.184	15.022	45.184	16.6197			45.184	17.5298	0.15	0.07	0.05
45.2742	21.624					45.2742	23.864					45.2742	17.843	45.2742	5.314					45.2742	18.537	45.2742	14.7358			45.2742	16.9863	0.15	0.05	0.04
45.3644	21.171					45.3644	23.987					45.3644	23.848	45.3644	1.257					45.3644	8.897	45.3644	15.4895			45.3644	15.7749	0.14	0.07	0.04
45.4545	27.644					45.4545	15.241					45.4545	42.442	45.4545	2.42					45.4545	12.692	45.4545	22.9161			45.4545	20.5592	0.18	0.11	0.05
45.5447	28.793					45.5447	15.515					45.5447	26.987	45.5447	3.922					45.5447	12.238	45.5447	17.5753			45.5447	17.5051	0.15	0.07	0.04
45.6349	29.115					45.6349	23.053					45.6349	33.222	45.6349	6.336					45.6349	24.418	45.6349	15.0018			45.6349	21.8576	0.19	0.08	0.05
45.7251	34.841					45.7251	23.383					45.7251	36.244	45.7251	5.594					45.7251	19.069	45.7251	13.6842			45.7251	22.1359	0.19	0.09	0.05
45.8153	22.762					45.8153	24.9					45.8153	37.813	45.8153	2.227					45.8153	17.964	45.8153	12.6931			45.8153	19.7265	0.17	0.09	0.05
45.9055	20.555					45.9055	19.705					45.9055	41.134	45.9055	3.695					45.9055	11.768	45.9055	15.3826			45.9055	18.7066	0.16	0.1	0.05
45.9957	19.292					45.9957	17.573					45.9957	32.492	45.9957	4.731					45.9957	18.702	45.9957	10.2265			45.9957	17.1694	0.15	0.07	0.05
46.0859	25.227					46.0859	22.095					46.0859	32.806	46.0859	11.106					46.0859	16.571	46.0859	9.4679			46.0859	19.5455	0.17	0.07	0.04
46.176	27.13					46.176	15.475					46.176	37	46.176	10.687					46.176	18.292	46.176	8.5741			46.176	19.5264	0.17	0.08	0.05
46.2662	20.223					46.2662	10.581							46.2662	5.713					46.2662	15.821	46.2662	6.7906			46.2662	11.8257	0.1	0.05	0.04
46.3564	27.757					46.3564	14.006							46.3564	8.173					46.3564	21.604	46.3564	8.3027			46.3564	15.9685	0.14	0.07	0.05
46.4466	22.694					46.4466	17.15							46.4466	9.724					46.4466	23.254	46.4466	11.7362			46.4466	16.9116	0.14	0.05	0.04
46.5368	15.091					46.5368	19.283							46.5368	15.272					46.5368	23.166	46.5368	11.8256			46.5368	16.9275	0.15	0.03	0.04
46.627	14.002					46.627	11.659							46.627	22.893					46.627	25.414	46.627	8.419			46.627	16.4774	0.14	0.06	0.05
46.7172	24.541					46.7172	10.107							46.7172	15.732					46.7172	23.811	46.7172	6.4489			46.7172	16.128	0.14	0.06	0.05
46.8074	24.329					46.8074	13.133							46.8074	23.39					46.8074	26.745	46.8074	5.2776			46.8074	18.5749	0.16	0.07	0.05
46.8975	30.372					46.8975	14.903							46.8975	19.689					46.8975	22.566	46.8975	9.5767			46.8975	19.4213	0.17	0.06	0.05
46.9877	31.613					46.9877	14.033							46.9877	22.178					46.9877	13	46.9877	8.2507			46.9877	17.8149	0.15	0.07	0.05
47.0779	41					47.0779	11.74							47.0779	24.536							47.0779	7.8816			47.0779	21.2894	0.18	0.11	0.08
						47.1681	12.281							47.1681	26.891							47.1681	4.7891			47.1681	14.6537	0.13	0.08	0.09
						47.2583	13.907							47.2583	33							47.2583	6.6606			47.2583	17.8559	0.15	0.1	0.1
						47.3485	15.079															47.3485	3.9974			47.3485	9.5382	0.08	0.05	0.11
						47.4387	16.97															47.4387	2.5975			47.4387	9.78375	0.08	0.06	0.12
						47.5289	15.002															47.5289	5.6054			47.5289	10.3037	0.09	0.04	0.1
						47.619	14.345															47.619	3.1878			47.619	8.7664	0.08	0.05	0.11
						47.7092	22.414															47.7092	5.0255			47.7092	13.7197	0.12	0.07	0.14
						47.7994	19.529															47.7994	4.4332			47.7994	11.9811	0.1	0.06	0.13
						47.8896	19.9															47.8896	4.2141			47.8896	12.0571	0.1	0.07	0.13
						47.9798	36.697															47.9798	4.7663			47.9798	20.7316	0.18	0.14	0.18
						48.07	28.419															48.07	5.388			48.07	16.9035	0.14	0.1	0.16
						48.1602	29.693															48.1602	3.4612			48.1602	16.5771	0.14	0.11	0.17
						48.2504	35.497															48.2504	3.2379			48.2504	19.3675	0.17	0.14	0.19
						48.3405	49.648															48.3405	3.5723			48.3405	26.6102	0.23	0.2	0.22
						48.4307	53															48.4307	3.1124			48.4307	28.0562	0.24	0.21	0.23
																						48.5209	4.525			48.5209	4.525	0.04	0	0
																						48.6111	2.8109			48.6111	2.8109	0.02	0	0
																						48.7013	4.5204			48.7013	4.5204	0.04	0	0
																						48.7915	4.5014			48.7915	4.5014	0.04	0	0
																						48.8817	3.6958			48.8817	3.6958	0.03	0	0
																						48.9719	2.8159			48.9719	2.8159	0.02	0	0
																						49.062	2.8568			49.062	2.8568	0.02	0	0
																						49.1522	3.9193			49.1522	3.9193	0.03	0	0
																						49.2424	0.4882			49.2424	0.4882	0	0	0
																						49.3326	5.9831			49.3326	5.9831	0.05	0	0
																						49.4228	12.496			49.4228	12.496	0.11	0	0
																						49.513	9.9509			49.513	9.9509	0.09	0	0
																						49.6032	7.5053			49.6032	7.5053	0.06	0	0
																						49.6934	10.2959			49.6934	10.2959	0.09	0	0
																						49.7835	5.4932			49.7835	5.4932	0.05	0	0
																						49.8737	1.6287			49.8737	1.6287	0.01	0	0
																						49.9639	3.9583			49.9639	3.9583	0.03	0	0
																						50.0541	6.338			50.0541	6.338	0.05	0	0
																						50.1443	8.9773			50.1443	8.9773	0.08	0	0
																						50.2345	9.6263			50.2345	9.6263	0.08	0	0
																						50.3247	9.1631			50.3247	9.1631	0.08	0	0
																						50.4149	7.0442			50.4149	7.0442	0.06	0	0
																						50.505	8.8378			50.505	8.8378	0.08	0	0
																						50.5952	7.6432			50.5952	7.6432	0.07	0	0
																						50.6854	8.825			50.6854	8.825	0.08	0	0
																						50.7756	15.5597			50.7756	15.5597	0.13	0	0
																						50.8658	15.4009			50.8658	15.4009	0.13	0	0
																						50.956	14.7536			50.956	14.7536	0.13	0	0
																						51.0462	22.2542			51.0462	22.2542	0.19	0	0
																						51.1364	21.4075			51.1364	21.4075	0.18	0	0
																						51.2265	8.3201			51.2265	8.3201	0.07	0	0
																						51.3167	11.9275			51.3167	11.9275	0.1	0	0
																						51.4069	15.0252			51.4069	15.0252	0.13	0	0
																						51.4971	14.6249			51.4971	14.6249	0.13	0	0
																						51.5873	26			51.5873	26	0.22	0	0
