# Supplementary material for: Opposite polarity programs regulate asymmetric subsidiary cell divisions in grasses
Source: eLife. 2022 Dec 20;11:e79913. doi: 10.7554/eLife.79913 (PMC9767456; doi:10.7554/eLife.79913)
Supplement: Figure 3—figure supplement 1—source data 1. [file elife-79913-fig3-figsupp1-data1.xlsx]

## Sheet: Tabelle1
Dosage of BdPOLAR is crucial for its function.
Fig. S4B. Quantifications of defective SCs in WT and bdpan1-1 with or without BdPOLARp:BdPOLAR-mVenus expression.				Fig. S4D. Quantifications of defective SCs in WT, bdpolar-1 complemented with weakly and strongly expressed BdPOLARp:BdPOLAR-mVenus, and bdpolar-1 control.				Fig. S4F. Quantifications of defective SCs in WT and bdpolar-1 with or without BdPAN1p:BdPAN1-YFP expression.				Fig. S4H.Quantifications of defective SCs of WT, bdpan1-1 complemented with BdPAN1p:BdPAN1-YFP, and bdpan1-1 control.				Fig. S4J. Quantifications of defective SCs of WT and WT with ZmUbip:BdPOLAR-mVenus expression.
genotypes	defective SCs	SCs		genotypes	defective SCs	SCs		genotypes	defective SCs	SCs		genotypes	defective SCs	SCs		genotypes	defective SCs	SCs
WT with BdPOLARp: BdPOLAR-mVenus	11	92		bdpolar-1 with weak BdPOLARp: BdPOLAR-mVenus	6	95		bdpolar-1 with BdPAN1p: BdPAN1-YFP	29	136		WT	1	116		WT with ZmUbip: BdPOLAR-mVenus	9	116
WT with BdPOLARp: BdPOLAR-mVenus	14	86		bdpolar-1 with weak BdPOLARp: BdPOLAR-mVenus	14	78		bdpolar-1 with BdPAN1p: BdPAN1-YFP	35	108		WT	0	146		WT with ZmUbip: BdPOLAR-mVenus	12	108
WT with BdPOLARp: BdPOLAR-mVenus	2	92		bdpolar-1 with weak BdPOLARp: BdPOLAR-mVenus	10	102		bdpolar-1 with BdPAN1p: BdPAN1-YFP	51	124		WT	1	110		WT with ZmUbip: BdPOLAR-mVenus	7	106
WT with BdPOLARp: BdPOLAR-mVenus	3	80		bdpolar-1 with weak BdPOLARp: BdPOLAR-mVenus	8	90		bdpolar-1 with BdPAN1p: BdPAN1-YFP	51	128		WT	1	68		WT with ZmUbip: BdPOLAR-mVenus	13	118
WT with BdPOLARp: BdPOLAR-mVenus	25	70		bdpolar-1 with weak BdPOLARp: BdPOLAR-mVenus	11	76		bdpolar-1 with BdPAN1p: BdPAN1-YFP	31	132		WT	2	86		WT with ZmUbip: BdPOLAR-mVenus	13	102
WT with BdPOLARp: BdPOLAR-mVenus	10	90		bdpolar-1 with weak BdPOLARp: BdPOLAR-mVenus	8	76		bdpolar-1 with BdPAN1p: BdPAN1-YFP	30	92		bdpan1-1 with BdPAN1p: BdPAN1-YFP	4	106		WT with ZmUbip: BdPOLAR-mVenus	8	118
WT with BdPOLARp: BdPOLAR-mVenus	5	90		bdpolar-1 with weak BdPOLARp: BdPOLAR-mVenus	8	82		bdpolar-1 with BdPAN1p: BdPAN1-YFP	27	96		bdpan1-1 with BdPAN1p: BdPAN1-YFP	3	112		WT with ZmUbip: BdPOLAR-mVenus	11	104
WT with BdPOLARp: BdPOLAR-mVenus	6	89		bdpolar-1 with weak BdPOLARp: BdPOLAR-mVenus	11	86		bdpolar-1 with BdPAN1p: BdPAN1-YFP	33	79		bdpan1-1 with BdPAN1p: BdPAN1-YFP	3	100		WT with ZmUbip: BdPOLAR-mVenus	9	102
WT with BdPOLARp: BdPOLAR-mVenus	12	118		bdpolar-1 with weak BdPOLARp: BdPOLAR-mVenus	18	72		bdpolar-1 with BdPAN1p: BdPAN1-YFP	29	98		bdpan1-1 with BdPAN1p: BdPAN1-YFP	5	114		WT with ZmUbip: BdPOLAR-mVenus	7	104
WT with BdPOLARp: BdPOLAR-mVenus	10	122		bdpolar-1 with weak BdPOLARp: BdPOLAR-mVenus	6	78		bdpolar-1 with BdPAN1p: BdPAN1-YFP	27	102		bdpan1-1 with BdPAN1p: BdPAN1-YFP	30	82		WT	6	104
WT with BdPOLARp: BdPOLAR-mVenus	7	90		bdpolar-1 with strong BdPOLARp: BdPOLAR-mVenus	25	88		bdpolar-1 with BdPAN1p: BdPAN1-YFP	38	88		bdpan1-1	35	86		WT	2	138
WT with BdPOLARp: BdPOLAR-mVenus	1	74		bdpolar-1 with strong BdPOLARp: BdPOLAR-mVenus	32	82		bdpolar-1 with BdPAN1p: BdPAN1-YFP	33	88		bdpan1-1	32	90		WT	6	110
WT with BdPOLARp: BdPOLAR-mVenus	4	76		bdpolar-1 with strong BdPOLARp: BdPOLAR-mVenus	31	86		WT with BdPAN1p: BdPAN1-YFP	8	132		bdpan1-1	45	96		WT	3	108
WT with BdPOLARp: BdPOLAR-mVenus	10	76		bdpolar-1 with strong BdPOLARp: BdPOLAR-mVenus	29	78		WT with BdPAN1p: BdPAN1-YFP	1	118		bdpan1-1	29	76		WT	2	108
WT with BdPOLARp: BdPOLAR-mVenus	17	74		bdpolar-1 with strong BdPOLARp: BdPOLAR-mVenus	21	84		WT with BdPAN1p: BdPAN1-YFP	0	100		bdpan1-1	30	90
WT with BdPOLARp: BdPOLAR-mVenus	18	82		bdpolar-1 with strong BdPOLARp: BdPOLAR-mVenus	26	80		WT with BdPAN1p: BdPAN1-YFP	3	88
WT with BdPOLARp: BdPOLAR-mVenus	20	82		bdpolar-1 with strong BdPOLARp: BdPOLAR-mVenus	16	90		WT with BdPAN1p: BdPAN1-YFP	2	88
WT with BdPOLARp: BdPOLAR-mVenus	17	72		bdpolar-1 with strong BdPOLARp: BdPOLAR-mVenus	23	82		WT with BdPAN1p: BdPAN1-YFP	2	94
WT with BdPOLARp: BdPOLAR-mVenus	18	68		bdpolar-1 with strong BdPOLARp: BdPOLAR-mVenus	18	74		WT with BdPAN1p: BdPAN1-YFP	3	82
WT with BdPOLARp: BdPOLAR-mVenus	7	70		WT	1	116		WT with BdPAN1p: BdPAN1-YFP	6	98
WT with BdPOLARp: BdPOLAR-mVenus	21	72		WT	0	146		WT with BdPAN1p: BdPAN1-YFP	3	90
WT with BdPOLARp: BdPOLAR-mVenus	28	82		WT	1	110		WT with BdPAN1p: BdPAN1-YFP	5	92
WT with BdPOLARp: BdPOLAR-mVenus	28	80		WT	1	68		bdpolar-1	35	80
WT with BdPOLARp: BdPOLAR-mVenus	36	106		WT	2	86		bdpolar-1	49	110
WT with BdPOLARp: BdPOLAR-mVenus	35	67		bdpolar-1	21	108		bdpolar-1	31	94
WT with BdPOLARp: BdPOLAR-mVenus	38	112		bdpolar-1	16	64		bdpolar-1	20	82
WT with BdPOLARp: BdPOLAR-mVenus	18	72		bdpolar-1	24	98		bdpolar-1	30	94
WT with BdPOLARp: BdPOLAR-mVenus	30	72		bdpolar-1	22	82		bdpolar-1	31	100
WT with BdPOLARp: BdPOLAR-mVenus	21	86		bdpolar-1	27	76		WT	7	120
WT with BdPOLARp: BdPOLAR-mVenus	18	80						WT	1	107
WT with BdPOLARp: BdPOLAR-mVenus	8	76						WT	3	84
WT with BdPOLARp: BdPOLAR-mVenus	24	76						WT	3	90
WT with BdPOLARp: BdPOLAR-mVenus	18	80						WT	4	90
WT with BdPOLARp: BdPOLAR-mVenus	23	94						WT	0	90
WT with BdPOLARp: BdPOLAR-mVenus	3	104						WT	1	108
WT with BdPOLARp: BdPOLAR-mVenus	3	66						WT	1	102
WT	3	88						WT	4	98
WT	2	82
WT	4	108
WT	2	100
WT	1	88
WT	3	78
WT	1	78
WT	2	62
WT	0	78
bdpan1-1 with BdPOLARp: BdPOLAR-mVenus	46	56
bdpan1-1 with BdPOLARp: BdPOLAR-mVenus	81	112
bdpan1-1 with BdPOLARp: BdPOLAR-mVenus	55	70
bdpan1-1 with BdPOLARp: BdPOLAR-mVenus	56	68
bdpan1-1 with BdPOLARp: BdPOLAR-mVenus	69	75
bdpan1-1 with BdPOLARp: BdPOLAR-mVenus	62	80
bdpan1-1 with BdPOLARp: BdPOLAR-mVenus	69	84
bdpan1-1 with BdPOLARp: BdPOLAR-mVenus	64	88
bdpan1-1 with BdPOLARp: BdPOLAR-mVenus	54	66
bdpan1-1 with BdPOLARp: BdPOLAR-mVenus	61	80
bdpan1-1 with BdPOLARp: BdPOLAR-mVenus	54	74
bdpan1-1 with BdPOLARp: BdPOLAR-mVenus	72	82
bdpan1-1 with BdPOLARp: BdPOLAR-mVenus	46	51
bdpan1-1 with BdPOLARp: BdPOLAR-mVenus	62	80
bdpan1-1 with BdPOLARp: BdPOLAR-mVenus	58	78
bdpan1-1 with BdPOLARp: BdPOLAR-mVenus	64	76
bdpan1-1 with BdPOLARp: BdPOLAR-mVenus	73	90
bdpan1-1 with BdPOLARp: BdPOLAR-mVenus	67	78
bdpan1-1 with BdPOLARp: BdPOLAR-mVenus	72	76
bdpan1-1 with BdPOLARp: BdPOLAR-mVenus	68	74
bdpan1-1 with BdPOLARp: BdPOLAR-mVenus	79	90
bdpan1-1 with BdPOLARp: BdPOLAR-mVenus	64	70
bdpan1-1 with BdPOLARp: BdPOLAR-mVenus	89	96
bdpan1-1 with BdPOLARp: BdPOLAR-mVenus	79	84
bdpan1-1 with BdPOLARp: BdPOLAR-mVenus	57	66
bdpan1-1 with BdPOLARp: BdPOLAR-mVenus	85	94
bdpan1-1 with BdPOLARp: BdPOLAR-mVenus	59	64
bdpan1-1 with BdPOLARp: BdPOLAR-mVenus	80	88
bdpan1-1 with BdPOLARp: BdPOLAR-mVenus	67	72
bdpan1-1 with BdPOLARp: BdPOLAR-mVenus	75	76
bdpan1-1 with BdPOLARp: BdPOLAR-mVenus	85	95
bdpan1-1 with BdPOLARp: BdPOLAR-mVenus	79	88
bdpan1-1 with BdPOLARp: BdPOLAR-mVenus	62	66
bdpan1-1 with BdPOLARp: BdPOLAR-mVenus	88	100
bdpan1-1 with BdPOLARp: BdPOLAR-mVenus	48	64
bdpan1-1 with BdPOLARp: BdPOLAR-mVenus	67	76
bdpan1-1 with BdPOLARp: BdPOLAR-mVenus	63	70
bdpan1-1 with BdPOLARp: BdPOLAR-mVenus	87	100
bdpan1-1	26	84
bdpan1-1	21	84
bdpan1-1	14	74
bdpan1-1	37	98
bdpan1-1	33	112
bdpan1-1	28	88
bdpan1-1	19	88
bdpan1-1	36	78
bdpan1-1	24	88
