# Supplementary material for: Opposite polarity programs regulate asymmetric subsidiary cell divisions in grasses
Source: eLife. 2022 Dec 20;11:e79913. doi: 10.7554/eLife.79913 (PMC9767456; doi:10.7554/eLife.79913)
Supplement: Figure 3—source data 1. [file elife-79913-fig3-data1.xlsx]

## Sheet: BdPOLAR-mVenus
Quantification of the polarity index of BdPOLAR-mVenus in WT (n=29 SMCs) and bdpan1-1 (n=22 SMCs); Fluorescence intensity at each measured angle is presented here.
	BdPOLARp: BdPOLAR-mVenus in WT
Angle	C01	C02	C03	C04	C05	C06	C07	C08	C09	C10	C11	C12	C13	C14	C15	C16	C17	C18	C19	C20	C21	C22	C23	C24	C25	C26	C27	C28	C29
1	73	102	57	181	56	83	39	28	114	131	67	105	120	130	37	77	139	195	122	51	177	89	33	75	38	62	68	35	109
2	80	62	69	141	69	85	49	31	141	104	97	70	104	147	64	85	136	135	106	43	164	95	38	69	45	73	58	61	94
3	96	61	87	143	79	91	65	39	137	122	114	56	133	163	55	58	133	124	99	57	168	86	40	73	38	101	54	76	98
4	75	94	92	143	82	100	56	42	166	97	99	48	135	145	46	59	156	119	93	67	179	90	50	74	45	122	67	97	106
5	40	108	125	135	96	110	67	37	169	78	99	50	125	151	51	63	147	131	97	66	179	91	51	62	58	114	71	105	105
6	36	84	105	115	90	106	55	33	127	69	97	58	135	123	41	75	116	149	108	63	198	118	48	62	57	69	95	111	120
7	60	63	100	102	83	102	43	40	124	51	99	74	112	92	33	70	107	166	97	49	223	90	50	69	55	74	111	108	69
8	67	48	92	70	78	95	43	33	112	56	96	90	123	76	39	75	68	171	92	48	193	55	54	73	34	104	127	118	83
9	53	39	99	74	68	72	44	29	126	52	80	82	151	72	46	69	60	163	82	48	178	40	42	56	45	134	141	96	96
10	48	62	103	60	74	85	42	32	127	78	91	80	121	72	46	63	70	151	107	67	210	40	32	55	44	130	124	99	109
11	37	57	130	58	73	73	48	43	120	88	91	80	144	98	61	70	87	172	116	69	193	74	38	54	31	110	113	93	93
12	52	61	141	64	71	89	63	32	125	83	117	70	82	127	52	94	110	150	116	66	178	81	35	63	22	112	98	117	131
13	46	79	134	64	69	88	45	56	156	85	101	76	63	151	48	112	104	171	120	90	142	63	37	69	23	102	85	97	126
14	54	98	138	107	76	116	33	50	129	78	99	50	91	137	41	86	67	163	123	88	109	47	37	72	22	80	104	95	118
15	60	70	115	143	87	106	36	34	113	80	125	66	143	117	38	98	63	160	127	69	83	47	37	75	20	85	110	91	142
16	62	73	121	150	71	90	36	41	120	64	115	84	131	120	37	90	56	169	118	77	100	39	32	67	28	82	148	74	140
17	38	66	118	151	74	73	57	34	129	122	126	68	129	165	46	110	59	154	124	86	100	52	35	69	30	104	141	71	127
18	32	81	139	150	76	86	78	32	147	120	119	64	115	189	51	103	56	165	111	94	112	52	46	72	43	122	146	64	132
19	45	95	147	151	67	126	83	52	178	100	127	64	131	194	50	84	73	157	132	73	130	59	41	58	38	87	136	84	134
20	42	124	138	170	72	141	52	57	152	110	116	62	153	179	62	93	80	152	126	77	171	65	37	60	36	92	148	79	110
21	73	157	132	194	70	193	69	37	146	102	112	80	104	167	59	97	92	169	122	97	189	75	40	66	36	113	154	85	137
22	82	131	127	219	73	156	56	33	152	102	111	96	108	174	63	79	93	165	120	80	185	45	41	66	33	108	157	70	145
23	87	101	140	204	79	144	50	39	130	96	106	84	115	175	54	82	69	193	122	78	203	50	37	72	36	110	163	87	133
24	88	113	126	205	81	134	51	47	155	98	100	95	149	179	56	111	46	164	138	95	186	41	47	72	53	116	145	88	137
25	93	115	134	199	86	140	49	34	148	102	87	83	146	178	55	100	88	154	167	113	177	49	38	76	63	108	141	87	142
26	78	92	131	202	76	119	50	45	141	88	87	80	135	181	63	85	125	159	134	94	165	67	48	81	62	109	143	92	152
27	88	99	151	210	74	127	54	38	145	93	97	91	119	186	51	75	136	135	130	101	217	98	47	66	60	115	125	68	125
28	65	110	152	204	81	119	48	46	136	105	98	97	132	169	65	73	117	164	136	78	139	80	40	79	66	128	134	78	139
29	63	100	148	201	87	136	45	47	148	119	95	84	117	183	51	62	95	164	133	94	160	94	41	74	76	135	91	83	130
30	67	106	145	213	81	130	46	48	151	109	83	81	145	162	50	100	100	159	118	105	138	92	40	66	50	145	93	75	119
31	66	100	118	196	70	127	49	48	162	106	95	86	142	179	53	54	100	185	151	101	120	72	40	76	53	153	95	79	151
32	64	107	133	161	69	159	53	49	152	105	81	87	142	144	51	58	100	178	147	103	124	76	41	57	43	144	107	65	124
33	56	103	144	158	79	179	51	58	163	112	75	88	122	157	50	68	111	162	155	103	128	67	41	63	32	136	115	78	137
34	68	130	160	159	83	158	69	47	167	122	91	88	160	167	65	72	112	168	166	87	134	86	38	77	47	146	122	71	150
35	74	115	143	160	87	140	59	43	161	126	94	81	156	155	52	87	120	154	169	112	145	76	46	77	47	151	125	108	142
36	90	114	150	167	87	142	56	38	171	114	88	80	140	144	66	71	132	132	156	93	148	77	33	86	47	137	125	116	140
37	77	116	118	180	67	126	56	48	161	119	92	77	162	147	55	75	157	138	135	91	152	85	36	71	57	159	141	115	142
38	94	111	103	176	58	139	59	52	175	139	99	78	156	167	63	74	136	141	158	84	152	105	33	83	54	136	136	102	119
39	91	106	145	189	63	138	74	47	149	127	95	89	156	142	60	50	108	156	152	87	238	88	47	83	46	158	135	109	148
40	97	95	126	183	64	122	70	50	165	100	92	90	147	169	65	73	121	137	158	87	202	92	55	71	45	136	139	88	156
41	98	116	137	161	68	136	64	47	157	108	82	79	147	178	65	97	121	112	118	85	189	90	48	69	44	149	149	103	143
42	99	134	134	177	62	145	63	40	157	121	106	62	148	178	79	112	125	84	118	98	187	99	33	68	40	144	116	89	115
43	84	119	161	189	80	144	49	46	183	108	99	72	144	194	84	89	123	73	93	95	177	76	14	69	43	149	148	104	145
44	80	126	149	189	70	151	54	58	187	106	107	74	163	172	55	94	135	68	72	95	197	80	24	68	56	158	136	113	120
45	76	107	141	191	83	111	53	45	183	114	94	80	147	149	48	88	142	61	63	78	193	75	35	43	60	155	151	122	95
46	82	104	130	197	108	132	58	39	132	108	88	74	160	161	33	99	132	64	56	80	187	81	37	27	51	135	150	91	68
47	86	118	129	200	80	124	56	42	99	127	64	78	168	144	50	101	125	68	70	61	191	75	29	33	61	145	143	60	52
48	80	91	131	198	54	137	50	51	128	118	45	77	164	155	41	109	106	89	68	79	203	75	17	36	52	166	151	39	37
49	78	113	135	184	45	144	51	49	123	132	45	68	166	196	55	89	101	122	76	76	197	70	13	47	64	165	120	30	38
50	85	116	145	174	59	142	49	45	118	124	48	73	144	158	49	97	113	139	82	76	204	91	11	50	59	158	130	44	36
51	64	110	130	181	67	128	54	51	110	116	82	59	151	149	48	99	104	187	92	75	178	103	9	47	51	150	139	52	48
52	86	102	105	181	54	134	65	49	86	119	93	37	153	137	41	110	101	174	100	89	200	87	10	55	55	88	135	60	55
53	72	121	71	190	35	134	66	38	73	122	71	34	167	131	32	109	96	177	111	100	206	94	11	42	53	86	117	58	86
54	62	91	76	192	39	148	69	29	67	118	69	47	162	149	37	62	84	192	117	83	223	85	17	41	50	95	127	45	103
55	63	90	95	209	39	151	61	26	69	131	54	71	158	138	39	58	90	173	103	64	185	88	15	32	53	124	137	35	97
56	80	87	116	185	44	162	69	40	76	133	48	96	163	119	34	63	98	189	124	63	218	85	25	26	43	113	138	39	105
57	108	90	118	175	58	147	66	35	80	133	45	87	95	146	33	56	109	169	133	54	203	87	28	21	42	110	152	32	106
58	88	100	126	186	81	158	71	27	114	153	54	78	61	136	48	67	128	166	117	50	215	80	22	17	43	91	150	31	96
59	74	115	117	189	62	157	72	22	122	144	74	16	107	145	53	53	118	175	125	45	210	80	26	20	44	78	146	46	112
60	81	114	105	192	61	158	63	23	126	113	83	15	145	160	47	46	135	177	129	47	194	73	17	23	49	69	113	54	122
61	82	108	86	163	52	158	43	22	117	76	74	75	156	126	60	52	146	184	127	45	176	83	22	47	33	56	86	75	97
62	74	114	60	190	47	115	43	29	147	85	45	21	176	119	32	52	128	183	101	48	165	80	20	47	45	52	75	71	112
63	70	95	49	180	47	125	44	26	112	92	48	19	152	114	36	59	138	193	119	43	163	90	32	33	42	59	71	31	98

## Sheet: BdPAN1-YFP
Quantification of the polarity index of BdPAN1-YFP in WT (n=19 SMCs) and bdpolar-1 (n=33 SMCs); Fluorescence intensity at each measured angle is presented here.
	BdPAN1p: BdPAN1-YFP in WT
Angle	C01	C02	C03	C04	C05	C06	C07	C08	C09	C10	C11	C12	C13	C14	C15	C16	C17	C18	C19
1	11	7	15	8	11	11	5	8	4	6	9	9	9	5	6	5	5	3	8
2	9	9	7	8	11	18	6	8	3	8	8	6	12	2	3	5	8	3	5
3	8	8	9	22	8	22	9	8	3	8	7	4	10	5	4	7	8	2	3
4	8	10	7	8	8	31	9	10	4	6	7	10	12	2	4	5	4	2	5
5	10	14	10	10	10	34	12	8	3	6	13	6	14	5	7	4	6	5	7
6	9	10	11	6	12	19	9	8	5	5	6	6	10	11	5	10	3	2	10
7	6	7	7	9	10	20	5	8	4	7	10	4	5	10	2	7	4	3	5
8	7	12	9	10	10	21	11	11	6	7	7	5	6	8	8	6	4	5	5
9	15	20	11	12	18	16	5	7	9	6	8	6	5	7	6	6	5	4	7
10	20	13	7	7	41	19	4	10	8	6	7	8	9	7	7	9	6	4	13
11	10	16	6	8	29	26	8	9	6	9	17	6	6	7	6	12	8	4	6
12	7	18	10	8	31	28	7	7	4	5	10	13	6	6	6	5	4	3	6
13	7	15	6	11	35	18	10	6	5	12	6	8	8	6	14	6	5	3	5
14	10	21	11	7	25	14	7	10	6	10	8	8	5	8	4	5	3	3	7
15	10	12	11	8	15	15	7	11	6	5	11	6	9	8	5	5	5	7	6
16	6	9	13	9	20	15	17	7	8	5	9	9	7	8	2	5	4	4	7
17	5	7	14	9	32	14	5	11	5	6	8	7	5	7	4	6	5	3	6
18	6	11	12	7	14	15	3	20	8	9	13	5	12	7	3	7	3	5	6
19	5	15	10	8	11	13	4	12	6	5	8	6	10	4	3	8	8	3	5
20	5	41	8	6	9	13	5	15	9	6	9	8	9	5	4	6	12	5	7
21	6	78	5	11	9	19	4	8	6	11	8	9	11	3	4	6	5	4	7
22	7	57	6	12	11	26	4	12	11	7	8	9	10	3	6	4	6	7	8
23	7	48	28	8	11	24	5	8	7	11	6	10	10	4	11	8	3	8	10
24	8	42	51	12	13	29	6	8	4	9	7	14	20	9	4	7	4	6	6
25	11	48	37	15	15	33	21	10	5	7	9	16	26	8	5	9	5	5	5
26	26	63	35	14	24	37	10	10	4	10	11	12	29	21	2	14	5	2	5
27	13	60	46	34	43	31	10	9	5	22	18	24	16	21	4	17	5	5	6
28	11	70	37	57	70	32	5	26	4	37	31	25	23	19	7	32	6	9	5
29	9	77	25	70	66	59	20	9	9	53	52	39	22	16	19	44	5	9	2
30	19	48	11	56	90	102	39	11	16	41	50	33	23	19	35	44	6	24	5
31	28	30	7	34	100	123	76	17	15	35	42	37	25	19	36	31	11	24	12
32	25	18	7	81	89	94	59	49	26	37	39	38	16	14	40	26	37	19	25
33	34	14	2	25	104	113	45	76	17	53	48	23	13	10	35	22	46	16	39
34	30	7	4	15	122	117	42	59	17	49	12	7	7	5	31	37	25	16	23
35	25	5	6	19	114	84	47	58	23	46	7	13	6	7	37	31	21	15	25
36	16	12	4	13	59	18	102	62	17	41	10	12	9	6	42	36	16	17	37
37	22	7	5	16	13	56	80	67	12	31	15	8	9	11	29	20	44	7	22
38	28	7	4	11	14	28	25	62	7	19	11	9	7	9	10	10	38	4	8
39	27	9	4	8	10	12	9	44	4	7	13	10	8	5	7	4	10	4	6
40	28	16	5	19	13	14	7	33	4	7	9	6	15	3	7	6	5	3	4
41	32	7	5	10	48	17	7	18	5	9	12	8	11	3	5	7	4	4	8
42	18	11	6	8	16	12	5	12	5	7	15	14	10	3	5	6	6	5	10
43	14	10	5	9	12	12	8	14	5	8	19	14	11	2	3	9	5	4	4
44	11	10	19	23	12	15	10	11	4	9	9	17	12	4	7	5	9	7	2
45	9	10	9	12	11	15	9	11	6	14	7	15	7	5	13	6	7	7	2
46	5	19	6	10	8	20	8	16	6	12	8	8	8	5	5	7	9	7	3
47	5	11	8	10	9	24	6	12	7	6	14	7	8	5	4	5	11	4	4
48	5	13	6	10	14	19	6	9	7	8	12	6	9	4	4	5	10	5	2
49	9	30	7	8	15	13	24	10	8	6	10	6	9	4	5	4	8	2	4
50	8	11	13	8	47	17	20	9	8	6	9	5	11	9	3	10	9	5	4
51	9	12	9	7	12	17	9	11	5	7	9	8	7	5	4	10	4	5	4
52	6	10	4	13	8	13	10	15	6	14	11	7	10	6	5	6	3	4	3
53	7	11	5	15	14	15	9	7	8	6	7	11	13	5	9	5	4	5	3
54	4	13	6	17	11	16	9	11	7	8	6	9	7	4	6	4	4	4	4
55	4	21	6	20	16	14	11	7	10	9	14	7	9	3	4	4	3	4	16
56	4	33	8	27	12	19	13	9	6	6	13	10	7	4	4	5	3	2	7
57	6	36	4	21	11	17	9	13	7	6	14	6	10	4	7	6	3	3	6
58	9	13	7	17	8	15	10	10	4	8	11	11	7	3	6	6	2	2	5
59	11	9	7	6	8	9	8	15	5	5	11	5	11	4	4	8	4	2	10
60	12	8	15	9	10	16	11	10	4	8	11	12	15	6	6	10	4	5	9
61	8	10	15	7	12	14	7	8	6	15	7	17	12	4	9	7	5	4	6
62	15	6	14	7	10	15	6	8	5	17	7	9	8	7	7	7	3	3	4
63	8	6	16	8	7	16	9	9	5	11	7	7	10	4	8	7	4	2	6
