# Supplementary material for: Opposite polarity programs regulate asymmetric subsidiary cell divisions in grasses
Source: eLife. 2022 Dec 20;11:e79913. doi: 10.7554/eLife.79913 (PMC9767456; doi:10.7554/eLife.79913)
Supplement: Figure 4—figure supplement 1—source data 1. [file elife-79913-fig4-figsupp1-data1.xlsx]

## Sheet: A_distance WT
a distance distribution with different GMC length/width ratio in SMCs of WT.
SMCs	GMC.L (µm)	GMC.W (µm)	GMC.ratio.L.W.	SC.a (µm)	number	Replicate
001_1	4.42	5.549	0.79654	3.567	1	R3
001_2	3.716	5.535	0.671364	3.01	2	R3
001_3	3.611	5.521	0.654048	3.216	3	R3
001_4	3.611	5.521	0.654048	3.187	4	R3
003_1	5.086	5.795	0.877653	3.166	5	R3
003_2	5.086	5.795	0.877653	3.751	6	R3
004_1	4.465	4.87	0.916838	3.38	7	R3
004_2	5.153	5.823	0.884939	3.934	8	R3
004_3	5.153	5.823	0.884939	2.976	9	R3
005_1	5.054	4.97	1.0169	3.194	10	R3
005_2	5.054	4.97	1.0169	2.995	11	R3
005_3	5.532	4.089	1.3529	2.538	12	R3
005_4	4.3	4.512	0.953014	3.269	13	R3
005_5	4.3	4.512	0.953014	2.986	14	R3
005_6	5.718	3.552	1.6098	3.367	15	R3
006_1	4.695	5.018	0.935632	2.892	16	R3
006_2	4.511	5.508	0.818991	2.48	17	R3
006_3	4.584	5.55	0.825946	3.032	18	R3
006_4	4.584	5.55	0.825946	2.795	19	R3
007_1	3.517	6.198	0.567441	3.878	20	R3
007_2	4.961	6.316	0.785465	4.04	21	R3
007_3	5.231	6.229	0.839782	4.038	22	R3
009_1	3.938	5.592	0.70422	3.774	23	R3
009_2	3.882	5.413	0.717162	3.128	24	R3
009_3	4.57	4.993	0.915281	3.68	25	R3
010_1	5.081	5.562	0.91352	3.159	26	R3
010_2	5.081	5.562	0.91352	2.798	27	R3
010_3	5.023	5.296	0.948452	3.548	28	R3
010_4	4.692	5.299	0.88545	3.959	29	R3
010_5	4.692	5.299	0.88545	3.309	30	R3
010_6	4.399	6.091	0.722213	2.697	31	R3
010_7	4.399	6.091	0.722213	3.48	32	R3
010_8	3.703	6.229	0.594477	2.529	33	R3
011_1	5.013	4.227	1.18595	2.947	34	R3
011_2	3.901	5.3	0.736038	3.486	35	R3
011_3	3.901	5.3	0.736038	2.995	36	R3
011_4	3.818	5.202	0.733948	2.909	37	R3
011_5	3.743	5.622	0.665777	2.81	38	R3
011_6	5.021	4.993	1.00561	2.13	39	R3
011_7	5.021	4.993	1.00561	2.708	40	R3
012_1	4.631	5.863	0.789869	4.098	41	R3
012_2	4.631	5.863	0.789869	4.805	42	R3
012_3	4.51	5.243	0.860195	3.058	43	R3
012_4	4.51	5.243	0.860195	3.834	44	R3
013_1	4.809	6.05	0.794876	3.885	45	R3
013_2	4.809	6.05	0.794876	3.199	46	R3
013_3	4.399	5.913	0.743954	3.34	47	R3
013_4	4.419	6.232	0.709082	2.864	48	R3
013_5	4.315	6.064	0.711577	2.916	49	R3
013_6	4.315	6.064	0.711577	2.945	50	R3
014_1	5.264	5.577	0.943877	3.426	51	R3
014_2	4.329	5.952	0.727319	4.231	52	R3
014_3	4.329	5.952	0.727319	5.254	53	R3
014_4	5.006	5.705	0.877476	3.184	54	R3
014_5	5.006	5.705	0.877476	2.999	55	R3
014_6	4.712	5.863	0.803684	2.892	56	R3
015_1	5.712	5.898	0.968464	3.326	57	R3
015_2	5.712	5.898	0.968464	3.058	58	R3
015_3	5.411	5.236	1.03342	3.923	59	R3
015_4	4.195	6.516	0.6438	4.722	60	R3
015_5	4.51	6.524	0.691294	4.015	61	R3
015_6	4.713	7.028	0.670603	3.561	62	R3
015_7	4.713	7.028	0.670603	4.197	63	R3
016_1	4.962	5.037	0.98511	3.557	64	R3
016_2	4.451	4.659	0.955355	3.818	65	R3
016_3	4.532	5.233	0.866042	3.136	66	R3
016_4	4.487	5.569	0.80571	2.8	67	R3
016_5	5.978	5.891	1.01477	3.761	68	R3
016_6	5.978	5.891	1.01477	3.469	69	R3
017_1	4.277	4.43	0.965463	2.709	70	R3
017_2	4.039	4.919	0.821102	2.872	71	R3
017_3	4.645	5.591	0.830799	2.695	72	R3
018_1	3.698	5.684	0.650598	3.789	73	R3
018_2	4.398	5.773	0.761822	3.275	74	R3
018_3	4.487	5.234	0.857279	3.734	75	R3
018_4	5.547	5.736	0.96705	3.304	76	R3
019_1	5.378	4.821	1.11554	2.437	77	R3
019_2	6.073	4.57	1.32888	2.961	78	R3
019_3	6.073	4.57	1.32888	3.302	79	R3
019_4	4.965	4.846	1.02456	2.713	80	R3
019_5	4.965	4.846	1.02456	3.251	81	R3
020_1	4.509	4.745	0.950263	2.803	82	R3
020_2	4.509	4.745	0.950263	3.04	83	R3
020_3	5.278	4.536	1.16358	3.541	84	R3
020_4	5.278	4.536	1.16358	3.646	85	R3
020_5	5.203	4.774	1.08986	2.585	86	R3
020_6	4.662	4.891	0.953179	2.475	87	R3
020_7	4.662	4.891	0.953179	4.225	88	R3
021_1	4.82	5.421	0.889135	3.564	89	R3
021_2	4.82	5.421	0.889135	3.644	90	R3
021_3	4.335	5.861	0.739635	3.002	91	R3
021_4	3.895	6.734	0.578408	2.981	92	R3
021_5	3.895	6.734	0.578408	3.622	93	R3
021_6	4.991	6.203	0.804611	2.885	94	R3
021_7	4.991	6.203	0.804611	5.946	95	R3
022_1	6.438	5.271	1.2214	2.879	96	R3
022_2	5.64	5.458	1.03335	3.172	97	R3
022_3	5.64	5.458	1.03335	4.479	98	R3
022_4	5.811	5.54	1.04892	3.971	99	R3
022_5	5.811	5.54	1.04892	3.579	100	R3
001_1	6.165	4.99	1.23547	3.166	101	R4
001_2	4.404	5.776	0.762465	3.262	102	R4
001_3	4.404	5.776	0.762465	3.203	103	R4
001_4	5.276	5.336	0.988756	2.525	104	R4
001_5	5.276	5.336	0.988756	3.577	105	R4
001_6	5.909	5.237	1.12832	2.964	106	R4
001_7	6.193	4.842	1.27902	2.841	107	R4
001_8	6.193	4.842	1.27902	4.372	108	R4
001_9	5.729	5.817	0.984872	2.641	109	R4
001_10	5.729	5.817	0.984872	3.629	110	R4
003_1	5.254	5.276	0.99583	3.461	111	R4
003_2	5.254	5.276	0.99583	3.556	112	R4
003_3	5.877	5.186	1.13324	3.271	113	R4
003_4	4.841	6.433	0.752526	3.991	114	R4
003_5	4.841	6.433	0.752526	3.844	115	R4
006_1	6.178	4.983	1.23982	2.841	116	R4
006_2	5.209	4.848	1.07446	3.712	117	R4
006_3	3.656	5.745	0.636379	3.898	118	R4
006_4	4.976	5.006	0.994007	3.146	119	R4
006_5	4.976	5.006	0.994007	3.435	120	R4
007_1	5.324	5.099	1.04413	4.825	121	R4
007_2	5.399	4.984	1.08327	3.425	122	R4
007_3	5.399	4.984	1.08327	3.107	123	R4
007_4	4.273	5.282	0.808974	3.183	124	R4
007_5	4.961	4.87	1.01869	3.728	125	R4
007_6	4.901	5.156	0.950543	3.853	126	R4
007_7	4.901	5.156	0.950543	3.096	127	R4
009_1	4.663	4.961	0.939931	4.221	128	R4
009_2	4.923	5.72	0.860664	3.713	129	R4
009_3	3.923	5.727	0.685001	2.86	130	R4
010_1	4.721	5.803	0.813545	2.867	131	R4
010_2	6.149	5.683	1.082	3.134	132	R4
010_3	6.149	5.683	1.082	3.69	133	R4
010_4	5.532	5.336	1.03673	2.248	134	R4
010_5	5.532	5.336	1.03673	2.662	135	R4
010_6	5.569	5.592	0.995887	2.603	136	R4
010_7	5.569	5.592	0.995887	3.015	137	R4
012_1	5.115	5.101	1.00274	3.384	138	R4
012_2	4.705	5.757	0.817266	2.981	139	R4
012_3	4.639	5.455	0.850412	4.233	140	R4
012_4	3.97	5.713	0.694906	3.393	141	R4
012_5	5.165	5.614	0.920021	3.172	142	R4
012_6	5.479	5.345	1.02507	3.047	143	R4
013_1	5.795	6.02	0.962625	3.046	144	R4
013_2	5.389	5.795	0.92994	3.338	145	R4
013_3	3.955	5.922	0.667849	4.136	146	R4
013_4	4.938	5.438	0.908054	4.42	147	R4
014_1	4.483	5.796	0.773464	3.118	148	R4
014_2	4.483	5.796	0.773464	3.046	149	R4
014_3	3.892	6.149	0.632948	4.064	150	R4
014_4	4.962	5.367	0.924539	3.55	151	R4
014_5	4.944	5.381	0.918788	3.196	152	R4
014_6	4.944	5.381	0.918788	4.197	153	R4
015_1	6.491	4.899	1.32496	2.539	154	R4
015_2	5.745	4.301	1.33574	3.207	155	R4
015_3	5.697	5.115	1.11378	2.553	156	R4
015_4	5.697	5.115	1.11378	3.342	157	R4
015_5	6.403	5.097	1.25623	3.332	158	R4
016_1	5.618	5.486	1.02406	3.83	159	R4
016_2	6.53	5.135	1.27167	3.014	160	R4
016_3	5.079	5.353	0.948814	3.833	161	R4
016_4	5.079	5.353	0.948814	3.104	162	R4
016_5	5.549	5.526	1.00416	2.497	163	R4
016_6	4.741	5.722	0.828556	3.683	164	R4
016_7	4.741	5.722	0.828556	4.149	165	R4
016_8	5.915	5.215	1.13423	3.496	166	R4
017_1	5.216	6.328	0.824273	5.131	167	R4
017_2	5.216	6.328	0.824273	3.877	168	R4
017_3	4.435	6.209	0.714286	5.569	169	R4
017_4	4.435	6.209	0.714286	3.609	170	R4
017_5	5.298	6.378	0.830668	3.069	171	R4
017_6	5.298	6.378	0.830668	3.873	172	R4
018_1	5.026	5.82	0.863574	2.864	173	R4
018_2	5.039	5.503	0.915682	4.548	174	R4
018_3	5.039	5.503	0.915682	3.738	175	R4
018_4	4.6	6.12	0.751634	4.348	176	R4
018_5	4.6	6.12	0.751634	3.296	177	R4
018_6	5.006	5.592	0.895207	3.279	178	R4
018_7	5.435	6.066	0.895978	2.73	179	R4
019_1	6.022	5.077	1.18613	3.427	180	R4
019_2	6.022	5.077	1.18613	3.087	181	R4
019_3	4.343	5.787	0.750475	3.564	182	R4
019_4	4.343	5.787	0.750475	3.534	183	R4
019_5	4.239	5.519	0.768074	3.371	184	R4
019_6	4.239	5.519	0.768074	2.593	185	R4
020_1	4.972	5	0.9944	3.105	186	R4
020_2	4.972	5	0.9944	3.886	187	R4
020_3	4.647	5.281	0.879947	3.518	188	R4
020_4	4.539	4.99	0.909619	3.095	189	R4
020_5	5.442	5.261	1.0344	3.033	190	R4
022_1	5.772	4.872	1.18473	3.605	191	R4
022_2	5.772	4.872	1.18473	2.932	192	R4
022_3	6.226	4.735	1.31489	2.302	193	R4
022_4	6.226	4.735	1.31489	5.508	194	R4
022_5	5.031	5.392	0.933049	2.892	195	R4
022_6	5.031	5.392	0.933049	3.491	196	R4
024_1	5.097	6.094	0.836396	3.425	197	R4
024_2	5.097	6.094	0.836396	3.636	198	R4
024_3	5.909	6.427	0.919403	4.099	199	R4
024_4	4.42	6.469	0.683259	3.097	200	R4
024_5	4.361	6.376	0.683971	3.399	201	R4
024_6	4.361	6.376	0.683971	3.61	202	R4
024_7	5.366	5.886	0.911655	2.934	203	R4
025_1	5.977	5.842	1.02311	4.016	204	R4
025_2	5.977	5.842	1.02311	3.366	205	R4
026_1	5.909	5.164	1.14427	2.582	206	R4
026_2	5.909	5.164	1.14427	3.443	207	R4
026_3	4.649	5.801	0.801414	2.345	208	R4
026_4	4.649	5.801	0.801414	2.736	209	R4
026_5	5.617	4.578	1.22696	3.023	210	R4
026_6	4.9	4.376	1.11974	2.925	211	R4
027_1	4.891	5.83	0.838937	2.459	212	R4
027_2	4.891	5.83	0.838937	3.383	213	R4
028_1	6.116	5.443	1.12365	4.864	214	R4
028_2	6.116	5.443	1.12365	3.157	215	R4
028_3	5.306	5.879	0.902534	4.089	216	R4
028_4	5.306	5.879	0.902534	2.823	217	R4
030_1	5.656	5.577	1.01417	2.51	218	R4
030_2	4.668	5.817	0.802476	3.328	219	R4
030_3	4.668	5.817	0.802476	3.599	220	R4
030_4	4.374	5.757	0.759771	2.363	221	R4
030_5	4.374	5.757	0.759771	3.127	222	R4
030_6	4.691	4.901	0.957152	3.958	223	R4
031_1	5.001	6.006	0.832667	4.29	224	R4
031_2	5.344	6.833	0.782087	5.213	225	R4
031_3	5.935	6.365	0.932443	3.83	226	R4
031_4	5.935	6.365	0.932443	3.828	227	R4
031_5	6.773	6.03	1.12322	5.352	228	R4
031_6	6.773	6.03	1.12322	3.672	229	R4
032_1	5.523	5.236	1.05481	3.613	230	R4
032_2	5.757	6.379	0.902493	3.17	231	R4
032_3	5.757	6.379	0.902493	4.794	232	R4
032_4	5.319	7.48	0.711096	2.872	233	R4
032_5	5.319	7.48	0.711096	2.917	234	R4
032_6	5.204	6.243	0.833574	3.477	235	R4
032_7	5.204	6.243	0.833574	4.198	236	R4
033_1	5.696	5.638	1.01029	3.282	237	R4
033_2	5.96	5.596	1.06505	2.968	238	R4
033_3	5.96	5.596	1.06505	3.779	239	R4
033_4	4.736	6.005	0.788676	3.271	240	R4
033_5	4.736	6.005	0.788676	3.817	241	R4
033_6	3.974	6.497	0.611667	2.755	242	R4
033_7	3.974	6.497	0.611667	3.529	243	R4
033_8	5.247	5.369	0.977277	5.293	244	R4
033_9	5.247	5.369	0.977277	3.677	245	R4
034_1	6.039	5.635	1.07169	3.3	246	R4
035_1	5.111	5.547	0.921399	2.727	247	R4
035_2	4.807	5.843	0.822694	3.361	248	R4
035_3	6.321	5.29	1.1949	3.171	249	R4
035_4	5.326	5.525	0.963982	3.095	250	R4
036_1	6.065	5.93	1.02277	2.861	251	R4
036_2	5.212	5.788	0.900484	3.289	252	R4
036_3	5.872	6.547	0.896899	2.752	253	R4
036_4	5.872	6.547	0.896899	2.995	254	R4
036_5	5.75	5.412	1.06245	3.345	255	R4
036_6	5.75	5.412	1.06245	2.762	256	R4
036_7	5.663	5.255	1.07764	3.362	257	R4
036_8	5.663	5.255	1.07764	3.278	258	R4
037_1	6.08	5.11	1.18982	3.055	259	R4
037_2	5.368	5.668	0.947071	6.116	260	R4
037_3	5.434	5.998	0.905969	3.277	261	R4
037_4	5.434	5.998	0.905969	3.811	262	R4
037_5	4.826	5.592	0.863019	3.622	263	R4
037_6	4.826	5.592	0.863019	3.976	264	R4
037_7	5.491	6.04	0.909106	3.913	265	R4
037_8	5.491	6.04	0.909106	3.331	266	R4
037_9	4.54	6.347	0.715299	3.549	267	R4
037_10	4.54	6.347	0.715299	3.852	268	R4
038_1	5.891	6.746	0.873258	3.09	269	R4
038_2	4.421	6.825	0.647766	3.54	270	R4
038_3	4.421	6.825	0.647766	3.17	271	R4
038_4	5.759	5.82	0.989519	3.296	272	R4
038_5	5.759	5.82	0.989519	4.437	273	R4
038_6	6.165	5.835	1.05656	3.344	274	R4
038_7	6.165	5.835	1.05656	2.806	275	R4
038_8	4.098	6.3	0.650476	3.374	276	R4
038_9	5.188	5.982	0.867268	3.342	277	R4
039_1	5.937	4.735	1.25385	2.71	278	R4
039_2	4.284	5.166	0.829268	3.722	279	R4
039_3	4.284	5.166	0.829268	2.836	280	R4
039_4	4.645	5.389	0.861941	3.183	281	R4
039_5	4.645	5.389	0.861941	4.775	282	R4
039_6	6.562	5.052	1.29889	3.156	283	R4
039_7	6.562	5.052	1.29889	3.085	284	R4
039_8	4.595	5.835	0.787489	3.591	285	R4
039_9	4.595	5.835	0.787489	4.596	286	R4
040_1	5.141	5.141	1	3.055	287	R4
040_2	5.067	5.831	0.868976	3.159	288	R4
040_3	5.809	5.458	1.06431	3.715	289	R4
040_4	5.809	5.458	1.06431	2.893	290	R4
040_5	5.206	4.285	1.21494	3	291	R4
040_6	5.206	4.285	1.21494	2.916	292	R4
041_1	5.704	5.074	1.12416	3.432	293	R4
041_2	4.435	5.744	0.77211	3.631	294	R4
041_3	4.376	5.863	0.746376	2.592	295	R4
042_1	4.833	5.401	0.894834	3.025	296	R4
042_2	4.436	5.805	0.764169	3.497	297	R4
042_3	4.436	5.805	0.764169	4.625	298	R4
042_4	4.081	5.592	0.729793	3.844	299	R4
042_5	4.081	5.592	0.729793	2.928	300	R4
043_1	6.36	4.808	1.3228	3.555	301	R4
043_2	5.547	5.233	1.06	3.202	302	R4
043_3	5.547	5.233	1.06	2.777	303	R4
043_4	5.12	5.939	0.862098	3.82	304	R4
043_5	5.504	5.532	0.994939	3.635	305	R4
043_6	4.475	5.497	0.81408	2.728	306	R4
043_7	5.575	4.563	1.22178	3.705	307	R4
044_1	4.02	5.557	0.723412	2.693	308	R4
044_2	4.02	5.557	0.723412	4.479	309	R4
044_3	4.662	5.386	0.865577	3.547	310	R4
044_4	4.662	5.386	0.865577	3.537	311	R4
044_5	5.036	5.037	0.999801	3.394	312	R4
044_6	5.036	5.037	0.999801	3.194	313	R4
044_7	4.619	5.66	0.816078	3.622	314	R4
044_8	4.619	5.66	0.816078	2.803	315	R4
046_1	5.413	5.835	0.927678	2.828	316	R4
046_2	5.413	5.835	0.927678	3.282	317	R4
046_3	4.491	5.148	0.872378	3.693	318	R4
046_4	4.491	5.148	0.872378	3.63	319	R4
046_5	4.578	5.48	0.835401	3.294	320	R4
046_6	4.578	5.48	0.835401	4.015	321	R4
046_7	3.991	5.141	0.776308	4.104	322	R4
046_8	3.991	5.141	0.776308	4.135	323	R4
01_1	5.904	5.882	1.00374	3.128	324	R5
01_2	5.904	5.882	1.00374	3.05	325	R5
01_3	5.634	6.491	0.867971	4.226	326	R5
01_4	5.634	6.491	0.867971	3.413	327	R5
02_1	5.955	6.226	0.956473	2.799	328	R5
02_2	5.955	6.226	0.956473	2.256	329	R5
02_3	4.618	6.197	0.745199	2.389	330	R5
02_4	4.618	6.197	0.745199	3.734	331	R5
02_5	5.912	5.528	1.06946	2.714	332	R5
03_1	5.377	5.243	1.02556	2.883	333	R5
03_2	4.695	5.474	0.857691	3.295	334	R5
03_3	4.695	5.474	0.857691	5.132	335	R5
03_4	5.129	5.925	0.865654	2.341	336	R5
03_5	5.129	5.925	0.865654	2.757	337	R5
03_6	4.364	5.399	0.808298	3.643	338	R5
03_7	4.364	5.399	0.808298	3.018	339	R5
03_8	5.129	6.119	0.838209	2.895	340	R5
03_9	5.129	6.119	0.838209	2.807	341	R5
03_10	3.945	5.204	0.758071	3.154	342	R5
03_11	3.945	5.204	0.758071	4.021	343	R5
04_1	5.825	5.012	1.16221	2.396	344	R5
04_2	5.176	5.838	0.886605	3.327	345	R5
04_3	5.176	5.838	0.886605	3.346	346	R5
04_4	5.281	5.086	1.03834	3.5	347	R5
04_5	5.147	5.478	0.939576	2.769	348	R5
04_6	5.147	5.478	0.939576	3.46	349	R5
04_7	5.078	6.411	0.792076	2.642	350	R5
04_8	5.078	6.411	0.792076	2.886	351	R5
04_9	5.342	5.463	0.977851	2.777	352	R5
04_10	5.342	5.463	0.977851	2.577	353	R5
04_11	5.442	5.056	1.07634	2.902	354	R5
04_12	4.8	5.221	0.919364	3.519	355	R5
05_1	6.298	4.31	1.46125	2.652	356	R5
05_2	5.692	5.134	1.10869	2.93	357	R5
05_3	5.692	5.134	1.10869	2.531	358	R5
05_4	5.558	5.076	1.09496	3.301	359	R5
05_5	5.558	5.076	1.09496	3.401	360	R5
05_6	5.483	5.077	1.07997	2.417	361	R5
05_7	5.483	5.077	1.07997	3.528	362	R5
05_8	6.301	5.309	1.18685	2.996	363	R5
05_9	5.438	4.821	1.12798	3.246	364	R5
05_10	5.438	4.821	1.12798	3.634	365	R5
05_11	5.24	4.984	1.05136	3.505	366	R5
05_12	4.505	5.423	0.830721	3.282	367	R5
06_1	5.123	4.866	1.05282	2.988	368	R5
06_2	5.429	5.181	1.04787	2.441	369	R5
07_1	5.926	4.16	1.42452	2.623	370	R5
07_2	5.109	5.103	1.00118	2.769	371	R5
07_3	5.109	5.103	1.00118	2.319	372	R5
07_4	4.592	4.954	0.926928	2.576	373	R5
07_5	4.743	5.308	0.893557	2.688	374	R5
07_6	5.877	4.451	1.32038	2.97	375	R5
07_7	5.877	4.451	1.32038	2.839	376	R5
08_1	6.03	4.277	1.40987	2.41	377	R5
09_1	5.695	4.685	1.21558	2.718	378	R5
09_2	5.257	5.067	1.0375	3.639	379	R5
09_3	5.257	5.067	1.0375	2.954	380	R5
09_4	5.802	4.683	1.23895	2.58	381	R5
09_5	5.802	4.683	1.23895	2.35	382	R5
09_6	4.877	5.263	0.926658	3.937	383	R5
09_7	4.877	5.263	0.926658	3.074	384	R5
09_8	6.27	4.717	1.32923	3.052	385	R5
12_1	6.07	5.686	1.06753	3.119	386	R5
12_2	4.694	5.777	0.812532	2.348	387	R5
12_3	4.694	5.777	0.812532	2.666	388	R5
12_4	5.297	5.731	0.924272	2.557	389	R5
13_1	6.103	6.217	0.981663	3.818	390	R5
13_2	6.248	5.962	1.04797	3.579	391	R5
13_3	7.54	5.638	1.33735	2.553	392	R5
13_4	6.17	5.741	1.07473	3.288	393	R5
14_1	5.359	5.453	0.982762	3.021	394	R5
14_2	5.391	5.842	0.9228	3.725	395	R5
14_3	5.391	5.842	0.9228	4.231	396	R5
14_4	5.91	5.3	1.11509	2.363	397	R5
14_5	5.91	5.3	1.11509	3.05	398	R5
15_1	6.012	5.022	1.19713	2.287	399	R5
15_2	5.329	6.411	0.831228	2.855	400	R5
16_1	6.792	5.841	1.16281	2.602	401	R5
16_2	6.216	5.45	1.14055	3.752	402	R5
17_1	4.737	6.07	0.780395	3.856	403	R5
17_2	4.956	6.332	0.782691	2.563	404	R5
17_3	4.956	6.332	0.782691	3.419	405	R5
17_4	5.931	5.773	1.02737	2.79	406	R5
17_5	5.931	5.773	1.02737	2.957	407	R5
17_6	5.66	6.201	0.912756	2.324	408	R5
17_7	5.66	6.201	0.912756	3.37	409	R5
17_8	3.848	6.393	0.601908	2.424	410	R5
17_9	4.269	6.66	0.640991	2.273	411	R5
17_10	4.983	6.383	0.780667	2.408	412	R5
17_11	4.983	6.383	0.780667	3.068	413	R5
17_12	6.765	6.405	1.05621	2.909	414	R5
18_1	5.955	5.97	0.997487	2.661	415	R5
18_2	5.955	5.97	0.997487	2.216	416	R5
18_3	6.167	5.565	1.10818	3.472	417	R5
19_1	6.246	6.292	0.992689	2.889	418	R5
19_2	6.742	6.02	1.11993	2.459	419	R5
19_3	5.848	5.652	1.03468	3.132	420	R5
19_4	5.622	5.592	1.00536	3.183	421	R5
19_5	5.622	5.592	1.00536	2.796	422	R5
19_6	5.389	5.682	0.948434	2.91	423	R5
20_1	5.299	5.659	0.936385	3.215	424	R5
20_2	6.554	5.674	1.15509	2.635	425	R5
20_3	6.125	6.034	1.01508	3.048	426	R5
20_4	6.622	5.788	1.14409	3.38	427	R5
21_1	6.228	5.613	1.10957	2.289	428	R5
21_2	6.033	5.057	1.193	3.377	429	R5
21_3	4.435	6.551	0.676996	3.636	430	R5
21_4	4.435	6.551	0.676996	2.906	431	R5
21_5	6.218	5.176	1.20131	2.985	432	R5
21_6	5.357	4.902	1.09282	3	433	R5
21_7	5.357	4.902	1.09282	2.57	434	R5
21_8	5.808	6.117	0.949485	3.688	435	R5
21_9	5.03	6.581	0.764322	2.861	436	R5
24_1	4.759	5.501	0.865115	3.471	437	R5
24_2	4.759	5.501	0.865115	3.319	438	R5
24_3	5.378	6.104	0.881062	3.025	439	R5
24_4	4.997	5.44	0.918566	3.983	440	R5
24_5	4.997	5.44	0.918566	3.635	441	R5
24_6	5.866	5.221	1.12354	3.517	442	R5
24_7	5.866	5.221	1.12354	2.985	443	R5
24_8	4.49	5.528	0.812229	2.763	444	R5
24_9	4.49	5.528	0.812229	2.983	445	R5
24_10	5.074	4.932	1.02879	2.815	446	R5
24_11	5.439	5.748	0.946242	3.015	447	R5
24_12	5.439	5.748	0.946242	3.474	448	R5
25_1	5.007	4.916	1.01851	2.689	449	R5
25_2	5.943	4.756	1.24958	2.728	450	R5
25_3	5.414	5.579	0.970425	2.504	451	R5
25_4	5.406	5.391	1.00278	2.862	452	R5
25_5	5.166	5.634	0.916933	2.464	453	R5
25_6	5.166	5.634	0.916933	2.678	454	R5
25_7	5.065	5.485	0.923428	3.077	455	R5
26_1	5.033	5.887	0.854935	3.713	456	R5
26_2	4.826	5.253	0.918713	3.677	457	R5
26_3	4.061	6.571	0.618019	3.872	458	R5
26_4	4.061	6.571	0.618019	4.176	459	R5
26_5	3.948	6.398	0.617068	3.6	460	R5
26_6	4.031	6.016	0.670047	4.07	461	R5
27_1	6.438	5.065	1.27108	3.105	462	R5
27_2	6.464	5.158	1.2532	3.554	463	R5
27_3	6.147	5.292	1.16156	3.27	464	R5
27_4	5.209	5.663	0.91983	3.116	465	R5
28_1	5.498	5.799	0.948094	3.446	466	R5
28_2	5.498	5.799	0.948094	3.415	467	R5
28_3	5.561	5.197	1.07004	3.072	468	R5
28_4	4.625	5.875	0.787234	3.2	469	R5
28_5	4.625	5.875	0.787234	2.652	470	R5
28_6	5.263	5.93	0.887521	3.713	471	R5
28_7	5.263	5.93	0.887521	4.305	472	R5
28_8	6.17	4.701	1.31249	3.23	473	R5
29_1	5.751	5.548	1.03659	3.274	474	R5
29_2	5.751	5.548	1.03659	2.569	475	R5
30_1	4.022	5.565	0.722731	2.943	476	R5
31_1	5.023	5.743	0.87463	3.521	477	R5
31_2	5.023	5.743	0.87463	3.01	478	R5
31_3	4.286	5.559	0.771002	4.269	479	R5
31_4	4.286	5.559	0.771002	2.559	480	R5
31_5	4.565	5.045	0.904856	4.342	481	R5
31_6	4.565	5.045	0.904856	3.443	482	R5
31_7	4.955	5.526	0.89667	2.834	483	R5
31_8	4.955	5.526	0.89667	3.404	484	R5
31_9	4.582	5.589	0.819825	3.307	485	R5
31_10	4.582	5.589	0.819825	3.824	486	R5
31_11	5.141	6.179	0.832012	2.945	487	R5
31_12	5.141	6.179	0.832012	2.824	488	R5
32_1	5.707	4.58	1.24607	3.08	489	R5
32_2	5.707	4.58	1.24607	2.845	490	R5
32_3	5.57	4.711	1.18234	3.605	491	R5
34_1	5.651	5.377	1.05096	2.643	492	R5
35_1	5.089	5.782	0.880145	2.954	493	R5
35_2	5.807	6.1	0.951967	3.397	494	R5
35_3	5.58	6.097	0.915204	3.501	495	R5
35_4	5.017	5.804	0.864404	3.897	496	R5
36_1	5.79	5.581	1.03745	2.996	497	R5
36_2	5.462	5.911	0.92404	3.347	498	R5
36_3	5.7	5.315	1.07244	3.195	499	R5
37_1	5.114	6.578	0.77744	4.225	500	R5
37_2	6.307	6.33	0.996367	5.083	501	R5
37_3	4.821	6.195	0.778208	5.143	502	R5
37_4	4.821	6.195	0.778208	5.218	503	R5
37_5	5.114	6.556	0.780049	3.876	504	R5
37_6	5.114	6.556	0.780049	4.356	505	R5
37_7	5.094	6.27	0.81244	3.117	506	R5
37_8	5.094	6.27	0.81244	3.9	507	R5
38_1	5.973	5.95	1.00387	3.29	508	R5
38_2	5.973	5.95	1.00387	3.046	509	R5
38_3	7.278	5.506	1.32183	2.656	510	R5
38_4	5.781	5.785	0.999309	3.349	511	R5
38_5	5.781	5.785	0.999309	3.697	512	R5
38_6	5.117	5.694	0.898665	4.695	513	R5
38_7	5.117	5.694	0.898665	3.27	514	R5
38_8	6.067	5.95	1.01966	3.066	515	R5
38_9	6.067	5.95	1.01966	4.964	516	R5
01_1	4.256	5.063	0.840608	2.535	517	R6
01_2	3.299	5.942	0.5552	3.184	518	R6
01_3	3.299	5.942	0.5552	3.186	519	R6
01_4	3.254	6.259	0.519891	3.395	520	R6
01_5	3.254	6.259	0.519891	2.671	521	R6
02_1	4.143	6.033	0.686723	2.713	522	R6
02_2	4.143	6.033	0.686723	2.737	523	R6
02_3	4.785	6.124	0.781352	3.375	524	R6
02_4	4.785	6.124	0.781352	3.34	525	R6
02_5	4.639	5.24	0.885305	3.177	526	R6
02_6	4.639	5.24	0.885305	4.935	527	R6
02_7	4.86	5.356	0.907394	3.793	528	R6
02_8	4.574	6.23	0.734189	3.594	529	R6
03_1	4.177	5.739	0.727827	3.14	530	R6
03_2	4.192	5.844	0.717317	3.217	531	R6
03_3	4.192	5.844	0.717317	3.047	532	R6
03_4	3.982	5.503	0.723605	3.521	533	R6
03_5	3.982	5.503	0.723605	3.717	534	R6
04_1	4.612	6.143	0.750773	2.593	535	R6
04_2	4.612	6.143	0.750773	2.559	536	R6
04_3	4.875	5.4	0.902778	3.305	537	R6
04_4	4.875	5.4	0.902778	2.525	538	R6
04_5	3.893	6.322	0.615786	2.992	539	R6
04_6	3.893	6.322	0.615786	2.627	540	R6
04_7	3.795	5.867	0.646838	3.326	541	R6
05_1	4.258	6.258	0.680409	3.705	542	R6
05_2	4.258	6.258	0.680409	3.294	543	R6
05_3	3.322	6.165	0.538848	3.174	544	R6
05_4	3.295	6.944	0.47451	4.197	545	R6
05_5	3.453	6.155	0.561007	4.284	546	R6
05_6	3.61	6.258	0.576862	3.131	547	R6
05_7	3.61	6.258	0.576862	4.392	548	R6
05_8	3.698	6.359	0.581538	3.317	549	R6
06_1	4.331	6.344	0.682692	3.728	550	R6
06_2	4.331	6.344	0.682692	3.311	551	R6
07_1	3.671	6.496	0.565117	3.49	552	R6
07_2	3.631	6.34	0.572713	3.344	553	R6
07_3	3.631	6.34	0.572713	3.148	554	R6
07_4	4.457	6.003	0.742462	3.587	555	R6
07_5	4.457	6.003	0.742462	4.252	556	R6
07_6	4.035	6.299	0.640578	3.736	557	R6
07_7	4.035	6.299	0.640578	3.095	558	R6
08_1	4.37	6.124	0.713586	3.426	559	R6
08_2	4.37	6.124	0.713586	3.499	560	R6
08_3	3.78	6.62	0.570997	4.325	561	R6
08_4	3.78	6.62	0.570997	2.956	562	R6
09_1	4.344	5.185	0.837801	3.504	563	R6
09_2	4.288	5.342	0.802696	2.987	564	R6
09_3	5.642	5.615	1.00481	1.974	565	R6
09_4	5.642	5.615	1.00481	2.918	566	R6
09_5	3.882	5.387	0.720624	3.104	567	R6
09_6	3.882	5.387	0.720624	2.761	568	R6
10_1	5.069	5.456	0.929069	2.14	569	R6
10_2	5.9	4.813	1.22585	2.564	570	R6
10_3	5.382	5.311	1.01337	2.604	571	R6
10_4	5.382	5.311	1.01337	2.975	572	R6
10_5	4.369	5.678	0.769461	3.193	573	R6
10_6	4.369	5.678	0.769461	3.617	574	R6
10_7	4.355	5.47	0.796161	3.213	575	R6
10_8	4.355	5.47	0.796161	2.985	576	R6
10_9	3.556	6.09	0.583908	3.622	577	R6
10_10	4.031	5.467	0.737333	3.688	578	R6
11_1	5.076	5.403	0.939478	2.29	579	R6
11_2	4.665	6.165	0.756691	3.557	580	R6
11_3	4.665	6.165	0.756691	4.263	581	R6
12_1	3.965	5.804	0.68315	3.438	582	R6
12_2	3.965	5.804	0.68315	3.27	583	R6
12_3	5.278	6.22	0.848553	2.73	584	R6
12_4	5.278	6.22	0.848553	3.618	585	R6
12_5	4.642	5.318	0.872885	3.472	586	R6
12_6	3.646	6.3	0.57873	3.24	587	R6
13_1	4.637	5.147	0.900913	3.177	588	R6
13_2	5.312	5.631	0.943349	2.613	589	R6
13_3	5.103	6.033	0.845848	3.232	590	R6
13_4	5.103	6.033	0.845848	3.582	591	R6
14_1	3.925	6.838	0.573998	3.071	592	R6
14_2	3.925	6.838	0.573998	3.686	593	R6
14_3	3.159	6.497	0.486224	4.466	594	R6
14_4	3.159	6.497	0.486224	3.702	595	R6
14_5	3.046	6.662	0.45722	4.63	596	R6
14_6	3.046	6.662	0.45722	3.399	597	R6
14_7	3.685	6.612	0.55732	3.483	598	R6
14_8	3.43	6.999	0.49007	4.086	599	R6
14_9	3.745	5.798	0.645912	5.245	600	R6
14_10	3.745	5.798	0.645912	4.648	601	R6
15_1	4.342	6.718	0.646323	3.661	602	R6
15_2	4.342	6.718	0.646323	3.191	603	R6
15_3	4.16	7.02	0.592593	3.19	604	R6
15_4	4.16	7.02	0.592593	3.139	605	R6
15_5	4.108	6.655	0.61728	3.817	606	R6
16_1	4.84	6.061	0.798548	2.588	607	R6
16_2	4.84	6.061	0.798548	3.026	608	R6
17_1	4.468	6.248	0.715109	3.673	609	R6
17_2	4.468	6.248	0.715109	3.289	610	R6
17_3	4.644	5.638	0.823696	3.039	611	R6
17_4	4.644	5.638	0.823696	2.902	612	R6
17_5	5.285	6.01	0.879368	3.368	613	R6
17_6	5.285	6.01	0.879368	2.843	614	R6
17_7	4.57	6.226	0.734019	2.592	615	R6
17_8	4.57	6.226	0.734019	2.661	616	R6
17_9	4.237	5.749	0.736998	3.734	617	R6
17_10	4.237	5.749	0.736998	3.168	618	R6
17_11	5.332	5.755	0.926499	3.388	619	R6
17_12	5.332	5.755	0.926499	2.996	620	R6
17_13	5.101	5.817	0.876912	2.59	621	R6
17_14	3.501	5.766	0.60718	3.496	622	R6
18_1	4.953	6.232	0.794769	2.756	623	R6
18_2	4.642	4.781	0.970927	3.17	624	R6
18_3	6.28	6.983	0.899327	3.357	625	R6
18_4	6.28	6.983	0.899327	3.069	626	R6
19_1	5.768	4.756	1.21278	3.385	627	R6
19_2	4.478	5.31	0.843315	2.251	628	R6
19_3	4.169	5.815	0.716939	3.471	629	R6
19_4	4.169	5.815	0.716939	2.833	630	R6
19_5	5.477	5.25	1.04324	3.176	631	R6
19_6	5.477	5.25	1.04324	3.439	632	R6
19_7	3.966	5.618	0.705945	3.458	633	R6
20_1	5.143	5.654	0.909622	2.768	634	R6
21_1	4.557	6.024	0.756474	3.299	635	R6
21_2	4.156	5.554	0.74829	3.127	636	R6
21_3	4.292	5.722	0.750087	4.109	637	R6
21_4	3.787	4.936	0.76722	3.546	638	R6
21_5	4.513	4.994	0.903684	2.838	639	R6
21_6	4.513	4.994	0.903684	2.858	640	R6
21_7	3.527	5.19	0.679576	2.62	641	R6
21_8	3.527	5.19	0.679576	3.254	642	R6
21_9	4.142	5.249	0.789103	3.015	643	R6
21_10	4.142	5.249	0.789103	2.772	644	R6
21_11	4.535	5.832	0.777606	2.981	645	R6
21_12	3.745	6.092	0.614741	4.033	646	R6
21_13	3.745	6.092	0.614741	3.235	647	R6
21_14	3.859	5.653	0.682646	3.371	648	R6
21_15	3.642	6.407	0.568441	3.88	649	R6
21_16	3.568	6.318	0.564736	5.194	650	R6
21_17	3.568	6.318	0.564736	3.233	651	R6
22_1	4.728	5.894	0.802172	3.05	652	R6
22_2	4.38	6.119	0.715803	3.095	653	R6
22_3	5.005	6.183	0.809478	3.355	654	R6
22_4	4.063	5.493	0.739669	3.163	655	R6
22_5	4.548	5.047	0.901129	3.23	656	R6
22_6	4.139	5.464	0.757504	3.062	657	R6
22_7	4.23	5.721	0.739381	4.053	658	R6
22_8	4.772	6.004	0.794803	3.223	659	R6
22_9	4.772	6.004	0.794803	4.074	660	R6
22_10	4.289	5.96	0.719631	3.672	661	R6
22_11	4.289	5.96	0.719631	5.494	662	R6
23_1	5.302	5.478	0.967871	3.149	663	R6
23_2	5.435	5.114	1.06277	2.832	664	R6
23_3	4.606	5.636	0.817246	2.966	665	R6
23_4	4.606	5.636	0.817246	3.023	666	R6
23_5	4.968	6.798	0.730803	3.804	667	R6
23_6	4.968	6.798	0.730803	3.168	668	R6
23_7	5.105	5.427	0.940667	3.298	669	R6
23_8	5.105	5.427	0.940667	3.024	670	R6
23_9	3.707	6.451	0.57464	3.159	671	R6
23_10	3.707	6.451	0.57464	3.326	672	R6
23_11	3.993	5.638	0.70823	3.864	673	R6
23_12	3.991	6.268	0.636726	3.288	674	R6
24_1	3.982	5.511	0.722555	2.037	675	R6
24_2	5.603	5.039	1.11193	3.08	676	R6
24_3	5.603	5.039	1.11193	2.422	677	R6
25_1	4.837	6.081	0.795428	3.278	678	R6
25_2	4.837	6.081	0.795428	4.114	679	R6
25_3	4.833	5.964	0.810362	3.221	680	R6
25_4	4.833	5.964	0.810362	4.801	681	R6
25_5	3.369	6.442	0.522974	3.529	682	R6
25_6	3.369	6.442	0.522974	3.665	683	R6
001_1	4.797	4.978	0.96364	2.439	684	R6
001_2	5.48	5.69	0.963093	2.502	685	R6
002_1	4.986	4.939	1.00952	2.787	686	R6
002_2	4.986	4.939	1.00952	2.981	687	R6
002_3	4.429	5.614	0.788921	2.539	688	R6
002_4	4.987	5.438	0.917065	2.595	689	R6
002_5	4.963	5.537	0.896334	2.587	690	R6
003_1	4.937	5.119	0.964446	3.274	691	R6
003_2	4.498	5.569	0.807685	3.634	692	R6
003_3	4.498	5.569	0.807685	3.239	693	R6
004_1	5.977	4.957	1.20577	3.875	694	R6
005_1	4.826	5.734	0.841646	3.582	695	R6
005_2	4.398	5.792	0.759323	2.672	696	R6
005_3	4.413	5.701	0.774075	3.544	697	R6
005_4	4.255	4.975	0.855276	3.42	698	R6
005_5	3.874	5.945	0.65164	3.465	699	R6
005_6	4.112	5.853	0.702546	3.042	700	R6
005_7	3.444	6.218	0.553876	3.383	701	R6
005_8	3.444	6.218	0.553876	4.016	702	R6
005_9	4.562	5.622	0.811455	3.031	703	R6
005_10	4.562	5.622	0.811455	3.061	704	R6
006_1	4.528	5.413	0.836505	3.595	705	R6
006_2	4.528	5.413	0.836505	3.408	706	R6
006_3	5.413	5.458	0.991755	2.955	707	R6
006_4	4.971	5.455	0.911274	2.88	708	R6
007_1	4.893	5.609	0.872348	2.801	709	R6
007_2	4.48	5.755	0.778454	3.052	710	R6
007_3	4.48	5.755	0.778454	2.943	711	R6
007_4	3.751	6.063	0.618671	4.14	712	R6
007_5	3.751	6.063	0.618671	3.629	713	R6
007_6	3.368	6.757	0.498446	3.466	714	R6
008_1	5.534	5.384	1.02786	2.973	715	R6
008_2	5.279	4.963	1.06367	2.616	716	R6
008_3	3.862	5.709	0.676476	3.754	717	R6
008_4	5.128	5.595	0.916533	2.67	718	R6
008_5	5.128	5.595	0.916533	4	719	R6
008_6	4.3	5.798	0.741635	3.597	720	R6
008_7	4.3	5.798	0.741635	2.407	721	R6
008_8	4.226	5.603	0.754239	2.894	722	R6
008_9	3.676	6.223	0.590712	2.762	723	R6
009_1	4.887	5.463	0.894563	2.413	724	R6
009_2	5.726	5.239	1.09296	2.373	725	R6
009_3	4.681	5.79	0.808463	3.314	726	R6
010_1	4.626	6.409	0.721797	3.05	727	R6
010_2	5.233	5.74	0.911672	2.546	728	R6
010_3	5.233	5.74	0.911672	2.759	729	R6
010_4	5.1	5.687	0.896782	2.754	730	R6
010_5	4.348	5.813	0.747979	2.786	731	R6
011_1	5.231	4.938	1.05934	2.376	732	R6
011_2	4.798	5.026	0.954636	3.326	733	R6
011_3	5.096	5.614	0.907731	2.825	734	R6
011_4	4.466	5.637	0.792265	1.911	735	R6
011_5	4.466	5.637	0.792265	4.009	736	R6

## Sheet: B_nuclei
Quantification of the SMC nuclei diameter in WT, bdpolar-1, bdpan1-1 and bdpolar-1;bdpan1-1.
genotypes	diameter (µm)
WT	5.576
WT	4.96
WT	4.795
WT	6.268
WT	5.171
WT	5.577
WT	5.124
WT	4.51
WT	5.157
WT	5.036
WT	5.02
WT	5.096
WT	5.138
WT	5.731
WT	4.991
WT	5.225
WT	5.469
WT	5.171
WT	4.692
WT	5.772
bdpolar-1	4.541
bdpolar-1	5.652
bdpolar-1	5.021
bdpolar-1	4.792
bdpolar-1	4.86
bdpolar-1	5.327
bdpolar-1	5.336
bdpolar-1	6.164
bdpolar-1	6.043
bdpolar-1	5.501
bdpolar-1	5.502
bdpolar-1	5.532
bdpolar-1	4.867
bdpolar-1	5.652
bdpolar-1	5.051
bdpolar-1	5.111
bdpolar-1	4.686
bdpolar-1	5.201
bdpolar-1	4.589
bdpolar-1	5.111
bdpan1-1	6.013
bdpan1-1	5.371
bdpan1-1	5.006
bdpan1-1	6.224
bdpan1-1	4.77
bdpan1-1	4.458
bdpan1-1	6.024
bdpan1-1	5.953
bdpan1-1	5.75
bdpan1-1	5.863
bdpan1-1	5.788
bdpan1-1	5.032
bdpan1-1	5.828
bdpan1-1	5.156
bdpan1-1	5.637
bdpan1-1	4.963
bdpan1-1	4.51
bdpan1-1	5.517
bdpan1-1	4.935
bdpan1-1	5.351
bdpolar-1;bdpan1-1	6.094
bdpolar-1;bdpan1-1	6.089
bdpolar-1;bdpan1-1	5.141
bdpolar-1;bdpan1-1	4.814
bdpolar-1;bdpan1-1	5.136
bdpolar-1;bdpan1-1	5.393
bdpolar-1;bdpan1-1	5.186
bdpolar-1;bdpan1-1	5.306
bdpolar-1;bdpan1-1	4.555
bdpolar-1;bdpan1-1	4.754
bdpolar-1;bdpan1-1	4.42
bdpolar-1;bdpan1-1	5.028
bdpolar-1;bdpan1-1	5.321
bdpolar-1;bdpan1-1	5.396
bdpolar-1;bdpan1-1	4.566
bdpolar-1;bdpan1-1	5.006
bdpolar-1;bdpan1-1	4.945
bdpolar-1;bdpan1-1	4.627
bdpolar-1;bdpan1-1	5.808
bdpolar-1;bdpan1-1	5.448

## Sheet: D_simultaneous_SC defects
Quantifications of defective SCs of simultaneously grown BdTAN1 reporter lines in bdpolar-1, bdpan1-1 and WT background.
Genotypes	defective SCs	SCs	individual
TAN1 in WT	5	116	RS176_1
TAN1 in WT	5	144	RS176_2
TAN1 in pan1	54	110	RS177-1
TAN1 in pan1	64	124	RS177-2
TAN1 in pan1	37	136	RS177-3
TAN1 in polar	44	112	RS178_1
TAN1 in polar	46	112	RS178_2
TAN1 in polar	52	104	RS179_1
TAN1 in polar	22	111	RS179_2
TAN1 in polar	35	111	RS179_3
TAN1 in polar	41	128	RS179_4
TAN1 in WT	6	86	RS180_1
TAN1 in WT	7	120	RS180_2
TAN1 in pan1	51	110	RS181_1
TAN1 in pan1	54	154	RS181_2
TAN1 in pan1	35	102	RS181_3
TAN1 in pan1	58	152	RS181_4
TAN1 in pan1	50	124	RS181_5
TAN1 in polar	71	140	RS182_1
TAN1 in polar	59	137	RS182_2
TAN1 in polar	73	120	RS182_3
TAN1 in WT	4	92	RS183_1
TAN1 in WT	3	118	RS183_2
TAN1 in WT	8	100	RS183_3
TAN1 in pan1	51	84	RS184_1
TAN1 in pan1	41	88	RS184_2
TAN1 in pan1	50	116	RS184_3
TAN1 in polar	40	92	RS185_1
TAN1 in polar	71	124	RS185_2
TAN1 in polar	29	84	RS185_3
TAN1 in polar	23	88	RS186_1
TAN1 in polar	53	144	RS186_2
TAN1 in WT	4	92	RS189_1
TAN1 in WT	4	104	RS189_2
TAN1 in WT	2	110	RS189_3
TAN1 in WT	3	124	RS189_4
TAN1 in pan1	44	108	RS190_1
TAN1 in pan1	67	128	RS190_2
TAN1 in pan1	51	107	RS190_3
TAN1 in polar	50	132	RS191_1
TAN1 in WT	5	85	RS192_1
TAN1 in WT	2	76	RS192_2
TAN1 in WT	4	78	RS192_3
TAN1 in WT	1	79	RS192_4
TAN1 in pan1	54	114	RS193_1
TAN1 in polar	33	118	RS194_1
TAN1 in polar	22	96	RS194_2
TAN1 in polar	9	32	RS194_3
TAN1 in polar	49	154	RS194_4

## Sheet: E_simultaneous_TAN1-localiz.
Quantifications of BdTAN1 localisation in bdpolar-1, bdpan1-1 and WT background.
Genotype	location	number
TAN1 in WT	R	59		R: correct location
TAN1 in WT	W	0		W: misplaced location
TAN1 in WT	three	0		three: three sites location
TAN1 in pan1	R	71
TAN1 in pan1	W	5
TAN1 in pan1	three	0
TAN1 in polar	R	76
TAN1 in polar	W	13
TAN1 in polar	three	2

## Sheet: F_simultaneous_distance
Quantifications of nuclear migration in BdTAN1 reporter lines in bdpolar-1, bdpan1-1 and WT background.
Genotype	GMC.L	GMC.W	GMC.ratio.L.W.	SC.a		Genotype	GMC.L	GMC.W	GMC.ratio.L.W.	SC.a		Genotype	GMC.L	GMC.W	GMC.ratio.L.W.	SC.a
TAN1 in pan1	7279	5535	1315086	3309		TAN1 in polar	5744	4842	1186287	3,61		TAN1 in WT	5251	5988	876921	3,63
TAN1 in pan1	7311	5054	1446577	3098		TAN1 in polar	5594	4934	1133766	2286		TAN1 in WT	5207	4975	1046633	3672
TAN1 in pan1	7311	5054	1446577	3422		TAN1 in polar	5594	4934	1133766	2,65		TAN1 in WT	5266	5958	883854	3981
TAN1 in pan1	8242	4873	1691361	2,83		TAN1 in polar	5694	5287	1076981	3039		TAN1 in WT	6409	4906	130636	2492
TAN1 in pan1	6,59	6226	1058465	3671		TAN1 in polar	5894	4662	1264264	3189		TAN1 in WT	4968	4741	104788	3141
TAN1 in pan1	6227	5204	119658	3025		TAN1 in polar	6554	4511	1452893	6107		TAN1 in WT	6186	5283	1170926	3171
TAN1 in pan1	4751	5575	852197	3563		TAN1 in polar	7487	3672	2038943	3571		TAN1 in WT	4634	5292	875661	3279
TAN1 in pan1	4,84	5564	869878	4021		TAN1 in polar	6856	4671	146778	2,9		TAN1 in WT	5272	5514	956112	2711
TAN1 in pan1	4389	5563	788963	4914		TAN1 in polar	5424	5092	10652	4158		TAN1 in WT	6943	4537	1530306	4217
TAN1 in pan1	4389	5563	788963	3967		TAN1 in polar	5791	5043	1148324	3851		TAN1 in WT	4728	5181	912565	4409
TAN1 in pan1	4217	5661	744921	3938		TAN1 in polar	4833	5734	842867	4724		TAN1 in WT	5391	5984	900902	3199
TAN1 in pan1	3427	6516	525936	4042		TAN1 in polar	5472	5117	1069377	3307		TAN1 in WT	5391	5984	900902	3081
TAN1 in pan1	5195	4729	1098541	5,71		TAN1 in polar	6194	4569	1355658	2,52		TAN1 in WT	5,14	5886	873259	3497
TAN1 in pan1	4,75	5261	90287	2887		TAN1 in polar	5825	5247	1110158	3372		TAN1 in WT	5,01	5148	973193	3995
TAN1 in pan1	4,75	5261	90287	3,58		TAN1 in polar	4832	6302	766741	4433		TAN1 in WT	6212	4816	1289867	2558
TAN1 in pan1	4813	5264	914324	4222		TAN1 in polar	4712	6305	747343	5639		TAN1 in WT	7846	4,6	1705652	2796
TAN1 in pan1	4813	5264	914324	2901		TAN1 in polar	5314	6007	884635	3,59		TAN1 in WT	7125	4507	1580874	4059
TAN1 in pan1	4741	5091	931251	2968		TAN1 in polar	5341	5933	900219	4393		TAN1 in WT	6231	4334	1437702	3597
TAN1 in pan1	5033	5128	981474	4414		TAN1 in polar	5341	5933	900219	3536		TAN1 in WT	6138	5057	1213763	3705
TAN1 in pan1	5022	5054	993668	3957		TAN1 in polar	5885	6312	932351	3521		TAN1 in WT	5898	4995	1180781	3,3
TAN1 in pan1	5001	5121	976567	6598		TAN1 in polar	5417	5691	951854	3,63		TAN1 in WT	5234	5625	930489	2947
TAN1 in pan1	5001	5121	976567	4607		TAN1 in polar	5417	5691	951854	3315		TAN1 in WT	5839	5236	1115164	2409
TAN1 in pan1	5035	4854	1037289	3827		TAN1 in polar	5414	5725	945677	3027		TAN1 in WT	5506	4937	1115252	3191
TAN1 in pan1	5569	5,3	1050755	4432		TAN1 in polar	6226	4812	1293849	2947		TAN1 in WT	5506	4937	1115252	3417
TAN1 in pan1	5516	5367	1027762	5807		TAN1 in polar	5965	6285	949085	2397		TAN1 in WT	4248	5154	824214	2769
TAN1 in pan1	5516	5367	1027762	3509		TAN1 in polar	5782	5,78	1000346	4,83		TAN1 in WT	4248	5154	824214	3101
TAN1 in pan1	5122	4873	1051098	3916		TAN1 in polar	4743	6322	750237	4314		TAN1 in WT	4872	6001	811865	4295
TAN1 in pan1	5513	5843	943522	3095		TAN1 in polar	4743	6322	750237	4,02		TAN1 in WT	4872	6001	811865	2882
TAN1 in pan1	5513	5843	943522	4319		TAN1 in polar	5,29	6158	859045	3237		TAN1 in WT	5682	5411	1050083	3309
TAN1 in pan1	5031	5468	92008	4,78		TAN1 in polar	5386	5959	903843	4655		TAN1 in WT	5682	5411	1050083	2647
TAN1 in pan1	5277	5,3	99566	3414		TAN1 in polar	5386	5959	903843	3304		TAN1 in WT	5249	5784	907503	2545
TAN1 in pan1	5277	5,3	99566	5846		TAN1 in polar	6,01	6194	970294	3921		TAN1 in WT	5325	5115	1041056	2166
TAN1 in pan1	7192	4289	1676848	3485		TAN1 in polar	6,1	6017	1013794	2625		TAN1 in WT	6255	6196	1009522	2739
TAN1 in pan1	5316	5,25	1012571	3817		TAN1 in polar	6,1	6017	1013794	2947		TAN1 in WT	6255	6196	1009522	2429
TAN1 in pan1	5316	5,25	1012571	4644		TAN1 in polar	6211	5254	1182147	4,46		TAN1 in WT	5775	5536	1043172	2963
TAN1 in pan1	5943	5334	1114173	6912		TAN1 in polar	6,72	4,65	1445161	3121		TAN1 in WT	5216	5,64	924823	3571
TAN1 in pan1	5943	5334	1114173	5041		TAN1 in polar	7448	4005	1859675	4283		TAN1 in WT	6037	5096	1184655	1875
TAN1 in pan1	5465	5421	1008117	4216		TAN1 in polar	8031	4,14	1939855	3375		TAN1 in WT	4267	5999	711285	3761
TAN1 in pan1	5661	5716	990378	3244		TAN1 in polar	4754	6308	753646	5098		TAN1 in WT	4495	6363	706428	2982
TAN1 in pan1	5661	5716	990378	4992		TAN1 in polar	4754	6308	753646	5118		TAN1 in WT	5,3	5752	921419	5955
TAN1 in pan1	5406	5554	973353	4725		TAN1 in polar	6589	5332	1235746	2216		TAN1 in WT	5218	5,78	902768	4,52
TAN1 in pan1	5243	6902	759635	4903		TAN1 in polar	6589	5332	1235746	2679		TAN1 in WT	4971	6572	756391	3373
TAN1 in pan1	5243	6902	759635	3512		TAN1 in polar	5468	5738	952945	2727		TAN1 in WT	4971	6572	756391	3564
TAN1 in pan1	5333	6628	804617	3561		TAN1 in polar	5468	5738	952945	3166		TAN1 in WT	6374	5549	1148675	2906
TAN1 in pan1	5333	6628	804617	4802		TAN1 in polar	5436	5351	1015885	3812		TAN1 in WT	6991	5,34	1309176	2792
TAN1 in pan1	5401	5604	963776	4674		TAN1 in polar	5436	5351	1015885	3842		TAN1 in WT	6534	5,45	1198899	2442
TAN1 in pan1	5965	5906	100999	3372		TAN1 in polar	5725	5216	1097584	3823		TAN1 in WT	6476	6178	1048236	3,06
TAN1 in pan1	5965	5906	100999	5673		TAN1 in polar	5135	5856	876878	4508		TAN1 in WT	4968	5902	841749	2773
TAN1 in pan1	5723	5397	1060404	5796		TAN1 in polar	4895	6757	724434	4137		TAN1 in WT	5717	5992	954105	3012
TAN1 in pan1	5741	5953	964388	5153		TAN1 in polar	4895	6757	724434	3,97		TAN1 in WT	7069	5496	1286208	3,36
TAN1 in pan1	5741	5953	964388	3287		TAN1 in polar	5439	5588	973336	4277		TAN1 in WT	7069	5496	1286208	3,2
TAN1 in pan1	4998	7311	683627	3146		TAN1 in polar	6066	5872	1033038	2944		TAN1 in WT	5207	5819	894827	4037
TAN1 in pan1	4998	7311	683627	3337		TAN1 in polar	6,86	5099	1345362	2396		TAN1 in WT	6,45	5852	1102187	3496
TAN1 in pan1	4157	6879	604303	4214		TAN1 in polar	6691	4781	1399498	2057		TAN1 in WT	5518	6,16	895779	3457
TAN1 in pan1	5921	7	845857	2132		TAN1 in polar	5938	4642	127919	3,28		TAN1 in WT	4446	5846	76052	3228
TAN1 in pan1	4,9	5742	853361	4984		TAN1 in polar	6961	4766	1460554	2233		TAN1 in WT	5138	5738	895434	4,15
TAN1 in pan1	5089	5323	95604	2683		TAN1 in polar	6539	4942	1323149	2674		TAN1 in WT	5138	5738	895434	2347
TAN1 in pan1	5141	5549	926473	4051		TAN1 in polar	5,8	5262	1102242	2734		TAN1 in WT	4771	5909	807412	3179
TAN1 in pan1	5234	5361	97631	2384		TAN1 in polar	6219	5049	1231729	2969		TAN1 in WT	4771	5909	807412	4743
TAN1 in pan1	5714	5309	1076286	4531		TAN1 in polar	6031	5731	1052347	3575
TAN1 in pan1	6254	5759	1085952	3984		TAN1 in polar	6153	5373	114517	3349
TAN1 in pan1	6254	5759	1085952	2791		TAN1 in polar	6452	5401	1194594	2818
TAN1 in pan1	4569	5859	779826	2587		TAN1 in polar	6219	5827	1067273	3033
TAN1 in pan1	4489	6118	733737	4121		TAN1 in polar	5698	5745	991819	3392
TAN1 in pan1	4489	6118	733737	3,12		TAN1 in polar	4,06	6125	662857	2856
TAN1 in pan1	5055	6169	81942	2855		TAN1 in polar	4,06	6125	662857	3276
TAN1 in pan1	5055	6169	81942	4058		TAN1 in polar	4597	6039	761219	4614
TAN1 in pan1	5286	5,91	894416	4963		TAN1 in polar	5512	5533	996205	3545
TAN1 in pan1	5423	6045	897105	3818		TAN1 in polar	5512	5533	996205	5608
TAN1 in pan1	5226	5653	924465	4,35		TAN1 in polar	6009	4445	1351856	2321
TAN1 in pan1	5,83	6611	881864	2695		TAN1 in polar	6,31	4206	1500238	3105
TAN1 in pan1	6944	5,44	1276471	2903		TAN1 in polar	6,31	4206	1500238	2109
TAN1 in pan1	7135	5901	1209117	2225		TAN1 in polar	6736	3755	1793875	2849
TAN1 in pan1	5724	6544	874694	2738		TAN1 in polar	6736	3755	1793875	5798
TAN1 in pan1	5139	5622	914088	2525		TAN1 in polar	4482	6091	73584	3864
TAN1 in pan1	6826	4838	1410914	2936		TAN1 in polar	4482	6091	73584	3364
TAN1 in pan1	6554	5204	1259416	3306		TAN1 in polar	5415	6202	873105	3829
TAN1 in pan1	6554	5204	1259416	3862		TAN1 in polar	5415	6202	873105	3013
TAN1 in pan1	6372	5319	119797	4104		TAN1 in polar	5225	6366	820767	3252
TAN1 in pan1	6372	5319	119797	3535		TAN1 in polar	6289	5927	1061076	4306
TAN1 in pan1	6,13	6118	1001961	3008		TAN1 in polar	5015	5801	864506	3644
TAN1 in pan1	5583	6512	85734	3657		TAN1 in polar	5947	5762	1032107	3035
TAN1 in pan1	5583	6512	85734	4218		TAN1 in polar	6344	6223	1019444	6179
TAN1 in pan1	5414	5591	968342	5159		TAN1 in polar	5,99	6325	947036	2787
TAN1 in pan1	5414	5591	968342	2,92		TAN1 in polar	6,95	5596	1241959	1896
TAN1 in pan1	6111	5541	110287	2734		TAN1 in polar	6803	5866	1159734	3218
TAN1 in pan1	5744	5832	984911	2692		TAN1 in polar	8065	5,36	1504664	1487
TAN1 in pan1	6,37	6101	1044091	3268		TAN1 in polar	7175	5945	1206897	2,58
TAN1 in pan1	5,92	5793	1021923	2799		TAN1 in polar	5622	6166	911774	2596
TAN1 in pan1	5618	5678	989433	4429		TAN1 in polar	4979	6623	751774	3326
TAN1 in pan1	5821	6466	900247	4218		TAN1 in polar	4738	6,27	755662	5547
TAN1 in pan1	6881	5436	126582	3232		TAN1 in polar	4726	6806	694387	3603
TAN1 in pan1	5388	6058	889402	3844		TAN1 in polar	4917	6153	799122	2848
TAN1 in pan1	5388	6058	889402	5509		TAN1 in polar	5511	6316	872546	1954
TAN1 in pan1	5363	7003	765815	4596		TAN1 in polar	6135	5641	1087573	2071
TAN1 in pan1	5285	5855	902647	4686		TAN1 in polar	5533	5,95	929916	3671
TAN1 in pan1	5885	5618	1047526	2554		TAN1 in polar	6114	5671	1078117	2583
TAN1 in pan1	3,97	6617	59997	6106		TAN1 in polar	5796	5976	96988	4395
TAN1 in pan1	4091	6497	629675	5342		TAN1 in polar	5796	5976	96988	3403
TAN1 in pan1	5083	6828	744435	2167		TAN1 in polar	5861	6138	954871	2785
TAN1 in pan1	5522	7216	765244	4524		TAN1 in polar	7056	5408	1304734	1774
TAN1 in pan1	5351	5856	913764	4747		TAN1 in polar	6162	4598	1340148	1863
TAN1 in pan1	5304	7238	732799	3,66		TAN1 in polar	6162	4598	1340148	2732
TAN1 in pan1	5942	6301	943025	3607		TAN1 in polar	5442	5111	1064762	2353
TAN1 in pan1	4392	6419	684219	4743		TAN1 in polar	6545	5622	1164176	2109
TAN1 in pan1	5179	6359	814436	6215		TAN1 in polar	5778	6048	955357	3691
TAN1 in pan1	5047	5916	85311	6054		TAN1 in polar	6364	5666	1123191	2564
TAN1 in pan1	4711	6255	753157	4284		TAN1 in polar	5,98	6182	967324	5,02
TAN1 in pan1	5385	6161	874046	3,48		TAN1 in polar	5,98	6182	967324	3404
TAN1 in pan1	5,06	6492	779421	6,1		TAN1 in polar	5024	5597	897624	4005
TAN1 in pan1	5,06	6492	779421	3663		TAN1 in polar	5145	5356	960605	3653
TAN1 in pan1	5654	5924	954423	4474		TAN1 in polar	5587	5808	961949	2646
TAN1 in pan1	5264	6071	867073	4171		TAN1 in polar	5209	6501	801261	3977
TAN1 in pan1	5264	6071	867073	5293		TAN1 in polar	4827	5953	810852	3216
TAN1 in pan1	5012	7414	676018	3707		TAN1 in polar	4871	5637	864112	3,25
TAN1 in pan1	5012	7414	676018	4501		TAN1 in polar	5502	5079	1083284	3971
TAN1 in pan1	5439	7174	758154	4464		TAN1 in polar	5109	4961	1029833	4,01
TAN1 in pan1	5439	7174	758154	4266		TAN1 in polar	5559	5229	106311	2585
TAN1 in pan1	4969	7853	632752	2735		TAN1 in polar	5624	5473	102759	3697
TAN1 in pan1	4826	7775	620707	2,62		TAN1 in polar	4234	6648	636883	3402
TAN1 in pan1	4,31	7649	563472	2905		TAN1 in polar	4414	6707	658118	4593
TAN1 in pan1	5697	6,83	834114	3975		TAN1 in polar	5218	5,49	950455	3463
TAN1 in pan1	6527	6751	96682	2,72		TAN1 in polar	4606	6,23	739326	3779
TAN1 in pan1	5575	6178	902396	3251		TAN1 in polar	4606	6,23	739326	3312
TAN1 in pan1	5575	6178	902396	5486		TAN1 in polar	5151	6196	831343	3767
TAN1 in pan1	5754	5974	963174	3259		TAN1 in polar	5151	6196	831343	3717
TAN1 in pan1	5836	5605	1041213	3369		TAN1 in polar	5415	6273	863223	3793
TAN1 in pan1	5342	6018	88767	3886		TAN1 in polar	4883	6233	783411	3535
TAN1 in pan1	5342	6018	88767	5159		TAN1 in polar	5,24	5602	93538	3557
TAN1 in pan1	5256	5653	929772	3424		TAN1 in polar	6449	4,52	142677	4436
TAN1 in pan1	6403	5796	1104727	3,93		TAN1 in polar	6449	4,52	142677	2985
TAN1 in pan1	5827	5,86	994369	3,42		TAN1 in polar	4669	5734	814266	2,86
TAN1 in pan1	7,58	4903	1545992	3069		TAN1 in polar	5651	5698	991751	2884
TAN1 in pan1	5684	5983	950025	2995		TAN1 in polar	4454	5851	761237	2954
TAN1 in pan1	4427	7,33	603956	4565		TAN1 in polar	4283	5298	808418	4094
TAN1 in pan1	4427	7,33	603956	4383		TAN1 in polar	4622	5435	850414	2772
TAN1 in pan1	4835	6735	717892	3457		TAN1 in polar	5623	5233	1074527	3565
TAN1 in pan1	4835	6735	717892	4281		TAN1 in polar	5623	5233	1074527	2971
TAN1 in pan1	4,78	6464	73948	5105		TAN1 in polar	4578	5569	822051	3986
TAN1 in pan1	4,78	6464	73948	6105		TAN1 in polar	4578	5569	822051	3217
TAN1 in pan1	5783	5362	1078515	3408		TAN1 in polar	7241	3966	1825769	3599
TAN1 in pan1	5695	6509	874942	3286		TAN1 in polar	5279	4194	1258703	3087
TAN1 in pan1	7051	6,28	1122771	4557		TAN1 in polar	4561	4832	943916	3098
TAN1 in pan1	5594	5295	1056468	2917		TAN1 in polar	5756	4761	120899	4045
TAN1 in pan1	5684	5714	99475	4,35		TAN1 in polar	5756	4761	120899	5354
TAN1 in pan1	4,69	6855	684172	4686		TAN1 in polar	6055	4549	1331062	3653
TAN1 in pan1	4,69	6855	684172	3978		TAN1 in polar	5492	5,28	1040152	2659
TAN1 in pan1	4608	6416	718204	4446		TAN1 in polar	4735	6069	780194	1961
TAN1 in pan1	4397	6635	662698	3072		TAN1 in polar	5459	5189	1052033	3271
TAN1 in pan1	5,11	5977	854944	4136
TAN1 in pan1	5,11	5977	854944	3253
TAN1 in pan1	5471	5106	1071485	5378
TAN1 in pan1	5471	5106	1071485	3301
TAN1 in pan1	5474	5714	957998	3586
TAN1 in pan1	6581	5235	1257116	3128
TAN1 in pan1	6324	5409	1169163	4215
TAN1 in pan1	5912	5616	1052707	4524
TAN1 in pan1	6537	5262	1242303	3,57
TAN1 in pan1	6,06	5559	1090124	4,22
