# Supplementary material for: Opposite polarity programs regulate asymmetric subsidiary cell divisions in grasses
Source: eLife. 2022 Dec 20;11:e79913. doi: 10.7554/eLife.79913 (PMC9767456; doi:10.7554/eLife.79913)
Supplement: Figure 4—figure supplement 2—source data 1. [file elife-79913-fig4-figsupp2-data1.xlsx]

## Sheet: C_division categories
Quantification of different SMC division categories in bdpolar-1 and bdpan1-1.
genotypes	No division	1 division	2 divisions	3 divisions	4 divisions	defective SCs	SCs
bdpan1-1	0	152	172	17	0	341	766
bdpolar-1	1	52	118	28	3	202	834

## Sheet: E,G_LWR at SC recruitment
Quantifications of GMC LWR in WT, bdpolar-1, bdpan1-1 and bdpolar-1;bdpan1-1 when GMCs recruited one and two SCs.
GMC with 1 SC			GMC with 2 SCs
genotype	GMC.ratio.L.W.		genotype	GMC.ratio.L.W.
WT	0.989151		WT	1.30454
WT	1.07411		WT	1.05346
WT	1.28455		WT	1.09618
WT	1.36879		WT	1.24015
WT	1.10268		WT	1.61709
WT	0.89951		WT	1.47023
WT	1.17244		WT	1.82157
WT	1.16263		WT	1.49934
WT	1.09503		WT	1.3974
WT	0.915843		WT	1.26232
WT	0.989966		WT	1.45507
WT	1.22726		WT	1.04813
WT	1.61116		WT	1.50987
WT	1.49101		WT	1.21087
WT	1.22791		WT	1.22086
WT	1.04219		WT	1.41886
WT	0.899668		WT	1.35095
WT	1.07379		WT	1.00361
WT	1.15476		WT	0.920374
WT	0.615712		WT	0.854551
WT	0.716068		WT	1.3719
WT	1.07781		WT	1.12234
WT	0.93125		WT	1.15737
WT	0.995584		WT	1.27307
WT	0.850671		WT	1.58402
WT	1.23641		WT	1.0879
WT	1.22168		WT	1.26945
WT	1.23378		WT	1.27347
WT	1.52661		WT	1.30084
WT	1.03932		WT	1.36517
WT	0.830969		WT	1.1263
WT	1.28704		WT	1.20801
WT	1.03987		WT	1.20687
WT	0.625321		WT	1.36046
WT	0.824455		WT	1.12353
WT	0.87546		WT	0.945247
WT	0.845778		WT	1.39577
WT	0.874607		WT	1.50894
WT	0.864819		WT	1.40991
WT	1.12306		WT	1.29928
WT	0.867513		WT	0.797816
WT	1.03339		WT	1.05079
WT	1.15773		WT	0.875405
WT	1.12839		WT	0.838443
WT	1.29516		WT	1.3523
WT	0.933569		WT	1.16693
WT	1.44063		WT	1.61601
WT	1.47551		WT	1.21138
WT	1.35273		WT	1.60126
WT	1.31327		WT	1.43013
WT	1.39798		WT	1.6625
WT	0.948416		WT	1.47713
WT	0.938805		WT	1.51075
WT	0.907394		WT	1.18151
WT	0.727827		WT	1.25976
WT	0.581538		WT	1.39888
WT	0.837801		WT	0.897603
WT	0.802696		WT	0.996929
WT	0.929069		WT	1.16254
WT	1.22585		WT	0.747542
WT	0.939478		WT	1.24917
WT	0.872885		WT	0.62041
WT	0.900913		WT	0.868703
WT	0.943349		WT	0.858925
WT	0.876912		WT	1.16154
WT	0.60718		WT	0.972723
WT	0.794769		WT	1.01432
WT	0.970927		WT	1.29628
WT	1.21278		WT	1.15218
WT	0.843315		WT	1.0371
WT	0.909622		WT	1.30664
WT	0.756474		WT	1.5137
WT	0.74829		WT	0.900606
WT	0.750087		WT	0.845957
WT	0.715803		WT	0.824675
WT	0.809478		WT	0.851833
WT	0.739669		WT	0.613137
WT	0.901129		WT	0.616672
WT	0.757504		WT	0.844698
WT	0.739381		WT	0.98652
WT	0.967871		WT	0.991778
WT	1.06277		WT	1.19034
WT	0.96364		WT	1.17005
WT	0.963093		WT	1.01365
WT	0.917065		WT	0.827179
WT	0.896334		WT	0.984133
WT	0.964446		WT	0.931999
WT	1.20577		WT	0.809384
WT	0.841646		WT	0.646958
WT	0.759323		WT	0.77454
WT	0.774075		WT	1.22981
WT	0.855276		WT	1.02163
WT	0.991755		WT	0.837408
WT	0.911274		WT	0.815157
WT	0.872348		WT	1.46978
WT	0.894563		WT	0.813903
WT	1.09296		WT	0.900959
WT	0.721797		WT	1.10826
WT	1.05934		WT	1.17578
WT	0.954636		WT	1.65713
WT	0.907731		WT	1.27577
bdpolar-1	1.04257		WT	1.39263
bdpolar-1	0.983991		WT	1.36539
bdpolar-1	1.17794		WT	0.996127
bdpolar-1	1.04386		WT	1.00697
bdpolar-1	1.22349		WT	0.99561
bdpolar-1	1.1364		WT	0.893165
bdpolar-1	1.02996		WT	0.873339
bdpolar-1	1.2723		WT	1.16814
bdpolar-1	1.27756		WT	1.07306
bdpolar-1	1.05017		WT	1.28748
bdpolar-1	0.940451		WT	0.933788
bdpolar-1	1.23256		WT	1.10101
bdpolar-1	1.2661		WT	1.05451
bdpolar-1	1.14024		WT	1.54952
bdpolar-1	0.9429		WT	1.36238
bdpolar-1	0.920065		WT	0.928611
bdpolar-1	1.14023		WT	1.18401
bdpolar-1	1.16945		WT	1.0208
bdpolar-1	1.25952		WT	1.28626
bdpolar-1	1.02961		WT	0.927269
bdpolar-1	1.1062		WT	1.22452
bdpolar-1	1.13011		WT	1.1442
bdpolar-1	1.15761		WT	1.09603
bdpolar-1	1.0775		WT	0.847437
bdpolar-1	0.96077		WT	1.01957
bdpolar-1	1.49575		WT	1.38716
bdpolar-1	1.23508		WT	1.28095
bdpolar-1	1.44579		WT	1.14865
bdpolar-1	1.12909		WT	1.02555
bdpolar-1	1.15881		WT	0.84794
bdpolar-1	1.28381		WT	1.07181
bdpolar-1	0.89649		WT	0.981575
bdpolar-1	1.25291		bdpolar-1	1.24367
bdpolar-1	1.37204		bdpolar-1	1.2004
bdpolar-1	1.09645		bdpolar-1	1.37291
bdpolar-1	0.85571		bdpolar-1	1.34628
bdpolar-1	1.65591		bdpolar-1	1.26907
bdpolar-1	1.23404		bdpolar-1	1.45753
bdpolar-1	1.30187		bdpolar-1	1.37171
bdpolar-1	1.3863		bdpolar-1	1.56378
bdpolar-1	1.55983		bdpolar-1	1.69967
bdpolar-1	1.72943		bdpolar-1	1.66038
bdpolar-1	0.946463		bdpolar-1	1.11725
bdpolar-1	1.17608		bdpolar-1	1.15927
bdpolar-1	1.30404		bdpolar-1	1.37314
bdpolar-1	0.992155		bdpolar-1	1.52985
bdpolar-1	0.970136		bdpolar-1	1.10951
bdpolar-1	1.21622		bdpolar-1	1.44939
bdpolar-1	0.976799		bdpolar-1	1.59939
bdpolar-1	1.06213		bdpolar-1	1.04185
bdpolar-1	1.15721		bdpolar-1	1.40583
bdpolar-1	1.22801		bdpolar-1	1.33276
bdpolar-1	1.17217		bdpolar-1	1.32854
bdpolar-1	1.24155		bdpolar-1	1.23867
bdpolar-1	1.39081		bdpolar-1	1.29142
bdpolar-1	0.900758		bdpolar-1	1.33928
bdpolar-1	0.880286		bdpolar-1	1.26996
bdpolar-1	1.08831		bdpolar-1	1.24978
bdpolar-1	0.95838		bdpolar-1	1.23486
bdpolar-1	1.09809		bdpolar-1	1.22491
bdpolar-1	0.683811		bdpolar-1	1.09659
bdpolar-1	0.974247		bdpolar-1	1.28445
bdpolar-1	1.0395		bdpolar-1	1.23735
bdpolar-1	1.09053		bdpolar-1	1.28623
bdpolar-1	1.09545		bdpolar-1	1.37622
bdpolar-1	0.870591		bdpolar-1	1.57209
bdpolar-1	0.807365		bdpolar-1	1.62304
bdpolar-1	0.955776		bdpolar-1	1.73758
bdpolar-1	0.991723		bdpolar-1	1.55387
bdpolar-1	1.42556		bdpolar-1	1.96099
bdpolar-1	1.27181		bdpolar-1	2.04143
bdpolar-1	1.21302		bdpolar-1	1.56858
bdpolar-1	1.21958		bdpolar-1	1.29458
bdpolar-1	1.24151		bdpolar-1	1.00693
bdpolar-1	1.21055		bdpolar-1	1.1547
bdpolar-1	0.793999		bdpolar-1	1.51427
bdpolar-1	0.93004		bdpolar-1	1.27733
bdpolar-1	0.891315		bdpolar-1	1.40012
bdpolar-1	0.822483		bdpolar-1	1.80354
bdpolar-1	1.08044		bdpolar-1	1.98962
bdpolar-1	1.05894		bdpolar-1	1.97222
bdpolar-1	1.08821		bdpolar-1	1.62417
bdpolar-1	1.03682		bdpolar-1	1.87251
bdpolar-1	0.888945		bdpolar-1	1.46276
bdpolar-1	1.12626		bdpolar-1	1.75449
bdpolar-1	0.987491		bdpolar-1	1.79894
bdpolar-1	1.25722		bdpolar-1	2.06683
bdpolar-1	0.80718		bdpolar-1	1.8921
bdpolar-1	1.03131		bdpolar-1	1.3158
bdpolar-1	1.04764		bdpolar-1	1.5614
bdpolar-1	0.908104		bdpolar-1	1.35785
bdpolar-1	1.0573		bdpolar-1	1.31448
bdpolar-1	0.887938		bdpolar-1	0.969749
bdpolar-1	1.11546		bdpolar-1	0.988118
bdpolar-1	1.25136		bdpolar-1	1.41683
bdpolar-1	1.38661		bdpolar-1	1.34752
bdpolar-1	1.14718		bdpolar-1	0.938844
bdpolar-1	1.16909		bdpolar-1	1.00291
bdpolar-1	0.919364		bdpolar-1	1.21088
bdpolar-1	0.796683		bdpolar-1	1.12729
bdpolar-1	0.868696		bdpolar-1	1.52615
bdpolar-1	0.877175		bdpolar-1	1.28212
bdpolar-1	1.3392		bdpolar-1	0.912288
bdpolar-1	0.934091		bdpolar-1	1.09328
bdpolar-1	0.9871		bdpolar-1	1.09594
bdpolar-1	1.10842		bdpolar-1	1.25082
bdpolar-1	1.11906		bdpolar-1	1.17792
bdpolar-1	1.10476		bdpolar-1	1.04419
bdpolar-1	1.37229		bdpolar-1	1.29327
bdpolar-1	1.08827		bdpolar-1	1.11267
bdpolar-1	1.0938		bdpolar-1	1.10364
bdpolar-1	0.834751		bdpolar-1	1.00794
bdpolar-1	1.28292		bdpolar-1	1.18037
bdpolar-1	0.902922		bdpolar-1	1.31374
bdpolar-1	1.10623		bdpolar-1	1.14351
bdpolar-1	1.05975		bdpolar-1	1.15213
bdpolar-1	1.17911		bdpolar-1	1.24078
bdpolar-1	0.953204		bdpolar-1	1.08755
bdpolar-1	1.29625		bdpolar-1	1.24028
bdpolar-1	1.10541		bdpolar-1	1.18187
bdpolar-1	0.966023		bdpolar-1	1.13553
bdpolar-1	1.20681		bdpolar-1	1.47169
bdpan1-1	0.989151		bdpolar-1	1.34146
bdpan1-1	1.07411		bdpolar-1	1.2656
bdpan1-1	1.28455		bdpolar-1	1.11192
bdpan1-1	1.36879		bdpolar-1	1.38799
bdpan1-1	1.10268		bdpolar-1	1.20279
bdpan1-1	0.89951		bdpolar-1	1.13633
bdpan1-1	1.17244		bdpolar-1	1.39925
bdpan1-1	1.16263		bdpolar-1	1.05258
bdpan1-1	1.09503		bdpolar-1	1.25735
bdpan1-1	0.915843		bdpolar-1	1.371
bdpan1-1	0.989966		bdpolar-1	1.10459
bdpan1-1	1.22726		bdpolar-1	1.10396
bdpan1-1	1.61116		bdpolar-1	1.35252
bdpan1-1	1.49101		bdpolar-1	1.27754
bdpan1-1	1.22791		bdpolar-1	1.35837
bdpan1-1	1.04219		bdpolar-1	1.40127
bdpan1-1	0.899668		bdpolar-1	1.52669
bdpan1-1	1.07379		bdpolar-1	1.43404
bdpan1-1	1.15476		bdpolar-1	1.32707
bdpan1-1	0.615712		bdpolar-1	1.35771
bdpan1-1	0.716068		bdpolar-1	1.27432
bdpan1-1	1.07781		bdpolar-1	0.992297
bdpan1-1	0.93125		bdpolar-1	1.38749
bdpan1-1	0.995584		bdpolar-1	1.06058
bdpan1-1	0.850671		bdpolar-1	1.25041
bdpan1-1	1.23641		bdpolar-1	0.921159
bdpan1-1	1.22168		bdpolar-1	0.954561
bdpan1-1	1.23378		bdpolar-1	0.847743
bdpan1-1	1.52661		bdpolar-1	1.44218
bdpan1-1	1.03932		bdpolar-1	1.11042
bdpan1-1	0.830969		bdpolar-1	1.11162
bdpan1-1	1.28704		bdpolar-1	1.65853
bdpan1-1	1.03987		bdpolar-1	1.13911
bdpan1-1	0.625321		bdpolar-1	1.3669
bdpan1-1	0.824455		bdpan1-1	1.30454
bdpan1-1	0.87546		bdpan1-1	1.05346
bdpan1-1	0.845778		bdpan1-1	1.09618
bdpan1-1	0.874607		bdpan1-1	1.24015
bdpan1-1	0.864819		bdpan1-1	1.61709
bdpan1-1	1.12306		bdpan1-1	1.47023
bdpan1-1	0.867513		bdpan1-1	1.82157
bdpan1-1	1.03339		bdpan1-1	1.49934
bdpan1-1	1.15773		bdpan1-1	1.3974
bdpan1-1	1.12839		bdpan1-1	1.26232
bdpan1-1	1.29516		bdpan1-1	1.45507
bdpan1-1	0.933569		bdpan1-1	1.04813
bdpan1-1	1.44063		bdpan1-1	1.50987
bdpan1-1	1.47551		bdpan1-1	1.21087
bdpan1-1	1.35273		bdpan1-1	1.22086
bdpan1-1	1.31327		bdpan1-1	1.41886
bdpan1-1	1.39798		bdpan1-1	1.35095
bdpan1-1	0.948416		bdpan1-1	1.00361
bdpan1-1	0.938805		bdpan1-1	0.920374
bdpan1-1	1.083		bdpan1-1	0.854551
bdpan1-1	0.931098		bdpan1-1	1.3719
bdpan1-1	1.06359		bdpan1-1	1.12234
bdpan1-1	1.0303		bdpan1-1	1.15737
bdpan1-1	1.04261		bdpan1-1	1.27307
bdpan1-1	1.37512		bdpan1-1	1.58402
bdpan1-1	1.45326		bdpan1-1	1.0879
bdpan1-1	1.14072		bdpan1-1	1.26945
bdpan1-1	1.29546		bdpan1-1	1.27347
bdpan1-1	1.04167		bdpan1-1	1.30084
bdpan1-1	0.894405		bdpan1-1	1.36517
bdpan1-1	1.01804		bdpan1-1	1.1263
bdpan1-1	1.1129		bdpan1-1	1.20801
bdpan1-1	1.18996		bdpan1-1	1.20687
bdpan1-1	0.809431		bdpan1-1	1.36046
bdpan1-1	0.759288		bdpan1-1	1.12353
bdpan1-1	0.699984		bdpan1-1	0.945247
bdpan1-1	1.01865		bdpan1-1	1.39577
bdpan1-1	0.72681		bdpan1-1	1.50894
bdpan1-1	1.04996		bdpan1-1	1.40991
bdpan1-1	0.852857		bdpan1-1	1.29928
bdpan1-1	1.0028		bdpan1-1	0.797816
bdpan1-1	0.857143		bdpan1-1	1.05079
bdpan1-1	0.96403		bdpan1-1	0.875405
bdpan1-1	0.915556		bdpan1-1	0.838443
bdpan1-1	0.781283		bdpan1-1	1.3523
bdpan1-1	0.858082		bdpan1-1	1.16693
bdpan1-1	0.950459		bdpan1-1	1.61601
bdpan1-1	0.916469		bdpan1-1	1.21138
bdpan1-1	0.818456		bdpan1-1	1.60126
bdpan1-1	1.06987		bdpan1-1	1.43013
bdpan1-1	1.02202		bdpan1-1	1.6625
bdpan1-1	1.18653		bdpan1-1	1.47713
bdpan1-1	1.4311		bdpan1-1	1.51075
bdpan1-1	1.11969		bdpan1-1	1.18151
bdpan1-1	1.13815		bdpan1-1	1.25976
bdpan1-1	0.928673		bdpan1-1	1.39888
bdpan1-1	0.660389		bdpan1-1	0.897603
bdpan1-1	1.05375		bdpan1-1	0.996929
bdpan1-1	1.09494		bdpan1-1	1.16254
bdpan1-1	1.27403		bdpan1-1	0.961286
bdpan1-1	1.20272		bdpan1-1	1.07025
bdpan1-1	0.795946		bdpan1-1	1.19063
bdpan1-1	0.831058		bdpan1-1	1.04431
bdpan1-1	1.10236		bdpan1-1	1.32738
bdpan1-1	0.864164		bdpan1-1	1.26758
bdpan1-1	1.05471		bdpan1-1	1.43859
bdpan1-1	1.16903		bdpan1-1	1.15711
bdpan1-1	1.14577		bdpan1-1	1.13836
bdpolar-1;bdpan1-1	1.08998		bdpan1-1	1.21633
bdpolar-1;bdpan1-1	1.44989		bdpan1-1	1.80727
bdpolar-1;bdpan1-1	1.17175		bdpan1-1	1.09964
bdpolar-1;bdpan1-1	1.35094		bdpan1-1	1.28678
bdpolar-1;bdpan1-1	1.21949		bdpan1-1	1.6962
bdpolar-1;bdpan1-1	1.37532		bdpan1-1	1.20362
bdpolar-1;bdpan1-1	1.55102		bdpan1-1	1.42262
bdpolar-1;bdpan1-1	1.53237		bdpan1-1	1.15369
bdpolar-1;bdpan1-1	1.35275		bdpan1-1	1.44854
bdpolar-1;bdpan1-1	1.60785		bdpan1-1	1.21079
bdpolar-1;bdpan1-1	1.66531		bdpan1-1	1.49449
bdpolar-1;bdpan1-1	1.52784		bdpan1-1	0.909942
bdpolar-1;bdpan1-1	1.63933		bdpan1-1	1.26554
bdpolar-1;bdpan1-1	1.5885		bdpan1-1	1.26796
bdpolar-1;bdpan1-1	1.82331		bdpan1-1	1.19475
bdpolar-1;bdpan1-1	1.44447		bdpan1-1	1.13134
bdpolar-1;bdpan1-1	1.18259		bdpan1-1	1.18164
bdpolar-1;bdpan1-1	1.09207		bdpan1-1	1.0625
bdpolar-1;bdpan1-1	1.34522		bdpan1-1	1
bdpolar-1;bdpan1-1	1.38639		bdpan1-1	1.06595
bdpolar-1;bdpan1-1	1.30513		bdpan1-1	0.992663
bdpolar-1;bdpan1-1	1.32093		bdpan1-1	0.952771
bdpolar-1;bdpan1-1	0.96744		bdpan1-1	1.01608
bdpolar-1;bdpan1-1	1.21513		bdpan1-1	1.05352
bdpolar-1;bdpan1-1	0.944207		bdpan1-1	1.07569
bdpolar-1;bdpan1-1	1.0897		bdpan1-1	0.880754
bdpolar-1;bdpan1-1	1.17143		bdpan1-1	1.11031
bdpolar-1;bdpan1-1	1.47962		bdpan1-1	1.47268
bdpolar-1;bdpan1-1	1.278		bdpan1-1	1.30058
bdpolar-1;bdpan1-1	1.16134		bdpan1-1	1.00337
bdpolar-1;bdpan1-1	1.14143		bdpan1-1	0.920814
bdpolar-1;bdpan1-1	1.00946		bdpan1-1	1.0295
bdpolar-1;bdpan1-1	1.17049		bdpan1-1	1.59547
bdpolar-1;bdpan1-1	0.958312		bdpan1-1	0.954196
bdpolar-1;bdpan1-1	1.12116		bdpan1-1	1.13758
bdpolar-1;bdpan1-1	0.738588		bdpan1-1	0.996325
bdpolar-1;bdpan1-1	0.867684		bdpan1-1	1.09327
bdpolar-1;bdpan1-1	0.828991		bdpan1-1	1.19176
bdpolar-1;bdpan1-1	0.878487		bdpan1-1	1.47308
bdpolar-1;bdpan1-1	0.813867		bdpan1-1	0.990152
bdpolar-1;bdpan1-1	0.893876		bdpan1-1	0.881106
bdpolar-1;bdpan1-1	0.99604		bdpan1-1	1.09292
bdpolar-1;bdpan1-1	1.06328		bdpan1-1	0.909598
bdpolar-1;bdpan1-1	1.46282		bdpan1-1	1.12157
bdpolar-1;bdpan1-1	1.06198		bdpan1-1	1.0897
bdpolar-1;bdpan1-1	1.14876		bdpan1-1	0.935106
bdpolar-1;bdpan1-1	1.4068		bdpan1-1	1.07426
bdpolar-1;bdpan1-1	1.17048		bdpan1-1	1.15083
bdpolar-1;bdpan1-1	1.15408		bdpan1-1	1.07792
bdpolar-1;bdpan1-1	0.97329		bdpolar-1;bdpan1-1	1.20849
bdpolar-1;bdpan1-1	1.46356		bdpolar-1;bdpan1-1	1.42809
bdpolar-1;bdpan1-1	1.31785		bdpolar-1;bdpan1-1	1.39842
bdpolar-1;bdpan1-1	1.22625		bdpolar-1;bdpan1-1	1.21881
bdpolar-1;bdpan1-1	1.14581		bdpolar-1;bdpan1-1	1.17524
bdpolar-1;bdpan1-1	1.28571		bdpolar-1;bdpan1-1	1.40165
bdpolar-1;bdpan1-1	1.08703		bdpolar-1;bdpan1-1	1.48431
bdpolar-1;bdpan1-1	0.882299		bdpolar-1;bdpan1-1	1.20732
bdpolar-1;bdpan1-1	1.303		bdpolar-1;bdpan1-1	1.45251
bdpolar-1;bdpan1-1	1.21076		bdpolar-1;bdpan1-1	1.28451
bdpolar-1;bdpan1-1	0.964921		bdpolar-1;bdpan1-1	1.48873
bdpolar-1;bdpan1-1	1.43182		bdpolar-1;bdpan1-1	1.41498
bdpolar-1;bdpan1-1	1.41302		bdpolar-1;bdpan1-1	1.44688
bdpolar-1;bdpan1-1	1.01924		bdpolar-1;bdpan1-1	1.42257
bdpolar-1;bdpan1-1	0.856484		bdpolar-1;bdpan1-1	1.58036
bdpolar-1;bdpan1-1	1.30752		bdpolar-1;bdpan1-1	1.37494
bdpolar-1;bdpan1-1	1.18617		bdpolar-1;bdpan1-1	1.27414
bdpolar-1;bdpan1-1	1.08459		bdpolar-1;bdpan1-1	0.853801
bdpolar-1;bdpan1-1	1.12652		bdpolar-1;bdpan1-1	1.47756
bdpolar-1;bdpan1-1	1.1754		bdpolar-1;bdpan1-1	1.23256
			bdpolar-1;bdpan1-1	1.44503
			bdpolar-1;bdpan1-1	1.30166
			bdpolar-1;bdpan1-1	1.253
			bdpolar-1;bdpan1-1	1.33992
			bdpolar-1;bdpan1-1	1.60427
			bdpolar-1;bdpan1-1	1.58918
			bdpolar-1;bdpan1-1	1.38508
			bdpolar-1;bdpan1-1	1.4371
			bdpolar-1;bdpan1-1	1.45644
			bdpolar-1;bdpan1-1	1.19993
			bdpolar-1;bdpan1-1	1.79461
			bdpolar-1;bdpan1-1	1.67742
			bdpolar-1;bdpan1-1	1.28046
			bdpolar-1;bdpan1-1	1.31218
			bdpolar-1;bdpan1-1	1.75479
			bdpolar-1;bdpan1-1	1.24031
			bdpolar-1;bdpan1-1	1.20272
			bdpolar-1;bdpan1-1	1.19103
			bdpolar-1;bdpan1-1	1.05786
			bdpolar-1;bdpan1-1	1.27784
			bdpolar-1;bdpan1-1	1.15641
			bdpolar-1;bdpan1-1	1.07181
			bdpolar-1;bdpan1-1	0.717414
			bdpolar-1;bdpan1-1	1.12061
			bdpolar-1;bdpan1-1	1.42797
			bdpolar-1;bdpan1-1	1.09405
			bdpolar-1;bdpan1-1	1.2634
			bdpolar-1;bdpan1-1	1.26767
			bdpolar-1;bdpan1-1	1.17994
			bdpolar-1;bdpan1-1	1.27228
			bdpolar-1;bdpan1-1	1.06352
			bdpolar-1;bdpan1-1	1.14382
			bdpolar-1;bdpan1-1	1.61421
			bdpolar-1;bdpan1-1	1.56569
			bdpolar-1;bdpan1-1	1.32773
			bdpolar-1;bdpan1-1	1.27043
			bdpolar-1;bdpan1-1	1.28757
			bdpolar-1;bdpan1-1	1.28812
			bdpolar-1;bdpan1-1	1.31027
			bdpolar-1;bdpan1-1	1.52548
			bdpolar-1;bdpan1-1	1.51164
			bdpolar-1;bdpan1-1	1.19389
			bdpolar-1;bdpan1-1	1.13689
			bdpolar-1;bdpan1-1	1.40395
			bdpolar-1;bdpan1-1	1.11188
			bdpolar-1;bdpan1-1	1.32323
			bdpolar-1;bdpan1-1	0.983666
			bdpolar-1;bdpan1-1	1.23138
			bdpolar-1;bdpan1-1	1.28558
			bdpolar-1;bdpan1-1	1.22653
			bdpolar-1;bdpan1-1	1.20172
			bdpolar-1;bdpan1-1	1.14002
