# Supplementary material for: Opposite polarity programs regulate asymmetric subsidiary cell divisions in grasses
Source: eLife. 2022 Dec 20;11:e79913. doi: 10.7554/eLife.79913 (PMC9767456; doi:10.7554/eLife.79913)
Supplement: Figure 4—source data 1. [file elife-79913-fig4-data1.xlsx]

## Sheet: 4C_distance
Quantification of a distance in SMCs of WT, bdpolar-1, bdpan1-1, and bdpolar-1;bdpan1-1 (only SMCs flanking GMCs with a LWR>0.9 are shown in Fig. 4C) .
WT								bdpolar-1
SMCs	GMC.L (µm)	GMC.W (µm)	GMC.ratio.L.W.	SC.a (µm)	number	Replicate		SMCs	GMC.L (µm)	GMC.W (µm)	GMC.ratio.L.W.	SC.a (µm)	number	Replicate
001_1	4.42	5.549	0.79654	3.567	1	R3		001_1	5.119	5.382	0.951133	2.718	1	R3
001_2	3.716	5.535	0.671364	3.01	2	R3		001_2	5.23	5.488	0.952988	3.096	2	R3
001_3	3.611	5.521	0.654048	3.216	3	R3		001_3	5.186	5.01	1.03513	4.106	3	R3
001_4	3.611	5.521	0.654048	3.187	4	R3		001_4	5.524	4.985	1.10812	3.571	4	R3
003_1	5.086	5.795	0.877653	3.166	5	R3		001_5	5.524	4.985	1.10812	3.183	5	R3
003_2	5.086	5.795	0.877653	3.751	6	R3		001_6	4.923	5.565	0.884636	3.169	6	R3
004_1	4.465	4.87	0.916838	3.38	7	R3		001_7	5.141	5.036	1.02085	3.38	7	R3
004_2	5.153	5.823	0.884939	3.934	8	R3		002_1	5.873	5.301	1.1079	4.203	8	R3
004_3	5.153	5.823	0.884939	2.976	9	R3		002_2	4.57	6.062	0.753877	5.659	9	R3
005_1	5.054	4.97	1.0169	3.194	10	R3		002_3	4.392	6.463	0.679561	4.494	10	R3
005_2	5.054	4.97	1.0169	2.995	11	R3		002_4	5.458	5.819	0.937962	4.292	11	R3
005_3	5.532	4.089	1.3529	2.538	12	R3		002_5	5.458	5.819	0.937962	3.67	12	R3
005_4	4.3	4.512	0.953014	3.269	13	R3		002_6	3.992	6.359	0.627772	3.755	13	R3
005_5	4.3	4.512	0.953014	2.986	14	R3		002_7	3.992	6.359	0.627772	7.032	14	R3
005_6	5.718	3.552	1.6098	3.367	15	R3		003_1	5.503	5.262	1.0458	3.578	15	R3
006_1	4.695	5.018	0.935632	2.892	16	R3		003_2	5.503	5.262	1.0458	3.147	16	R3
006_2	4.511	5.508	0.818991	2.48	17	R3		003_3	5.548	4.828	1.14913	2.803	17	R3
006_3	4.584	5.55	0.825946	3.032	18	R3		003_4	5.548	4.828	1.14913	3.767	18	R3
006_4	4.584	5.55	0.825946	2.795	19	R3		003_5	5.833	5.622	1.03753	2.889	19	R3
007_1	3.517	6.198	0.567441	3.878	20	R3		003_6	6.249	5.301	1.17883	3.052	20	R3
007_2	4.961	6.316	0.785465	4.04	21	R3		004_1	4.03	6.44	0.625776	3.977	21	R3
007_3	5.231	6.229	0.839782	4.038	22	R3		004_2	4.03	6.44	0.625776	2.677	22	R3
009_1	3.938	5.592	0.70422	3.774	23	R3		004_3	5.502	5.503	0.999818	3.719	23	R3
009_2	3.882	5.413	0.717162	3.128	24	R3		004_4	5.502	5.503	0.999818	3.181	24	R3
009_3	4.57	4.993	0.915281	3.68	25	R3		004_5	6.415	5.548	1.15627	3.905	25	R3
010_1	5.081	5.562	0.91352	3.159	26	R3		004_6	6.415	5.548	1.15627	3.698	26	R3
010_2	5.081	5.562	0.91352	2.798	27	R3		004_7	5.73	5.795	0.988783	3.138	27	R3
010_3	5.023	5.296	0.948452	3.548	28	R3		004_8	5.73	5.795	0.988783	3.399	28	R3
010_4	4.692	5.299	0.88545	3.959	29	R3		004_9	5.57	6.021	0.925095	2.729	29	R3
010_5	4.692	5.299	0.88545	3.309	30	R3		004_10	5.57	6.021	0.925095	6.021	30	R3
010_6	4.399	6.091	0.722213	2.697	31	R3		005_1	5.742	5.592	1.02682	2.48	31	R3
010_7	4.399	6.091	0.722213	3.48	32	R3		005_2	5.931	5.62	1.05534	3.786	32	R3
010_8	3.703	6.229	0.594477	2.529	33	R3		005_3	4.763	5.879	0.810172	3.039	33	R3
011_1	5.013	4.227	1.18595	2.947	34	R3		005_4	4.763	5.879	0.810172	3.473	34	R3
011_2	3.901	5.3	0.736038	3.486	35	R3		005_5	4.976	5.877	0.84669	4.449	35	R3
011_3	3.901	5.3	0.736038	2.995	36	R3		005_6	4.976	5.877	0.84669	4.941	36	R3
011_4	3.818	5.202	0.733948	2.909	37	R3		005_7	4.652	6.585	0.706454	3.85	37	R3
011_5	3.743	5.622	0.665777	2.81	38	R3		005_8	4.652	6.585	0.706454	4.44	38	R3
011_6	5.021	4.993	1.00561	2.13	39	R3		006_1	5.747	5.845	0.983234	3.272	39	R3
011_7	5.021	4.993	1.00561	2.708	40	R3		006_2	5.163	5.821	0.886961	3.494	40	R3
012_1	4.631	5.863	0.789869	4.098	41	R3		006_3	5.777	5.692	1.01493	3.409	41	R3
012_2	4.631	5.863	0.789869	4.805	42	R3		006_4	5.777	5.692	1.01493	3.342	42	R3
012_3	4.51	5.243	0.860195	3.058	43	R3		006_5	5.824	5.702	1.0214	3.397	43	R3
012_4	4.51	5.243	0.860195	3.834	44	R3		006_6	5.818	5.817	1.00017	5.189	44	R3
013_1	4.809	6.05	0.794876	3.885	45	R3		006_7	5.525	5.39	1.02505	4.508	45	R3
013_2	4.809	6.05	0.794876	3.199	46	R3		006_8	5.525	5.39	1.02505	3.339	46	R3
013_3	4.399	5.913	0.743954	3.34	47	R3		006_9	5.536	5.984	0.925134	4.322	47	R3
013_4	4.419	6.232	0.709082	2.864	48	R3		006_10	5.536	5.984	0.925134	3.646	48	R3
013_5	4.315	6.064	0.711577	2.916	49	R3		006_11	5.622	5.953	0.944398	4.162	49	R3
013_6	4.315	6.064	0.711577	2.945	50	R3		007_1	5.475	5.481	0.998905	2.396	50	R3
014_1	5.264	5.577	0.943877	3.426	51	R3		007_2	5.335	5.859	0.910565	2.7	51	R3
014_2	4.329	5.952	0.727319	4.231	52	R3		007_3	4.222	5.95	0.70958	2.52	52	R3
014_3	4.329	5.952	0.727319	5.254	53	R3		008_1	5.206	5.531	0.94124	4.196	53	R3
014_4	5.006	5.705	0.877476	3.184	54	R3		008_2	3.937	5.965	0.660017	3.911	54	R3
014_5	5.006	5.705	0.877476	2.999	55	R3		008_3	4.082	5.367	0.760574	4.377	55	R3
014_6	4.712	5.863	0.803684	2.892	56	R3		008_4	4.322	5.915	0.730685	3.366	56	R3
015_1	5.712	5.898	0.968464	3.326	57	R3		009_1	4.977	5.752	0.865264	2.973	57	R3
015_2	5.712	5.898	0.968464	3.058	58	R3		009_2	3.959	5.725	0.691528	5.245	58	R3
015_3	5.411	5.236	1.03342	3.923	59	R3		009_3	4.375	5.919	0.739145	2.862	59	R3
015_4	4.195	6.516	0.6438	4.722	60	R3		010_1	4.72	6.404	0.737039	4.007	60	R3
015_5	4.51	6.524	0.691294	4.015	61	R3		010_2	4.72	6.404	0.737039	6.567	61	R3
015_6	4.713	7.028	0.670603	3.561	62	R3		011_1	3.435	6.276	0.547323	5.026	62	R3
015_7	4.713	7.028	0.670603	4.197	63	R3		011_2	4.78	6.676	0.715998	3.539	63	R3
016_1	4.962	5.037	0.98511	3.557	64	R3		011_3	5.322	5.683	0.936477	4.282	64	R3
016_2	4.451	4.659	0.955355	3.818	65	R3		011_4	4.209	6.825	0.616703	4.5	65	R3
016_3	4.532	5.233	0.866042	3.136	66	R3		012_1	4.917	7.488	0.656651	3.814	66	R3
016_4	4.487	5.569	0.80571	2.8	67	R3		012_2	5.712	6.345	0.900236	4.639	67	R3
016_5	5.978	5.891	1.01477	3.761	68	R3		012_3	4.6	7.456	0.616953	3.237	68	R3
016_6	5.978	5.891	1.01477	3.469	69	R3		012_4	4.217	7.463	0.565054	4.149	69	R3
017_1	4.277	4.43	0.965463	2.709	70	R3		013_1	3.796	6.38	0.594984	4.113	70	R3
017_2	4.039	4.919	0.821102	2.872	71	R3		013_2	3.796	6.38	0.594984	4.211	71	R3
017_3	4.645	5.591	0.830799	2.695	72	R3		013_3	4.059	6.049	0.67102	7.55	72	R3
018_1	3.698	5.684	0.650598	3.789	73	R3		013_4	4.382	5.778	0.758394	3.975	73	R3
018_2	4.398	5.773	0.761822	3.275	74	R3		013_5	4.382	5.778	0.758394	4.818	74	R3
018_3	4.487	5.234	0.857279	3.734	75	R3		013_6	5.355	5.775	0.927273	3.104	75	R3
018_4	5.547	5.736	0.96705	3.304	76	R3		013_7	4.631	5.39	0.859184	3.449	76	R3
019_1	5.378	4.821	1.11554	2.437	77	R3		013_8	4.631	5.39	0.859184	2.931	77	R3
019_2	6.073	4.57	1.32888	2.961	78	R3		013_9	4.564	6.129	0.744657	5.657	78	R3
019_3	6.073	4.57	1.32888	3.302	79	R3		013_10	4.564	6.129	0.744657	3.419	79	R3
019_4	4.965	4.846	1.02456	2.713	80	R3		013_11	5.213	5.875	0.887319	3.853	80	R3
019_5	4.965	4.846	1.02456	3.251	81	R3		013_12	5.213	5.875	0.887319	2.919	81	R3
020_1	4.509	4.745	0.950263	2.803	82	R3		013_13	4.824	5.654	0.853201	3.779	82	R3
020_2	4.509	4.745	0.950263	3.04	83	R3		013_14	4.375	5.975	0.732218	4.359	83	R3
020_3	5.278	4.536	1.16358	3.541	84	R3		013_15	4.375	5.975	0.732218	2.932	84	R3
020_4	5.278	4.536	1.16358	3.646	85	R3		014_1	5	6.161	0.811557	4.331	85	R3
020_5	5.203	4.774	1.08986	2.585	86	R3		014_2	6.426	5.479	1.17284	4.014	86	R3
020_6	4.662	4.891	0.953179	2.475	87	R3		014_3	5.143	7.456	0.68978	6.094	87	R3
020_7	4.662	4.891	0.953179	4.225	88	R3		014_4	5.143	7.456	0.68978	2.527	88	R3
021_1	4.82	5.421	0.889135	3.564	89	R3		014_5	5.094	6.811	0.747908	3.554	89	R3
021_2	4.82	5.421	0.889135	3.644	90	R3		014_6	5.094	6.811	0.747908	5.169	90	R3
021_3	4.335	5.861	0.739635	3.002	91	R3		014_7	5.12	7.058	0.725418	2.91	91	R3
021_4	3.895	6.734	0.578408	2.981	92	R3		015_1	6.451	6.043	1.06752	3.303	92	R3
021_5	3.895	6.734	0.578408	3.622	93	R3		015_2	6.451	6.043	1.06752	3.85	93	R3
021_6	4.991	6.203	0.804611	2.885	94	R3		015_3	4.261	6.364	0.669547	3.363	94	R3
021_7	4.991	6.203	0.804611	5.946	95	R3		015_4	4.261	6.364	0.669547	3.676	95	R3
022_1	6.438	5.271	1.2214	2.879	96	R3		016_1	4.965	5.351	0.927864	3.375	96	R3
022_2	5.64	5.458	1.03335	3.172	97	R3		016_2	4.965	5.351	0.927864	5.012	97	R3
022_3	5.64	5.458	1.03335	4.479	98	R3		016_3	5.797	5.757	1.00695	3.321	98	R3
022_4	5.811	5.54	1.04892	3.971	99	R3		016_4	5.797	5.757	1.00695	3.959	99	R3
022_5	5.811	5.54	1.04892	3.579	100	R3		016_5	6.349	5.411	1.17335	3.269	100	R3
001_1	6.165	4.99	1.23547	3.166	101	R4		017_1	5.321	5.322	0.999812	3.033	101	R3
001_2	4.404	5.776	0.762465	3.262	102	R4		017_2	5.321	5.322	0.999812	3.299	102	R3
001_3	4.404	5.776	0.762465	3.203	103	R4		017_3	5.029	5.299	0.949047	4.754	103	R3
001_4	5.276	5.336	0.988756	2.525	104	R4		017_4	5.029	5.299	0.949047	3.907	104	R3
001_5	5.276	5.336	0.988756	3.577	105	R4		017_5	5.353	6.05	0.884793	4.875	105	R3
001_6	5.909	5.237	1.12832	2.964	106	R4		017_6	5.353	6.05	0.884793	3.73	106	R3
001_7	6.193	4.842	1.27902	2.841	107	R4		017_7	6.043	5.233	1.15479	3.473	107	R3
001_8	6.193	4.842	1.27902	4.372	108	R4		018_1	5.838	5.191	1.12464	4.719	108	R3
001_9	5.729	5.817	0.984872	2.641	109	R4		018_2	5.321	5.847	0.910039	4.536	109	R3
001_10	5.729	5.817	0.984872	3.629	110	R4		018_3	4.665	5.616	0.830662	3.815	110	R3
003_1	5.254	5.276	0.99583	3.461	111	R4		018_4	3.941	6.08	0.648191	4.979	111	R3
003_2	5.254	5.276	0.99583	3.556	112	R4		018_5	4.823	6.02	0.801163	3.887	112	R3
003_3	5.877	5.186	1.13324	3.271	113	R4		018_6	4.951	5.471	0.904953	4.39	113	R3
003_4	4.841	6.433	0.752526	3.991	114	R4		001_1	5.952	5.654	1.05271	4.662	114	R4
003_5	4.841	6.433	0.752526	3.844	115	R4		001_2	5.06	5.388	0.939124	4.053	115	R4
006_1	6.178	4.983	1.23981	2.841	116	R4		001_3	5.06	5.388	0.939124	3.254	116	R4
006_2	5.209	4.848	1.07446	3.712	117	R4		001_4	4.714	5.435	0.867341	4.06	117	R4
006_3	3.656	5.745	0.636379	3.898	118	R4		001_5	4.714	5.435	0.867341	3.183	118	R4
006_4	4.976	5.006	0.994007	3.146	119	R4		002_1	6.888	4.6	1.49739	4.067	119	R4
006_5	4.976	5.006	0.994007	3.435	120	R4		002_2	6.624	4.462	1.48454	3.288	120	R4
007_1	5.324	5.099	1.04413	4.825	121	R4		002_3	6.418	5.413	1.18566	3.82	121	R4
007_2	5.399	4.984	1.08327	3.425	122	R4		002_4	6.418	5.413	1.18566	2.232	122	R4
007_3	5.399	4.984	1.08327	3.107	123	R4		002_5	4.816	6.097	0.789897	2.422	123	R4
007_4	4.273	5.282	0.808974	3.183	124	R4		002_6	4.816	6.097	0.789897	2.903	124	R4
007_5	4.961	4.87	1.01869	3.728	125	R4		003_1	4.975	5.792	0.858943	3.913	125	R4
007_6	4.901	5.156	0.950543	3.853	126	R4		003_2	4.975	5.792	0.858943	4.184	126	R4
007_7	4.901	5.156	0.950543	3.096	127	R4		003_3	4.524	6.253	0.723493	2.385	127	R4
009_1	4.663	4.961	0.939931	4.221	128	R4		003_4	4.524	6.253	0.723493	4.106	128	R4
009_2	4.923	5.72	0.860664	3.713	129	R4		003_5	4.6	6.888	0.667828	4.594	129	R4
009_3	3.923	5.727	0.685001	2.86	130	R4		003_6	4.6	6.888	0.667828	3.726	130	R4
010_1	4.721	5.803	0.813545	2.867	131	R4		005_1	5.823	5.236	1.11211	3.637	131	R4
010_2	6.149	5.683	1.082	3.134	132	R4		005_2	6.479	5.507	1.1765	3.516	132	R4
010_3	6.149	5.683	1.082	3.69	133	R4		005_3	5.892	5.688	1.03587	2.301	133	R4
010_4	5.532	5.336	1.03673	2.248	134	R4		005_4	5.892	5.688	1.03587	2.621	134	R4
010_5	5.532	5.336	1.03673	2.662	135	R4		005_5	5.597	5.779	0.968507	2.855	135	R4
010_6	5.569	5.592	0.995887	2.603	136	R4		005_6	5.567	5.477	1.01643	2.522	136	R4
010_7	5.569	5.592	0.995887	3.015	137	R4		005_7	5.567	5.477	1.01643	2.623	137	R4
012_1	5.115	5.101	1.00274	3.384	138	R4		006_1	6.594	5.555	1.18704	2.505	138	R4
012_2	4.705	5.757	0.817266	2.981	139	R4		006_2	6.758	4.711	1.43451	4.019	139	R4
012_3	4.639	5.455	0.850412	4.233	140	R4		007_1	6.861	5.841	1.17463	3.054	140	R4
012_4	3.97	5.713	0.694906	3.393	141	R4		007_2	5.978	5.368	1.11364	4.797	141	R4
012_5	5.165	5.614	0.920021	3.172	142	R4		007_3	5.952	6.563	0.906902	2.818	142	R4
012_6	5.479	5.345	1.02507	3.047	143	R4		007_4	7.035	5.862	1.2001	3.167	143	R4
013_1	5.795	6.02	0.962625	3.046	144	R4		007_5	7.035	5.862	1.2001	4.993	144	R4
013_2	5.389	5.795	0.92994	3.338	145	R4		007_6	6.043	5.773	1.04677	3.91	145	R4
013_3	3.955	5.922	0.667849	4.136	146	R4		008_1	6.405	5.772	1.10967	3.082	146	R4
013_4	4.938	5.438	0.908054	4.42	147	R4		008_2	5.652	5.953	0.949437	3.027	147	R4
014_1	4.483	5.796	0.773464	3.118	148	R4		008_3	5.862	6.291	0.931807	3.236	148	R4
014_2	4.483	5.796	0.773464	3.046	149	R4		008_4	5.862	6.291	0.931807	2.338	149	R4
014_3	3.892	6.149	0.632948	4.064	150	R4		008_5	5.796	6.449	0.898744	3.266	150	R4
014_4	4.962	5.367	0.924539	3.55	151	R4		008_6	7.057	5.975	1.18109	3.033	151	R4
014_5	4.944	5.381	0.918788	3.196	152	R4		009_1	6.734	5.925	1.13654	3.103	152	R4
014_6	4.944	5.381	0.918788	4.197	153	R4		009_2	5.909	5.938	0.995116	2.795	153	R4
015_1	6.491	4.899	1.32496	2.539	154	R4		009_3	5.396	5.805	0.929543	3.577	154	R4
015_2	5.745	4.301	1.33574	3.207	155	R4		009_4	5.396	5.805	0.929543	3.836	155	R4
015_3	5.697	5.115	1.11378	2.553	156	R4		009_5	4.721	6.373	0.740781	4.953	156	R4
015_4	5.697	5.115	1.11378	3.342	157	R4		009_6	4.721	6.373	0.740781	3.831	157	R4
015_5	6.403	5.097	1.25623	3.332	158	R4		009_7	5.247	6.388	0.821384	4.221	158	R4
016_1	5.618	5.486	1.02406	3.83	159	R4		009_8	5.247	6.388	0.821384	2.988	159	R4
016_2	6.53	5.135	1.27167	3.014	160	R4		009_9	5.592	5.983	0.934648	3.222	160	R4
016_3	5.079	5.353	0.948814	3.833	161	R4		009_10	5.592	5.983	0.934648	3.473	161	R4
016_4	5.079	5.353	0.948814	3.104	162	R4		009_11	6.043	5.682	1.06353	4.187	162	R4
016_5	5.549	5.526	1.00416	2.497	163	R4		009_12	6.043	5.682	1.06353	2.684	163	R4
016_6	4.741	5.722	0.828556	3.683	164	R4		009_13	6.194	6.51	0.951459	3.549	164	R4
016_7	4.741	5.722	0.828556	4.149	165	R4		009_14	6.194	6.51	0.951459	2.987	165	R4
016_8	5.915	5.215	1.13423	3.496	166	R4		010_1	7.215	5.208	1.38537	2.472	166	R4
017_1	5.216	6.328	0.824273	5.131	167	R4		010_2	6.374	5.307	1.20105	3.188	167	R4
017_2	5.216	6.328	0.824273	3.877	168	R4		010_3	7.306	4.577	1.59624	4.015	168	R4
017_3	4.435	6.209	0.714286	5.569	169	R4		010_4	5.216	5.682	0.917987	2.532	169	R4
017_4	4.435	6.209	0.714286	3.609	170	R4		010_5	5.216	5.682	0.917987	3.38	170	R4
017_5	5.298	6.378	0.830668	3.069	171	R4		010_6	5.524	5.772	0.957034	2.509	171	R4
017_6	5.298	6.378	0.830668	3.873	172	R4		010_7	6.478	5.426	1.19388	5.268	172	R4
018_1	5.026	5.82	0.863574	2.864	173	R4		011_1	6.877	5.547	1.23977	4.159	173	R4
018_2	5.039	5.503	0.915682	4.548	174	R4		011_2	6.744	4.939	1.36546	2.658	174	R4
018_3	5.039	5.503	0.915682	3.738	175	R4		011_3	6.744	4.939	1.36546	3.37	175	R4
018_4	4.6	6.12	0.751634	4.348	176	R4		011_4	5.458	5.818	0.938123	3.091	176	R4
018_5	4.6	6.12	0.751634	3.296	177	R4		011_5	5.659	6.521	0.867812	3.172	177	R4
018_6	5.006	5.592	0.895207	3.279	178	R4		012_1	6.554	5.652	1.15959	3.882	178	R4
018_7	5.435	6.066	0.895978	2.73	179	R4		012_2	5.456	6.651	0.820328	5.431	179	R4
019_1	6.022	5.077	1.18613	3.427	180	R4		012_3	5.456	6.651	0.820328	3.459	180	R4
019_2	6.022	5.077	1.18613	3.087	181	R4		012_4	6.223	5.887	1.05707	3.186	181	R4
019_3	4.343	5.787	0.750475	3.564	182	R4		012_5	6.223	5.887	1.05707	3.745	182	R4
019_4	4.343	5.787	0.750475	3.534	183	R4		012_6	6.291	5.728	1.09829	4.137	183	R4
019_5	4.239	5.519	0.768074	3.371	184	R4		012_7	6.291	5.728	1.09829	3.765	184	R4
019_6	4.239	5.519	0.768074	2.593	185	R4		012_8	4.48	6.734	0.665281	2.532	185	R4
020_1	4.972	5	0.9944	3.105	186	R4		012_9	4.48	6.734	0.665281	4.175	186	R4
020_2	4.972	5	0.9944	3.886	187	R4		013_1	8.051	5.302	1.51848	3.067	187	R4
020_3	4.647	5.281	0.879947	3.518	188	R4		013_2	7.125	5.457	1.30566	3.281	188	R4
020_4	4.539	4.99	0.909619	3.095	189	R4		013_3	6.584	5.344	1.23204	2.878	189	R4
020_5	5.442	5.261	1.0344	3.033	190	R4		014_1	5.547	5.727	0.96857	2.766	190	R4
022_1	5.772	4.872	1.18473	3.605	191	R4		014_2	5.367	6.674	0.804165	3.236	191	R4
022_2	5.772	4.872	1.18473	2.932	192	R4		014_3	5.637	6.426	0.877218	4.2	192	R4
022_3	6.226	4.735	1.31489	2.302	193	R4		014_4	5.637	6.426	0.877218	6.143	193	R4
022_4	6.226	4.735	1.31489	5.508	194	R4		014_5	5.513	6.536	0.843482	3.3	194	R4
022_5	5.031	5.392	0.933049	2.892	195	R4		014_6	5.513	6.536	0.843482	4.06	195	R4
022_6	5.031	5.392	0.933049	3.491	196	R4		015_1	6.742	5.254	1.28321	2.779	196	R4
024_1	5.097	6.094	0.836396	3.425	197	R4		015_2	4.983	6.246	0.797791	3.74	197	R4
024_2	5.097	6.094	0.836396	3.636	198	R4		015_3	4.983	6.246	0.797791	4.065	198	R4
024_3	5.909	6.427	0.919403	4.099	199	R4		015_4	6.764	5.073	1.33333	2.623	199	R4
024_4	4.42	6.469	0.683259	3.097	200	R4		015_5	5.847	6.149	0.950886	5.419	200	R4
024_5	4.361	6.376	0.683971	3.399	201	R4		016_1	6.387	5.638	1.13285	2.715	201	R4
024_6	4.361	6.376	0.683971	3.61	202	R4		016_2	6.118	5.622	1.08822	3.092	202	R4
024_7	5.366	5.886	0.911655	2.934	203	R4		016_3	6.118	5.622	1.08822	4.865	203	R4
025_1	5.977	5.842	1.02311	4.016	204	R4		016_4	4.81	5.923	0.812088	2.789	204	R4
025_2	5.977	5.842	1.02311	3.366	205	R4		016_5	4.81	5.923	0.812088	3.095	205	R4
026_1	5.909	5.164	1.14427	2.582	206	R4		016_6	5.171	5.772	0.895877	3.09	206	R4
026_2	5.909	5.164	1.14427	3.443	207	R4		016_7	5.171	5.772	0.895877	3.646	207	R4
026_3	4.649	5.801	0.801414	2.345	208	R4		016_8	5.624	5.788	0.971666	3.055	208	R4
026_4	4.649	5.801	0.801414	2.736	209	R4		016_9	5.833	5.156	1.1313	3.089	209	R4
026_5	5.617	4.578	1.22696	3.023	210	R4		017_1	6.293	5.614	1.12095	2.766	210	R4
026_6	4.9	4.376	1.11974	2.925	211	R4		017_2	6.313	5.614	1.12451	3.069	211	R4
027_1	4.891	5.83	0.838937	2.459	212	R4		017_3	6.313	5.614	1.12451	4.786	212	R4
027_2	4.891	5.83	0.838937	3.383	213	R4		017_4	4.539	5.878	0.772201	2.856	213	R4
028_1	6.116	5.443	1.12365	4.864	214	R4		017_5	4.539	5.878	0.772201	3.737	214	R4
028_2	6.116	5.443	1.12365	3.157	215	R4		018_1	5.84	5.321	1.09754	2.831	215	R4
028_3	5.306	5.879	0.902534	4.089	216	R4		018_2	5.713	4.647	1.2294	4.551	216	R4
028_4	5.306	5.879	0.902534	2.823	217	R4		018_3	5.217	5.336	0.977699	2.451	217	R4
030_1	5.656	5.577	1.01416	2.51	218	R4		018_4	5.217	5.336	0.977699	3.842	218	R4
030_2	4.668	5.817	0.802476	3.328	219	R4		018_5	6.629	5.073	1.30672	3.574	219	R4
030_3	4.668	5.817	0.802476	3.599	220	R4		018_6	6.629	5.073	1.30672	5.294	220	R4
030_4	4.374	5.757	0.759771	2.363	221	R4		018_7	6.088	6.155	0.989115	4.066	221	R4
030_5	4.374	5.757	0.759771	3.127	222	R4		018_8	6.088	6.155	0.989115	3.189	222	R4
030_6	4.691	4.901	0.957152	3.958	223	R4		019_1	3.819	5.306	0.719751	3.077	223	R4
031_1	5.001	6.006	0.832667	4.29	224	R4		019_2	3.819	5.306	0.719751	2.963	224	R4
031_2	5.344	6.833	0.782087	5.213	225	R4		019_3	5.096	5.276	0.965883	3.166	225	R4
031_3	5.935	6.365	0.932443	3.83	226	R4		019_4	4.585	5.005	0.916084	3.519	226	R4
031_4	5.935	6.365	0.932443	3.828	227	R4		020_1	5.877	6.78	0.866814	2.952	227	R4
031_5	6.773	6.03	1.12322	5.352	228	R4		020_2	5.877	6.78	0.866814	6.659	228	R4
031_6	6.773	6.03	1.12322	3.672	229	R4		020_3	5.547	6.805	0.815136	4.229	229	R4
032_1	5.523	5.236	1.05481	3.613	230	R4		020_4	5.547	6.805	0.815136	3.23	230	R4
032_2	5.757	6.379	0.902493	3.17	231	R4		020_5	5.501	6.404	0.858994	3.08	231	R4
032_3	5.757	6.379	0.902493	4.794	232	R4		020_6	5.501	6.404	0.858994	2.81	232	R4
032_4	5.319	7.48	0.711096	2.872	233	R4		020_7	5.755	6.034	0.953762	3.396	233	R4
032_5	5.319	7.48	0.711096	2.917	234	R4		020_8	5.755	6.034	0.953762	3.104	234	R4
032_6	5.204	6.243	0.833574	3.477	235	R4		020_9	5.744	6.054	0.948794	5.009	235	R4
032_7	5.204	6.243	0.833574	4.198	236	R4		021_1	5.051	6.2	0.814677	3.879	236	R4
033_1	5.696	5.638	1.01029	3.282	237	R4		021_2	4.359	7.05	0.618298	3.545	237	R4
033_2	5.96	5.596	1.06505	2.968	238	R4		021_3	4.359	7.05	0.618298	4.78	238	R4
033_3	5.96	5.596	1.06505	3.779	239	R4		021_4	4.434	6.615	0.670295	3.954	239	R4
033_4	4.736	6.005	0.788676	3.271	240	R4		021_5	4.434	6.615	0.670295	4.946	240	R4
033_5	4.736	6.005	0.788676	3.817	241	R4		021_6	4.667	6.585	0.708732	3.579	241	R4
033_6	3.974	6.497	0.611667	2.755	242	R4		021_7	4.667	6.585	0.708732	3.68	242	R4
033_7	3.974	6.497	0.611667	3.529	243	R4		021_8	4.447	5.976	0.744143	4.024	243	R4
033_8	5.247	5.369	0.977277	5.293	244	R4		021_9	4.447	5.976	0.744143	3.469	244	R4
033_9	5.247	5.369	0.977277	3.677	245	R4		021_10	4.589	5.934	0.77334	4.949	245	R4
034_1	6.039	5.635	1.0717	3.3	246	R4		021_11	4.589	5.934	0.77334	2.724	246	R4
035_1	5.111	5.547	0.921399	2.727	247	R4		021_12	4.449	6.074	0.732466	4.804	247	R4
035_2	4.807	5.843	0.822694	3.361	248	R4		021_13	4.449	6.074	0.732466	3.642	248	R4
035_3	6.321	5.29	1.1949	3.171	249	R4		021_14	5.473	5.969	0.916904	3.136	249	R4
035_4	5.326	5.525	0.963982	3.095	250	R4		022_1	6.403	5.411	1.18333	3.572	250	R4
036_1	6.065	5.93	1.02277	2.861	251	R4		022_2	5.667	5.367	1.0559	3.779	251	R4
036_2	5.212	5.788	0.900484	3.289	252	R4		022_3	5.172	6.827	0.75758	2.633	252	R4
036_3	5.872	6.547	0.896899	2.752	253	R4		023_1	6.246	5.659	1.10373	3.052	253	R4
036_4	5.872	6.547	0.896899	2.995	254	R4		023_2	5.984	5.802	1.03137	3.691	254	R4
036_5	5.75	5.412	1.06245	3.345	255	R4		023_3	5.984	5.802	1.03137	5.248	255	R4
036_6	5.75	5.412	1.06245	2.762	256	R4		023_4	4.975	6.058	0.821228	3.902	256	R4
036_7	5.663	5.255	1.07764	3.362	257	R4		023_5	4.975	6.058	0.821228	4.107	257	R4
036_8	5.663	5.255	1.07764	3.278	258	R4		023_6	5.622	5.835	0.963496	3.1	258	R4
037_1	6.08	5.11	1.18982	3.055	259	R4		024_1	7.599	5.638	1.34782	5.532	259	R4
037_2	5.368	5.668	0.947071	6.116	260	R4		024_2	5.441	5.727	0.950061	3.774	260	R4
037_3	5.434	5.998	0.905969	3.277	261	R4		024_3	5.441	5.727	0.950061	3.396	261	R4
037_4	5.434	5.998	0.905969	3.811	262	R4		024_4	5.533	5.712	0.968662	3.861	262	R4
037_5	4.826	5.592	0.863019	3.622	263	R4		024_5	5.533	5.712	0.968662	3.945	263	R4
037_6	4.826	5.592	0.863019	3.976	264	R4		024_6	4.78	6.224	0.767995	3.94	264	R4
037_7	5.491	6.04	0.909106	3.913	265	R4		024_7	4.78	6.224	0.767995	4.088	265	R4
037_8	5.491	6.04	0.909106	3.331	266	R4		024_8	7.193	6.201	1.15997	3.476	266	R4
037_9	4.54	6.347	0.715299	3.549	267	R4		024_9	5.171	6.014	0.859827	3.989	267	R4
037_10	4.54	6.347	0.715299	3.852	268	R4		024_10	5.171	6.014	0.859827	3.729	268	R4
038_1	5.891	6.746	0.873258	3.09	269	R4		024_11	4.164	5.727	0.727082	3.856	269	R4
038_2	4.421	6.825	0.647766	3.54	270	R4		025_1	6.629	6.178	1.073	4.921	270	R4
038_3	4.421	6.825	0.647766	3.17	271	R4		025_2	6.629	6.178	1.073	3.863	271	R4
038_4	5.759	5.82	0.989519	3.296	272	R4		025_3	5.795	5.75	1.00783	3.387	272	R4
038_5	5.759	5.82	0.989519	4.437	273	R4		025_4	5.795	5.75	1.00783	3.022	273	R4
038_6	6.165	5.835	1.05655	3.344	274	R4		025_5	5.772	5.655	1.02069	2.86	274	R4
038_7	6.165	5.835	1.05655	2.806	275	R4		025_6	6.629	5.141	1.28944	4.009	275	R4
038_8	4.098	6.3	0.650476	3.374	276	R4		025_7	6.629	5.141	1.28944	3.843	276	R4
038_9	5.188	5.982	0.867268	3.342	277	R4		025_8	6.005	6.53	0.919602	4.769	277	R4
039_1	5.937	4.735	1.25385	2.71	278	R4		025_9	6.005	6.53	0.919602	4.344	278	R4
039_2	4.284	5.166	0.829268	3.722	279	R4		026_1	6.606	5.592	1.18133	3.484	279	R4
039_3	4.284	5.166	0.829268	2.836	280	R4		026_2	7.08	5.291	1.33812	3.128	280	R4
039_4	4.645	5.389	0.861941	3.183	281	R4		026_3	6.209	5.802	1.07015	3.111	281	R4
039_5	4.645	5.389	0.861941	4.775	282	R4		026_4	6.209	5.802	1.07015	3.418	282	R4
039_6	6.562	5.052	1.29889	3.156	283	R4		027_1	7.17	5.728	1.25175	4.223	283	R4
039_7	6.562	5.052	1.29889	3.085	284	R4		027_2	7.17	5.728	1.25175	3.397	284	R4
039_8	4.595	5.835	0.787489	3.591	285	R4		027_3	7.02	5.833	1.2035	2.958	285	R4
039_9	4.595	5.835	0.787489	4.596	286	R4		027_4	7.02	5.833	1.2035	2.346	286	R4
040_1	5.141	5.141	1	3.055	287	R4		027_5	6.358	5.208	1.22081	5.334	287	R4
040_2	5.067	5.831	0.868976	3.159	288	R4		028_1	5.231	5.456	0.958761	3.541	288	R4
040_3	5.809	5.458	1.06431	3.715	289	R4		028_2	5.953	5.818	1.0232	4.666	289	R4
040_4	5.809	5.458	1.06431	2.893	290	R4		028_3	5.953	5.818	1.0232	4.185	290	R4
040_5	5.206	4.285	1.21494	3	291	R4		028_4	5.847	6.223	0.939579	2.774	291	R4
040_6	5.206	4.285	1.21494	2.916	292	R4		028_5	5.547	6.013	0.922501	3.007	292	R4
041_1	5.704	5.074	1.12416	3.432	293	R4		028_6	5.547	6.013	0.922501	3.96	293	R4
041_2	4.435	5.744	0.77211	3.631	294	R4		028_7	6.179	5.751	1.07442	3.941	294	R4
041_3	4.376	5.863	0.746376	2.592	295	R4		028_8	6.477	5.817	1.11346	3.664	295	R4
042_1	4.833	5.401	0.894834	3.025	296	R4		028_9	6.209	6.647	0.934106	5.159	296	R4
042_2	4.436	5.805	0.764169	3.497	297	R4		028_10	6.209	6.647	0.934106	3.131	297	R4
042_3	4.436	5.805	0.764169	4.625	298	R4		028_11	6.103	5.938	1.02779	5.602	298	R4
042_4	4.081	5.592	0.729793	3.844	299	R4		028_12	6.103	5.938	1.02779	4.261	299	R4
042_5	4.081	5.592	0.729793	2.928	300	R4		028_13	5.066	6.584	0.769441	4.073	300	R4
043_1	6.36	4.808	1.32279	3.555	301	R4		028_14	5.457	6.062	0.900198	2.571	301	R4
043_2	5.547	5.233	1.06	3.202	302	R4		028_15	5.457	6.062	0.900198	3.603	302	R4
043_3	5.547	5.233	1.06	2.777	303	R4		028_16	6.404	5.817	1.10091	3.286	303	R4
043_4	5.12	5.939	0.862098	3.82	304	R4		029_1	6.568	5.952	1.10349	3.684	304	R4
043_5	5.504	5.532	0.994939	3.635	305	R4		029_2	6.653	5.411	1.22953	3.015	305	R4
043_6	4.475	5.497	0.81408	2.728	306	R4		029_3	6.653	5.411	1.22953	3.25	306	R4
043_7	5.575	4.563	1.22178	3.705	307	R4		029_4	5.892	5.967	0.987431	4.451	307	R4
044_1	4.02	5.557	0.723412	2.693	308	R4		029_5	5.892	5.967	0.987431	3.237	308	R4
044_2	4.02	5.557	0.723412	4.479	309	R4		029_6	5.201	6.238	0.833761	3.753	309	R4
044_3	4.662	5.386	0.865577	3.547	310	R4		029_7	5.201	6.238	0.833761	3.342	310	R4
044_4	4.662	5.386	0.865577	3.537	311	R4		029_8	6.855	5.231	1.31046	4.369	311	R4
044_5	5.036	5.037	0.999801	3.394	312	R4		030_1	4.945	5.562	0.889069	4.62	312	R4
044_6	5.036	5.037	0.999801	3.194	313	R4		030_2	4.51	5.75	0.784348	2.845	313	R4
044_7	4.619	5.66	0.816078	3.622	314	R4		030_3	5.186	5.457	0.950339	3.458	314	R4
044_8	4.619	5.66	0.816078	2.803	315	R4		030_4	5.479	5.797	0.945144	3.184	315	R4
046_1	5.413	5.835	0.927678	2.828	316	R4		030_5	5.306	5.774	0.918947	3.227	316	R4
046_2	5.413	5.835	0.927678	3.282	317	R4		030_6	5.306	5.774	0.918947	3.138	317	R4
046_3	4.491	5.148	0.872378	3.693	318	R4		031_1	5.434	6.247	0.869858	3.052	318	R4
046_4	4.491	5.148	0.872378	3.63	319	R4		031_2	5.434	6.247	0.869858	2.752	319	R4
046_5	4.578	5.48	0.835401	3.294	320	R4		031_3	5.862	5.532	1.05965	4.171	320	R4
046_6	4.578	5.48	0.835401	4.015	321	R4		031_4	5.847	6.013	0.972393	2.825	321	R4
046_7	3.991	5.141	0.776308	4.104	322	R4		031_5	5.847	6.013	0.972393	2.714	322	R4
046_8	3.991	5.141	0.776308	4.135	323	R4		032_1	6.253	5.502	1.1365	3.608	323	R4
01_1	5.904	5.882	1.00374	3.128	324	R5		032_2	5.938	5.231	1.13516	3.399	324	R4
01_2	5.904	5.882	1.00374	3.05	325	R5		032_3	5.938	5.231	1.13516	3.899	325	R4
01_3	5.634	6.491	0.867971	4.226	326	R5		032_4	5.186	5.231	0.991397	3.578	326	R4
01_4	5.634	6.491	0.867971	3.413	327	R5		032_5	5.186	5.231	0.991397	4.371	327	R4
02_1	5.955	6.226	0.956473	2.799	328	R5		032_6	5.73	6.078	0.942744	3.645	328	R4
02_2	5.955	6.226	0.956473	2.256	329	R5		032_7	5.984	5.4	1.10815	3.415	329	R4
02_3	4.618	6.197	0.745199	2.389	330	R5		032_8	5.984	5.4	1.10815	3.66	330	R4
02_4	4.618	6.197	0.745199	3.734	331	R5		033_1	5.366	6.043	0.88797	3.059	331	R4
02_5	5.912	5.528	1.06947	2.714	332	R5		033_2	7.125	6.202	1.14882	3.61	332	R4
03_1	5.377	5.243	1.02556	2.883	333	R5		033_3	6.315	5.622	1.12327	3.006	333	R4
03_2	4.695	5.474	0.857691	3.295	334	R5		034_1	6.065	6.178	0.981709	4.422	334	R4
03_3	4.695	5.474	0.857691	5.132	335	R5		034_2	5.487	6.839	0.80231	3.162	335	R4
03_4	5.129	5.925	0.865654	2.341	336	R5		034_3	5.487	6.839	0.80231	3.996	336	R4
03_5	5.129	5.925	0.865654	2.757	337	R5		034_4	5.534	6.6	0.838485	3.904	337	R4
03_6	4.364	5.399	0.808298	3.643	338	R5		034_5	5.534	6.6	0.838485	5.028	338	R4
03_7	4.364	5.399	0.808298	3.018	339	R5		034_6	6.103	6.914	0.882702	2.792	339	R4
03_8	5.129	6.119	0.838209	2.895	340	R5		034_7	6.103	6.914	0.882702	4.574	340	R4
03_9	5.129	6.119	0.838209	2.807	341	R5		034_8	5.457	6.27	0.870335	3.435	341	R4
03_10	3.945	5.204	0.758071	3.154	342	R5		034_9	6.743	6.426	1.04933	4.48	342	R4
03_11	3.945	5.204	0.758071	4.021	343	R5		034_10	6.743	6.426	1.04933	4.063	343	R4
04_1	5.825	5.012	1.16221	2.396	344	R5		034_11	5.44	6.326	0.859943	4.198	344	R4
04_2	5.176	5.838	0.886605	3.327	345	R5		035_1	7.125	5.975	1.19247	2.286	345	R4
04_3	5.176	5.838	0.886605	3.346	346	R5		035_2	5.911	6.134	0.963645	2.876	346	R4
04_4	5.281	5.086	1.03834	3.5	347	R5		035_3	5.911	6.134	0.963645	3.886	347	R4
04_5	5.147	5.478	0.939576	2.769	348	R5		035_4	6.404	5.729	1.11782	3.157	348	R4
04_6	5.147	5.478	0.939576	3.46	349	R5		036_1	5.199	5.887	0.883132	3.139	349	R4
04_7	5.078	6.411	0.792076	2.642	350	R5		036_2	6.204	5.679	1.09245	3.023	350	R4
04_8	5.078	6.411	0.792076	2.886	351	R5		036_3	6.204	5.679	1.09245	3.39	351	R4
04_9	5.342	5.463	0.977851	2.777	352	R5		036_4	5.449	6.103	0.89284	3.215	352	R4
04_10	5.342	5.463	0.977851	2.577	353	R5		036_5	5.449	6.103	0.89284	3.753	353	R4
04_11	5.442	5.056	1.07635	2.902	354	R5		036_6	5.597	6.62	0.845468	5.016	354	R4
04_12	4.8	5.221	0.919364	3.519	355	R5		036_7	5.597	6.62	0.845468	4.178	355	R4
05_1	6.298	4.31	1.46125	2.652	356	R5		036_8	4.745	6.308	0.752219	2.99	356	R4
05_2	5.692	5.134	1.10869	2.93	357	R5		036_9	4.745	6.308	0.752219	3.409	357	R4
05_3	5.692	5.134	1.10869	2.531	358	R5		037_1	5.447	6.117	0.890469	4.489	358	R4
05_4	5.558	5.076	1.09496	3.301	359	R5		037_2	5.427	6.057	0.895988	3.596	359	R4
05_5	5.558	5.076	1.09496	3.401	360	R5		037_3	5.427	6.057	0.895988	3.6	360	R4
05_6	5.483	5.077	1.07997	2.417	361	R5		037_4	5.201	6.065	0.857543	3.821	361	R4
05_7	5.483	5.077	1.07997	3.528	362	R5		038_1	6.034	5.767	1.0463	3.713	362	R4
05_8	6.301	5.309	1.18685	2.996	363	R5		038_2	6.328	5.693	1.11154	3.135	363	R4
05_9	5.438	4.821	1.12798	3.246	364	R5		038_3	6.204	4.927	1.25918	2.886	364	R4
05_10	5.438	4.821	1.12798	3.634	365	R5		038_4	5.045	5.707	0.884002	3.052	365	R4
05_11	5.24	4.984	1.05136	3.505	366	R5		039_1	5.836	4.871	1.19811	3.262	366	R4
05_12	4.505	5.423	0.830721	3.282	367	R5		039_2	6.073	5.486	1.107	2.691	367	R4
06_1	5.123	4.866	1.05282	2.988	368	R5		039_3	6.073	5.486	1.107	3.085	368	R4
06_2	5.429	5.181	1.04787	2.441	369	R5		039_4	6.464	5.326	1.21367	1.827	369	R4
07_1	5.926	4.16	1.42452	2.623	370	R5		039_5	6.464	5.326	1.21367	3.1	370	R4
07_2	5.109	5.103	1.00118	2.769	371	R5		039_6	6.494	4.96	1.30927	4.082	371	R4
07_3	5.109	5.103	1.00118	2.319	372	R5		039_7	5.411	5.396	1.00278	2.719	372	R4
07_4	4.592	4.954	0.926928	2.576	373	R5		039_8	5.58	4.872	1.14532	2.874	373	R4
07_5	4.743	5.308	0.893557	2.688	374	R5		039_9	5.58	4.872	1.14532	3.681	374	R4
07_6	5.877	4.451	1.32038	2.97	375	R5		040_1	5.28	4.648	1.13597	2.618	375	R4
07_7	5.877	4.451	1.32038	2.839	376	R5		040_2	5.306	5.217	1.01706	3.12	376	R4
08_1	6.03	4.277	1.40987	2.41	377	R5		040_3	5.306	5.217	1.01706	3.779	377	R4
09_1	5.695	4.685	1.21558	2.718	378	R5		040_4	5.727	4.645	1.23294	3.892	378	R4
09_2	5.257	5.067	1.0375	3.639	379	R5		040_5	5.727	4.645	1.23294	2.744	379	R4
09_3	5.257	5.067	1.0375	2.954	380	R5		040_6	4.54	4.691	0.967811	3.975	380	R4
09_4	5.802	4.683	1.23895	2.58	381	R5		040_7	4.54	4.691	0.967811	3.255	381	R4
09_5	5.802	4.683	1.23895	2.35	382	R5		040_8	4.571	4.841	0.944226	2.445	382	R4
09_6	4.877	5.263	0.926658	3.937	383	R5		040_9	3.654	5.712	0.639706	2.933	383	R4
09_7	4.877	5.263	0.926658	3.074	384	R5		041_1	5.65	5.139	1.09944	2.41	384	R4
09_8	6.27	4.717	1.32923	3.052	385	R5		041_2	6.892	4.878	1.41287	2.2	385	R4
12_1	6.07	5.686	1.06753	3.119	386	R5		041_3	6.373	5.667	1.12458	2.904	386	R4
12_2	4.694	5.777	0.812532	2.348	387	R5		041_4	7.147	6.02	1.18721	4.822	387	R4
12_3	4.694	5.777	0.812532	2.666	388	R5		041_5	7.147	6.02	1.18721	3.423	388	R4
12_4	5.297	5.731	0.924272	2.557	389	R5		01_1	4.615	5.562	0.829738	3.833	389	R5
13_1	6.103	6.217	0.981663	3.818	390	R5		01_2	4.615	5.562	0.829738	3.451	390	R5
13_2	6.248	5.962	1.04797	3.579	391	R5		01_3	4.99	4.902	1.01795	3.605	391	R5
13_3	7.54	5.638	1.33735	2.553	392	R5		01_4	4.99	4.902	1.01795	3.397	392	R5
13_4	6.17	5.741	1.07473	3.288	393	R5		02_1	5.461	5.238	1.04257	3.877	393	R5
14_1	5.359	5.453	0.982762	3.021	394	R5		02_2	5.224	5.704	0.915849	2.662	394	R5
14_2	5.391	5.842	0.9228	3.725	395	R5		02_3	5.224	5.704	0.915849	3.512	395	R5
14_3	5.391	5.842	0.9228	4.231	396	R5		02_4	4.225	5.174	0.816583	3.026	396	R5
14_4	5.91	5.3	1.11509	2.363	397	R5		02_5	4.225	5.174	0.816583	3.534	397	R5
14_5	5.91	5.3	1.11509	3.05	398	R5		02_6	5.397	4.96	1.08811	4.284	398	R5
15_1	6.012	5.022	1.19713	2.287	399	R5		02_7	5.397	4.96	1.08811	3.538	399	R5
15_2	5.329	6.411	0.831228	2.855	400	R5		02_8	5.532	5.622	0.983991	4.14	400	R5
16_1	6.792	5.841	1.16281	2.602	401	R5		02_9	5.276	4.479	1.17794	5.016	401	R5
16_2	6.216	5.45	1.14055	3.752	402	R5		02_10	5.807	5.563	1.04386	2.852	402	R5
17_1	4.737	6.07	0.780395	3.856	403	R5		03_1	4.43	5.723	0.77407	3.69	403	R5
17_2	4.956	6.332	0.782691	2.563	404	R5		03_2	4.43	5.723	0.77407	3.264	404	R5
17_3	4.956	6.332	0.782691	3.419	405	R5		03_3	5.139	5.515	0.931822	3.709	405	R5
17_4	5.931	5.773	1.02737	2.79	406	R5		03_4	5.139	5.515	0.931822	3.094	406	R5
17_5	5.931	5.773	1.02737	2.957	407	R5		03_5	5.638	5.565	1.01312	4.946	407	R5
17_6	5.66	6.201	0.912756	2.324	408	R5		03_6	5.638	5.565	1.01312	2.488	408	R5
17_7	5.66	6.201	0.912756	3.37	409	R5		03_7	6.52	5.329	1.22349	3.182	409	R5
17_8	3.848	6.393	0.601908	2.424	410	R5		03_8	5.832	5.132	1.1364	3.749	410	R5
17_9	4.269	6.66	0.640991	2.273	411	R5		03_9	4.215	6.039	0.697963	3.845	411	R5
17_10	4.983	6.383	0.780667	2.408	412	R5		03_10	4.215	6.039	0.697963	3.74	412	R5
17_11	4.983	6.383	0.780667	3.068	413	R5		03_11	5.125	5.337	0.960277	4.084	413	R5
17_12	6.765	6.405	1.05621	2.909	414	R5		05_1	5.185	5.823	0.890434	3.652	414	R5
18_1	5.955	5.97	0.997487	2.661	415	R5		05_2	4.246	6.326	0.671198	4.033	415	R5
18_2	5.955	5.97	0.997487	2.216	416	R5		05_3	3.727	6.268	0.594608	4.405	416	R5
18_3	6.167	5.565	1.10818	3.472	417	R5		06_1	5.762	5.876	0.980599	2.807	417	R5
19_1	6.246	6.292	0.992689	2.889	418	R5		06_2	5.762	5.876	0.980599	4.977	418	R5
19_2	6.742	6.02	1.11993	2.459	419	R5		06_3	4.539	5.798	0.782856	3.23	419	R5
19_3	5.848	5.652	1.03468	3.132	420	R5		06_4	4.539	5.798	0.782856	4.506	420	R5
19_4	5.622	5.592	1.00537	3.183	421	R5		06_5	3.536	6.056	0.583884	3.989	421	R5
19_5	5.622	5.592	1.00537	2.796	422	R5		06_6	3.536	6.056	0.583884	2.407	422	R5
19_6	5.389	5.682	0.948434	2.91	423	R5		06_7	4.441	5.481	0.810254	3.228	423	R5
20_1	5.299	5.659	0.936385	3.215	424	R5		06_8	4.441	5.481	0.810254	4.842	424	R5
20_2	6.554	5.674	1.15509	2.635	425	R5		06_9	5.123	4.974	1.02996	3.916	425	R5
20_3	6.125	6.034	1.01508	3.048	426	R5		07_1	5.531	5.849	0.945632	2.796	426	R5
20_4	6.622	5.788	1.14409	3.38	427	R5		07_2	5.531	5.849	0.945632	4.734	427	R5
21_1	6.228	5.613	1.10957	2.289	428	R5		07_3	4.565	5.605	0.814451	3.764	428	R5
21_2	6.033	5.057	1.193	3.377	429	R5		07_4	4.565	5.605	0.814451	4.398	429	R5
21_3	4.435	6.551	0.676996	3.636	430	R5		07_5	5.553	5.268	1.0541	3.425	430	R5
21_4	4.435	6.551	0.676996	2.906	431	R5		07_6	5.553	5.268	1.0541	5.659	431	R5
21_5	6.218	5.176	1.20131	2.985	432	R5		07_7	6.434	5.057	1.2723	2.8	432	R5
21_6	5.357	4.902	1.09282	3	433	R5		08_1	6.425	4.982	1.28964	2.499	433	R5
21_7	5.357	4.902	1.09282	2.57	434	R5		08_2	6.425	4.982	1.28964	4.387	434	R5
21_8	5.808	6.117	0.949485	3.688	435	R5		08_3	6.223	4.871	1.27756	3.532	435	R5
21_9	5.03	6.581	0.764322	2.861	436	R5		08_4	6.378	5.104	1.24961	2.889	436	R5
24_1	4.759	5.501	0.865115	3.471	437	R5		08_5	6.378	5.104	1.24961	3.321	437	R5
24_2	4.759	5.501	0.865115	3.319	438	R5		09_1	5.694	5.422	1.05017	2.924	438	R5
24_3	5.378	6.104	0.881062	3.025	439	R5		09_2	5.259	5.592	0.940451	2.499	439	R5
24_4	4.997	5.44	0.918566	3.983	440	R5		09_3	5.556	4.829	1.15055	2.539	440	R5
24_5	4.997	5.44	0.918566	3.635	441	R5		09_4	5.556	4.829	1.15055	2.495	441	R5
24_6	5.866	5.221	1.12354	3.517	442	R5		09_5	4.589	6.236	0.735888	2.89	442	R5
24_7	5.866	5.221	1.12354	2.985	443	R5		09_6	4.589	6.236	0.735888	3.57	443	R5
24_8	4.49	5.528	0.812229	2.763	444	R5		09_7	4.541	5.042	0.900635	4.026	444	R5
24_9	4.49	5.528	0.812229	2.983	445	R5		09_8	4.541	5.042	0.900635	3.205	445	R5
24_10	5.074	4.932	1.02879	2.815	446	R5		09_9	3.96	6.003	0.65967	2.686	446	R5
24_11	5.439	5.748	0.946242	3.015	447	R5		09_10	3.96	6.003	0.65967	3.213	447	R5
24_12	5.439	5.748	0.946242	3.474	448	R5		09_11	3.645	5.619	0.648692	3.482	448	R5
25_1	5.007	4.916	1.01851	2.689	449	R5		09_12	3.645	5.619	0.648692	3.477	449	R5
25_2	5.943	4.756	1.24958	2.728	450	R5		09_13	2.95	6.065	0.486397	3.834	450	R5
25_3	5.414	5.579	0.970425	2.504	451	R5		09_14	4.593	6.044	0.759927	3.24	451	R5
25_4	5.406	5.391	1.00278	2.862	452	R5		09_15	4.068	7.006	0.580645	3.169	452	R5
25_5	5.166	5.634	0.916933	2.464	453	R5		09_16	3.369	5.155	0.65354	3.131	453	R5
25_6	5.166	5.634	0.916933	2.678	454	R5		10_1	5.867	4.76	1.23256	2.434	454	R5
25_7	5.065	5.485	0.923428	3.077	455	R5		10_2	5.919	4.675	1.2661	3.352	455	R5
26_1	5.033	5.887	0.854935	3.713	456	R5		10_3	6.22	5.455	1.14024	2.55	456	R5
26_2	4.826	5.253	0.918713	3.677	457	R5		10_4	5.108	5.785	0.882973	2.458	457	R5
26_3	4.061	6.571	0.618019	3.872	458	R5		10_5	5.108	5.785	0.882973	3.062	458	R5
26_4	4.061	6.571	0.618019	4.176	459	R5		10_6	4.318	6.051	0.713601	3.479	459	R5
26_5	3.948	6.398	0.617068	3.6	460	R5		10_7	4.318	6.051	0.713601	3.166	460	R5
26_6	4.031	6.016	0.670047	4.07	461	R5		10_8	5.02	5.324	0.9429	3.465	461	R5
27_1	6.438	5.065	1.27108	3.105	462	R5		10_9	5.045	5.53	0.912297	3.031	462	R5
27_2	6.464	5.158	1.2532	3.554	463	R5		10_10	5.533	5.512	1.00381	3.205	463	R5
27_3	6.147	5.292	1.16156	3.27	464	R5		10_11	5.533	5.512	1.00381	2.952	464	R5
27_4	5.209	5.663	0.91983	3.116	465	R5		10_12	5.768	4.744	1.21585	3.74	465	R5
28_1	5.498	5.799	0.948094	3.446	466	R5		11_1	4.162	5.932	0.701618	3.719	466	R5
28_2	5.498	5.799	0.948094	3.415	467	R5		11_2	4.162	5.932	0.701618	2.798	467	R5
28_3	5.561	5.197	1.07004	3.072	468	R5		11_3	5.462	5.687	0.960436	3.378	468	R5
28_4	4.625	5.875	0.787234	3.2	469	R5		11_4	5.462	5.687	0.960436	3.891	469	R5
28_5	4.625	5.875	0.787234	2.652	470	R5		11_5	5.076	5.517	0.920065	3.143	470	R5
28_6	5.263	5.93	0.887521	3.713	471	R5		11_6	6.139	5.384	1.14023	3.205	471	R5
28_7	5.263	5.93	0.887521	4.305	472	R5		11_7	5.139	5.608	0.916369	3.189	472	R5
28_8	6.17	4.701	1.31249	3.23	473	R5		12_1	6.439	5.506	1.16945	3.368	473	R5
29_1	5.751	5.548	1.03659	3.274	474	R5		12_2	6.244	5.091	1.22648	3.337	474	R5
29_2	5.751	5.548	1.03659	2.569	475	R5		13_1	5.303	6.026	0.88002	3.489	475	R5
30_1	4.022	5.565	0.722731	2.943	476	R5		13_2	6.656	6.723	0.990034	3.312	476	R5
31_1	5.023	5.743	0.87463	3.521	477	R5		13_3	5.575	5.505	1.01272	4.075	477	R5
31_2	5.023	5.743	0.87463	3.01	478	R5		13_4	5.575	5.505	1.01272	3.713	478	R5
31_3	4.286	5.559	0.771002	4.269	479	R5		13_5	6.453	6.858	0.940945	3.595	479	R5
31_4	4.286	5.559	0.771002	2.559	480	R5		13_6	6.453	6.858	0.940945	3.258	480	R5
31_5	4.565	5.045	0.904856	4.342	481	R5		13_7	5.295	5.84	0.906678	4.611	481	R5
31_6	4.565	5.045	0.904856	3.443	482	R5		13_8	5.295	5.84	0.906678	6.859	482	R5
31_7	4.955	5.526	0.89667	2.834	483	R5		13_9	5.552	5.687	0.976262	3.033	483	R5
31_8	4.955	5.526	0.89667	3.404	484	R5		13_10	5.552	5.687	0.976262	3.082	484	R5
31_9	4.582	5.589	0.819825	3.307	485	R5		14_1	5.466	5.737	0.952763	3.092	485	R5
31_10	4.582	5.589	0.819825	3.824	486	R5		14_2	5.466	5.737	0.952763	4.836	486	R5
31_11	5.141	6.179	0.832012	2.945	487	R5		14_3	5.655	5.821	0.971483	3.112	487	R5
31_12	5.141	6.179	0.832012	2.824	488	R5		14_4	5.655	5.821	0.971483	3.467	488	R5
32_1	5.707	4.58	1.24607	3.08	489	R5		14_5	4.693	6.137	0.764706	3.352	489	R5
32_2	5.707	4.58	1.24607	2.845	490	R5		14_6	4.693	6.137	0.764706	3.295	490	R5
32_3	5.57	4.711	1.18234	3.605	491	R5		14_7	5.641	6.521	0.865051	5.704	491	R5
34_1	5.651	5.377	1.05096	2.643	492	R5		14_8	5.641	6.521	0.865051	5.571	492	R5
35_1	5.089	5.782	0.880145	2.954	493	R5		14_9	6.068	7.064	0.859003	3.43	493	R5
35_2	5.807	6.1	0.951967	3.397	494	R5		14_10	6.068	7.064	0.859003	3.84	494	R5
35_3	5.58	6.097	0.915204	3.501	495	R5		14_11	5.008	6.498	0.770699	3.43	495	R5
35_4	5.017	5.804	0.864404	3.897	496	R5		14_12	5.008	6.498	0.770699	4.131	496	R5
36_1	5.79	5.581	1.03745	2.996	497	R5		15_1	7.648	5.3	1.44302	3.032	497	R5
36_2	5.462	5.911	0.92404	3.347	498	R5		15_2	6.348	5.04	1.25952	3.706	498	R5
36_3	5.7	5.315	1.07244	3.195	499	R5		15_3	5.981	5.809	1.02961	4.074	499	R5
37_1	5.114	6.578	0.77744	4.225	500	R5		15_4	6.302	5.697	1.1062	3.556	500	R5
37_2	6.307	6.33	0.996367	5.083	501	R5		15_5	6.291	6.872	0.915454	3.433	501	R5
37_3	4.821	6.195	0.778208	5.143	502	R5		15_6	6.291	6.872	0.915454	4.155	502	R5
37_4	4.821	6.195	0.778208	5.218	503	R5		15_7	6.533	5.66	1.15424	3.821	503	R5
37_5	5.114	6.556	0.780049	3.876	504	R5		15_8	6.533	5.66	1.15424	2.808	504	R5
37_6	5.114	6.556	0.780049	4.356	505	R5		15_9	5.939	6.255	0.94948	3.165	505	R5
37_7	5.094	6.27	0.81244	3.117	506	R5		16_1	4.893	5.682	0.86114	2.948	506	R5
37_8	5.094	6.27	0.81244	3.9	507	R5		16_2	4.104	6.336	0.647727	3.554	507	R5
38_1	5.973	5.95	1.00387	3.29	508	R5		16_3	5.26	6.251	0.841465	2.869	508	R5
38_2	5.973	5.95	1.00387	3.046	509	R5		16_4	5.26	6.251	0.841465	3.67	509	R5
38_3	7.278	5.506	1.32183	2.656	510	R5		16_5	4.524	6.617	0.683694	3.118	510	R5
38_4	5.781	5.785	0.999309	3.349	511	R5		16_6	4.524	6.617	0.683694	4.264	511	R5
38_5	5.781	5.785	0.999309	3.697	512	R5		16_7	4.916	5.652	0.869781	3.131	512	R5
38_6	5.117	5.694	0.898665	4.695	513	R5		16_8	4.916	5.652	0.869781	4.464	513	R5
38_7	5.117	5.694	0.898665	3.27	514	R5		17_1	6.199	5.355	1.15761	2.047	514	R5
38_8	6.067	5.95	1.01966	3.066	515	R5		17_2	6.723	5.507	1.22081	3.666	515	R5
38_9	6.067	5.95	1.01966	4.964	516	R5		17_3	6.723	5.507	1.22081	4.275	516	R5
01_1	4.256	5.063	0.840608	2.535	517	R6		17_4	5.956	5.351	1.11306	2.179	517	R5
01_2	3.299	5.942	0.5552	3.184	518	R6		17_5	5.956	5.351	1.11306	4.837	518	R5
01_3	3.299	5.942	0.5552	3.186	519	R6		17_6	5.941	5.257	1.13011	4.29	519	R5
01_4	3.254	6.259	0.519891	3.395	520	R6		17_7	6.09	4.94	1.23279	3.34	520	R5
01_5	3.254	6.259	0.519891	2.671	521	R6		17_8	6.09	4.94	1.23279	3.532	521	R5
02_1	4.143	6.033	0.686723	2.713	522	R6		17_9	4.654	5.515	0.84388	4.047	522	R5
02_2	4.143	6.033	0.686723	2.737	523	R6		18_1	3.704	5.451	0.679508	3.289	523	R5
02_3	4.785	6.124	0.781352	3.375	524	R6		18_2	5.645	5.239	1.0775	3.645	524	R5
02_4	4.785	6.124	0.781352	3.34	525	R6		18_3	4.011	6.502	0.616887	2.925	525	R5
02_5	4.639	5.24	0.885305	3.177	526	R6		18_4	4.011	6.502	0.616887	2.982	526	R5
02_6	4.639	5.24	0.885305	4.935	527	R6		18_5	5.451	5.631	0.968034	2.76	527	R5
02_7	4.86	5.356	0.907394	3.793	528	R6		18_6	5.451	5.631	0.968034	3.637	528	R5
02_8	4.574	6.23	0.734189	3.594	529	R6		20_1	5.388	5.608	0.96077	3.383	529	R5
03_1	4.177	5.739	0.727827	3.14	530	R6		20_2	5.656	5.519	1.02482	3.307	530	R5
03_2	4.192	5.844	0.717317	3.217	531	R6		20_3	5.656	5.519	1.02482	3.201	531	R5
03_3	4.192	5.844	0.717317	3.047	532	R6		20_4	5.682	5.789	0.981517	3.866	532	R5
03_4	3.982	5.503	0.723605	3.521	533	R6		20_5	5.682	5.789	0.981517	4.193	533	R5
03_5	3.982	5.503	0.723605	3.717	534	R6		20_6	4.527	6.086	0.743838	3.6	534	R5
04_1	4.612	6.143	0.750773	2.593	535	R6		20_7	4.244	6.287	0.675044	4.351	535	R5
04_2	4.612	6.143	0.750773	2.559	536	R6		21_1	7.211	4.821	1.49575	2.773	536	R5
04_3	4.875	5.4	0.902778	3.305	537	R6		21_2	5.548	4.492	1.23508	3.428	537	R5
04_4	4.875	5.4	0.902778	2.525	538	R6		21_3	5.506	5.382	1.02304	2.92	538	R5
04_5	3.893	6.322	0.615786	2.992	539	R6		21_4	5.506	5.382	1.02304	3.93	539	R5
04_6	3.893	6.322	0.615786	2.627	540	R6		21_5	5.574	5.587	0.997673	3.56	540	R5
04_7	3.795	5.867	0.646838	3.326	541	R6		21_6	5.574	5.587	0.997673	3.705	541	R5
05_1	4.258	6.258	0.680409	3.705	542	R6		21_7	6.044	5.888	1.02649	2.418	542	R5
05_2	4.258	6.258	0.680409	3.294	543	R6		21_8	5.591	5.934	0.942198	3.259	543	R5
05_3	3.322	6.165	0.538848	3.174	544	R6		22_1	6.934	4.796	1.44579	2.887	544	R5
05_4	3.295	6.944	0.47451	4.197	545	R6		22_2	6.114	5.415	1.12909	4.475	545	R5
05_5	3.453	6.155	0.561007	4.284	546	R6		22_3	6.341	5.472	1.15881	3.073	546	R5
05_6	3.61	6.258	0.576862	3.131	547	R6		22_4	6.654	5.183	1.28381	3.547	547	R5
05_7	3.61	6.258	0.576862	4.392	548	R6		23_1	5.465	6.096	0.89649	3.109	548	R5
05_8	3.698	6.359	0.581538	3.317	549	R6		23_2	6.782	5.413	1.25291	3.581	549	R5
06_1	4.331	6.344	0.682692	3.728	550	R6		23_3	6.546	4.771	1.37204	3.299	550	R5
06_2	4.331	6.344	0.682692	3.311	551	R6		23_4	5.02	5.062	0.991703	3.139	551	R5
07_1	3.671	6.496	0.565117	3.49	552	R6		23_5	5.02	5.062	0.991703	3.897	552	R5
07_2	3.631	6.34	0.572713	3.344	553	R6		23_6	4.401	5.445	0.808264	3.492	553	R5
07_3	3.631	6.34	0.572713	3.148	554	R6		23_7	4.401	5.445	0.808264	3.584	554	R5
07_4	4.457	6.003	0.742462	3.587	555	R6		23_8	5.19	5.139	1.00992	3.002	555	R5
07_5	4.457	6.003	0.742462	4.252	556	R6		23_9	5.19	5.139	1.00992	3.915	556	R5
07_6	4.035	6.299	0.640578	3.736	557	R6		23_10	5.285	5.658	0.934076	4.007	557	R5
07_7	4.035	6.299	0.640578	3.095	558	R6		23_11	5.285	5.658	0.934076	4.531	558	R5
08_1	4.37	6.124	0.713586	3.426	559	R6		23_12	4.938	5.577	0.885422	3.804	559	R5
08_2	4.37	6.124	0.713586	3.499	560	R6		23_13	4.938	5.577	0.885422	3.647	560	R5
08_3	3.78	6.62	0.570997	4.325	561	R6		23_14	5.869	5.389	1.08907	3.149	561	R5
08_4	3.78	6.62	0.570997	2.956	562	R6		23_15	5.869	5.389	1.08907	3.046	562	R5
09_1	4.344	5.185	0.837801	3.504	563	R6		23_16	4.673	6.997	0.667858	3.654	563	R5
09_2	4.288	5.342	0.802696	2.987	564	R6		23_17	4.673	6.997	0.667858	7.128	564	R5
09_3	5.642	5.615	1.00481	1.974	565	R6		24_1	5.684	5.184	1.09645	3.494	565	R5
09_4	5.642	5.615	1.00481	2.918	566	R6		24_2	5.29	6.182	0.85571	3.056	566	R5
09_5	3.882	5.387	0.720624	3.104	567	R6		24_3	5.912	4.935	1.19797	3.674	567	R5
09_6	3.882	5.387	0.720624	2.761	568	R6		24_4	5.912	4.935	1.19797	3.308	568	R5
10_1	5.069	5.456	0.929069	2.14	569	R6		24_5	4.432	5.839	0.759034	3.909	569	R5
10_2	5.9	4.813	1.22585	2.564	570	R6		24_6	4.279	6.227	0.687169	2.953	570	R5
10_3	5.382	5.311	1.01337	2.604	571	R6		24_7	6.316	4.895	1.2903	2.904	571	R5
10_4	5.382	5.311	1.01337	2.975	572	R6		24_8	6.316	4.895	1.2903	5.22	572	R5
10_5	4.369	5.678	0.769461	3.193	573	R6		24_9	4.836	5.575	0.867444	3.041	573	R5
10_6	4.369	5.678	0.769461	3.617	574	R6		24_10	4.529	6.277	0.721523	3.849	574	R5
10_7	4.355	5.47	0.796161	3.213	575	R6		26_1	6.254	4.889	1.2792	4.003	575	R5
10_8	4.355	5.47	0.796161	2.985	576	R6		26_2	6.254	4.889	1.2792	3.938	576	R5
10_9	3.556	6.09	0.583908	3.622	577	R6		26_3	6.024	5.247	1.14809	3.602	577	R5
10_10	4.031	5.467	0.737333	3.688	578	R6		26_4	6.574	4.834	1.35995	3.559	578	R5
11_1	5.076	5.403	0.939478	2.29	579	R6		26_5	6.574	4.834	1.35995	6.084	579	R5
11_2	4.665	6.165	0.756691	3.557	580	R6		27_1	7.7	4.65	1.65591	3.486	580	R5
11_3	4.665	6.165	0.756691	4.263	581	R6		27_2	6.137	5.533	1.10916	3.978	581	R5
12_1	3.965	5.804	0.68315	3.438	582	R6		27_3	5.953	4.824	1.23404	3.035	582	R5
12_2	3.965	5.804	0.68315	3.27	583	R6		27_4	6.065	5.534	1.09595	3.869	583	R5
12_3	5.278	6.22	0.848553	2.73	584	R6		27_5	6.065	5.534	1.09595	4.237	584	R5
12_4	5.278	6.22	0.848553	3.618	585	R6		27_6	7.497	6.138	1.22141	3.251	585	R5
12_5	4.642	5.318	0.872885	3.472	586	R6		27_7	7.497	6.138	1.22141	3.426	586	R5
12_6	3.646	6.3	0.57873	3.24	587	R6		28_1	7.021	5.393	1.30187	3.738	587	R5
13_1	4.637	5.147	0.900913	3.177	588	R6		28_2	6.531	4.759	1.37235	4.517	588	R5
13_2	5.312	5.631	0.943349	2.613	589	R6		28_3	6.014	5.705	1.05416	4.517	589	R5
13_3	5.103	6.033	0.845848	3.232	590	R6		28_4	6.037	5.619	1.07439	2.806	590	R5
13_4	5.103	6.033	0.845848	3.582	591	R6		28_5	6.037	5.619	1.07439	4.643	591	R5
14_1	3.925	6.838	0.573998	3.071	592	R6		29_1	7.651	5.519	1.3863	3.802	592	R5
14_2	3.925	6.838	0.573998	3.686	593	R6		29_2	5.671	5.507	1.02978	4.317	593	R5
14_3	3.159	6.497	0.486224	4.466	594	R6		29_3	5.671	5.507	1.02978	4.601	594	R5
14_4	3.159	6.497	0.486224	3.702	595	R6		29_4	5.064	5.854	0.86505	4.493	595	R5
14_5	3.046	6.662	0.45722	4.63	596	R6		29_5	5.189	6.166	0.84155	3.81	596	R5
14_6	3.046	6.662	0.45722	3.399	597	R6		29_6	4.681	6.468	0.723717	3.591	597	R5
14_7	3.685	6.612	0.55732	3.483	598	R6		29_7	4.854	5.651	0.858963	4.681	598	R5
14_8	3.43	6.999	0.49007	4.086	599	R6		29_8	4.854	5.651	0.858963	3.336	599	R5
14_9	3.745	5.798	0.645912	5.245	600	R6		30_1	6.99	5.105	1.36925	2.9	600	R5
14_10	3.745	5.798	0.645912	4.648	601	R6		30_2	6.99	5.105	1.36925	4.038	601	R5
15_1	4.342	6.718	0.646323	3.661	602	R6		30_3	7.197	5.019	1.43395	4.257	602	R5
15_2	4.342	6.718	0.646323	3.191	603	R6		30_4	7.197	5.019	1.43395	3.586	603	R5
15_3	4.16	7.02	0.592593	3.19	604	R6		30_5	7.495	4.663	1.60733	4.584	604	R5
15_4	4.16	7.02	0.592593	3.139	605	R6		30_6	7.495	4.663	1.60733	4.044	605	R5
15_5	4.108	6.655	0.61728	3.817	606	R6		30_7	6.669	5.157	1.29319	3.151	606	R5
16_1	4.84	6.061	0.798548	2.588	607	R6		30_8	6.669	5.157	1.29319	2.98	607	R5
16_2	4.84	6.061	0.798548	3.026	608	R6		31_1	7.052	4.521	1.55983	3.801	608	R5
17_1	4.468	6.248	0.715109	3.673	609	R6		31_2	7.293	4.217	1.72943	4.752	609	R5
17_2	4.468	6.248	0.715109	3.289	610	R6		31_3	6.49	7.004	0.926613	6.339	610	R5
17_3	4.644	5.638	0.823696	3.039	611	R6		31_4	6.49	7.004	0.926613	3.257	611	R5
17_4	4.644	5.638	0.823696	2.902	612	R6		32_1	5.788	5.741	1.00819	2.63	612	R5
17_5	5.285	6.01	0.879368	3.368	613	R6		32_2	5.788	5.741	1.00819	2.87	613	R5
17_6	5.285	6.01	0.879368	2.843	614	R6		32_3	5.314	7.034	0.755473	2.725	614	R5
17_7	4.57	6.226	0.734019	2.592	615	R6		32_4	5.314	7.034	0.755473	2.814	615	R5
17_8	4.57	6.226	0.734019	2.661	616	R6		32_5	4.61	5.742	0.802856	3.591	616	R5
17_9	4.237	5.749	0.736998	3.734	617	R6		32_6	4.61	5.742	0.802856	3.053	617	R5
17_10	4.237	5.749	0.736998	3.168	618	R6		32_7	5.499	5.5	0.999818	3.544	618	R5
17_11	5.332	5.755	0.926499	3.388	619	R6		33_1	7.535	4.696	1.60456	4.266	619	R5
17_12	5.332	5.755	0.926499	2.996	620	R6		33_2	7.535	4.696	1.60456	2.484	620	R5
17_13	5.101	5.817	0.876912	2.59	621	R6		33_3	6.696	5.321	1.25841	3.016	621	R5
17_14	3.501	5.766	0.60718	3.496	622	R6		33_4	5.459	5.206	1.0486	3.568	622	R5
18_1	4.953	6.232	0.794769	2.756	623	R6		33_5	5.459	5.206	1.0486	3.868	623	R5
18_2	4.642	4.781	0.970927	3.17	624	R6		33_6	5.385	5.462	0.985903	3.229	624	R5
18_3	6.28	6.983	0.899327	3.357	625	R6		33_7	5.385	5.462	0.985903	2.672	625	R5
18_4	6.28	6.983	0.899327	3.069	626	R6		33_8	5.339	5.641	0.946463	2.214	626	R5
19_1	5.768	4.756	1.21278	3.385	627	R6		33_9	6.452	5.486	1.17609	3.093	627	R5
19_2	4.478	5.31	0.843315	2.251	628	R6		34_1	7.33	5.621	1.30404	3.775	628	R5
19_3	4.169	5.815	0.716939	3.471	629	R6		35_1	4.925	5.698	0.864338	3.824	629	R5
19_4	4.169	5.815	0.716939	2.833	630	R6		35_2	4.603	6.012	0.765635	4.128	630	R5
19_5	5.477	5.25	1.04324	3.176	631	R6		35_3	4.1	5.645	0.726306	4.154	631	R5
19_6	5.477	5.25	1.04324	3.439	632	R6		35_4	4.053	6.416	0.631702	3.96	632	R5
19_7	3.966	5.618	0.705945	3.458	633	R6		35_5	4.276	6.48	0.659877	4.999	633	R5
20_1	5.143	5.654	0.909622	2.768	634	R6		36_1	4.948	5.949	0.831736	3.552	634	R5
21_1	4.557	6.024	0.756474	3.299	635	R6		36_2	4.502	6.647	0.677298	3.837	635	R5
21_2	4.156	5.554	0.74829	3.127	636	R6		36_3	4.502	6.647	0.677298	2.879	636	R5
21_3	4.292	5.722	0.750087	4.109	637	R6		36_4	4.003	6.225	0.643052	3.651	637	R5
21_4	3.787	4.936	0.76722	3.546	638	R6		36_5	4.003	6.225	0.643052	3.46	638	R5
21_5	4.513	4.994	0.903684	2.838	639	R6		36_6	3.804	6.589	0.577326	4.59	639	R5
21_6	4.513	4.994	0.903684	2.858	640	R6		36_7	4.337	6.647	0.652475	4.614	640	R5
21_7	3.527	5.19	0.679576	2.62	641	R6		37_1	5.691	5.736	0.992155	2.291	641	R5
21_8	3.527	5.19	0.679576	3.254	642	R6		37_2	5.49	5.659	0.970136	2.357	642	R5
21_9	4.142	5.249	0.789103	3.015	643	R6		37_3	5.788	4.759	1.21622	4.28	643	R5
21_10	4.142	5.249	0.789103	2.772	644	R6		37_4	5.389	5.517	0.976799	3.289	644	R5
21_11	4.535	5.832	0.777606	2.981	645	R6		38_1	5.214	5.772	0.903326	5.17	645	R5
21_12	3.745	6.092	0.614741	4.033	646	R6		38_2	5.214	5.772	0.903326	3.671	646	R5
21_13	3.745	6.092	0.614741	3.235	647	R6		38_3	3.865	6.057	0.638105	3.746	647	R5
21_14	3.859	5.653	0.682646	3.371	648	R6		38_4	3.865	6.057	0.638105	3.328	648	R5
21_15	3.642	6.407	0.568441	3.88	649	R6		38_5	5.99	6.038	0.99205	2.848	649	R5
21_16	3.568	6.318	0.564736	5.194	650	R6		38_6	5.99	6.038	0.99205	3.345	650	R5
21_17	3.568	6.318	0.564736	3.233	651	R6		39_1	6.53	6.148	1.06213	3.062	651	R5
22_1	4.728	5.894	0.802172	3.05	652	R6		39_2	4.939	5.72	0.863462	3.873	652	R5
22_2	4.38	6.119	0.715803	3.095	653	R6		39_3	4.939	5.72	0.863462	3.883	653	R5
22_3	5.005	6.183	0.809478	3.355	654	R6		39_4	4.326	6.519	0.663599	3.937	654	R5
22_4	4.063	5.493	0.739669	3.163	655	R6		39_5	4.34	6.669	0.650772	3.497	655	R5
22_5	4.548	5.047	0.901129	3.23	656	R6		40_1	6.198	5.356	1.15721	2.765	656	R5
22_6	4.139	5.464	0.757504	3.062	657	R6		40_2	6.226	5.07	1.22801	3.272	657	R5
22_7	4.23	5.721	0.739381	4.053	658	R6		40_3	6.461	5.512	1.17217	3.982	658	R5
22_8	4.772	6.004	0.794803	3.223	659	R6		40_4	6.53	4.728	1.38113	2.82	659	R5
22_9	4.772	6.004	0.794803	4.074	660	R6		01_1	5.33	4.944	1.07807	2.955	660	R6
22_10	4.289	5.96	0.719631	3.672	661	R6		01_2	5.33	4.944	1.07807	2.794	661	R6
22_11	4.289	5.96	0.719631	5.494	662	R6		01_3	6.047	4.92	1.22907	2.901	662	R6
23_1	5.302	5.478	0.967871	3.149	663	R6		01_4	6.047	4.92	1.22907	3.255	663	R6
23_2	5.435	5.114	1.06277	2.832	664	R6		02_1	5.582	4.496	1.24155	2.396	664	R6
23_3	4.606	5.636	0.817246	2.966	665	R6		02_2	6.42	4.616	1.39081	3.789	665	R6
23_4	4.606	5.636	0.817246	3.023	666	R6		02_3	5.306	5.052	1.05028	3.548	666	R6
23_5	4.968	6.798	0.730803	3.804	667	R6		02_4	5.306	5.052	1.05028	2.227	667	R6
23_6	4.968	6.798	0.730803	3.168	668	R6		03_1	4.51	5.613	0.803492	2.874	668	R6
23_7	5.105	5.427	0.940667	3.298	669	R6		03_2	3.304	6.294	0.524944	2.989	669	R6
23_8	5.105	5.427	0.940667	3.024	670	R6		03_3	3.452	6.256	0.55179	2.9	670	R6
23_9	3.707	6.451	0.57464	3.159	671	R6		03_4	3.853	5.88	0.655272	3.769	671	R6
23_10	3.707	6.451	0.57464	3.326	672	R6		03_5	3.778	6.027	0.626846	3.81	672	R6
23_11	3.993	5.638	0.70823	3.864	673	R6		03_6	4.544	5.968	0.761394	2.602	673	R6
23_12	3.991	6.268	0.636726	3.288	674	R6		03_7	4.544	5.968	0.761394	3.089	674	R6
24_1	3.982	5.511	0.722555	2.037	675	R6		04_1	5.892	5.249	1.1225	3.13	675	R6
24_2	5.603	5.039	1.11193	3.08	676	R6		04_2	5.892	5.249	1.1225	2.712	676	R6
24_3	5.603	5.039	1.11193	2.422	677	R6		04_3	5.424	5.741	0.944783	5.068	677	R6
25_1	4.837	6.081	0.795428	3.278	678	R6		04_4	5.424	5.741	0.944783	2.563	678	R6
25_2	4.837	6.081	0.795428	4.114	679	R6		05_1	5.346	5.935	0.900758	3.082	679	R6
25_3	4.833	5.964	0.810362	3.221	680	R6		05_2	4.948	5.517	0.896864	2.649	680	R6
25_4	4.833	5.964	0.810362	4.801	681	R6		05_3	4.113	6.147	0.669107	2.902	681	R6
25_5	3.369	6.442	0.522974	3.529	682	R6		05_4	3.76	6.426	0.585123	2.74	682	R6
25_6	3.369	6.442	0.522974	3.665	683	R6		05_5	3.76	6.426	0.585123	3.587	683	R6
001_1	4.797	4.978	0.96364	2.439	684	R6		05_6	4.875	5.543	0.879488	2.667	684	R6
001_2	5.48	5.69	0.963093	2.502	685	R6		05_7	4.875	5.543	0.879488	3.282	685	R6
002_1	4.986	4.939	1.00952	2.787	686	R6		05_8	4.611	5.656	0.81524	3.144	686	R6
002_2	4.986	4.939	1.00952	2.981	687	R6		05_9	4.611	5.656	0.81524	3.179	687	R6
002_3	4.429	5.614	0.788921	2.539	688	R6		06_1	4.522	5.372	0.841772	3.21	688	R6
002_4	4.987	5.438	0.917065	2.595	689	R6		06_2	4.522	5.372	0.841772	2.619	689	R6
002_5	4.963	5.537	0.896334	2.587	690	R6		06_3	5.426	5.515	0.983862	3.117	690	R6
003_1	4.937	5.119	0.964446	3.274	691	R6		06_4	5.426	5.515	0.983862	2.344	691	R6
003_2	4.498	5.569	0.807685	3.634	692	R6		06_5	5.066	5.413	0.935895	3.165	692	R6
003_3	4.498	5.569	0.807685	3.239	693	R6		06_6	4.605	5.644	0.815911	3.295	693	R6
004_1	5.977	4.957	1.20577	3.875	694	R6		06_7	5.162	5.864	0.880286	3.016	694	R6
005_1	4.826	5.734	0.841646	3.582	695	R6		06_8	5.373	4.937	1.08831	2.839	695	R6
005_2	4.398	5.792	0.759323	2.672	696	R6		07_1	4.71	5.917	0.796011	2.865	696	R6
005_3	4.413	5.701	0.774075	3.544	697	R6		07_2	4.71	5.917	0.796011	3.965	697	R6
005_4	4.255	4.975	0.855276	3.42	698	R6		07_3	4.368	6.126	0.713026	2.976	698	R6
005_5	3.874	5.945	0.65164	3.465	699	R6		07_4	4.368	6.126	0.713026	2.873	699	R6
005_6	4.112	5.853	0.702546	3.042	700	R6		07_5	4.492	5.873	0.764856	3.064	700	R6
005_7	3.444	6.218	0.553876	3.383	701	R6		07_6	4.492	5.873	0.764856	2.62	701	R6
005_8	3.444	6.218	0.553876	4.016	702	R6		08_1	5.633	5.989	0.940558	3.941	702	R6
005_9	4.562	5.622	0.811455	3.031	703	R6		08_2	5.633	5.989	0.940558	3.054	703	R6
005_10	4.562	5.622	0.811455	3.061	704	R6		08_3	5.446	5.432	1.00258	3.699	704	R6
006_1	4.528	5.413	0.836505	3.595	705	R6		08_4	5.446	5.432	1.00258	4.489	705	R6
006_2	4.528	5.413	0.836505	3.408	706	R6		08_5	4.495	5.954	0.754955	5.597	706	R6
006_3	5.413	5.458	0.991755	2.955	707	R6		08_6	4.495	5.954	0.754955	4.411	707	R6
006_4	4.971	5.455	0.911274	2.88	708	R6		08_7	4.558	7.091	0.642787	3.241	708	R6
007_1	4.893	5.609	0.872348	2.801	709	R6		08_8	5.135	5.358	0.95838	2.764	709	R6
007_2	4.48	5.755	0.778454	3.052	710	R6		09_1	5.799	5.281	1.09809	4.161	710	R6
007_3	4.48	5.755	0.778454	2.943	711	R6		09_2	4.321	6.319	0.683811	3.687	711	R6
007_4	3.751	6.063	0.618671	4.14	712	R6		09_3	5.145	5.281	0.974247	3.711	712	R6
007_5	3.751	6.063	0.618671	3.629	713	R6		09_4	6.309	6.006	1.05045	2.895	713	R6
007_6	3.368	6.757	0.498446	3.466	714	R6		09_5	6.309	6.006	1.05045	4.871	714	R6
008_1	5.534	5.384	1.02786	2.973	715	R6		09_6	4.456	6.175	0.721619	3.955	715	R6
008_2	5.279	4.963	1.06367	2.616	716	R6		09_7	4.456	6.175	0.721619	3.893	716	R6
008_3	3.862	5.709	0.676476	3.754	717	R6		09_8	5.395	5.19	1.0395	3.148	717	R6
008_4	5.128	5.595	0.916533	2.67	718	R6		10_1	5.505	5.054	1.08924	3.835	718	R6
008_5	5.128	5.595	0.916533	4	719	R6		10_2	5.505	5.054	1.08924	4.157	719	R6
008_6	4.3	5.798	0.741635	3.597	720	R6		10_3	5.192	5.973	0.869245	3.499	720	R6
008_7	4.3	5.798	0.741635	2.407	721	R6		10_4	5.351	5.753	0.930123	3.546	721	R6
008_8	4.226	5.603	0.754239	2.894	722	R6		10_5	5.351	5.753	0.930123	3.161	722	R6
008_9	3.676	6.223	0.590712	2.762	723	R6		10_6	5.58	5.364	1.04027	4.026	723	R6
009_1	4.887	5.463	0.894563	2.413	724	R6		12_1	5.168	4.739	1.09052	3.816	724	R6
009_2	5.726	5.239	1.09296	2.373	725	R6		12_2	5.463	4.987	1.09545	3.34	725	R6
009_3	4.681	5.79	0.808463	3.314	726	R6		12_3	4.467	5.131	0.870591	2.97	726	R6
010_1	4.626	6.409	0.721797	3.05	727	R6		12_4	4.645	5.501	0.844392	3.989	727	R6
010_2	5.233	5.74	0.911672	2.546	728	R6		12_5	4.645	5.501	0.844392	3.395	728	R6
010_3	5.233	5.74	0.911672	2.759	729	R6		12_6	5.753	5.423	1.06085	3.013	729	R6
010_4	5.1	5.687	0.896782	2.754	730	R6		12_7	5.753	5.423	1.06085	2.472	730	R6
010_5	4.348	5.813	0.747979	2.786	731	R6		12_8	4.932	5.619	0.877736	3.453	731	R6
011_1	5.231	4.938	1.05934	2.376	732	R6		12_9	4.932	5.619	0.877736	2.972	732	R6
011_2	4.798	5.026	0.954636	3.326	733	R6		12_10	5.738	4.275	1.34222	2.59	733	R6
011_3	5.096	5.614	0.907731	2.825	734	R6		13_1	4.648	5.757	0.807365	2.888	734	R6
011_4	4.466	5.637	0.792265	1.911	735	R6		13_2	4.603	6.512	0.706849	4.068	735	R6
011_5	4.466	5.637	0.792265	4.009	736	R6		13_3	4.603	6.512	0.706849	3.455	736	R6
								13_4	6.002	5.957	1.00755	3	737	R6
								13_5	6.002	5.957	1.00755	2.867	738	R6
								13_6	5.028	5.625	0.893867	3.127	739	R6
								13_7	5.028	5.625	0.893867	3.095	740	R6
								13_8	5.618	5.753	0.976534	3.308	741	R6
								13_9	5.618	5.753	0.976534	2.848	742	R6
								13_10	5.403	5.653	0.955776	3.386	743	R6
								13_11	5.392	5.437	0.991723	3.312	744	R6
								14_1	6.559	4.601	1.42556	3.719	745	R6
								14_2	6.663	5.239	1.27181	3.136	746	R6
								14_3	6.429	5.3	1.21302	4.225	747	R6
								14_4	6.254	5.128	1.21958	4.168	748	R6
								14_5	6.508	5.242	1.24151	2.677	749	R6
								14_6	6.497	5.367	1.21055	2.729	750	R6
								14_7	5.626	5.3	1.06151	3.495	751	R6
								14_8	5.626	5.3	1.06151	2.368	752	R6
								14_9	4.927	5.355	0.920075	2.831	753	R6
								14_10	4.927	5.355	0.920075	2.543	754	R6
								15_1	4.525	5.699	0.793999	3.384	755	R6
								15_2	5.158	5.546	0.93004	2.753	756	R6
								16_1	6.096	5.358	1.13774	2.726	757	R6
								16_2	5.672	5.471	1.03674	3.672	758	R6
								16_3	5.672	5.471	1.03674	2.868	759	R6
								16_4	6.118	5.174	1.18245	2.662	760	R6
								16_5	6.118	5.174	1.18245	3.024	761	R6
								17_1	5.265	5.907	0.891315	3.542	762	R6
								17_2	5.18	6.298	0.822483	2.784	763	R6
								17_3	5.348	5.913	0.904448	3.992	764	R6
								17_4	4.021	6.553	0.613612	5.121	765	R6
								17_5	4.021	6.553	0.613612	3.574	766	R6
								17_6	4.537	5.453	0.832019	3.08	767	R6
								17_7	4.537	5.453	0.832019	3.171	768	R6
								17_8	4.735	6.446	0.734564	3.953	769	R6
								17_9	4.735	6.446	0.734564	3.602	770	R6
								17_10	5.561	5.979	0.930089	3.064	771	R6
								17_11	5.561	5.979	0.930089	3.632	772	R6
								17_12	6.152	5.694	1.08044	4.29	773	R6
								17_13	4.567	5.469	0.83507	2.896	774	R6
								17_14	4.567	5.469	0.83507	2.865	775	R6
								17_15	4.577	5.927	0.772229	2.705	776	R6
								17_16	4.577	5.927	0.772229	3.826	777	R6
								18_1	6.504	6.142	1.05894	3.568	778	R6
								18_2	6.119	5.623	1.08821	3.749	779	R6
								18_3	5.603	5.404	1.03683	3.547	780	R6
								18_4	5.299	5.961	0.888945	2.693	781	R6
								18_5	5.624	5.196	1.08237	3.571	782	R6
								18_6	5.624	5.196	1.08237	3.785	783	R6
								18_7	5.487	5.511	0.995645	2.975	784	R6
								18_8	5.487	5.511	0.995645	3.343	785	R6
								19_1	5.999	4.804	1.24875	3.92	786	R6
								19_2	6.382	5.345	1.19401	3.802	787	R6
								19_3	6.135	5.368	1.14288	3.73	788	R6
								19_4	6.135	5.368	1.14288	4.291	789	R6
								19_5	6.157	4.984	1.23535	2.594	790	R6
								19_6	6.157	4.984	1.23535	2.664	791	R6
								20_1	5.64	5.246	1.0751	2.79	792	R6
								20_2	5.64	5.246	1.0751	3.631	793	R6
								20_3	4.747	5.235	0.906781	2.874	794	R6
								20_4	4.747	5.235	0.906781	3.617	795	R6
								21_1	5.368	5.436	0.987491	4.752	796	R6
								21_2	4.796	6.432	0.745647	3.522	797	R6
								21_3	4.796	6.432	0.745647	3.972	798	R6
								21_4	6.708	5.956	1.12626	3.005	799	R6
								22_1	7.009	5.575	1.25722	3.671	800	R6
								22_2	4.969	6.156	0.80718	3.538	801	R6
								22_3	5.5	5.333	1.03131	3.685	802	R6
								22_4	5.982	5.71	1.04764	3.773	803	R6
								22_5	4.691	5.58	0.840681	3.978	804	R6
								22_6	4.691	5.58	0.840681	4.172	805	R6
								22_7	4.279	5.952	0.718918	3.572	806	R6
								22_8	4.4	5.891	0.746902	4.223	807	R6
								22_9	4.716	6.162	0.765336	3.768	808	R6
								22_10	4.716	6.162	0.765336	3.357	809	R6
								22_11	5.907	6.063	0.97427	3.453	810	R6
								22_12	5.907	6.063	0.97427	3.839	811	R6
								23_1	5.356	5.898	0.908104	3.089	812	R6
								23_2	5.966	5.259	1.13444	3.646	813	R6
								23_3	5.966	5.259	1.13444	2.639	814	R6
								23_4	7.291	6.011	1.21294	4.21	815	R6
								23_5	7.291	6.011	1.21294	5.578	816	R6
								24_1	6.255	5.916	1.0573	2.543	817	R6
								24_2	5.602	6.309	0.887938	2.042	818	R6
								24_3	5.961	5.344	1.11546	3.998	819	R6
								25_1	5.466	4.52	1.20929	3.384	820	R6
								25_2	5.73	4.864	1.17804	2.562	821	R6
								25_3	4.289	5.832	0.735425	3.53	822	R6
								25_4	3.424	5.697	0.601018	2.273	823	R6
								25_5	3.424	5.697	0.601018	3.368	824	R6
								26_1	6.218	4.969	1.25136	3.058	825	R6
								26_2	5.32	4.909	1.08372	4.474	826	R6
								26_3	5.32	4.909	1.08372	2.929	827	R6
								26_4	5.091	4.728	1.07678	3.148	828	R6
								26_5	5.091	4.728	1.07678	2.364	829	R6
								26_6	4.552	5.29	0.860491	3.147	830	R6
								26_7	4.552	5.29	0.860491	2.772	831	R6
								26_8	5.256	5.196	1.01155	2.55	832	R6
								26_9	5.256	5.196	1.01155	3.209	833	R6
								27_1	6.255	4.511	1.38661	2.757	834	R6
								27_2	5.729	4.994	1.14718	5.059	835	R6
								27_3	5.946	5.086	1.16909	4.175	836	R6
								27_4	5.323	5.172	1.0292	2.894	837	R6
								27_5	5.323	5.172	1.0292	3.047	838	R6
								27_6	4.954	5.387	0.919621	3.091	839	R6
								27_7	4.954	5.387	0.919621	3.254	840	R6
								27_8	5.474	5.289	1.03498	3.077	841	R6
								28_1	5.028	5.469	0.919364	3.862	842	R6
								28_2	4.467	5.607	0.796683	3.605	843	R6
								28_3	5.081	5.849	0.868696	3.737	844	R6
								28_4	5.142	5.862	0.877175	3.578	845	R6
								28_5	4.6	6.12	0.751634	4.599	846	R6
								28_6	4.6	6.12	0.751634	3.887	847	R6
								28_7	4.69	6.149	0.762726	3.895	848	R6
								28_8	4.69	6.149	0.762726	4.407	849	R6
								28_9	5.547	5.8	0.956379	2.66	850	R6
								29_1	6.242	4.661	1.3392	2.684	851	R6
								29_2	5.428	5.811	0.934091	2.686	852	R6
								29_3	5.433	5.504	0.9871	3.591	853	R6
								29_4	5.94	5.359	1.10842	3.636	854	R6
								26_000_1	6.382	5.703	1.11906	3.07	855	R6
								26_000_2	5.135	5.87	0.874787	3.981	856	R6
								27_000_1	6.756	4.457	1.51582	3.52	857	R6
								27_000_2	6.391	5.206	1.22762	2.181	858	R6
								27_000_3	6.061	5.378	1.127	3.772	859	R6
								27_000_4	4.141	6.361	0.650998	3.211	860	R6
								27_000_5	5.597	5.701	0.981758	3.038	861	R6
								27_000_6	5.597	5.701	0.981758	2.828	862	R6
								27_000_7	5.777	4.996	1.15633	2.23	863	R6
								27_000_8	5.777	4.996	1.15633	3.096	864	R6
								28_000_1	4.14	5.596	0.739814	3.408	865	R6
								28_000_2	4.14	5.596	0.739814	2.825	866	R6
								28_000_3	4.425	5.065	0.873643	2.972	867	R6
								28_000_4	4.425	5.065	0.873643	2.545	868	R6
								28_000_5	4.85	5.56	0.872302	3.731	869	R6
								28_000_6	4.85	5.56	0.872302	3.064	870	R6
								28_000_7	4.481	5.403	0.829354	3.445	871	R6
								28_000_8	4.481	5.403	0.829354	3.002	872	R6
								28_000_9	5.225	4.64	1.12608	2.622	873	R6
								28_000_10	5.225	4.64	1.12608	3.154	874	R6
								28_000_11	3.813	5.493	0.694156	3.577	875	R6
								28_000_12	4.187	6.17	0.678606	3.763	876	R6
								29_000_1	6.053	5.479	1.10476	2.719	877	R6
								29_000_2	6.27	4.569	1.37229	3.352	878	R6
								29_000_3	5.759	5.08	1.13366	2.935	879	R6
								29_000_4	5.759	5.08	1.13366	2.783	880	R6
								29_000_5	5.322	5.275	1.00891	5.117	881	R6
								29_000_6	5.322	5.275	1.00891	3.115	882	R6
								29_000_7	5.651	4.81	1.17484	2.051	883	R6
								29_000_8	5.651	4.81	1.17484	2.323	884	R6
								29_000_9	6.346	5.084	1.24823	2.481	885	R6
								29_000_10	5.554	5.706	0.973361	3.978	886	R6
								29_000_11	6.523	6.312	1.03343	2.893	887	R6
								29_000_12	6.523	6.312	1.03343	4.469	888	R6
								29_000_13	4.88	5.864	0.832196	3.905	889	R6
								29_000_14	4.88	5.864	0.832196	3.211	890	R6
								11_1	5.166	4.747	1.08827	3.786	891	R6
								11_2	5.329	4.872	1.0938	3.279	892	R6
								11_3	4.319	5.174	0.834751	3.105	893	R6
								11_4	5.632	4.39	1.28292	3.02	894	R6
								11_5	4.759	5.617	0.847249	3.107	895	R6
								11_6	4.759	5.617	0.847249	3.419	896	R6
								11_7	4.574	5.269	0.868096	3.979	897	R6
								11_8	4.574	5.269	0.868096	3.333	898	R6
								11_9	4.93	5.67	0.869489	3.264	899	R6
								11_10	4.93	5.67	0.869489	3.069	900	R6
								11_11	5.771	5.362	1.07628	3.228	901	R6
								11_12	5.771	5.362	1.07628	2.522	902	R6
								01_000_1	5.469	6.057	0.902922	3.13	903	R6
								01_000_2	5.967	5.394	1.10623	3.541	904	R6
								01_000_3	5.605	5.289	1.05975	2.981	905	R6
								01_000_4	6.351	5.243	1.21133	3.927	906	R6
								01_000_5	6.351	5.243	1.21133	3.244	907	R6
								01_000_6	5.997	5.907	1.01524	3.173	908	R6
								01_000_7	5.997	5.907	1.01524	3.469	909	R6
								01_000_8	6.35	6.035	1.0522	3.197	910	R6
								30_1	5.825	5.763	1.01076	2.979	911	R6
								30_2	5.825	5.763	1.01076	3.385	912	R6
								30_3	6.018	6.004	1.00233	2.855	913	R6
								30_4	4.999	6.157	0.811921	2.799	914	R6
								30_5	5.335	6.145	0.868186	2.126	915	R6
								31_1	5.813	4.93	1.17911	3.669	916	R6
								31_2	5.296	5.556	0.953204	4.684	917	R6
								31_3	5.543	5.268	1.0522	4.98	918	R6
								31_4	5.543	5.268	1.0522	3.371	919	R6
								31_5	5.251	5.406	0.971328	3.503	920	R6
								31_6	5.251	5.406	0.971328	3.165	921	R6
								31_7	4.187	5.853	0.71536	3.293	922	R6
								31_8	4.373	5.726	0.763709	2.982	923	R6
								31_9	4.494	6.057	0.741951	3.373	924	R6
								31_10	4.494	6.057	0.741951	3.889	925	R6
								32_1	6.012	4.638	1.29625	2.965	926	R6
								32_2	6.145	5.559	1.10542	2.02	927	R6
								32_3	5.203	5.386	0.966023	3.905	928	R6
								32_4	6.454	5.348	1.20681	2.562	929	R6
								33_1	6.048	5.028	1.20286	3.885	930	R6
								33_2	6.048	5.028	1.20286	3.236	931	R6
								33_3	4.964	5.04	0.984921	3.06	932	R6
								33_4	4.964	5.04	0.984921	2.151	933	R6
								33_5	5.981	6.544	0.913967	3.407	934	R6
								33_6	5.981	6.544	0.913967	4.602	935	R6
								35_1	5.394	5.881	0.917191	4.52	936	R6
								35_2	5.394	5.881	0.917191	3.498	937	R6
								35_3	6.322	5.636	1.12172	3.684	938	R6
								35_4	6.322	5.636	1.12172	4.829	939	R6

## Sheet: 4F_TAN1-localization
Quantification of right and wrong cortical division sites in WT, bdpolar-1 and bdpan1-1. Right: R；Wrong: W.
genotype	location	number		Image	TAN1 in WT	number		Image	TAN1 in bdpan1-1	number		Image	TAN1 in bdpolar-1	number
WT	Right	33		image02-1	R	1		image03	R	1		2nd image001	R	1
WT	Wrong	0		image03-1	R	2		image04	R	2		2nd image002	R	2
pan1	Right	37		image03-2	R	3		image05-1	R	3		2nd image003	W	3
pan1	Wrong	3		image08 crop1-2	R	4		image05-2	R	4		3rd image004 crop1	R	4
polar	Right	19		image08 crop1-3	R	5		image06	R	5		3rd image004 crop2	R	5
polar	Wrong	13		image08 crop2-1	R	6		image16-crop1-1	R	6		3rd image005 crop1	R	6
				image08 crop2-2	R	7		image16-crop1-3	W	7		3rd image005 crop2	W	7
				image12 crop1-1	R	8		image16-crop2-1	R	8		3rd image005 crop2	W	8
				image12 crop1-2	R	9		image16-crop2-2	R	9		3rd image005 crop3	R	9
				image12 crop1-3	R	10		image17-crop1-1	R	10		3rd image005 crop3	R	10
				image12 crop2-1	R	11		image17-crop1-2	R	11		3rd image007 crop1	W	11
				image12 crop2-2	R	12		image17-crop1-3	R	12		3rd image008	R	12
				image13 crop1-1	R	13		image17-crop2-1	W	13		3rd image008	R	13
				image13 crop1-2	R	14		image17-crop2-3	R	14		image01 crop	R	14
				image13 crop2-2	R	15		image18-1	R	15		image02 crop	R	15
				image18 crop1-2	R	16		image18-2	R	16		image03 crop1	R	16
				image18 crop2-1	R	17		image18-3	R	17		image03 crop2	R	17
				image19 crop1-1	R	18		image19	R	18		image01	R	18
				image19 crop3-1	R	19		image24	R	19		image01	R	19
				image19 crop3-2	R	20		image25	R	20		image01	W	20
				image20 crop1-1	R	21		image31-1	R	21		image01	W	21
				image20 crop1-2	R	22		image31-2	R	22		image03	R	22
				image24 crop1-1	R	23		image37-crop1	R	23		image03	W	23
				image24 crop2-1	R	24		image37-crop2	R	24		image03	W	24
				image24 crop3-1	R	25		image38-crop1-1	R	25		image04 crop1	R	25
				image25 crop2-1	R	26		image38-crop1-2	R	26		image04 crop1	W	26
				image25 crop2-2	R	27		image39	R	27		image04 crop2	R	27
				image32 crop1-1	R	28		image43	R	28		image04 crop2	W	28
				image34 crop1-1	R	29		image50-1	R	29		image 06 crop	W	29
				image34 crop1-2	R	30		image50-2	R	30		image 06 crop2	R	30
				image34 crop2-1	R	31		image51-2	R	31		image 06 crop2	W	31
				image34 crop3-1	R	32		image51-3	R	32		image08	W	32
				image35 crop1-1	R	33		image52-2	W	33
								image53	R	34
								image54-1	R	35
								image54-2	R	36
								image55-1	R	37
								image55-2	R	38
								image56	R	39
								stage30	R	40

## Sheet: 4I_BdPOLAR-mVenus
Quantification of grey value (Y) for cell outline tracing (X) of BdPOALR-mVenus reporter line, corresponding to Figure 4E, plotted were 4µm SMC outline before (white) and after (orange) the GMC (grey). The first 4 µm were taken by reversing the measurement, taking the first 4µm and reverseing these, hence the reversed X values in the raw data.
DZ193-3 #1 POME-2 crop2		DZ193-3 #5 POME crop1		DZ193-3 #5 POME crop2		DZ193-3 #6 POME		DZ193-3 #7 POME		DZ193-4 #6 POME crop1		DZ193-4 #6 POME crop2		DZ193-4 #6 POME crop3							POLAR pre GC					POLAR pre GC normalized
X	Y	X	Y	X	Y	X	Y	X	Y	X	Y	X	Y	X	Y	x-axis	averages	std dev	std err		x-axis	averages	std dev	std err		x-axis	averages	std dev	std err
3.9683	114.401	3.9683	89.277	3.9683	67.673	3.9683	95.149	3.9683	171.106	3.9683	101.526	3.9683	201.021	3.9683	132.743	0	121.612	41.8181	14.7849		0	121.612	41.8181	14.7849		0	1	0.34	0.07
3.8781	95.253	3.8781	101.116	3.8781	56.905	3.8781	94.744	3.8781	178.351	3.8781	107.095	3.8781	210.349	3.8781	124.693	0.0902	121.063	46.5499	16.4579		0.0902	121.063	46.5499	16.4579		0.0902	1	0.38	0.08
3.7879	101.724	3.7879	93.74	3.7879	63.51	3.7879	82.184	3.7879	192.095	3.7879	81.369	3.7879	161.68	3.7879	131.89	0.1804	113.524	41.6502	14.7256		0.1804	113.524	41.6502	14.7256		0.1804	0.93	0.34	0.07
3.6977	112.739	3.6977	85.69	3.6977	64.016	3.6977	77.771	3.6977	191.371	3.6977	69.16	3.6977	186.004	3.6977	143.363	0.2706	116.264	48.2398	17.0553		0.2706	116.264	48.2398	17.0553		0.2706	0.96	0.4	0.08
3.6075	114.75	3.6075	80.464	3.6075	80.795	3.6075	82.468	3.6075	205.834	3.6075	101.88	3.6075	197.491	3.6075	115.78	0.3608	122.433	47.7067	16.8669		0.3608	122.433	47.7067	16.8669		0.3608	1.01	0.39	0.08
3.5173	110.987	3.5173	60.12	3.5173	72.413	3.5173	98.338	3.5173	215.848	3.5173	92	3.5173	157.595	3.5173	117.463	0.4509	115.596	46.9522	16.6001		0.4509	115.596	46.9522	16.6001		0.4509	0.95	0.39	0.08
3.4271	100.069	3.4271	60.636	3.4271	52.888	3.4271	86.08	3.4271	187.832	3.4271	84.48	3.4271	151.017	3.4271	117.787	0.5411	105.099	42.7629	15.119		0.5411	105.099	42.7629	15.119		0.5411	0.86	0.35	0.07
3.3369	91.193	3.3369	75.791	3.3369	56.815	3.3369	92.629	3.3369	207.819	3.3369	87.04	3.3369	137.542	3.3369	119.747	0.6313	108.572	44.1409	15.6062		0.6313	108.572	44.1409	15.6062		0.6313	0.89	0.36	0.08
3.2468	91.504	3.2468	67.596	3.2468	54.163	3.2468	89.824	3.2468	203.509	3.2468	62.92	3.2468	117.781	3.2468	107.561	0.7215	99.3572	44.4211	15.7052		0.7215	99.3572	44.4211	15.7052		0.7215	0.82	0.37	0.08
3.1566	103.692	3.1566	68.763	3.1566	48.416	3.1566	86.918	3.1566	185.001	3.1566	73.24	3.1566	123.705	3.1566	135.029	0.8117	103.096	41.0411	14.5102		0.8117	103.096	41.0411	14.5102		0.8117	0.85	0.34	0.07
3.0664	90.932	3.0664	77.364	3.0664	46.025	3.0664	104.989	3.0664	159.131	3.0664	67.6	3.0664	141.469	3.0664	129.21	0.9019	102.09	36.4297	12.8799		0.9019	102.09	36.4297	12.8799		0.9019	0.84	0.3	0.07
2.9762	78.835	2.9762	80.82	2.9762	41.513	2.9762	98.2	2.9762	165.749	2.9762	67.04	2.9762	117.276	2.9762	124.268	0.9921	96.7126	36.1421	12.7782		0.9921	96.7126	36.1421	12.7782		0.9921	0.8	0.3	0.07
2.886	80.287	2.886	73.347	2.886	32.902	2.886	105.078	2.886	162.189	2.886	59.64	2.886	145.602	2.886	129.623	1.0823	98.5835	41.929	14.8241		1.0823	98.5835	41.929	14.8241		1.0823	0.81	0.34	0.07
2.7958	87.644	2.7958	64.736	2.7958	31.557	2.7958	92.456	2.7958	164.318	2.7958	59.28	2.7958	118.859	2.7958	124.819	1.1724	92.9586	39.5403	13.9796		1.1724	92.9586	39.5403	13.9796		1.1724	0.76	0.33	0.07
2.7056	81.019	2.7056	56.387	2.7056	25.835	2.7056	96.358	2.7056	160.37	2.7056	56.2	2.7056	123.936	2.7056	83.013	1.2626	85.3898	39.5172	13.9714		1.2626	85.3898	39.5172	13.9714		1.2626	0.7	0.32	0.07
2.6154	84.675	2.6154	49.899	2.6154	22.79	2.6154	80.455	2.6154	167.884	2.6154	41.32	2.6154	128.534	2.6154	109.069	1.3528	85.5782	45.2389	15.9944		1.3528	85.5782	45.2389	15.9944		1.3528	0.7	0.37	0.08
2.5253	73.617	2.5253	44.186	2.5253	30.756	2.5253	69.883	2.5253	171.313	2.5253	42.32	2.5253	117.795	2.5253	96.311	1.443	80.7726	43.7297	15.4608		1.443	80.7726	43.7297	15.4608		1.443	0.66	0.36	0.07
2.4351	63.253	2.4351	44.619	2.4351	33.566	2.4351	64.448	2.4351	171.834	2.4351	47.04	2.4351	124.738	2.4351	92.243	1.5332	80.2176	44.1604	15.613		1.5332	80.2176	44.1604	15.613		1.5332	0.66	0.36	0.08
2.3449	33.846	2.3449	36.552	2.3449	23.8	2.3449	92.621	2.3449	164.418	2.3449	53.32	2.3449	113.519	2.3449	66.243	1.6234	73.0399	44.8596	15.8603		1.6234	73.0399	44.8596	15.8603		1.6234	0.6	0.37	0.08
2.2547	58.256	2.2547	36.459	2.2547	25.677	2.2547	56.818	2.2547	149.094	2.2547	29.92	2.2547	91.026	2.2547	53.186	1.7136	62.5545	37.9882	13.4308		1.7136	62.5545	37.9882	13.4308		1.7136	0.51	0.31	0.07
2.1645	38.091	2.1645	34.641	2.1645	18.217	2.1645	83.899	2.1645	144.184	2.1645	28.84	2.1645	94.769	2.1645	48.249	1.8038	61.3612	40.047	14.1588		1.8038	61.3612	40.047	14.1588		1.8038	0.5	0.33	0.07
2.0743	42.277	2.0743	29.033	2.0743	18.321	2.0743	72.856	2.0743	128.841	2.0743	35.789	2.0743	98.335	2.0743	50.259	1.8939	59.4639	35.4663	12.5392		1.8939	59.4639	35.4663	12.5392		1.8939	0.49	0.29	0.07
1.9841	39.991	1.9841	38.805	1.9841	23.308	1.9841	72.148	1.9841	122.235	1.9841	35.835	1.9841	102.282	1.9841	44.049	1.9841	59.8316	33.2464	11.7544		1.9841	59.8316	33.2464	11.7544		1.9841	0.49	0.27	0.07
1.8939	31.127	1.8939	22.077	1.8939	23.316	1.8939	73.514	1.8939	124.899	1.8939	23.896	1.8939	103.067	1.8939	26.088	2.0743	53.498	38.701	13.6829		2.0743	53.498	38.701	13.6829		2.0743	0.44	0.32	0.07
1.8038	35.044	1.8038	27.941	1.8038	30.837	1.8038	78.5	1.8038	125.125	1.8038	24.107	1.8038	94.519	1.8038	30.786	2.1645	55.8574	35.848	12.6742		2.1645	55.8574	35.848	12.6742		2.1645	0.46	0.29	0.07
1.7136	48.031	1.7136	24.275	1.7136	37.901	1.7136	58.68	1.7136	98.241	1.7136	32.956	1.7136	114.808	1.7136	28.61	2.2547	55.4378	31.4764	11.1286		2.2547	55.4378	31.4764	11.1286		2.2547	0.46	0.26	0.06
1.6234	34.281	1.6234	28.724	1.6234	31.41	1.6234	75.151	1.6234	79.339	1.6234	30.075	1.6234	120.229	1.6234	24.908	2.3449	53.0146	32.4513	11.4733		2.3449	53.0146	32.4513	11.4733		2.3449	0.44	0.27	0.06
1.5332	37.55	1.5332	36.36	1.5332	23.711	1.5332	79.071	1.5332	77.122	1.5332	31.89	1.5332	111.964	1.5332	35.141	2.4351	54.1011	29.2973	10.3581		2.4351	54.1011	29.2973	10.3581		2.4351	0.44	0.24	0.06
1.443	44.274	1.443	27.846	1.443	27.054	1.443	67.862	1.443	61.797	1.443	26.044	1.443	101.409	1.443	37.752	2.5253	49.2548	24.6746	8.72377		2.5253	49.2548	24.6746	8.72377		2.5253	0.41	0.2	0.06
1.3528	49.296	1.3528	36.804	1.3528	31.271	1.3528	58.384	1.3528	60.293	1.3528	32.281	1.3528	93.754	1.3528	40.104	2.6154	50.2734	19.453	6.87767		2.6154	50.2734	19.453	6.87767		2.6154	0.41	0.16	0.05
1.2626	33.238	1.2626	52.626	1.2626	33.545	1.2626	58.803	1.2626	47.29	1.2626	22.326	1.2626	106.874	1.2626	34.005	2.7056	48.5884	24.708	8.73558		2.7056	48.5884	24.708	8.73558		2.7056	0.4	0.2	0.06
1.1724	34.141	1.1724	45.678	1.1724	34.837	1.1724	51.01	1.1724	57.332	1.1724	34.33	1.1724	81.342	1.1724	31.147	2.7958	46.2271	15.9072	5.62404		2.7958	46.2271	15.9072	5.62404		2.7958	0.38	0.13	0.05
1.0823	40.18	1.0823	54.775	1.0823	42.583	1.0823	49.303	1.0823	71.459	1.0823	39.412	1.0823	95.27	1.0823	42.906	2.886	54.486	18.3236	6.47836		2.886	54.486	18.3236	6.47836		2.886	0.45	0.15	0.05
0.9921	42.913	0.9921	45.557	0.9921	45.234	0.9921	69.543	0.9921	69.892	0.9921	28.541	0.9921	122.438	0.9921	34.693	2.9762	57.3514	28.2401	9.98438		2.9762	57.3514	28.2401	9.98438		2.9762	0.47	0.23	0.06
0.9019	42	0.9019	64.426	0.9019	46.03	0.9019	66.726	0.9019	71.171	0.9019	38.468	0.9019	113.522	0.9019	42.797	3.0664	60.6425	23.2638	8.22501		3.0664	60.6425	23.2638	8.22501		3.0664	0.5	0.19	0.05
0.8117	52.927	0.8117	67.735	0.8117	63.277	0.8117	65.563	0.8117	69.766	0.8117	44.042	0.8117	166.676	0.8117	53.965	3.1566	72.9939	36.3439	12.8495		3.1566	72.9939	36.3439	12.8495		3.1566	0.6	0.3	0.07
0.7215	84.371	0.7215	70.915	0.7215	51.215	0.7215	76.947	0.7215	85.91	0.7215	46.274	0.7215	178.923	0.7215	45.575	3.2468	80.0162	40.4394	14.2975		3.2468	80.0162	40.4394	14.2975		3.2468	0.66	0.33	0.07
0.6313	100.676	0.6313	64.246	0.6313	47.181	0.6313	66.143	0.6313	118.085	0.6313	38.633	0.6313	167.835	0.6313	35.186	3.3369	79.7481	43.0541	15.2219		3.3369	79.7481	43.0541	15.2219		3.3369	0.66	0.35	0.07
0.5411	99.942	0.5411	56.274	0.5411	45.445	0.5411	71.025	0.5411	119.939	0.5411	38.719	0.5411	185.918	0.5411	46.825	3.4271	83.0109	47.1449	16.6682		3.4271	83.0109	47.1449	16.6682		3.4271	0.68	0.39	0.08
0.4509	91.01	0.4509	74.439	0.4509	62.593	0.4509	76.539	0.4509	134.625	0.4509	31.751	0.4509	189.392	0.4509	39.987	3.5173	87.542	48.5947	17.1808		3.5173	87.542	48.5947	17.1808		3.5173	0.72	0.4	0.08
0.3608	91.169	0.3608	79.221	0.3608	46.644	0.3608	67.791	0.3608	106.37	0.3608	32.696	0.3608	192.806	0.3608	36.634	3.6075	81.6664	48.6103	17.1863		3.6075	81.6664	48.6103	17.1863		3.6075	0.67	0.4	0.08
0.2706	81.426	0.2706	81.826	0.2706	55.866	0.2706	53.643	0.2706	107.04	0.2706	35.71	0.2706	196.609	0.2706	36.186	3.6977	81.0383	49.3508	17.4481		3.6977	81.0383	49.3508	17.4481		3.6977	0.67	0.41	0.08
0.1804	73.973	0.1804	67.463	0.1804	72.95	0.1804	64.521	0.1804	119.451	0.1804	39.177	0.1804	193.597	0.1804	38.309	3.7879	83.6801	47.749	16.8818		3.7879	83.6801	47.749	16.8818		3.7879	0.69	0.39	0.08
0.0902	89.417	0.0902	46.755	0.0902	61.217	0.0902	71.278	0.0902	119.705	0.0902	34.204	0.0902	174.898	0.0902	44.496	3.8781	80.2463	44.1053	15.5936		3.8781	80.2463	44.1053	15.5936		3.8781	0.66	0.36	0.08
0	84	0	44	0	66	0	71	0	126	0	33	0	133	0	62	3.9683	77.375	33.5259	11.8532		3.9683	77.375	33.5259	11.8532		3.9683	0.64	0.28	0.07
0	110.287	0	59.494	0	63.828	0	69.88	0	124.46	0	35.106	0	159.75	0	40.96	4.0584	82.9706	41.0906	14.5277
0.0902	108.876	0.0902	70.127	0.0902	64.032	0.0902	82.48	0.0902	105.346	0.0902	45.446	0.0902	177.95	0.0902	49.72	4.1486	87.9971	40.3551	14.2677
0.1804	110.31	0.1804	78.825	0.1804	53.367	0.1804	58.8	0.1804	126.663	0.1804	39.573	0.1804	205.3	0.1804	34.74	4.2388	88.4472	53.6986	18.9853
0.2706	90.398	0.2706	75.434	0.2706	65.147	0.2706	74.56	0.2706	121.093	0.2706	31.593	0.2706	152.75	0.2706	47.56	4.329	82.3169	36.5941	12.938
0.3608	82.75	0.3608	74.49	0.3608	48.02	0.3608	62.84	0.3608	114.358	0.3608	30.594	0.3608	133	0.3608	46	4.4192	74.0065	32.8903	11.6285
0.4509	77.385	0.4509	73.207	0.4509	42.578	0.4509	61.2	0.4509	119.732	0.4509	43.285	0.4509	162.85	0.4509	47.54	4.5094	78.4721	39.7375	14.0493
0.5411	72.023	0.5411	72.683	0.5411	50.012	0.5411	59.88	0.5411	126.236	0.5411	34.497	0.5411	161.25	0.5411	49.04	4.5996	78.2026	40.5644	14.3417		POLAR post GC					POLAR postGC normalized
0.6313	65.221	0.6313	69.004	0.6313	48.985	0.6313	66.52	0.6313	109.719	0.6313	42.559	0.6313	151.85	0.6313	36.98	4.6898	73.8547	36.1923	12.7959		x-axis	averages	std dev	std err		x-axis	averages	std dev	std err
0.7215	71.175	0.7215	65.437	0.7215	43.248	0.7215	54	0.7215	102.355	0.7215	27.01	0.7215	154.1	0.7215	44	4.7799	70.1656	38.1403	13.4846		0	65.5155	51.4329	18.1843		0	0.44	0.34	0.07
0.8117	88.532	0.8117	48.924	0.8117	46.683	0.8117	43.28	0.8117	105.57	0.8117	39.344	0.8117	148	0.8117	44	4.8701	70.5416	37.0944	13.1148		0.0902	62.475	53.1577	18.7941		0.0902	0.42	0.36	0.07
0.9019	90.322	0.9019	53.4	0.9019	49.253	0.9019	44.72	0.9019	101.302	0.9019	37.08	0.9019	119.95	0.9019	45.54	4.9603	67.6959	29.3096	10.3625		0.1804	65.514	50.8885	17.9918		0.1804	0.44	0.34	0.07
0.9921	87.05	0.9921	48.334	0.9921	40.16	0.9921	43.28	0.9921	100.628	0.9921	37.778	0.9921	121.95	0.9921	47.92	5.0505	65.8875	30.3971	10.747		0.2706	64.6509	45.968	16.2521		0.2706	0.43	0.31	0.07
1.0823	90.032	1.0823	49.881	1.0823	36.532	1.0823	43.36	1.0823	105.7	1.0823	30.57	1.0823	129.15	1.0823	36.12	5.1407	65.1681	35.2223	12.453		0.3608	65.6776	48.3261	17.0859		0.3608	0.44	0.32	0.07
1.1724	87.171	1.1724	54.382	1.1724	26.729	1.1724	42.64	1.1724	130.987	1.1724	37.323	1.1724	121.95	1.1724	34.32	5.2309	66.9377	38.4769	13.6036		0.4509	65.9433	53.0525	18.7569		0.4509	0.44	0.36	0.07
1.2626	77.165	1.2626	51.953	1.2626	34.055	1.2626	32.48	1.2626	120.704	1.2626	45.176	1.2626	104	1.2626	39.22	5.3211	63.0941	31.5948	11.1704		0.5411	71.9797	55.1084	19.4838		0.5411	0.48	0.37	0.08
1.3528	71.991	1.3528	38.543	1.3528	25.44	1.3528	25.28	1.3528	88.462	1.3528	37.496	1.3528	106.9	1.3528	39.34	5.4113	54.1815	28.8881	10.2135		0.6313	63.2014	50.9786	18.0236		0.6313	0.42	0.34	0.07
1.443	69.506	1.443	37.119	1.443	27.413	1.443	42.36	1.443	85.864	1.443	24.225	1.443	106.9	1.443	37.44	5.5014	53.8534	28.156	9.95466		0.7215	61.5126	42.0376	14.8625		0.7215	0.41	0.28	0.07
1.5332	66.26	1.5332	34.874	1.5332	27.245	1.5332	35.36	1.5332	94.294	1.5332	25.607	1.5332	126.2	1.5332	39.66	5.5916	56.1875	34.2589	12.1123		0.8117	54.4014	39.1923	13.8566		0.8117	0.36	0.26	0.06
1.6234	68.255	1.6234	34.421	1.6234	20.613	1.6234	26.64	1.6234	90.482	1.6234	31.179	1.6234	126.888	1.6234	42.88	5.6818	55.1698	34.8692	12.3281		0.9019	61.7403	36.138	12.7767		0.9019	0.41	0.24	0.06
1.7136	63.856	1.7136	36.131	1.7136	20.941	1.7136	39.6	1.7136	103.219	1.7136	28.294	1.7136	118.432	1.7136	40.72	5.772	56.3991	33.6931	11.9123		0.9921	61.2805	33.3953	11.807		0.9921	0.41	0.22	0.06
1.8038	59.701	1.8038	36.463	1.8038	27.61	1.8038	43.28	1.8038	91.835	1.8038	29.038	1.8038	128.979	1.8038	25.3	5.8622	55.2758	34.7104	12.272		1.0823	57.7223	28.1668	9.95848		1.0823	0.39	0.19	0.05
1.8939	71.385	1.8939	28.891	1.8939	19.719	1.8939	28.4	1.8939	75.041	1.8939	23.856	1.8939	116.682	1.8939	37	5.9524	50.1217	32.0397	11.3277		1.1724	59.313	27.9993	9.89925		1.1724	0.4	0.19	0.05
1.9841	59.342	1.9841	25.924	1.9841	21.332	1.9841	29.48	1.9841	70.238	1.9841	22.271	1.9841	92.823	1.9841	34.14	6.0426	44.4438	24.8161	8.77381		1.2626	68.6972	34.7905	12.3003		1.2626	0.46	0.23	0.06
2.0743	41.77	2.0743	22.944	2.0743	17.49	2.0743	18.04	2.0743	69.766	2.0743	19.792	2.0743	94.801	2.0743	28.84	6.1328	39.1804	26.6919	9.43703		1.3528	68.5345	30.5348	10.7957		1.3528	0.46	0.2	0.06
2.1645	50.906	2.1645	20.8	2.1645	19.123	2.1645	36.16	2.1645	73.204	2.1645	29.439	2.1645	101.072	2.1645	44.02	6.2229	46.8405	26.277	9.29031		1.443	62.5339	24.6761	8.7243		1.443	0.42	0.17	0.05
2.2547	57	2.2547	22.308	2.2547	19.584	2.2547	39.16	2.2547	80.291	2.2547	31.643	2.2547	98.762	2.2547	38.1	6.3131	48.356	26.4828	9.3631		1.5332	73.5086	26.0581	9.21291		1.5332	0.49	0.17	0.05
2.3449	57.23	2.3449	31.118	2.3449	10.355	2.3449	41.12	2.3449	76.416	2.3449	27.218	2.3449	90.878	2.3449	38.04	6.4033	46.5469	24.9872	8.8343		1.6234	71.6645	28.0646	9.92233		1.6234	0.48	0.19	0.05
2.4351	52.728	2.4351	35.909	2.4351	14.81	2.4351	27	2.4351	72.314	2.4351	31.826	2.4351	91.979	2.4351	31.7	6.4935	44.7833	24.1892	8.55219		1.7136	74.9475	20.9979	7.42387		1.7136	0.5	0.14	0.05
2.5253	55.708	2.5253	26.138	2.5253	10.201	2.5253	29.88	2.5253	86.687	2.5253	30.585	2.5253	90.238	2.5253	59	6.5837	48.5546	27.3793	9.68005		1.8038	83.4924	14.7211	5.20469		1.8038	0.56	0.1	0.04
2.6154	61.423	2.6154	27.63	2.6154	14.831	2.6154	32.28	2.6154	83.862	2.6154	25.295	2.6154	104.821	2.6154	58.12	6.6739	51.0328	29.5835	10.4594		1.8939	90.7569	17.4249	6.16063		1.8939	0.61	0.12	0.04
2.7056	52.957	2.7056	27.918	2.7056	16.462	2.7056	36.44	2.7056	77.781	2.7056	24.644	2.7056	102.509	2.7056	56.98	6.7641	49.4614	27.4393	9.70127		1.9841	99.8294	24.6868	8.7281		1.9841	0.67	0.17	0.05
2.7958	51.577	2.7958	25.723	2.7958	25.78	2.7958	36.28	2.7958	69.976	2.7958	30.191	2.7958	99.576	2.7958	64	6.8543	50.3879	24.5222	8.66992		2.0743	92.6301	21.9486	7.75999		2.0743	0.62	0.15	0.05
2.886	52.538	2.886	26.783	2.886	16.045	2.886	43.84	2.886	80.722	2.886	33.689	2.886	92.662	2.886	62.9	6.9444	51.1474	24.8047	8.76977		2.1645	99.8149	27.4889	9.7188		2.1645	0.67	0.18	0.05
2.9762	54.096	2.9762	22.82	2.9762	20.921	2.9762	43.92	2.9762	75.736	2.9762	31.462	2.9762	86.69	2.9762	57.24	7.0346	49.1106	22.462	7.94151		2.2547	99.2592	38.3601	13.5623		2.2547	0.66	0.26	0.06
3.0664	57.89	3.0664	22.873	3.0664	14.328	3.0664	46.08	3.0664	64.026	3.0664	34.643	3.0664	89.962	3.0664	51.88	7.1248	47.7103	22.5752	7.98152		2.3449	97.5018	40.4768	14.3107		2.3449	0.65	0.27	0.07
3.1566	57.734	3.1566	24.038	3.1566	13.7	3.1566	54.12	3.1566	73.902	3.1566	43.45	3.1566	97.322	3.1566	55.88	7.215	52.5183	24.7637	8.75529		2.4351	102.696	42.5329	15.0376		2.4351	0.69	0.28	0.07
3.2468	49.781	3.2468	20.674	3.2468	11.285	3.2468	54.28	3.2468	87.344	3.2468	41.825	3.2468	108.953	3.2468	59.66	7.3052	54.2253	30.1343	10.6541		2.5253	106.789	44.1442	15.6073		2.5253	0.71	0.3	0.07
3.3369	47.089	3.3369	20.252	3.3369	13.121	3.3369	49.6	3.3369	82.581	3.3369	50.531	3.3369	106.757	3.3369	66.84	7.3954	54.5964	28.8344	10.1945		2.6154	107.185	49.9748	17.6688		2.6154	0.72	0.33	0.07
3.4271	53.161	3.4271	17.694	3.4271	13.866	3.4271	48	3.4271	81.326	3.4271	40.423	3.4271	122.791	3.4271	82.9	7.4856	57.5201	34.2142	12.0965		2.7056	105.759	49.3698	17.4549		2.7056	0.71	0.33	0.07
3.5173	50.977	3.5173	17.873	3.5173	15.296	3.5173	41.88	3.5173	75.521	3.5173	53.035	3.5173	142.444	3.5173	74.6	7.5758	58.9532	37.871	13.3894		2.7958	104.696	52.3077	18.4935		2.7958	0.7	0.35	0.07
3.6075	51.06	3.6075	17.124	3.6075	23.826	3.6075	58.72	3.6075	77.616	3.6075	58.407	3.6075	135.615	3.6075	57.24	7.6659	59.951	34.0341	12.0329		2.886	114.672	54.7697	19.364		2.886	0.77	0.37	0.08
3.6977	55.554	3.6977	17.636	3.6977	17.466	3.6977	51.68	3.6977	85.644	3.6977	50.696	3.6977	121.532	3.6977	49.9	7.7561	56.2635	32.042	11.3286		2.9762	113.268	58.7541	20.7727		2.9762	0.76	0.39	0.08
3.7879	54.603	3.7879	20.117	3.7879	16.47	3.7879	50.12	3.7879	87.282	3.7879	40.83	3.7879	130.212	3.7879	47.54	7.8463	55.8967	34.7749	12.2948		3.0664	109.301	57.5987	20.3642		3.0664	0.73	0.39	0.08
3.8781	49.989	3.8781	22.234	3.8781	18.277	3.8781	65.24	3.8781	78.71	3.8781	54.365	3.8781	133.853	3.8781	52.56	7.9365	59.4035	33.8809	11.9787		3.1566	114.177	54.6677	19.3279		3.1566	0.76	0.37	0.08
3.9683	55.641	3.9683	22.389	3.9683	10.023	3.9683	61.48	3.9683	89.439	3.9683	45.414	3.9683	137.45	3.9683	51.44	8.0267	59.1595	37.2139	13.1571		3.2468	120.462	57.4499	20.3116		3.2468	0.81	0.38	0.08
4.0584	55.294	4.0584	23.237	4.0584	23.826	4.0584	61.76	4.0584	97.597	4.0584	40.655	4.0584	167.73	4.0584	51.46	8.1169	65.1949	44.6317	15.7797		3.3369	112.459	60.8125	21.5004		3.3369	0.75	0.41	0.08
4.1486	44.766	4.1486	30.285	4.1486	25.634	4.1486	71.48	4.1486	98.245	4.1486	44.5	4.1486	155.865	4.1486	47.1	8.2071	64.7344	40.786	14.42		3.4271	113.098	61.2625	21.6596		3.4271	0.76	0.41	0.08
4.2388	51.827	4.2388	24.872	4.2388	26.814	4.2388	62.76	4.2388	96.354	4.2388	50.055	4.2388	133.427	4.2388	46.6	8.2973	61.5886	34.2438	12.107		3.5173	119.962	55.7091	19.6961		3.5173	0.8	0.37	0.08
4.329	61.853	4.329	18.93	4.329	29.551	4.329	55.006	4.329	114.672	4.329	41.272	4.329	144.704	4.329	39.14	8.3874	63.141	41.099	14.5307		3.6075	122.166	53.8044	19.0227		3.6075	0.82	0.36	0.08
4.4192	67.156	4.4192	25.524	4.4192	17.043	4.4192	61.791	4.4192	117.967	4.4192	38.161	4.4192	169.906	4.4192	62.28	8.4776	69.9785	47.7145	16.8696		3.6977	122.793	55.254	19.5353		3.6977	0.82	0.37	0.08
4.5094	67.916	4.5094	27.646	4.5094	29.36	4.5094	61.623	4.5094	100.296	4.5094	34.841	4.5094	151.833	4.5094	39.58	8.5678	64.1369	40.3438	14.2637		3.7879	124.599	51.941	18.3639		3.7879	0.83	0.35	0.07
4.5996	77.15	4.5996	26.243	4.5996	29.142	4.5996	61.351	4.5996	109.737	4.5996	41.96	4.5996	129.991	4.5996	35.234	8.658	63.851	36.3668	12.8576		3.8781	126.004	50.2024	17.7492		3.8781	0.84	0.34	0.07
4.6898	78.199	4.6898	26.543	4.6898	19.061	4.6898	61.274	4.6898	114.648	4.6898	35.182	4.6898	152.455	4.6898	47.012	8.7482	66.7968	43.4131	15.3489		3.9683	149.395	56.3934	32.5587		3.9683	1	0.38	0.08
4.7799	70.267	4.7799	24.589	4.7799	23.957	4.7799	62.928	4.7799	106.977	4.7799	34.569	4.7799	167.908	4.7799	45.969	8.8384	67.1455	46.0341	16.2755
4.8701	74.669	4.8701	25.57	4.8701	26.613	4.8701	50.919	4.8701	135.635	4.8701	41.303	4.8701	193.628	4.8701	35.605	8.9286	72.9928	56.755	20.0659
4.9603	73.452	4.9603	28.564	4.9603	26.302	4.9603	49.867	4.9603	125.896	4.9603	35.802	4.9603	195.816	4.9603	44.274	9.0188	72.4966	55.6543	19.6768
5.0505	71.942	5.0505	34.9	5.0505	23.777	5.0505	46.106	5.0505	131.207	5.0505	40.367	5.0505	219.558	5.0505	37.767	9.1089	75.703	62.9623	22.2605
5.1407	75.108	5.1407	35.733	5.1407	18.829	5.1407	47.27	5.1407	141.315	5.1407	33.699	5.1407	227.788	5.1407	56.203	9.1991	79.4931	66.2434	23.4206
5.2309	76.372	5.2309	46.498	5.2309	33.463	5.2309	45.401	5.2309	138.188	5.2309	33.733	5.2309	185.311	5.2309	51.759	9.2893	76.3406	52.2083	18.4584
5.3211	92.889	5.3211	56.088	5.3211	43.714	5.3211	46.135	5.3211	120.621	5.3211	27.222	5.3211	218.897	5.3211	54.552	9.3795	82.5148	58.6583	20.7388
5.4113	88.692	5.4113	49.666	5.4113	33.503	5.4113	42.785	5.4113	106.655	5.4113	34.763	5.4113	197.111	5.4113	49.864	9.4697	197.111	0	0
5.5014	89.55	5.5014	65.811	5.5014	27.223	5.5014	42.216	5.5014	88.184	5.5014	48.798	5.5014	198.377	5.5014	43.214	9.5599	96.4637	72.1137	41.6349
5.5916	89.89	5.5916	63.054	5.5916	24.202	5.5916	38.568	5.5916	74.697	5.5916	44.245	5.5916	190.67	5.5916	42.135	9.6501	91.161	70.4016	40.6464
5.6818	83.168	5.6818	49.904	5.6818	27.806	5.6818	48.018	5.6818	70.949	5.6818	40.98	5.6818	175.05	5.6818	46.607	9.7403	76.3208	50.4167	22.5471
5.772	83.793	5.772	40.235	5.772	39.668	5.772	29.615	5.772	73.1	5.772	70.274	5.772	184.308	5.772	48.606	9.8304	81.1806	52.9525	23.6811
5.8622	98.865	5.8622	51.242	5.8622	31.394	5.8622	43.062	5.8622	89.605	5.8622	82.038	5.8622	192.268	5.8622	45.327	9.9206	90.46	54.2588	24.2653
5.9524	103.226	5.9524	52.642	5.9524	25.473	5.9524	37.373	5.9524	83.186	5.9524	90.685	5.9524	202.615	5.9524	41.814	10.0108	91.1346	59.6894	26.6939
6.0426	96.482	6.0426	50.622	6.0426	33.55	6.0426	40.388	6.0426	66.322	6.0426	104.235	6.0426	182.248	6.0426	48.799	10.101	88.3984	51.8055	23.1681
6.1328	105.553	6.1328	42.467	6.1328	30.902	6.1328	43.935	6.1328	77.263	6.1328	96.19	6.1328	149.265	6.1328	49.416	10.1912	76.4227	37.9369	15.4877
6.2229	96.928	6.2229	40.583	6.2229	20.824	6.2229	53.437	6.2229	77.558	6.2229	94.643	6.2229	140.925	6.2229	49.629	10.2814	68.2284	37.1209	14.0304
6.3131	102.256	6.3131	56.956	6.3131	21.334	6.3131	40.906	6.3131	66.285	6.3131	85.211	6.3131	124.348	6.3131	47.271	10.3716	63.1873	31.1117	11.7591
6.4033	64.851	6.4033	57.6	6.4033	24.697	6.4033	53.854	6.4033	83.939	6.4033	116.447	6.4033	115.944	6.4033	30.692	10.4618	69.0247	34.7804	13.1458
6.4935	55.152	6.4935	47.666	6.4935	22.148	6.4935	63.732	6.4935	66.55	6.4935	103.128	6.4935	113.559	6.4935	26.744	10.5519	62.3349	30.529	10.7936
6.5837	34.987	6.5837	36.393	6.5837	17.415	6.5837	68.73	6.5837	67.968	6.5837	83.866	6.5837	110.233	6.5837	37.452	10.6421	57.1305	28.8782	10.21
6.6739	27.859	6.6739	39.632	6.6739	20.244	6.6739	73.202	6.6739	82.58	6.6739	87.928	6.6739	133.936	6.6739	35.805	10.7323	62.6482	36.2084	12.8016
6.7641	37.52	6.7641	24.18	6.7641	19.987	6.7641	82.422	6.7641	51.726	6.7641	94.412	6.7641	130.272	6.7641	37.554	10.8225	59.7591	36.3771	12.8613
6.8543	35.811	6.8543	25.611	6.8543	15.66	6.8543	79.873	6.8543	64.148	6.8543	89.133	6.8543	118.949	6.8543	40.312	10.9127	58.6871	33.248	11.7549
6.9444	23.904	6.9444	15.754	6.9444	17.632	6.9444	73.901	6.9444	85.035	6.9444	47.463	6.9444	134.772	6.9444	52.13	11.0029	56.3239	38.042	13.4499
7.0346	41.794	7.0346	33.865	7.0346	25.668	7.0346	72.726	7.0346	80.059	7.0346	81.342	7.0346	136.798	7.0346	46.057	11.0931	64.7886	33.7673	11.9386
7.1248	29.842	7.1248	31.079	7.1248	24.919	7.1248	77.342	7.1248	69.387	7.1248	75.647	7.1248	112.337	7.1248	49.586	11.1833	58.7674	28.3852	10.0357
7.215	36.882	7.215	38.225	7.215	22.815	7.215	81.877	7.215	79.018	7.215	100.241	7.215	106.996	7.215	56.336	11.2734	65.2987	29.2583	10.3444
7.3052	33.453	7.3052	28.64	7.3052	18.538	7.3052	87.313	7.3052	77.62	7.3052	96.465	7.3052	111.081	7.3052	55.447	11.3636	63.5696	32.252	11.4028
7.3954	35.069	7.3954	21.332	7.3954	26.031	7.3954	87.194	7.3954	63.762	7.3954	88.852	7.3954	98.2	7.3954	69.084	11.4538	61.1905	28.2559	9.98998
7.4856	35.161	7.4856	35.89	7.4856	31.123	7.4856	85.659	7.4856	75.226	7.4856	93.804	7.4856	113.252	7.4856	87.688	11.544	69.7254	29.3914	10.3914
7.5758	49.58	7.5758	55.104	7.5758	35.218	7.5758	90.303	7.5758	94.775	7.5758	105.55	7.5758	145.36	7.5758	82.865	11.6342	82.3444	33.0984	11.7021
7.6659	44.01	7.6659	50.843	7.6659	30.803	7.6659	90.246	7.6659	133.201	7.6659	105.749	7.6659	180.472	7.6659	68.551	11.7244	87.9844	47.2755	16.7144
7.7561	49.188	7.7561	46.397	7.7561	46.503	7.7561	80.612	7.7561	89.505	7.7561	92.745	7.7561	189.216	7.7561	68.458	11.8146	82.828	43.9476	15.5378
7.8463	51.774	7.8463	52.709	7.8463	39.729	7.8463	69.455	7.8463	94.964	7.8463	83.16	7.8463	197.411	7.8463	71.93	11.9048	82.6415	46.5067	16.4426
7.9365	55.078	7.9365	74.574	7.9365	46.985	7.9365	77.383	7.9365	71.024	7.9365	89.041	7.9365	208.529	7.9365	60.696	11.9949	85.4137	48.1762	17.0329
8.0267	66.529	8.0267	94.517	8.0267	54.672	8.0267	80.128	8.0267	79.734	8.0267	88.651	8.0267	225.401	8.0267	65.225	12.0851	94.3571	51.0139	18.0362
8.1169	64.336	8.1169	110.838	8.1169	53.399	8.1169	88.508	8.1169	89.786	8.1169	81.138	8.1169	220.035	8.1169	70.161	12.1753	97.2751	49.2349	17.4072
8.2071	72.585	8.2071	95.171	8.2071	69.662	8.2071	91.863	8.2071	108.311	8.2071	76.455	8.2071	229.171	8.2071	69.212	12.2655	101.554	49.9984	17.6771
8.2973	85.005	8.2973	96.307	8.2973	53.104	8.2973	80.227	8.2973	124.401	8.2973	78.14	8.2973	239.997	8.2973	71.223	12.3557	103.55	55.0323	19.4568
8.3874	113.372	8.3874	116.001	8.3874	58.158	8.3874	73.568	8.3874	128.322	8.3874	86.784	8.3874	240.664	8.3874	63.293	12.4459	110.02	54.9904	19.442
8.4776	138.72	8.4776	116.693	8.4776	63.068	8.4776	72.568	8.4776	123.805	8.4776	90.772	8.4776	237.952	8.4776	54.451	12.5361	112.254	55.2839	19.5458
8.5678	125.698	8.5678	115.243	8.5678	58.209	8.5678	76.903	8.5678	149.871	8.5678	79.87	8.5678	235.934	8.5678	64.773	12.6263	113.313	55.1886	19.5121
8.658	135.805	8.658	111.245	8.658	52.346	8.658	87.843	8.658	170.911	8.658	89.775	8.658	231.993	8.658	66.543	12.7164	118.308	55.7004	19.693
8.7482	129.456	8.7482	101.442	8.7482	59.163	8.7482	107.364	8.7482	154.393	8.7482	98.013	8.7482	235.606	8.7482	69.117	12.8066	119.319	52.3343	18.503
8.8384	118.322	8.8384	112.448	8.8384	49.864	8.8384	81.432	8.8384	145.09	8.8384	95.945	8.8384	232.863	8.8384	72.003	12.8968	113.496	52.8889	18.6991
8.9286	130.2	8.9286	105.316	8.9286	50.78	8.9286	87.503	8.9286	152.902	8.9286	112.74	8.9286	239.587	8.9286	68.472	12.987	118.438	55.0443	19.4611
9.0188	129.07	9.0188	104.525	9.0188	57.941	9.0188	98.521	9.0188	146.798	9.0188	96.895	9.0188	234.512	9.0188	72.127	13.0772	117.549	51.5305	18.2188
9.1089	115.506	9.1089	82.47	9.1089	71.574	9.1089	120.014	9.1089	142.262	9.1089	90.949	9.1089	236.905	9.1089	83.51	13.1674	117.899	50.0953	17.7114
9.1991	102.874	9.1991	77.639	9.1991	61.213	9.1991	114.93	9.1991	152.716	9.1991	107.575	9.1991	237.24	9.1991	99.261	13.2576	119.181	51.1909	18.0987
9.2893	108.519	9.2893	81.058	9.2893	53.068	9.2893	102.483	9.2893	163.907	9.2893	125.645	9.2893	212.694	9.2893	110.164	13.3478	119.692	46.21	16.3377
9.3795	126.286	9.3795	90.199	9.3795	58.379	9.3795	96.02	9.3795	164.776	9.3795	111.281	9.3795	225.565	9.3795	113.227	13.438	123.217	48.0726	16.9962
9.4697	121.006	9.4697	54.235	9.4697	43.049	9.4697	90.843	9.4697	162.73					9.4697	110.31	13.5281	97.0288	40.5202	16.5423
9.5599	125.465	9.5599	41.516	9.5599	47.926			9.5599	185.238					9.5599	127.221	13.6183	105.473	54.1059	24.1969
9.6501	143.335	9.6501	72.403	9.6501	39.194											13.7085	84.9773	43.4352	25.0773
9.7403	171.7	9.7403	86.236	9.7403	50.264											13.7987	102.733	50.93	29.4044
9.8304	165.603	9.8304	80.852	9.8304	42.574											13.8889	96.343	51.407	29.6798
9.9206	165.195	9.9206	73.92	9.9206	36.354											13.9791	91.823	54.1011	31.2353
10.0108	150.046	10.0108	68.628	10.0108	59.96											14.0693	92.878	40.5785	23.428
10.101	128.975			10.101	60.381											14.1595	94.678	34.297	24.2516
10.1912	127.721															14.2496	127.721	0	0
10.2814	124.504															14.3398	124.504	0	0
10.3716	146.565															14.43	146.565	0	0
10.4618	131.776															14.5202	131.776	0	0

## Sheet: 4I_BdTAN1-mVenus
Quantification of grey value (Y) for cell outline tracing (X) of BdTAN1-mCitrine reporter line, corresponding to Figure 4E, plotted were 4µm SMC outline before (white) and green (orange) the GMC (grey). The first 4 µm were taken by reversing the measurement, taking the first 4µm and reverseing these, hence the reversed X values in the raw data.
003-1		003-2		008-1		008-2		008-3		012-2		18		019-1		019-2		024-2		025-		WT-3 01		WT-3 02							TAN1 preGC					TAN1 preGC	norm
X	Y	X	Y	X	Y	X	Y	X	Y	X	Y	X	Y	X	Y	X	Y	X	Y	X	Y	X	Y	X	Y	X position	average	stdev	stderror				stdev	stderror
3.9683	11.984	3.9683	16.547	3.9683	12.7361	3.9683	14.1598	3.9683	34.3739	3.9683	28.166	3.9683	35.2679	3.9683	18.533	3.9683	15.922	3.9683	4.5597	3.9683	12.311	3.9683	16.9297	3.9683	14.501	0	18.1532	8.68723	2.4094		0	18.1532	8.68723	2.4094		0	0.19	0.09	0.02
3.7879	11.175	3.7879	13.364	3.7879	16.4752	3.7879	18.8076	3.7879	24.0137	3.7879	17.296	3.7879	9.5614	3.7879	10.123	3.7879	14.18	3.7879	6.4126	3.7879	16.174	3.7879	15.2819	3.7879	12.419	0.1804	14.2526	4.3777	1.21416		0.1804	14.2526	4.3777	1.21416		0.1804	0.15	0.04	0.02
3.6075	16.569	3.6075	29.933	3.6075	11.8366	3.6075	30.4611	3.6075	18.049	3.6075	27.15	3.6075	6.3709	3.6075	17.213	3.6075	9	3.6075	6.9964	3.6075	18.301	3.6075	16.6796	3.6075	8.889	0.3608	16.7268	7.9573	2.20696		0.3608	16.7268	7.9573	2.20696		0.3608	0.17	0.08	0.02
3.4271	22.36	3.4271	26.008	3.4271	24.7948	3.4271	27.7733	3.4271	23.2199	3.4271	25.363	3.4271	15.745	3.4271	20.746	3.4271	11.52	3.4271	10.8937	3.4271	16.908	3.4271	16.1888	3.4271	15.823	0.5411	19.7957	5.39727	1.49693		0.5411	19.7957	5.39727	1.49693		0.5411	0.2	0.06	0.02
3.2468	29.274	3.2468	31.273	3.2468	23.8084	3.2468	25.901	3.2468	25.2269	3.2468	33.705	3.2468	12.8498	3.2468	17.334	3.2468	19.3	3.2468	12.5758	3.2468	17.129	3.2468	15.0927	3.2468	25.057	0.7215	22.1944	6.71796	1.86323		0.7215	22.1944	6.71796	1.86323		0.7215	0.23	0.07	0.02
3.0664	28.749	3.0664	47.267	3.0664	15.031	3.0664	18.1794	3.0664	26.3461	3.0664	74.14	3.0664	16.3764	3.0664	25.649	3.0664	18.714	3.0664	15.4308	3.0664	23	3.0664	15.7633	3.0664	20.712	0.9019	26.566	16.0624	4.45492		0.9019	26.566	16.0624	4.45492		0.9019	0.27	0.16	0.03
2.886	30.2	2.886	54.313	2.886	19.7145	2.886	15.9804	2.886	28.449	2.886	95.896	2.886	17.7076	2.886	18.397	2.886	22.321	2.886	15.9969	2.886	27.076	2.886	16.0802	2.886	18.631	1.0823	29.2894	21.6688	6.00984		1.0823	29.2894	21.6688	6.00984		1.0823	0.3	0.22	0.04
2.7056	39.797	2.7056	56.974	2.7056	22.0773	2.7056	32.9659	2.7056	32.1185	2.7056	130.964	2.7056	32.5139	2.7056	22.47	2.7056	33.091	2.7056	9.4821	2.7056	30.415	2.7056	25.9812	2.7056	28.913	1.2626	38.2895	28.7042	7.96112		1.2626	38.2895	28.7042	7.96112		1.2626	0.39	0.29	0.04
2.5253	45.777	2.5253	59.546	2.5253	31.388	2.5253	36.3037	2.5253	32.0532	2.5253	191.222	2.5253	51.0325	2.5253	28.846	2.5253	39.51	2.5253	20.4482	2.5253	50.066	2.5253	31.4804	2.5253	49.703	1.443	51.3366	41.7506	11.5795		1.443	51.3366	41.7506	11.5795		1.443	0.53	0.43	0.05
2.3449	59.704	2.3449	77.775	2.3449	47.5298	2.3449	36.8035	2.3449	38.9672	2.3449	222.319	2.3449	48.4298	2.3449	73.429	2.3449	50.009	2.3449	26.3388	2.3449	43.637	2.3449	33.5421	2.3449	64.081	1.6234	63.2742	48.1916	13.3659		1.6234	63.2742	48.1916	13.3659		1.6234	0.65	0.49	0.05
2.1645	72.496	2.1645	120.504	2.1645	56.9929	2.1645	47.7144	2.1645	35.61	2.1645	224.238	2.1645	63.8419	2.1645	70.012	2.1645	60.909	2.1645	22.6569	2.1645	54.889	2.1645	35.2971	2.1645	88.522	1.8038	73.3602	49.7576	13.8003		1.8038	73.3602	49.7576	13.8003		1.8038	0.75	0.51	0.05
1.9841	87.748	1.9841	131.635	1.9841	55.4216	1.9841	53.9703	1.9841	36.8002	1.9841	180.481	1.9841	74.4722	1.9841	79.694	1.9841	55.064	1.9841	31.4514	1.9841	74.433	1.9841	48.6207	1.9841	120.046	1.9841	79.2183	40.7538	11.3031		1.9841	79.2183	40.7538	11.3031		1.9841	0.81	0.42	0.05
1.8038	87.063	1.8038	159.144	1.8038	52.8198	1.8038	43.0332	1.8038	43.7841	1.8038	181.235	1.8038	78.0744	1.8038	111.177	1.8038	72.915	1.8038	24.3726	1.8038	86.751	1.8038	53.0618	1.8038	124.046	2.1645	85.9598	45.0205	12.4864		2.1645	85.9598	45.0205	12.4864		2.1645	0.88	0.46	0.05
1.6234	91.453	1.6234	193.23	1.6234	69.8303	1.6234	39.1499	1.6234	55.1158	1.6234	209.352	1.6234	77.3659	1.6234	90.491	1.6234	105.411	1.6234	47.3869	1.6234	126.844	1.6234	46.8985	1.6234	114.973	2.3449	97.5001	51.466	14.2741		2.3449	97.5001	51.466	14.2741		2.3449	1	0.53	0.06
1.443	111.138	1.443	163.204	1.443	86.72	1.443	35.6258	1.443	55.2092	1.443	200.352	1.443	57.0671	1.443	93.629	1.443	97.938	1.443	42.5855	1.443	126.64	1.443	52.6024	1.443	93.195	2.5253	93.5312	46.5411	12.9082		2.5253	93.5312	46.5411	12.9082		2.5253	0.96	0.48	0.05
1.2626	114.283	1.2626	124.46	1.2626	66.8703	1.2626	38.6566	1.2626	50.1973	1.2626	138.126	1.2626	61.006	1.2626	102.694	1.2626	93.74	1.2626	38.8546	1.2626	60.609	1.2626	49.2283	1.2626	63.428	2.7056	77.0887	32.2793	8.95267		2.7056	77.0887	32.2793	8.95267		2.7056	0.79	0.33	0.04
1.0823	76.741	1.0823	103.722	1.0823	48.9616	1.0823	21.8134	1.0823	31.3809	1.0823	74.578	1.0823	57.5348	1.0823	69.023	1.0823	63.394	1.0823	39.3095	1.0823	32.734	1.0823	41.3538	1.0823	37.742	2.886	53.7145	22.1942	6.15555		2.886	53.7145	22.1942	6.15555		2.886	0.55	0.23	0.04
0.9019	54.905	0.9019	94.55	0.9019	47.3862	0.9019	28.262	0.9019	35.3031	0.9019	57.784	0.9019	39.8133	0.9019	64.492	0.9019	54.987	0.9019	35.696	0.9019	38.059	0.9019	42.9704	0.9019	40.018	3.0664	48.7866	16.5958	4.60286		3.0664	48.7866	16.5958	4.60286		3.0664	0.5	0.17	0.03
0.7215	48.467	0.7215	67.848	0.7215	34.3078	0.7215	45.8043	0.7215	36.4609	0.7215	45.027	0.7215	33.315	0.7215	55.613	0.7215	45.508	0.7215	23.8382	0.7215	34.55	0.7215	44.3446	0.7215	35.779	3.2468	42.3741	10.8281	3.00316		3.2468	42.3741	10.8281	3.00316		3.2468	0.43	0.11	0.03
0.5411	44.732	0.5411	30.942	0.5411	33.3967	0.5411	41.0089	0.5411	40.7795	0.5411	26.454	0.5411	34.1712	0.5411	39.46	0.5411	49.544	0.5411	10.5713	0.5411	39.1	0.5411	38.2787	0.5411	27.932	3.4271	35.1054	9.45651	2.62276		3.4271	35.1054	9.45651	2.62276		3.4271	0.36	0.1	0.02
0.3608	42.249	0.3608	2.812	0.3608	38.1987	0.3608	17.0185	0.3608	24.6107	0.3608	29.588	0.3608	29.1077	0.3608	25.076	0.3608	33.093	0.3608	15.3666	0.3608	39.215	0.3608	30.2074	0.3608	29.052	3.6075	27.3534	10.3691	2.87586		3.6075	27.3534	10.3691	2.87586		3.6075	0.28	0.11	0.03
0.1804	36.636	0.1804	16.982	0.1804	30.5517	0.1804	34.8526	0.1804	25.0383	0.1804	35.366	0.1804	33.0612	0.1804	27.471	0.1804	25.537	0.1804	18.5312	0.1804	26.308	0.1804	21.338	0.1804	22.793	3.7879	27.2666	6.2108	1.72256		3.7879	27.2666	6.2108	1.72256		3.7879	0.28	0.06	0.02
0	39	0	0	0	23	0	0	0	9	0	39	0	36	0	19	0	16	0	29	0	33	0	24	0	24	3.9683	22.3846	12.8095	3.55271		3.9683	22.3846	12.8095	3.55271		3.9683	0.23	0.13	0.03
0	29.272	0	16.662	0	13.6	0	7.5339	0	35.8505	0	38.946	0	40.9955	0	31.802	0	25.151	0	9.1887	0	39.007	0	31.26	0	30.44	4.1486	26.9007	11.1119	3.0819
0.1804	32.861	0.1804	38.264	0.1804	17.4	0.1804	24.3148	0.1804	17.4179	0.1804	40.832	0.1804	33.4279	0.1804	27.529	0.1804	32.388	0.1804	10.0207	0.1804	56.593	0.1804	27.74	0.1804	24.56	4.329	29.4883	11.4503	3.17574
0.3608	31.514	0.3608	34.13	0.3608	23	0.3608	25.7239	0.3608	8.1345	0.3608	22.006	0.3608	30.0928	0.3608	20.581	0.3608	28.704	0.3608	14.4228	0.3608	48.991	0.3608	20.7	0.3608	27.68	4.5094	25.8215	9.55651	2.6505
0.5411	45.285	0.5411	43.683	0.5411	21.6	0.5411	29.7273	0.5411	14.7208	0.5411	40.103	0.5411	39.1934	0.5411	21.897	0.5411	17.892	0.5411	24.5305	0.5411	35.902	0.5411	34.18	0.5411	34.44	4.6898	31.0118	9.65728	2.67845
0.7215	51.25	0.7215	42.922	0.7215	17.4	0.7215	32.1345	0.7215	22.8365	0.7215	28.078	0.7215	32.3391	0.7215	24.504	0.7215	16.282	0.7215	20.9759	0.7215	37.046	0.7215	32.76	0.7215	35	4.8701	30.2714	9.70118	2.69062		TAN1 post GC					TAN1 postGC	norm
0.9019	46.936	0.9019	38.91	0.9019	21.6	0.9019	26.6101	0.9019	34.1778	0.9019	60.083	0.9019	18.5473	0.9019	30.054	0.9019	19.104	0.9019	28.7887	0.9019	46.106	0.9019	16.78	0.9019	38.68	5.0505	32.7982	12.4955	3.46563				stdev	stderror
1.0823	37.406	1.0823	45.487	1.0823	15.4	1.0823	23.5184	1.0823	10.2489	1.0823	23.043	1.0823	20.689	1.0823	30.122	1.0823	9.133	1.0823	22.3586	1.0823	44.396	1.0823	22.22	1.0823	35.32	5.2309	26.1032	11.3259	3.14123		0	56.072	26.3854	7.31799		0	0.68	0.32	0.04
1.2626	26.274	1.2626	38.835	1.2626	15	1.2626	22.25	1.2626	21.0267	1.2626	38.646	1.2626	30.4127	1.2626	26.798	1.2626	9.437	1.2626	17.3522	1.2626	31.213	1.2626	32.6849	1.2626	45.12	5.4113	27.3115	9.8794	2.74005		0.1804	63.8352	31.0388	8.60861		0.1804	0.77	0.38	0.05
1.443	32.986	1.443	50.867	1.443	21	1.443	26.6321	1.443	27.0321	1.443	34.035	1.443	27.9017	1.443	34.932	1.443	15.001	1.443	20.9637	1.443	23.82	1.443	23.8691	1.443	25.76	5.5916	28.0615	8.51262	2.36097		0.3608	71.6557	35.4315	9.82694		0.3608	0.87	0.43	0.05
1.6234	41.289	1.6234	41.694	1.6234	14.2	1.6234	28.8636	1.6234	28.7779	1.6234	23.834	1.6234	27.3267	1.6234	17.42	1.6234	23.734	1.6234	30.4533	1.6234	33.583	1.6234	22.7701	1.6234	30.44	5.772	28.0297	7.71782	2.14054		0.5411	79.6179	51.4683	14.2747		0.5411	0.97	0.62	0.06
1.8038	42.686	1.8038	37.099	1.8038	17	1.8038	29.0087	1.8038	16.0111	1.8038	18.565	1.8038	21.152	1.8038	11.622	1.8038	24.25	1.8038	33.7369	1.8038	29.345	1.8038	26.0163	1.8038	41.12	5.9524	26.7394	9.49724	2.63406		0.7215	82.4618	56.0932	15.5575		0.7215	1	0.68	0.06
1.9841	43.072	1.9841	36.701	1.9841	11	1.9841	27.1433	1.9841	25.2173	1.9841	21.034	1.9841	23.9757	1.9841	25.724	1.9841	10.911	1.9841	29.7209	1.9841	29.872	1.9841	19.2124	1.9841	39.24	6.1328	26.371	9.35544	2.59473		0.9019	81.4167	60.2107	16.6994		0.9019	0.99	0.73	0.07
2.1645	35.172	2.1645	39.809	2.1645	19	2.1645	24.0416	2.1645	19.042	2.1645	17.101	2.1645	33.0362	2.1645	36.42	2.1645	25.481	2.1645	22.9547	2.1645	30.904	2.1645	20.2401	2.1645	25.2	6.3131	26.8001	7.19202	1.99471		1.0823	64.8577	52.4227	14.5394		1.0823	0.79	0.64	0.06
2.3449	40.948	2.3449	36.694	2.3449	17.8	2.3449	24.3329	2.3449	18.66	2.3449	22.996	2.3449	30.4824	2.3449	35.372	2.3449	9.136	2.3449	25.3512	2.3449	36.238	2.3449	28.0879	2.3449	42.4	6.4935	28.346	9.48704	2.63123		1.2626	51.5125	38.1699	10.5864		1.2626	0.62	0.46	0.05
2.5253	38.801	2.5253	40.326	2.5253	14.2	2.5253	21.2239	2.5253	19.3138	2.5253	30.417	2.5253	27.6193	2.5253	30.31	2.5253	11.741	2.5253	30.2971	2.5253	36.562	2.5253	27.1585	2.5253	29.28	6.6739	27.4807	8.47395	2.35025		1.443	42.2925	25.2421	7.0009		1.443	0.51	0.31	0.04
2.7056	35.354	2.7056	32.358	2.7056	21.8	2.7056	25.3172	2.7056	15.6778	2.7056	34.933	2.7056	39.1802	2.7056	30.209	2.7056	22.373	2.7056	28.3007	2.7056	48.762	2.7056	20.0241	2.7056	34.44	6.8543	29.9022	8.63514	2.39496		1.6234	36.6107	18.7433	5.19846		1.6234	0.44	0.23	0.04
2.886	23.798	2.886	38.716	2.886	30.2	2.886	23.9365	2.886	19.8623	2.886	31.481	2.886	43.2749	2.886	26.893	2.886	14.371	2.886	43.9193	2.886	44.974	2.886	19.6583	2.886	45.12	7.0346	31.2465	10.4502	2.89836		1.8038	30.6391	17.4245	4.8327		1.8038	0.37	0.21	0.04
3.0664	38.101	3.0664	27.857	3.0664	20.4	3.0664	28.4362	3.0664	30.3945	3.0664	29.349	3.0664	33.71	3.0664	31.25	3.0664	10.628	3.0664	32.4209	3.0664	53.266	3.0664	27.1394	3.0664	34.04	7.215	30.5378	9.29812	2.57884		1.9841	27.5064	16.4173	4.55333		1.9841	0.33	0.2	0.03
3.2468	37.889	3.2468	23.181	3.2468	22.6	3.2468	28.6522	3.2468	30.2412	3.2468	27.047	3.2468	16.69	3.2468	40.177	3.2468	13.506	3.2468	31.8023	3.2468	44.276	3.2468	24.0846	3.2468	33	7.3954	28.7036	8.57574	2.37848		2.1645	24.2961	15.1141	4.1919		2.1645	0.29	0.18	0.03
3.4271	29.201	3.4271	29.202	3.4271	11.8	3.4271	31.9236	3.4271	27.5755	3.4271	26.643	3.4271	23.6	3.4271	40.161	3.4271	19.333	3.4271	25.9727	3.4271	32.689	3.4271	24.3072	3.4271	41.28	7.5758	27.976	7.55083	2.09422		2.3449	22.9779	9.48491	2.63064		2.3449	0.28	0.12	0.03
3.6075	26.166	3.6075	32.385	3.6075	23.6	3.6075	35.572	3.6075	31.6295	3.6075	30.246	3.6075	33.71	3.6075	38.216	3.6075	11.303	3.6075	17.1276	3.6075	24.308	3.6075	22.6313	3.6075	29.12	7.7561	27.3857	7.28685	2.02101		2.5253	20.3194	9.28333	2.57473		2.5253	0.25	0.11	0.03
3.7879	21.293	3.7879	36.018	3.7879	30.6	3.7879	45.6363	3.7879	25.7	3.7879	18.423	3.7879	17.61	3.7879	15.061	3.7879	24.508	3.7879	20.0973	3.7879	23.334	3.7879	23.3838	3.7879	30.76	7.9365	25.5711	8.07704	2.24017		2.7056	19.686	12.1882	3.38039		2.7056	0.24	0.15	0.03
3.9683	27.69	3.9683	34.413	3.9683	43	3.9683	34.4503	3.9683	33.8153	3.9683	27.452	3.9683	25.99	3.9683	25.299	3.9683	16.013	3.9683	40.516	3.9683	9.826	3.9683	31.5138	3.9683	36.52	8.1169	29.7306	8.9008	2.46864		2.886	17.793	13.5968	3.77109		2.886	0.22	0.16	0.03
4.1486	30.263	4.1486	39.609	4.1486	21.8	4.1486	29.1955	4.1486	17.8941	4.1486	23.596	4.1486	32.09	4.1486	28.972	4.1486	13.651	4.1486	32.685	4.1486	12.112	4.1486	35.2361	4.1486	37.778	8.2973	27.2986	8.50702	2.35942		3.0664	15.4077	9.25837	2.56781		3.0664	0.19	0.11	0.03
4.329	36.956	4.329	39.63	4.329	33.6	4.329	26.8921	4.329	28.1456	4.329	30.931	4.329	20.61	4.329	31.972	4.329	20.089	4.329	27.6943	4.329	21.311	4.329	22.4489	4.329	33.269	8.4776	28.7345	6.11454	1.69587		3.2468	16.2547	10.6997	2.96756		3.2468	0.2	0.13	0.03
4.5094	64.782	4.5094	44.153	4.5094	33.4	4.5094	34.4047	4.5094	26.5392	4.5094	37.174	4.5094	26	4.5094	40.641	4.5094	17.994	4.5094	26.4287	4.5094	29.168	4.5094	21.9277	4.5094	28.155	8.658	33.1359	11.5427	3.20137		3.4271	15.2413	9.28421	2.57498		3.4271	0.18	0.11	0.03
4.6898	70.855	4.6898	37.967	4.6898	24.2	4.6898	17.5641	4.6898	32.2987	4.6898	31.232	4.6898	25.31	4.6898	60.814	4.6898	22.686	4.6898	37.5567	4.6898	30.39	4.6898	28.0519	4.6898	31.802	8.8384	34.6713	14.5002	4.02162		3.6075	16.0502	9.10095	2.52415		3.6075	0.19	0.11	0.03
4.8701	57.001	4.8701	57.993	4.8701	30.7042	4.8701	17.074	4.8701	25.2132	4.8701	37.877	4.8701	23.69	4.8701	69.082	4.8701	41.672	4.8701	35.6801	4.8701	22.905	4.8701	33.9875	4.8701	24.784	9.0188	36.7433	15.1993	4.21551		3.7879	15.6996	10.3205	2.8624		3.7879	0.19	0.13	0.03
5.0505	80.509	5.0505	87.649	5.0505	40.238	5.0505	27.0259	5.0505	32.9009	5.0505	42.348	5.0505	26.2065	5.0505	68.676	5.0505	43.264	5.0505	39.4466	5.0505	26.928	5.0505	33.7092	5.0505	26.353	9.1991	42.348	0	0		3.9683	14.9155	8.9094	2.47102		3.9683	0.18	0.11	0.03
5.2309	83.892	5.2309	112.723	5.2309	31.5356	5.2309	28.4104	5.2309	24.0677	5.2309	84.037	5.2309	28.1344	5.2309	83.948	5.2309	66.69	5.2309	46.9891	5.2309	17.309	5.2309	32.5195	5.2309	25.011	9.3795	70.7577	30.593	12.4895
5.4113	64.152	5.4113	141.661	5.4113	32.2665	5.4113	25.7697	5.4113	37.2246	5.4113	125.101	5.4113	19.2085	5.4113	65.324	5.4113	87.967	5.4113	39.4893	5.4113	26.863	5.4113	32.6197	5.4113	28.592	9.5599	77.79	47.5023	21.2437
5.5916	59.172	5.5916	157.115	5.5916	42.2601	5.5916	24.6473	5.5916	40.5266	5.5916	189.686	5.5916	35.0964	5.5916	84.532	5.5916	84.747	5.5916	45.8893	5.5916	21.611	5.5916	39.6243	5.5916	32.157	9.7403	71.561	53.7112	16.985
5.772	61.877	5.772	189.983	5.772	38.8296	5.772	29.0661	5.772	54.2475	5.772	229.14	5.772	7.3818	5.772	83.99	5.772	90.622	5.772	41.1205	5.772	24.974	5.772	45.3104	5.772	34.527	9.9206	80.8091	66.6424	21.0742
5.9524	58.729	5.9524	152.765	5.9524	58.3543	5.9524	25.0621	5.9524	70.4655	5.9524	251.852	5.9524	30.4055	5.9524	88.149	5.9524	103.836	5.9524	45.038	5.9524	28.443	5.9524	55.6115	5.9524	57.595	10.101	86.3621	63.9052	20.2086
6.1328	45.824	6.1328	155.106	6.1328	81.6534	6.1328	28.1677	6.1328	77.3665	6.1328	201.939	6.1328	28.0229	6.1328	78.256	6.1328	72.056	6.1328	26.1617	6.1328	43.806	6.1328	76.1007	6.1328	89.938	10.2814	86.0513	51.9843	16.4389
6.3131	33.721	6.3131	162.886	6.3131	45.0025	6.3131	28.779	6.3131	67.1828	6.3131	129.549	6.3131	73.8707	6.3131	48.026	6.3131	52.568	6.3131	26.4198	6.3131	59.32	6.3131	58.2018	6.3131	138.079	10.4618	73.7847	47.7858	15.1112
6.4935	33.197	6.4935	139.698	6.4935	68.2541	6.4935	26.4602	6.4935	46.6847	6.4935	92.719	6.4935	54.9831	6.4935	40.725	6.4935	53.019	6.4935	38.881	6.4935	92.723	6.4935	56.7246	6.4935	115.042	10.6421	67.0106	34.0327	9.82439
6.6739	23.386	6.6739	93.738	6.6739	56.1018	6.6739	24.1594	6.6739	37.1229	6.6739	71.915	6.6739	42.1392	6.6739	50.711	6.6739	73.142	6.6739	27.8464	6.6739	105.238	6.6739	40.4192	6.6739	72.848	10.8225	55.2898	25.3625	7.03428
6.8543	20.336	6.8543	71.489	6.8543	47.9456	6.8543	25.7333	6.8543	33.4901	6.8543	79.861	6.8543	63.0616	6.8543	47.196	6.8543	50.198	6.8543	16.3494	6.8543	102.296	6.8543	32.0225	6.8543	52.46	11.0029	49.4183	23.9706	6.64825
7.0346	16.966	7.0346	42.469	7.0346	36.5273	7.0346	20.6202	7.0346	38.9379	7.0346	65.657	7.0346	57.4924	7.0346	38.327	7.0346	39.072	7.0346	8.9845	7.0346	84.055	7.0346	35.5697	7.0346	44.555	11.1833	40.7102	19.2753	5.346
7.215	14.437	7.215	33.37	7.215	49.5825	7.215	13.0433	7.215	48.5351	7.215	54.039	7.215	48.9071	7.215	44.526	7.215	32.783	7.215	13.4701	7.215	74.281	7.215	26.2602	7.215	30.732	11.3636	37.2282	17.5227	4.85992
7.3954	12.479	7.3954	36	7.3954	36.7292	7.3954	8.9066	7.3954	41.6781	7.3954	40.808	7.3954	62.856	7.3954	51.06	7.3954	23.205	7.3954	11.944	7.3954	74.03	7.3954	27.6559	7.3954	26.68	11.544	34.9255	18.8545	5.22929
7.5758	18.245	7.5758	28.492	7.5758	36.3334	7.5758	12.767	7.5758	28.126	7.5758	44.581	7.5758	62.9903	7.5758	36.873	7.5758	26.663	7.5758	7.7875	7.5758	54.075	7.5758	12.4174	7.5758	22.593	11.7244	30.1495	15.8772	4.40355
7.7561	15.413	7.7561	26.081	7.7561	27.4421	7.7561	12.5463	7.7561	30.2182	7.7561	48.084	7.7561	63.8223	7.7561	28.947	7.7561	21.914	7.7561	10.981	7.7561	21.671	7.7561	11.3149	7.7561	15.807	11.9048	25.7109	14.7266	4.08443
7.9365	18.935	7.9365	26.669	7.9365	15.8706	7.9365	5.6989	7.9365	25.8302	7.9365	49.491	7.9365	53.8722	7.9365	40.065	7.9365	18.415	7.9365	15.4196	7.9365	22.28	7.9365	20.7079	7.9365	18.559	12.0851	25.5241	13.4604	3.73326
8.1169	28.932	8.1169	23.59	8.1169	10.7628	8.1169	6.7343	8.1169	20.2942	8.1169	28.457	8.1169	40.2448	8.1169	40.832	8.1169	13.226	8.1169	12.9728	8.1169	32.247	8.1169	8.4064	8.1169	15.761	12.2655	21.7277	11.1915	3.10396
8.2973	31.904	8.2973	14.131	8.2973	20.5801	8.2973	8.4502	8.2973	26.6817	8.2973	36.185	8.2973	26.8535	8.2973	32.037	8.2973	12.446	8.2973	18.2144	8.2973	19.158	8.2973	7.3996	8.2973	9.628	12.4459	20.2822	9.34228	2.59108
8.4776	23.65	8.4776	9.167	8.4776	24.2789	8.4776	9.6196	8.4776	15.9985	8.4776	23.775	8.4776	23.976	8.4776	37.194	8.4776	15.101	8.4776	12.7434	8.4776	30.656	8.4776	2.1552	8.4776	11.503	12.6263	18.4475	9.39703	2.60627
8.658	23.314	8.658	26.112	8.658	27.2255	8.658	14.0715	8.658	11.9397	8.658	35.596	8.658	20.286	8.658	28.729	8.658	13.517	8.658	9.9156	8.658	21.665	8.658	6.0507	8.658	10.589	12.8066	19.1547	8.5058	2.35908
8.8384	17.789	8.8384	24.719	8.8384	19.2648	8.8384	19.7118	8.8384	20.3004	8.8384	33.003	8.8384	13.1324	8.8384	26.196	8.8384	19.733	8.8384	11.9178	8.8384	11.496	8.8384	6.3069	8.8384	11.418	12.987	18.076	6.97933	1.93572
9.0188	16.82	9.0188	20.232	9.0188	18.6572	9.0188	17.7904	9.0188	11.0507	9.0188	29.031	9.0188	13.4492	9.0188	25.436	9.0188	21.282	9.0188	3	9.0188	12.122	9.0188	3.9969	9.0188	14.985	13.1674	15.9886	7.2097	1.99961
9.1991	16.215	9.1991	17.042	9.1991	18.7382	9.1991	13.6065	9.1991	15.647	9.1991	23.955	9.1991	18.3034	9.1991	20.874	9.1991	14.088	9.1991	3.5196	9.1991	10.562	9.1991	4.1756	9.1991	13.53	13.3478	14.6351	5.66714	1.57178
9.3795	19.147	9.3795	23.762	9.3795	17.601	9.3795	27.1581	9.3795	34.864	9.3795	19.064	9.3795	14.0215	9.3795	20.404	9.3795	10.527	9.3795	10.2409	9.3795	5.95	9.3795	1.3309	9.3795	7.203	13.5281	16.2518	8.9513	2.48264
9.5599	15.741	9.5599	24.933	9.5599	15.018	9.5599	31.7774	9.5599	32.672	9.5599	23.948	9.5599	12.0896	9.5599	26.469	9.5599	11.96	9.5599	5.3632	9.5599	10.07	9.5599	0.0624	9.5599	12.796	13.7085	17.1461	9.63806	2.67312
9.7403	15.117	9.7403	26.71	9.7403	9.907	9.7403	38.6525	9.7403	34.2015	9.7403	23	9.7403	4.2162	9.7403	29.696	9.7403	7.295	9.7403	8.996	9.7403	3.131	9.7403	2	9.7403	4.134	13.8889	15.9274	12.4024	3.43981
9.9206	18.593	9.9206	32.44	9.9206	11.5969	9.9206	30.9623	9.9206	35.6257	9.9206	10.08	9.9206	10.8478	9.9206	20.027	9.9206	4.581	9.9206	18.7498	9.9206	4.012	9.9206	1.9788	9.9206	2.942	14.0693	15.572	11.1962	3.10528
10.101	21.445	10.101	21.04	10.101	13.406	10.101	24.2587	10.101	23.6113	10.101	13.6	10.101	13.284	10.101	18.716	10.101	8.027	10.101	6.4701	10.101	5.071	10.101	2.0363	10.101	5.609	14.2496	13.5826	7.38633	2.0486
10.2814	20.881	10.2814	27.8	10.2814	21.6305	10.2814	23.9224	10.2814	31.9945	10.2814	10.68	10.2814	15.4053	10.2814	22.698	10.2814	8.36	10.2814	12.7082	10.2814	4.656	10.2814	4.8162	10.2814	14.168	14.43	16.9015	8.33267	2.31107
10.4618	28.087	10.4618	11.4	10.4618	25.6646	10.4618	14.9931	10.4618	26.3547	10.4618	12.04	10.4618	5.5019	10.4618	24.196	10.4618	14.556	10.4618	10.8781	10.4618	6.107	10.4618	3.0593	10.4618	10.431	14.6104	14.8668	8.18034	2.26882
10.6421	25.971	10.6421	26.6	10.6421	24.7154	10.6421	9.8894	10.6421	30.686	10.6421	15.28	10.6421	6.8376	10.6421	18.002	10.6421	13.286	10.6421	9.7001	10.6421	3.503	10.6421	6.8613	10.6421	6.514
