# Supplementary material for: Opposite polarity programs regulate asymmetric subsidiary cell divisions in grasses
Source: eLife. 2022 Dec 20;11:e79913. doi: 10.7554/eLife.79913 (PMC9767456; doi:10.7554/eLife.79913)
Supplement: Figure 5—figure supplement 1—source data 1. [file elife-79913-fig5-figsupp1-data1.xlsx]

## Sheet: stomatal anatomical parameters
Quantifications of stomatal density in WT, bdpolar-1, bdpan1-1 and bdpolar-1;bdpan1-1.							Quantifications of GC length in WT, bdpolar-1, bdpan1-1 and bdpolar-1;bdpan1-1.
genotypes	stomata						genotypes	GC lengths
WT #6	12						WT	19.539
WT #6	22						WT	22.361
WT #6	14						WT	24.196
WT #6	24						WT	23.19
WT #8	17						WT	24.363
WT #8	16						WT	21.732
WT #8	16						WT	22.375
WT #8	22						WT	19.509
WT #9	16						WT	22.869
WT #9	17						WT	22.592
WT #9	21						WT	18.811
WT #9	17						WT	19.192
WT #1	16						WT	20.578
WT #1	17						WT	19.391
WT #1	21						WT	21.63
WT #1	19						WT	23.233
WT #3	17						WT	24.603
WT #3	21						WT	21.376
WT #3	21						WT	22.115
WT #3	18						WT	27.906
bdpolar-1 #8	18						WT	25.943
bdpolar-1 #8	18						WT	26.571
bdpolar-1 #8	21						WT	23.045
bdpolar-1 #8	21						WT	25.472
bdpolar-1 #9	31						WT	20.973
bdpolar-1 #9	20						WT	25.101
bdpolar-1 #9	26						WT	27.771
bdpolar-1 #9	23						WT	26.374
bdpolar-1 #10	18						WT	24.292
bdpolar-1 #10	20						WT	27.223
bdpolar-1 #10	23						WT	27.223
bdpolar-1 #10	14						WT	26.263
bdpolar-1 #2	20						WT	29.834
bdpolar-1 #2	22						WT	27.39
bdpolar-1 #2	18						WT	22.151
bdpolar-1 #2	20						WT	25.419
bdpolar-1 #1	25						WT	27.203
bdpolar-1 #1	15						WT	21.545
bdpolar-1 #1	24						WT	24.346
bdpolar-1 #1	21						WT	25.481
bdpan1-1 #8	24						WT	28.287
bdpan1-1 #8	26						WT	25.204
bdpan1-1 #8	24						WT	27.816
bdpan1-1 #8	21						WT	21.152
bdpan1-1 #9	20						WT	27.342
bdpan1-1 #9	16						WT	23.514
bdpan1-1 #9	26						WT	26.263
bdpan1-1 #9	19						WT	26.052
bdpan1-1 #10	24						WT	24.517
bdpan1-1 #10	19						WT	23.333
bdpan1-1 #10	18						WT	24.517
bdpan1-1 #10	19						WT	24.292
bdpan1-1 #2	20						WT	26.056
bdpan1-1 #2	18						WT	20.527
bdpan1-1 #2	19						WT	22.869
bdpan1-1 #2	18						WT	25.252
bdpan1-1 #1	19						WT	23.734
bdpan1-1 #1	24						WT	24.612
bdpan1-1 #1	23						WT	23.977
bdpan1-1 #1	19						WT	15.42
bdpolar-1;bdpan1-1 #7	19						WT	23.89
bdpolar-1;bdpan1-1 #7	22						WT	21.309
bdpolar-1;bdpan1-1 #7	19						WT	20.085
bdpolar-1;bdpan1-1 #7	22						WT	18.056
bdpolar-1;bdpan1-1 #9	20						WT	16.591
bdpolar-1;bdpan1-1 #9	18						WT	23.987
bdpolar-1;bdpan1-1 #9	23						WT	19.143
bdpolar-1;bdpan1-1 #9	18						WT	20.093
bdpolar-1;bdpan1-1 #10	20						WT	19.129
bdpolar-1;bdpan1-1 #10	23						WT	26.518
bdpolar-1;bdpan1-1 #10	16						WT	22.713
bdpolar-1;bdpan1-1 #10	16						WT	17.714
bdpolar-1;bdpan1-1 #1	18						WT	16.793
bdpolar-1;bdpan1-1 #1	21						WT	27.543
bdpolar-1;bdpan1-1 #1	21						WT	21.386
bdpolar-1;bdpan1-1 #1	23						WT	18.838
bdpolar-1;bdpan1-1 #1	22						WT	22.703
bdpolar-1;bdpan1-1 #1	20						WT	25.955
bdpolar-1;bdpan1-1 #1	21						WT	24.057
bdpolar-1;bdpan1-1 #1	18						WT	22.361
							WT	18.797
							WT	23.333
							WT	22.682
							WT	23.411
							WT	21.713
							WT	25.601
							WT	23.71
							WT	23.833
							WT	25.617
							WT	17.498
							WT	18.805
							WT	19.129
							WT	25.931
							WT	21.072
							WT	22.379
							WT	22.379
							WT	20.155
							WT	24.118
							WT	22.186
							WT	21.828
							WT	21.386
							WT	23.981
							WT	24.635
							WT	17.848
							WT	19.769
							WT	15.907
							WT	20.093
							WT	24.984
							WT	22.094
							WT	20.301
							WT	23.152
							WT	20.404
							WT	28.282
							WT	24.44
							WT	25.308
							WT	20.67
							WT	18.93
							WT	19.26
							WT	27.288
							WT	26.297
							WT	23.281
							WT	23.474
							WT	23.281
							WT	23.152
							WT	26.265
							WT	25.525
							WT	26.73
							WT	23.875
							WT	21.474
							WT	21.584
							WT	21.221
							WT	25.252
							WT	26.124
							WT	23.601
							WT	26.408
							WT	23.767
							WT	24.665
							WT	22.74
							WT	25.12
							WT	22.271
							WT	26.086
							WT	30.521
							WT	23.118
							WT	25.824
							WT	26.029
							WT	21.209
							WT	23.247
							WT	27.179
							WT	24.956
							WT	22.621
							WT	22.436
							WT	29.278
							WT	25.801
							WT	26.213
							WT	21.659
							WT	19.026
							WT	21.822
							WT	24.79
							WT	21.263
							WT	22.025
							WT	20.056
							WT	21.237
							WT	20.784
							WT	20.796
							WT	24.104
							WT	23.742
							WT	19.527
							WT	22.969
							WT	24.346
							WT	23.453
							WT	21.595
							WT	22.544
							WT	19.312
							WT	22.132
							WT	22.361
							WT	22.142
							WT	23.376
							WT	19.844
							WT	18.68
							WT	17.153
							WT	19.239
							WT	22.362
							WT	21.914
							WT	20.36
							WT	21.178
							WT	22.767
							WT	15.422
							WT	22.121
							WT	22.686
							WT	21.63
							WT	21.241
							WT	21.228
							WT	20.913
							WT	21.659
							WT	23.938
							WT	24.324
							WT	19.781
							WT	19.202
							WT	22.731
							WT	22.602
							WT	27.136
							WT	22.137
							WT	23.824
							WT	25.939
							WT	23.836
							WT	25.974
							WT	24.084
							WT	25.536
							WT	25.896
							WT	25.391
							WT	22.835
							WT	24.448
							WT	24.467
							WT	19.83
							WT	25.349
							WT	20.501
							WT	22.578
							WT	25.035
							WT	21.875
							WT	25.356
							WT	25.863
							WT	23.663
							WT	22.278
							WT	28.121
							WT	24.307
							WT	21.027
							WT	21.044
							WT	22.44
							WT	29.487
							WT	23.656
							WT	22.708
							WT	24.885
							WT	26.747
							WT	28.522
							WT	25.2
							WT	23.494
							WT	23.263
							WT	23.828
							WT	21.629
							WT	24.491
							WT	20.906
							WT	20.013
							WT	20.424
							WT	21.554
							bdpolar-1	19.539
							bdpolar-1	19.391
							bdpolar-1	20.184
							bdpolar-1	20.424
							bdpolar-1	23.19
							bdpolar-1	18.218
							bdpolar-1	18.894
							bdpolar-1	19.391
							bdpolar-1	20.03
							bdpolar-1	22.151
							bdpolar-1	22.433
							bdpolar-1	18.39
							bdpolar-1	20.085
							bdpolar-1	16.605
							bdpolar-1	19.192
							bdpolar-1	15.93
							bdpolar-1	22.548
							bdpolar-1	26.022
							bdpolar-1	26.965
							bdpolar-1	25.204
							bdpolar-1	23.601
							bdpolar-1	25.204
							bdpolar-1	19.192
							bdpolar-1	21.584
							bdpolar-1	23.44
							bdpolar-1	23.07
							bdpolar-1	27.236
							bdpolar-1	26.056
							bdpolar-1	25.041
							bdpolar-1	25.672
							bdpolar-1	22.74
							bdpolar-1	26.809
							bdpolar-1	22.473
							bdpolar-1	25.235
							bdpolar-1	25.995
							bdpolar-1	23.674
							bdpolar-1	25.277
							bdpolar-1	29.301
							bdpolar-1	26.265
							bdpolar-1	25.699
							bdpolar-1	27.072
							bdpolar-1	27.267
							bdpolar-1	24.346
							bdpolar-1	26.086
							bdpolar-1	26.408
							bdpolar-1	22.592
							bdpolar-1	22.115
							bdpolar-1	28.904
							bdpolar-1	20.578
							bdpolar-1	23.043
							bdpolar-1	20.257
							bdpolar-1	20.113
							bdpolar-1	25.607
							bdpolar-1	22.226
							bdpolar-1	23.657
							bdpolar-1	18.541
							bdpolar-1	20.09
							bdpolar-1	22.396
							bdpolar-1	20.478
							bdpolar-1	24.477
							bdpolar-1	18.894
							bdpolar-1	24.731
							bdpolar-1	22.034
							bdpolar-1	19.827
							bdpolar-1	24.661
							bdpolar-1	23.981
							bdpolar-1	20.085
							bdpolar-1	24.629
							bdpolar-1	26.573
							bdpolar-1	25.941
							bdpolar-1	21.797
							bdpolar-1	23.233
							bdpolar-1	21.797
							bdpolar-1	19.659
							bdpolar-1	21.396
							bdpolar-1	20.1
							bdpolar-1	25.845
							bdpolar-1	25.729
							bdpolar-1	25.617
							bdpolar-1	23.654
							bdpolar-1	20.829
							bdpolar-1	18.218
							bdpolar-1	28.193
							bdpolar-1	25.631
							bdpolar-1	16.899
							bdpolar-1	23.063
							bdpolar-1	18.495
							bdpolar-1	25.631
							bdpolar-1	23.411
							bdpolar-1	28.846
							bdpolar-1	25.729
							bdpolar-1	25.003
							bdpolar-1	20.437
							bdpolar-1	25.941
							bdpolar-1	25.601
							bdpolar-1	26.588
							bdpolar-1	23.006
							bdpolar-1	28.632
							bdpolar-1	22.703
							bdpolar-1	18.805
							bdpolar-1	24.635
							bdpolar-1	25.407
							bdpolar-1	25.995
							bdpolar-1	23.027
							bdpolar-1	22.12
							bdpolar-1	22.056
							bdpolar-1	23.411
							bdpolar-1	24.703
							bdpolar-1	21.447
							bdpolar-1	23.474
							bdpolar-1	20.1
							bdpolar-1	20.437
							bdpolar-1	21.418
							bdpolar-1	21.875
							bdpolar-1	19.605
							bdpolar-1	20.345
							bdpolar-1	25.47
							bdpolar-1	22.137
							bdpolar-1	22.117
							bdpolar-1	21.651
							bdpolar-1	22.115
							bdpolar-1	23.205
							bdpolar-1	20.262
							bdpolar-1	19.615
							bdpolar-1	20.9
							bdpolar-1	22.361
							bdpolar-1	17.751
							bdpolar-1	22.132
							bdpolar-1	21.511
							bdpolar-1	23.696
							bdpolar-1	23.252
							bdpolar-1	22.398
							bdpolar-1	24.228
							bdpolar-1	22.776
							bdpolar-1	19.453
							bdpolar-1	23.021
							bdpolar-1	19.551
							bdpolar-1	24.181
							bdpolar-1	22.856
							bdpolar-1	24.94
							bdpolar-1	25.431
							bdpolar-1	26.065
							bdpolar-1	23.087
							bdpolar-1	23.587
							bdpolar-1	22.7
							bdpolar-1	20.097
							bdpolar-1	20.255
							bdpolar-1	20.751
							bdpolar-1	22.24
							bdpolar-1	23.331
							bdpolar-1	22.359
							bdpolar-1	24.929
							bdpolar-1	23.7
							bdpolar-1	18.87
							bdpolar-1	23.696
							bdpolar-1	22.049
							bdpolar-1	25.449
							bdpolar-1	19.448
							bdpolar-1	21.318
							bdpolar-1	20.823
							bdpolar-1	22.649
							bdpolar-1	20.607
							bdpolar-1	22.512
							bdpolar-1	19.038
							bdpolar-1	20.415
							bdpolar-1	18.47
							bdpolar-1	18.85
							bdpolar-1	19.143
							bdpolar-1	22.117
							bdpolar-1	18.552
							bdpolar-1	18.379
							bdpolar-1	18.658
							bdpolar-1	18.349
							bdpolar-1	20.004
							bdpolar-1	20.598
							bdpolar-1	22.905
							bdpolar-1	21.459
							bdpolar-1	20.596
							bdpolar-1	21.348
							bdpolar-1	20.76
							bdpolar-1	19.368
							bdpolar-1	18.374
							bdpolar-1	22.124
							bdpolar-1	23.535
							bdpolar-1	17.255
							bdpolar-1	21.021
							bdpolar-1	24.028
							bdpolar-1	19.628
							bdpolar-1	21.335
							bdpolar-1	22.025
							bdpolar-1	22.117
							bdpolar-1	22.385
							bdpolar-1	19.832
							bdpolar-1	17.834
							bdpolar-1	19.808
							bdpolar-1	22.859
							bdpolar-1	18.714
							bdpolar-1	19.848
							bdpolar-1	21.237
							bdpolar-1	20.033
							bdpolar-1	20.09
							bdpolar-1	20.577
							bdpolar-1	25.29
							bdpolar-1	19.113
							bdpolar-1	21.065
							bdpolar-1	23.736
							bdpolar-1	22.814
							bdpolar-1	22.368
							bdpolar-1	21.668
							bdpolar-1	23.251
							bdpolar-1	20.113
							bdpolar-1	20.404
							bdpolar-1	23.237
							bdpolar-1	23.69
							bdpolar-1	23.428
							bdpolar-1	25.424
							bdpolar-1	24.57
							bdpolar-1	24.2
							bdpolar-1	26.076
							bdpolar-1	22.971
							bdpolar-1	22.238
							bdpolar-1	23.578
							bdpolar-1	20.437
							bdpolar-1	24.951
							bdpolar-1	25.113
							bdpolar-1	26.174
							bdpolar-1	20.739
							bdpolar-1	18.798
							bdpolar-1	25.126
							bdpolar-1	27.144
							bdpolar-1	19.041
							bdpolar-1	23.98
							bdpolar-1	25.545
							bdpolar-1	20.322
							bdpolar-1	24.824
							bdpolar-1	23.589
							bdpolar-1	22.118
							bdpolar-1	23.985
							bdpolar-1	22.53
							bdpolar-1	22.949
							bdpolar-1	26.747
							bdpolar-1	24.807
							bdpolar-1	25.038
							bdpolar-1	19.844
							bdpolar-1	21.902
							bdpolar-1	24.155
							bdpolar-1	20.172
							bdpolar-1	25.866
							bdpolar-1	22.472
							bdpolar-1	23.337
							bdpolar-1	24.951
							bdpolar-1	20.741
							bdpolar-1	23.985
							bdpolar-1	25.193
							bdpolar-1	24.142
							bdpolar-1	25.525
							bdpolar-1	20.966
							bdpolar-1	21.333
							bdpolar-1	21.511
							bdpan1-1	19.216
							bdpan1-1	19.252
							bdpan1-1	18.752
							bdpan1-1	20.1
							bdpan1-1	18.541
							bdpan1-1	21.425
							bdpan1-1	22.342
							bdpan1-1	23.583
							bdpan1-1	18.972
							bdpan1-1	25.16
							bdpan1-1	22.913
							bdpan1-1	16.85
							bdpan1-1	22.88
							bdpan1-1	22.564
							bdpan1-1	21.691
							bdpan1-1	21.749
							bdpan1-1	18.838
							bdpan1-1	16.462
							bdpan1-1	21.408
							bdpan1-1	18.495
							bdpan1-1	23.118
							bdpan1-1	22.765
							bdpan1-1	22.321
							bdpan1-1	19.447
							bdpan1-1	25.678
							bdpan1-1	25.235
							bdpan1-1	23.763
							bdpan1-1	22.186
							bdpan1-1	23.118
							bdpan1-1	22.682
							bdpan1-1	26.408
							bdpan1-1	24.932
							bdpan1-1	22.691
							bdpan1-1	22.056
							bdpan1-1	20.67
							bdpan1-1	22.433
							bdpan1-1	25.326
							bdpan1-1	20.085
							bdpan1-1	24.196
							bdpan1-1	21.749
							bdpan1-1	19.339
							bdpan1-1	19.574
							bdpan1-1	27.697
							bdpan1-1	18.558
							bdpan1-1	20.67
							bdpan1-1	16.114
							bdpan1-1	19.071
							bdpan1-1	20.03
							bdpan1-1	25.326
							bdpan1-1	23.152
							bdpan1-1	21.396
							bdpan1-1	18.699
							bdpan1-1	22.795
							bdpan1-1	20.184
							bdpan1-1	21.31
							bdpan1-1	19.162
							bdpan1-1	21.506
							bdpan1-1	24.953
							bdpan1-1	22.186
							bdpan1-1	22.179
							bdpan1-1	19.71
							bdpan1-1	22.037
							bdpan1-1	22.417
							bdpan1-1	19.769
							bdpan1-1	19.777
							bdpan1-1	24.311
							bdpan1-1	25.65
							bdpan1-1	21.084
							bdpan1-1	14.993
							bdpan1-1	22.396
							bdpan1-1	22.691
							bdpan1-1	22.592
							bdpan1-1	20.417
							bdpan1-1	24.959
							bdpan1-1	23.71
							bdpan1-1	23.351
							bdpan1-1	23.027
							bdpan1-1	24.969
							bdpan1-1	20.132
							bdpan1-1	25.764
							bdpan1-1	17.174
							bdpan1-1	23.411
							bdpan1-1	23.118
							bdpan1-1	20.424
							bdpan1-1	21.72
							bdpan1-1	19.808
							bdpan1-1	21.506
							bdpan1-1	22.271
							bdpan1-1	24.984
							bdpan1-1	24.68
							bdpan1-1	23.796
							bdpan1-1	18.515
							bdpan1-1	20.28
							bdpan1-1	24.44
							bdpan1-1	20.145
							bdpan1-1	25.764
							bdpan1-1	20.506
							bdpan1-1	24.026
							bdpan1-1	21.425
							bdpan1-1	25.176
							bdpan1-1	22.035
							bdpan1-1	22.902
							bdpan1-1	20.829
							bdpan1-1	18.106
							bdpan1-1	22.675
							bdpan1-1	19.737
							bdpan1-1	22.506
							bdpan1-1	23.726
							bdpan1-1	19.694
							bdpan1-1	19.563
							bdpan1-1	22.406
							bdpan1-1	20.96
							bdpan1-1	19.33
							bdpan1-1	21.344
							bdpan1-1	20.729
							bdpan1-1	16.859
							bdpan1-1	18.608
							bdpan1-1	22.203
							bdpan1-1	17.427
							bdpan1-1	19.497
							bdpan1-1	18.795
							bdpan1-1	23.44
							bdpan1-1	21.528
							bdpan1-1	18.006
							bdpan1-1	19.932
							bdpan1-1	21.714
							bdpan1-1	21.8
							bdpan1-1	24.251
							bdpan1-1	18.181
							bdpan1-1	18.85
							bdpan1-1	19.248
							bdpan1-1	20.982
							bdpan1-1	21.795
							bdpan1-1	22.943
							bdpan1-1	20.2
							bdpan1-1	17.436
							bdpan1-1	19.422
							bdpan1-1	15.695
							bdpan1-1	21.63
							bdpan1-1	20.71
							bdpan1-1	19.645
							bdpan1-1	16.607
							bdpan1-1	21.1
							bdpan1-1	19.485
							bdpan1-1	19.286
							bdpan1-1	21.953
							bdpan1-1	23.573
							bdpan1-1	22.383
							bdpan1-1	22.795
							bdpan1-1	17.097
							bdpan1-1	21.797
							bdpan1-1	18.419
							bdpan1-1	18.717
							bdpan1-1	25.433
							bdpan1-1	21.362
							bdpan1-1	21.309
							bdpan1-1	21.101
							bdpan1-1	21.702
							bdpan1-1	22.347
							bdpan1-1	17.609
							bdpan1-1	20.846
							bdpan1-1	21.631
							bdpan1-1	16.559
							bdpan1-1	18.305
							bdpan1-1	19.791
							bdpan1-1	24.471
							bdpan1-1	25.193
							bdpan1-1	24.999
							bdpan1-1	19.814
							bdpan1-1	24.577
							bdpan1-1	22.787
							bdpan1-1	20.218
							bdpan1-1	21.112
							bdpan1-1	27.705
							bdpan1-1	23.139
							bdpan1-1	20.117
							bdpan1-1	20.062
							bdpan1-1	20.698
							bdpan1-1	24.552
							bdpan1-1	18.635
							bdpan1-1	19.137
							bdpan1-1	18.983
							bdpan1-1	23.512
							bdpan1-1	19.895
							bdpan1-1	18.16
							bdpan1-1	26.275
							bdpan1-1	21.144
							bdpan1-1	21.576
							bdpan1-1	22.845
							bdpan1-1	24.919
							bdpan1-1	19.096
							bdpan1-1	21.631
							bdpan1-1	23.695
							bdpan1-1	23.467
							bdpan1-1	19.758
							bdpan1-1	18.399
							bdpan1-1	22.149
							bdpan1-1	24.073
							bdpan1-1	20.616
							bdpan1-1	18.64
							bdpan1-1	26.103
							bdpan1-1	24.484
							bdpan1-1	26.338
							bdpan1-1	23.099
							bdpan1-1	21.911
							bdpan1-1	25.343
							bdpan1-1	23.995
							bdpan1-1	24.232
							bdpan1-1	27.636
							bdpan1-1	22.002
							bdpan1-1	22.567
							bdpan1-1	21.716
							bdpan1-1	26.934
							bdpan1-1	25.194
							bdpan1-1	23.082
							bdpan1-1	21.799
							bdpan1-1	21.875
							bdpan1-1	22.015
							bdpan1-1	20.417
							bdpan1-1	21.034
							bdpan1-1	23.497
							bdpan1-1	21.875
							bdpan1-1	22.443
							bdpan1-1	20.558
							bdpan1-1	23.334
							bdpan1-1	22.211
							bdpan1-1	19.605
							bdpan1-1	23.819
							bdpan1-1	20.556
							bdpan1-1	24.888
							bdpan1-1	27.549
							bdpan1-1	21.416
							bdpan1-1	23.087
							bdpan1-1	21.978
							bdpan1-1	25.113
							bdpan1-1	24.005
							bdpan1-1	23.115
							bdpan1-1	21.468
							bdpan1-1	20.392
							bdpan1-1	23.366
							bdpan1-1	23.185
							bdpan1-1	26.226
							bdpan1-1	22.202
							bdpan1-1	22.578
							bdpan1-1	19.537
							bdpan1-1	21.587
							bdpan1-1	20.118
							bdpan1-1	24.215
							bdpan1-1	31.027
							bdpan1-1	23.924
							bdpan1-1	18.738
							bdpan1-1	24.212
							bdpolar-1;bdpan1-1	19.129
							bdpolar-1;bdpan1-1	25.419
							bdpolar-1;bdpan1-1	19.129
							bdpolar-1;bdpan1-1	17.137
							bdpolar-1;bdpan1-1	21.931
							bdpolar-1;bdpan1-1	20.301
							bdpolar-1;bdpan1-1	19.71
							bdpolar-1;bdpan1-1	19.678
							bdpolar-1;bdpan1-1	18.838
							bdpolar-1;bdpan1-1	23.07
							bdpolar-1;bdpan1-1	17.763
							bdpolar-1;bdpan1-1	22.703
							bdpolar-1;bdpan1-1	18.628
							bdpolar-1;bdpan1-1	19.766
							bdpolar-1;bdpan1-1	18.344
							bdpolar-1;bdpan1-1	16.273
							bdpolar-1;bdpan1-1	20.04
							bdpolar-1;bdpan1-1	24.285
							bdpolar-1;bdpan1-1	19.896
							bdpolar-1;bdpan1-1	23.991
							bdpolar-1;bdpan1-1	20.435
							bdpolar-1;bdpan1-1	23.767
							bdpolar-1;bdpan1-1	25.845
							bdpolar-1;bdpan1-1	21.109
							bdpolar-1;bdpan1-1	21.012
							bdpolar-1;bdpan1-1	22.878
							bdpolar-1;bdpan1-1	20.04
							bdpolar-1;bdpan1-1	15.881
							bdpolar-1;bdpan1-1	18.515
							bdpolar-1;bdpan1-1	20.708
							bdpolar-1;bdpan1-1	20.21
							bdpolar-1;bdpan1-1	22.694
							bdpolar-1;bdpan1-1	20.145
							bdpolar-1;bdpan1-1	22.641
							bdpolar-1;bdpan1-1	21.231
							bdpolar-1;bdpan1-1	23.972
							bdpolar-1;bdpan1-1	18.972
							bdpolar-1;bdpan1-1	23.734
							bdpolar-1;bdpan1-1	20.92
							bdpolar-1;bdpan1-1	21.3
							bdpolar-1;bdpan1-1	21.376
							bdpolar-1;bdpan1-1	25.237
							bdpolar-1;bdpan1-1	22.48
							bdpolar-1;bdpan1-1	16.253
							bdpolar-1;bdpan1-1	21.263
							bdpolar-1;bdpan1-1	19.143
							bdpolar-1;bdpan1-1	26.124
							bdpolar-1;bdpan1-1	21.389
							bdpolar-1;bdpan1-1	17.158
							bdpolar-1;bdpan1-1	20.578
							bdpolar-1;bdpan1-1	18.699
							bdpolar-1;bdpan1-1	20.54
							bdpolar-1;bdpan1-1	22.496
							bdpolar-1;bdpan1-1	20.596
							bdpolar-1;bdpan1-1	16.825
							bdpolar-1;bdpan1-1	16.36
							bdpolar-1;bdpan1-1	17.048
							bdpolar-1;bdpan1-1	18.894
							bdpolar-1;bdpan1-1	15.768
							bdpolar-1;bdpan1-1	18.379
							bdpolar-1;bdpan1-1	23.411
							bdpolar-1;bdpan1-1	20.621
							bdpolar-1;bdpan1-1	20.506
							bdpolar-1;bdpan1-1	23.267
							bdpolar-1;bdpan1-1	18.47
							bdpolar-1;bdpan1-1	23.657
							bdpolar-1;bdpan1-1	16.205
							bdpolar-1;bdpan1-1	21.062
							bdpolar-1;bdpan1-1	16.681
							bdpolar-1;bdpan1-1	17.54
							bdpolar-1;bdpan1-1	21.862
							bdpolar-1;bdpan1-1	18.628
							bdpolar-1;bdpan1-1	18.628
							bdpolar-1;bdpan1-1	20.257
							bdpolar-1;bdpan1-1	22.006
							bdpolar-1;bdpan1-1	20.03
							bdpolar-1;bdpan1-1	19.339
							bdpolar-1;bdpan1-1	18.157
							bdpolar-1;bdpan1-1	22.508
							bdpolar-1;bdpan1-1	20.437
							bdpolar-1;bdpan1-1	20.424
							bdpolar-1;bdpan1-1	23.449
							bdpolar-1;bdpan1-1	18.313
							bdpolar-1;bdpan1-1	19.861
							bdpolar-1;bdpan1-1	16.253
							bdpolar-1;bdpan1-1	20.404
							bdpolar-1;bdpan1-1	14.757
							bdpolar-1;bdpan1-1	21.065
							bdpolar-1;bdpan1-1	20.748
							bdpolar-1;bdpan1-1	19.964
							bdpolar-1;bdpan1-1	24.302
							bdpolar-1;bdpan1-1	17.683
							bdpolar-1;bdpan1-1	22.375
							bdpolar-1;bdpan1-1	26.693
							bdpolar-1;bdpan1-1	22.592
							bdpolar-1;bdpan1-1	24.196
							bdpolar-1;bdpan1-1	20.085
							bdpolar-1;bdpan1-1	18.549
							bdpolar-1;bdpan1-1	21.931
							bdpolar-1;bdpan1-1	24.925
							bdpolar-1;bdpan1-1	21.616
							bdpolar-1;bdpan1-1	25.07
							bdpolar-1;bdpan1-1	19.766
							bdpolar-1;bdpan1-1	17.629
							bdpolar-1;bdpan1-1	18.076
							bdpolar-1;bdpan1-1	20.621
							bdpolar-1;bdpan1-1	22.001
							bdpolar-1;bdpan1-1	21.376
							bdpolar-1;bdpan1-1	20.609
							bdpolar-1;bdpan1-1	18.963
							bdpolar-1;bdpan1-1	17.939
							bdpolar-1;bdpan1-1	19.26
							bdpolar-1;bdpan1-1	17.501
							bdpolar-1;bdpan1-1	24.919
							bdpolar-1;bdpan1-1	24.756
							bdpolar-1;bdpan1-1	21.864
							bdpolar-1;bdpan1-1	19.574
							bdpolar-1;bdpan1-1	17.795
							bdpolar-1;bdpan1-1	18.752
							bdpolar-1;bdpan1-1	23.197
							bdpolar-1;bdpan1-1	20.437
							bdpolar-1;bdpan1-1	18.287
							bdpolar-1;bdpan1-1	19.509
							bdpolar-1;bdpan1-1	17.42
							bdpolar-1;bdpan1-1	21.3
							bdpolar-1;bdpan1-1	20.801
							bdpolar-1;bdpan1-1	17.573
							bdpolar-1;bdpan1-1	22.814
							bdpolar-1;bdpan1-1	18.25
							bdpolar-1;bdpan1-1	23.106
							bdpolar-1;bdpan1-1	20.67
							bdpolar-1;bdpan1-1	20.298
							bdpolar-1;bdpan1-1	23.902
							bdpolar-1;bdpan1-1	22.346
							bdpolar-1;bdpan1-1	17.42
							bdpolar-1;bdpan1-1	18.572
							bdpolar-1;bdpan1-1	22.134
							bdpolar-1;bdpan1-1	19.019
							bdpolar-1;bdpan1-1	24.285
							bdpolar-1;bdpan1-1	24.592
							bdpolar-1;bdpan1-1	22.084
							bdpolar-1;bdpan1-1	17.795
							bdpolar-1;bdpan1-1	23.278
							bdpolar-1;bdpan1-1	20.99
							bdpolar-1;bdpan1-1	18.287
							bdpolar-1;bdpan1-1	23.514
							bdpolar-1;bdpan1-1	19.988
							bdpolar-1;bdpan1-1	21.691
							bdpolar-1;bdpan1-1	25.637
							bdpolar-1;bdpan1-1	20.67
							bdpolar-1;bdpan1-1	24.395
							bdpolar-1;bdpan1-1	25.166
							bdpolar-1;bdpan1-1	20.255
							bdpolar-1;bdpan1-1	19.523
							bdpolar-1;bdpan1-1	24.304
							bdpolar-1;bdpan1-1	19.052
							bdpolar-1;bdpan1-1	15.979
							bdpolar-1;bdpan1-1	15.251
							bdpolar-1;bdpan1-1	15.554
							bdpolar-1;bdpan1-1	20.123
							bdpolar-1;bdpan1-1	16.493
							bdpolar-1;bdpan1-1	21.323
							bdpolar-1;bdpan1-1	19.038
							bdpolar-1;bdpan1-1	17.276
							bdpolar-1;bdpan1-1	21.382
							bdpolar-1;bdpan1-1	22.678
							bdpolar-1;bdpan1-1	20.91
							bdpolar-1;bdpan1-1	17.255
							bdpolar-1;bdpan1-1	22.443
							bdpolar-1;bdpan1-1	19.567
							bdpolar-1;bdpan1-1	19.9
							bdpolar-1;bdpan1-1	23.472
							bdpolar-1;bdpan1-1	24.557
							bdpolar-1;bdpan1-1	18.47
							bdpolar-1;bdpan1-1	16.386
							bdpolar-1;bdpan1-1	21.428
							bdpolar-1;bdpan1-1	15.527
							bdpolar-1;bdpan1-1	18.429
							bdpolar-1;bdpan1-1	18.747
							bdpolar-1;bdpan1-1	21.636
							bdpolar-1;bdpan1-1	24.919
							bdpolar-1;bdpan1-1	21.205
							bdpolar-1;bdpan1-1	26.866
							bdpolar-1;bdpan1-1	19.216
							bdpolar-1;bdpan1-1	17.592
							bdpolar-1;bdpan1-1	22.44
							bdpolar-1;bdpan1-1	21.433
							bdpolar-1;bdpan1-1	15.49
							bdpolar-1;bdpan1-1	20.906
							bdpolar-1;bdpan1-1	20.306
							bdpolar-1;bdpan1-1	19.815
							bdpolar-1;bdpan1-1	20.8
							bdpolar-1;bdpan1-1	19.179
							bdpolar-1;bdpan1-1	24.975
							bdpolar-1;bdpan1-1	21.224
							bdpolar-1;bdpan1-1	22.588
							bdpolar-1;bdpan1-1	19.466
							bdpolar-1;bdpan1-1	17.105
							bdpolar-1;bdpan1-1	23.012
							bdpolar-1;bdpan1-1	19.327
							bdpolar-1;bdpan1-1	23.655
							bdpolar-1;bdpan1-1	22.087
							bdpolar-1;bdpan1-1	20.434
							bdpolar-1;bdpan1-1	20.341
							bdpolar-1;bdpan1-1	20.676
							bdpolar-1;bdpan1-1	22.7
							bdpolar-1;bdpan1-1	20.103
							bdpolar-1;bdpan1-1	19.728
							bdpolar-1;bdpan1-1	19.621
							bdpolar-1;bdpan1-1	17.408
							bdpolar-1;bdpan1-1	21.883
							bdpolar-1;bdpan1-1	24.852
							bdpolar-1;bdpan1-1	19.853
							bdpolar-1;bdpan1-1	20.103
							bdpolar-1;bdpan1-1	19.966
							bdpolar-1;bdpan1-1	22.994
							bdpolar-1;bdpan1-1	20.016
							bdpolar-1;bdpan1-1	20.258
							bdpolar-1;bdpan1-1	19.617
							bdpolar-1;bdpan1-1	23.741
							bdpolar-1;bdpan1-1	23.737
							bdpolar-1;bdpan1-1	20.795
							bdpolar-1;bdpan1-1	21.88
							bdpolar-1;bdpan1-1	20.504
							bdpolar-1;bdpan1-1	19.459
							bdpolar-1;bdpan1-1	17.785
							bdpolar-1;bdpan1-1	21.885
							bdpolar-1;bdpan1-1	18.938
							bdpolar-1;bdpan1-1	22.36
							bdpolar-1;bdpan1-1	22.684
							bdpolar-1;bdpan1-1	21.774
							bdpolar-1;bdpan1-1	16.769
							bdpolar-1;bdpan1-1	20.776
							bdpolar-1;bdpan1-1	21.237
							bdpolar-1;bdpan1-1	20.149
							bdpolar-1;bdpan1-1	22.939
							bdpolar-1;bdpan1-1	23.889
							bdpolar-1;bdpan1-1	23.383
							bdpolar-1;bdpan1-1	27.25
							bdpolar-1;bdpan1-1	22.032
							bdpolar-1;bdpan1-1	24.013
							bdpolar-1;bdpan1-1	21.092
