# Supplementary material for: Opposite polarity programs regulate asymmetric subsidiary cell divisions in grasses
Source: eLife. 2022 Dec 20;11:e79913. doi: 10.7554/eLife.79913 (PMC9767456; doi:10.7554/eLife.79913)
Supplement: Figure 5—source data 1. [file elife-79913-fig5-data1.xlsx]

## Sheet: Overview
Date	Time	Genotype	Individual	Leaf Area
2021-02-01	11:46:00	WT	10	0.76
2021-02-02	11:29:00	polar/pan1	10	0.69
2021-02-02	12:52:00	WT	9	0.71
2021-02-02	14:39:00	polar	10	0.69
2021-02-03	10:08:00	pan1	10	0.8
2021-02-03	11:32:00	WT	8	0.76
2021-02-03	13:19:00	polar/pan1	9	0.74
2021-02-04	10:06:00	polar	9	0.85
2021-02-04	11:31:00	polar/pan1	7	0.71
2021-02-04	13:02:00	WT	6	0.81
2021-02-05	09:39:00	pan1	9	0.88
2021-03-08	08:41:00	pan1	4	0.62
2021-03-08	10:17:00	polar	2	0.55
2021-03-08	11:37:00	WT	8	0.61
18/10/2021	09:51:00	WT	1	0.57
18/10/2021	14:03:00	polar/pan1	1	0.49
22/10/2021	08:39:00	pan1	2	0.66
22/10/2021	10:19:00	polar	2	0.57
2021-12-06	11:31:00	polar/pan1	1	0.57
2021-12-07	09:44:00	pan1	1	0.55
2021-12-07	11:20:00	polar	1	0.53
2021-12-07	12:46:00	WT	3	0.54
Graphics overview
Graphic 1_polar/pan1			Graphic 2_polar			Graphic 3_pan1
polar/pan1	WT		polar	WT		pan1	WT
2021-02-02	2021-02-02		2021-02-02	2021-02-02		2021-02-03	2021-02-03
2021-02-03	2021-02-03		2021-02-04	2021-02-04		2021-02-05	2021-02-01
2021-02-04	2021-02-04		2021-03-08	2021-03-08		2021-03-08	2021-03-08
18/10/2021	18/10/2021		22/10/2021	18/10/2021		22/10/2021	18/10/2021
2021-12-06	2021-12-07		2021-12-07	2021-12-07		2021-12-07	2021-12-07
n=5, SD	n=5, SD		n=5, SD	n=5, SD		n=5, SD	n=5, SD

## Sheet: 1_polarpan1
Absolute gsw (n=5)
wt_9_02/02/2021_12:52	wt_8_03/02/2021_11:32	wt_6_04/02/2021_13:02	wt_1_18/10/2021_09:51	wt_3_07/12/2021_12:46	polar/pan1_10_02/02/2021_11:29	polar/pan1_9_03/02/2021_13:19	polar/pan1_7_04/02/2021_11:31	polar/pan1_1_18/10/2021_14:03	polar/pan1_1_06/12/2021_11:31
0.286095	0.27526	0.42174	0.154392	0.0570363	0.197374	0.336485	0.227445	0.18218	0.06684
0.270473	0.251441	0.319353	0.164651	0.0760528	0.196473	0.320985	0.231165	0.172595	0.107321
0.2861	0.259482	0.295306	0.18631	0.0787001	0.200101	0.303902	0.233478	0.177515	0.0930811
0.295472	0.26157	0.262421	0.189888	0.101453	0.203433	0.297731	0.236959	0.168274	0.084803
0.306032	0.272124	0.252543	0.20748	0.11634	0.205454	0.294135	0.239873	0.169271	0.0950702
0.313199	0.274781	0.249706	0.211655	0.131543	0.213914	0.292365	0.241553	0.176149	0.107216
0.322702	0.281244	0.258159	0.214939	0.142785	0.205433	0.291532	0.232121	0.174851	0.14096
0.332498	0.296024	0.265124	0.225843	0.172033	0.211881	0.292859	0.239489	0.175846	0.143894
0.341917	0.305177	0.266166	0.217923	0.168335	0.228564	0.287846	0.244693	0.184614	0.157843
0.344476	0.314994	0.279241	0.232083	0.172384	0.226727	0.290486	0.238289	0.181435	0.165708
0.35318	0.320026	0.287221	0.236076	0.177128	0.229146	0.290138	0.242707	0.182798	0.17819
0.357359	0.32424	0.290176	0.235587	0.187309	0.236189	0.289873	0.243291	0.186457	0.190065
0.362089	0.327685	0.304722	0.244078	0.179961	0.233643	0.290149	0.243434	0.188081	0.204988
0.365366	0.328075	0.308469	0.245747	0.178541	0.235987	0.283553	0.24323	0.190636	0.209471
0.3664	0.333302	0.311067	0.242076	0.172661	0.24139	0.285367	0.240632	0.192298	0.213332
0.357381	0.330321	0.317814	0.258141	0.168876	0.232072	0.284767	0.241278	0.194161	0.210511
0.364291	0.335863	0.323932	0.252166	0.166779	0.240426	0.28277	0.243106	0.198282	0.222691
0.364712	0.33722	0.326293	0.253727	0.163379	0.246594	0.282234	0.241865	0.196476	0.222949
0.364432	0.333905	0.325169	0.256017	0.161378	0.248798	0.279982	0.240445	0.210287	0.223243
0.363136	0.340886	0.343283	0.280927	0.158265	0.255397	0.276428	0.234225	0.239683	0.23914
0.300526	0.289638	0.282903	0.204375	0.160691	0.20886	0.231283	0.199398	0.172813	0.191736
0.279742	0.279	0.268174	0.247657	0.111725	0.217904	0.236843	0.190378	0.2044	0.181684
0.267005	0.288738	0.273189	0.241837	0.120041	0.217109	0.23612	0.205246	0.203068	0.169174
0.228482	0.272979	0.257122	0.220889	0.114315	0.205914	0.213995	0.195697	0.195898	0.154237
0.195587	0.248209	0.224326	0.196314	0.101476	0.193936	0.200093	0.180494	0.178561	0.130371
0.143505	0.21786	0.183798	0.189798	0.0927189	0.185068	0.177996	0.16744	0.166667	0.127329
0.116322	0.19013	0.165519	0.186444	0.0562607	0.170672	0.163539	0.158574	0.162611	0.11029
0.109041	0.176498	0.146147	0.187699	0.0681651	0.166628	0.160722	0.148292	0.169006	0.0852979
0.0843281	0.157205	0.126286	0.163596	0.0658576	0.14171	0.13802	0.137478	0.158345	0.0779879
0.0756005	0.133109	0.109923	0.152964	0.0593599	0.14019	0.126233	0.128349	0.160097	0.0624084
0.0747638	0.126905	0.103332	0.154369	0.0644378	0.135735	0.115862	0.120281	0.151475	0.0619882
0.063155	0.118694	0.0943738	0.142159	0.05753	0.123899	0.108143	0.110118	0.147614	0.0505808
0.0680539	0.114367	0.0911235	0.137982	0.0527777	0.112545	0.101697	0.103886	0.150395	0.0483353
0.0684982	0.112056	0.0917846	0.142512	0.0499896	0.113828	0.0961142	0.0984753	0.150892	0.0439044
0.0706762	0.111631	0.0907639	0.134714	0.0346097	0.100937	0.091746	0.0942368	0.136384	0.0507657
0.0745098	0.112195	0.0890342	0.141861	0.0493413	0.103967	0.0882999	0.0897377	0.135391	0.0496065
0.079065	0.113784	0.0899467	0.13424	0.0481725	0.105489	0.0855459	0.0848256	0.131012	0.0492355
0.0805209	0.113356	0.0904672	0.139393	0.0461604	0.0940975	0.0847036	0.0820761	0.127138	0.0513158
0.0845193	0.1169	0.100283	0.13489	0.0462657	0.0784007	0.0736574	0.0851899	0.121718	0.0466301
0.0838324	0.125667	0.159899	0.129085	0.0447671	0.140709	0.135725	0.109982	0.117415	0.0531977
0.134303	0.162791	0.173376	0.200226	0.0439192	0.13724	0.124325	0.108178	0.168667	0.0816519
0.18378	0.207461	0.186201	0.235748	0.121554	0.119133	0.10266	0.10721	0.194212	0.0880991
0.184124	0.214044	0.198714	0.219463	0.0961554	0.123359	0.11215	0.105292	0.18328	0.103626
0.169978	0.195821	0.235642	0.194033	0.124849	0.121001	0.113212	0.11698	0.135564	0.120079
0.19372	0.227867	0.263243	0.218494	0.137911	0.136486	0.129281	0.128743	0.130456	0.136393
0.221249	0.25224	0.292849	0.240491	0.156608	0.151836	0.138787	0.139895	0.169302	0.149206
0.243976	0.277302	0.300163	0.260411	0.169623	0.156555	0.148355	0.150578	0.184227	0.161665
0.276942	0.297612	0.312763	0.266073	0.179107	0.159685	0.159171	0.15606	0.175671	0.169405
0.287558	0.312388	0.315053	0.27384	0.179923	0.16955	0.166305	0.16206	0.182477	0.17267
0.301498	0.319456	0.314261	0.276632	0.179229	0.170915	0.169501	0.16755	0.170419	0.179698
0.307194	0.31779	0.310967	0.276439	0.1804	0.177378	0.176805	0.178113	0.181694	0.185222
0.3116	0.32123	0.310837	0.273155	0.176802	0.184201	0.183869	0.179206	0.186303	0.184519
0.315433	0.322336	0.307908	0.278571	0.174334	0.18397	0.186203	0.180844	0.189176	0.185342
0.316005	0.319902	0.309799	0.270632	0.177341	0.181804	0.188494	0.181837	0.187548	0.176768
0.313956	0.316211	0.297133	0.279039	0.168463	0.190985	0.188187	0.185083	0.189562	0.188296
0.310698	0.308768	0.302857	0.275231	0.169424	0.184096	0.190348	0.189475	0.192436	0.1783
0.299722	0.29609	0.313262	0.273657	0.168187	0.190538	0.191275	0.185453	0.193924	0.189766
0.296161	0.300298	0.31749	0.27308	0.158565	0.190852	0.202823	0.188302	0.19657	0.195108
0.292368	0.298226	0.245211	0.28197	0.165143	0.203016	0.134038	0.135938	0.196246	0.166803
0.204614	0.289257	0.21366	0.200321	0.174697	0.144151	0.144147	0.136728	0.239949	0.152604
0.154731	0.210834	0.203098	0.245294	0.104314	0.146478	0.144702	0.135183	0.14741	0.129255
0.137552	0.169494	0.166429	0.23056	0.110128	0.146733	0.128042	0.116043	0.173157	0.10402
0.101842	0.170743	0.137583	0.20752	0.105233	0.132962	0.103595	0.0964179	0.178494	0.0843788
0.0722636	0.167704	0.104101	0.171592	0.0799252	0.113381	0.0828126	0.0809986	0.15856	0.0682149
0.038184	0.124884	0.0904991	0.139716	0.0536668	0.0960752	0.0701631	0.0816438	0.149319	0.0517757
0.026942	0.0688585	0.0821618	0.134419	0.0440667	0.0859459	0.0705883	0.0690112	0.141035	0.0469096
0.0228809	0.0538388	0.0822407	0.105753	0.031911	0.0780503	0.0653566	0.0567092	0.131526	0.0389452
0.0295219	0.0333865	0.0807962	0.085252	0.0255393	0.0754725	0.0503453	0.058016	0.125724	0.0323025
0.0202834	0.0379961	0.081266	0.098687	0.0213989	0.0690749	0.0506348	0.0431158	0.118354	0.0307224
0.0154102	0.0316228	0.0800776	0.07634	0.018969	0.0602055	0.0454762	0.038333	0.111784	0.0369198
0.0137625	0.0287242	0.0859711	0.078573	0.0170013	0.0588568	0.0406448	0.0352296	0.109123	0.0241053
0.0126659	0.0259822	0.0831951	0.066467	0.0163824	0.0547436	0.0359287	0.033133	0.105282	0.0194185
0.0118712	0.0206305	0.0867241	0.073329	0.0150685	0.0475499	0.0333211	0.0309525	0.098386	0.0175315
0.0100011	0.0180403	0.0885782	0.07576	0.010108	0.0477321	0.0310628	0.0334686	0.092086	0.016054
0.00948986	0.0205517	0.0900943	0.072974	0.0115311	0.0446674	0.0282069	0.0244381	0.093624
0.00985809	0.0207521	0.0912745	0.071447	0.00644307	0.0432721	0.0263494	0.0215117	0.091316
0.00969682	0.0203498	0.0912423	0.068628		0.040666			0.09059
0.00900637	0.0202735		0.05933					0.090598

## Sheet: 2_polar
Absolute gsw (n=5)
wt_9_02/02/2021_12:52	wt_6_04/02/2021_13:02	wt_8_08/03/2021_11:37	wt_1_18/10/2021_09:51	wt_3_07/12/2021_12:46	polar_10_02/02/2021_14:39	polar_9_04/02/2021_10:06	polar_2_08/03/2021_10:17	polar_2_22/10/2021_10:19	polar_1_07/12/2021_11:02
0.286095	0.42174	0.334468	0.154392	0.0570363	0.525517	0.211912	0.224282	0.157243	0.0904727
0.270473	0.319353	0.290861	0.164651	0.0760528	0.467994	0.206269	0.178979	0.155422	0.101862
0.2861	0.295306	0.253952	0.18631	0.0787001	0.42589	0.21521	0.186163	0.164604	0.108792
0.295472	0.262421	0.246094	0.189888	0.101453	0.398688	0.224446	0.192829	0.166341	0.119644
0.306032	0.252543	0.22391	0.20748	0.11634	0.362832	0.227801	0.184795	0.173454	0.140002
0.313199	0.249706	0.226218	0.211655	0.131543	0.3425	0.236072	0.187799	0.179581	0.154909
0.322702	0.258159	0.227121	0.214939	0.142785	0.331374	0.2412	0.194668	0.185357	0.153798
0.332498	0.265124	0.231735	0.225843	0.172033	0.325617	0.247759	0.190451	0.201306	0.167314
0.341917	0.266166	0.237889	0.217923	0.168335	0.330083	0.253352	0.195307	0.207652	0.165702
0.344476	0.279241	0.242813	0.232083	0.172384	0.336447	0.25714	0.205717	0.204704	0.169596
0.35318	0.287221	0.251602	0.236076	0.177128	0.340239	0.257896	0.211243	0.207819	0.171448
0.357359	0.290176	0.254962	0.235587	0.187309	0.326647	0.265806	0.207245	0.212123	0.153334
0.362089	0.304722	0.262874	0.244078	0.179961	0.349186	0.265227	0.221182	0.213843	0.158689
0.365366	0.308469	0.24944	0.245747	0.178541	0.355477	0.272197	0.229337	0.223539	0.155805
0.3664	0.311067	0.277671	0.242076	0.172661	0.348622	0.269161	0.217584	0.225939	0.156864
0.357381	0.317814	0.276777	0.258141	0.168876	0.352459	0.276467	0.238701	0.226158	0.144862
0.364291	0.323932	0.26737	0.252166	0.166779	0.348802	0.270785	0.230746	0.222957	0.152465
0.364712	0.326293	0.272664	0.253727	0.163379	0.34622	0.275657	0.237075	0.233327	0.14802
0.364432	0.325169	0.276805	0.256017	0.161378	0.342464	0.276903	0.241385	0.237789	0.15072
0.363136	0.343283	0.282597	0.280927	0.158265	0.345825	0.276094	0.230285	0.240358	0.149665
0.300526	0.282903	0.229692	0.204375	0.160691	0.281782	0.266551	0.249327	0.184618	0.106075
0.279742	0.268174	0.230272	0.247657	0.111725	0.265164	0.235604	0.200908	0.214505	0.108333
0.267005	0.273189	0.246121	0.241837	0.120041	0.249535	0.220696	0.206844	0.222901	0.113319
0.228482	0.257122	0.240693	0.220889	0.114315	0.213664	0.229442	0.214075	0.206933	0.0852902
0.195587	0.224326	0.230939	0.196314	0.101476	0.1853	0.205501	0.198702	0.174694	0.074536
0.143505	0.183798	0.221085	0.189798	0.0927189	0.155149	0.185967	0.191839	0.156528	0.0674093
0.116322	0.165519	0.205353	0.186444	0.0562607	0.124473	0.161117	0.179524	0.157171	0.0516172
0.109041	0.146147	0.179846	0.187699	0.0681651	0.10504	0.146366	0.161371	0.143165	0.0429739
0.0843281	0.126286	0.16268	0.163596	0.0658576	0.091999	0.130466	0.152253	0.13251	0.0512553
0.0756005	0.109923	0.146275	0.152964	0.0593599	0.0831092	0.107532	0.147334	0.121809	0.0581357
0.0747638	0.103332	0.130069	0.154369	0.0644378	0.0711872	0.10468	0.127129	0.111228	0.0452772
0.063155	0.0943738	0.125816	0.142159	0.05753	0.0656357	0.0981289	0.122766	0.103931	0.0456328
0.0680539	0.0911235	0.113764	0.137982	0.0527777	0.0630794	0.0808062	0.121428	0.09672	0.0438547
0.0684982	0.0917846	0.104861	0.142512	0.0499896	0.0607208	0.0866656	0.111961	0.096096	0.0485727
0.0706762	0.0907639	0.0931964	0.134714	0.0346097	0.0592711	0.0843626	0.103061	0.090858	0.0443433
0.0745098	0.0890342	0.0812992	0.141861	0.0493413	0.0588416	0.0813899	0.102611	0.087318	0.0421049
0.079065	0.0899467	0.0946173	0.13424	0.0481725	0.0592414	0.0869472	0.107998	0.087791	0.0416062
0.0805209	0.0904672	0.0957006	0.139393	0.0461604	0.0612068	0.0737874	0.101415	0.086794	0.0344525
0.0845193	0.100283	0.0950929	0.13489	0.0462657	0.0610759	0.0857085	0.101891	0.08591	0.0456607
0.0838324	0.159899	0.0957753	0.129085	0.0447671	0.0675598	0.089254	0.0938557	0.084452	0.0945049
0.134303	0.173376	0.157865	0.200226	0.0439192	0.102819	0.102479	0.167302	0.151832	0.0934014
0.18378	0.186201	0.151632	0.235748	0.121554	0.135747	0.166098	0.15991	0.152063	0.0902663
0.184124	0.198714	0.189739	0.219463	0.0961554	0.134902	0.14338	0.159969	0.161697	0.093722
0.169978	0.235642	0.192737	0.194033	0.124849	0.123902	0.175133	0.15547	0.138138	0.1135
0.19372	0.263243	0.214462	0.218494	0.137911	0.144004	0.172778	0.176566	0.156336	0.136176
0.221249	0.292849	0.223065	0.240491	0.156608	0.156205	0.200253	0.201637	0.168046	0.142102
0.243976	0.300163	0.241633	0.260411	0.169623	0.173292	0.21993	0.211444	0.172506	0.149575
0.276942	0.312763	0.256616	0.266073	0.179107	0.206094	0.240579	0.217103	0.187928	0.154535
0.287558	0.315053	0.260057	0.27384	0.179923	0.223655	0.256056	0.227923	0.201097	0.156095
0.301498	0.314261	0.264951	0.276632	0.179229	0.241418	0.267003	0.235633	0.196042	0.161926
0.307194	0.310967	0.273144	0.276439	0.1804	0.246765	0.273544	0.235419	0.20804	0.155016
0.3116	0.310837	0.277232	0.273155	0.176802	0.258956	0.283544	0.241305	0.201916	0.156739
0.315433	0.307908	0.289139	0.278571	0.174334	0.266942	0.289533	0.250999	0.204946	0.154949
0.316005	0.309799	0.281796	0.270632	0.177341	0.271904	0.279752	0.25091	0.206368	0.148619
0.313956	0.297133	0.281231	0.279039	0.168463	0.275228	0.287492	0.24647	0.201379	0.152247
0.310698	0.302857	0.290016	0.275231	0.169424	0.276181	0.274491	0.252128	0.207091	0.150932
0.299722	0.313262	0.289483	0.273657	0.168187	0.273137	0.281778	0.252147	0.204304	0.14983
0.296161	0.31749	0.304465	0.27308	0.158565	0.276531	0.274518	0.24347	0.201693	0.146797
0.292368	0.245211	0.278456	0.28197	0.165143	0.265251	0.268604	0.24221	0.202958	0.167481
0.204614	0.21366	0.232233	0.200321	0.174697	0.195189	0.247938	0.199483	0.227607	0.0934913
0.154731	0.203098	0.224858	0.245294	0.104314	0.171295	0.198081	0.197844	0.152662	0.110887
0.137552	0.166429	0.218326	0.23056	0.110128	0.157405	0.186846	0.198003	0.164847	0.105658
0.101842	0.137583	0.206472	0.20752	0.105233	0.126061	0.163632	0.189306	0.159447	0.0811448
0.0722636	0.104101	0.191408	0.171592	0.0799252	0.0995839	0.143364	0.14357	0.127736	0.0602295
0.038184	0.0904991	0.17132	0.139716	0.0536668	0.0619817	0.115506	0.12884	0.10752	0.0388144
0.026942	0.0821618	0.147552	0.134419	0.0440667	0.0548014	0.0881572	0.121945	0.078649	0.028072
0.0228809	0.0822407	0.125428	0.105753	0.031911	0.0462949	0.0847432	0.109024	0.066113	0.0188188
0.0295219	0.0807962	0.097194	0.085252	0.0255393	0.043324	0.0692458	0.0959867	0.057318	0.0227772
0.0202834	0.081266	0.0793917	0.098687	0.0213989	0.0393756	0.0641803	0.0847547	0.048283	0.00808736
0.0154102	0.0800776	0.0668771	0.07634	0.018969	0.0371632	0.0605148	0.0721535	0.040856	0.00454145
0.0137625	0.0859711	0.058512	0.078573	0.0170013	0.0308192	0.0545548	0.0606252	0.03446	0.00301706
0.0126659	0.0831951	0.0481781	0.066467	0.0163824	0.0325851	0.0466561	0.0499026	0.028883	0.000356073
0.0118712	0.0867241	0.0404751	0.073329	0.0150685	0.0292901	0.0472026	0.0477366	0.022159	-0.000814933
0.0100011	0.0885782	0.029776	0.07576	0.010108	0.0277655	0.0444855	0.0569725	0.022267	-0.00442977
0.00948986	0.0900943	0.025798	0.072974	0.0115311	0.025379	0.0405373	0.0483652	0.020312	-0.00399717
0.00985809	0.0912745	0.0187205	0.071447	0.00644307	0.0241364	0.038153	0.0472122	0.020558	-0.00463168
0.00969682	0.0912423	0.0156657	0.068628		0.0238948	0.0370342		0.019876	-0.00141663
0.00900637			0.05933			0.0332008		0.023202

## Sheet: 3_pan1
Absolute gsw (n=4)
wt_8_03/02/2021_11:32	wt_10_01/02/2021_11:46	wt_8_08/03/2021_11:37	wt_1_18/10/2021_09:51	wt_3_07/12/2021_12:46	pan1_10_03/02/2021_10:08	pan1_9_05/02/2021_09:39	pan1_4_08/03/2021_08:41	pan1_2_22/10/2021_08:39	pan1_1_07/12/2021_9:44
0.27526	0.205536	0.334468	0.154392	0.0570363	0.164772	0.169404	0.104213	0.112575	0.133129
0.251441	0.203231	0.290861	0.164651	0.0760528	0.166072	0.137008	0.107318	0.11837	0.126648
0.259482	0.227004	0.253952	0.18631	0.0787001	0.165509	0.149693	0.125462	0.144228	0.134391
0.26157	0.237431	0.246094	0.189888	0.101453	0.175345	0.150128	0.139427	0.144224	0.124913
0.272124	0.249643	0.22391	0.20748	0.11634	0.182364	0.15254	0.143278	0.152188	0.126887
0.274781	0.261011	0.226218	0.211655	0.131543	0.18151	0.158088	0.154687	0.159711	0.13484
0.281244	0.273252	0.227121	0.214939	0.142785	0.190468	0.160053	0.149148	0.174682	0.137138
0.296024	0.268294	0.231735	0.225843	0.172033	0.189165	0.167734	0.158496	0.185515	0.139687
0.305177	0.283598	0.237889	0.217923	0.168335	0.194657	0.165325	0.16061	0.197167	0.143183
0.314994	0.287632	0.242813	0.232083	0.172384	0.198854	0.170731	0.169141	0.209423	0.144545
0.320026	0.285372	0.251602	0.236076	0.177128	0.198065	0.176071	0.164268	0.20584	0.135355
0.32424	0.295377	0.254962	0.235587	0.187309	0.202084	0.185465	0.164846	0.223091	0.136513
0.327685	0.292653	0.262874	0.244078	0.179961	0.204108	0.182501	0.167826	0.221789	0.137934
0.328075	0.29198	0.24944	0.245747	0.178541	0.205912	0.181069	0.16723	0.23013	0.139561
0.333302	0.296213	0.277671	0.242076	0.172661	0.207956	0.179954	0.171259	0.236919	0.147006
0.330321	0.286955	0.276777	0.258141	0.168876	0.202314	0.181085	0.171722	0.239317	0.137239
0.335863	0.293326	0.26737	0.252166	0.166779	0.211472	0.185598	0.172636	0.241418	0.142258
0.33722	0.293245	0.272664	0.253727	0.163379	0.20489	0.181192	0.176051	0.244502	0.141333
0.333905	0.280115	0.276805	0.256017	0.161378	0.214276	0.18481	0.178241	0.245649	0.140484
0.340886	0.264687	0.282597	0.280927	0.158265	0.213007	0.177368	0.187288	0.251186	0.155825
0.289638	0.216115	0.229692	0.204375	0.160691	0.166747	0.146394	0.145173	0.215121	0.115458
0.279	0.195118	0.230272	0.247657	0.111725	0.167104	0.139453	0.15742	0.226157	0.108619
0.288738	0.183687	0.246121	0.241837	0.120041	0.161673	0.139445	0.153872	0.217971	0.101655
0.272979	0.16714	0.240693	0.220889	0.114315	0.153576	0.132718	0.142493	0.207706	0.0874862
0.248209	0.132013	0.230939	0.196314	0.101476	0.136804	0.119586	0.136986	0.184411	0.0670455
0.21786	0.115119	0.221085	0.189798	0.0927189	0.119964	0.112845	0.116878	0.168727	0.0577955
0.19013	0.0976705	0.205353	0.186444	0.0562607	0.115827	0.0998958	0.113115	0.16048	0.0527785
0.176498	0.0805859	0.179846	0.187699	0.0681651	0.0982257	0.0923505	0.11305	0.148402	0.0463575
0.157205	0.065799	0.16268	0.163596	0.0658576	0.0975156	0.0851584	0.103718	0.13736	0.0409879
0.133109	0.059008	0.146275	0.152964	0.0593599	0.0939641	0.0761815	0.0973871	0.12572	0.0345943
0.126905	0.0558908	0.130069	0.154369	0.0644378	0.0813349	0.0670618	0.0922898	0.118387	0.0362627
0.118694	0.0479907	0.125816	0.142159	0.05753	0.0756717	0.0709159	0.0869223	0.109902	0.034209
0.114367	0.0493132	0.113764	0.137982	0.0527777	0.0825651	0.0644722	0.0830792	0.105605	0.0284603
0.112056	0.0512395	0.104861	0.142512	0.0499896	0.0772448	0.0611751	0.0822332	0.103245	0.0327183
0.111631	0.0605291	0.0931964	0.134714	0.0346097	0.0815352	0.0600963	0.0845282	0.105848	0.0331304
0.112195	0.0528013	0.0812992	0.141861	0.0493413	0.0822399	0.0644626	0.0836871	0.107627	0.0340226
0.113784	0.0616785	0.0946173	0.13424	0.0481725	0.0763904	0.0605931	0.0879894	0.102658	0.0348972
0.113356	0.0696415	0.0957006	0.139393	0.0461604	0.0845044	0.0616085	0.0849232	0.101216	0.0356551
0.1169	0.063739	0.0950929	0.13489	0.0462657	0.0848636	0.0602445	0.0816607	0.101044	0.0188238
0.125667	0.122269	0.0957753	0.129085	0.0447671	0.085552	0.0656231	0.136925	0.104302	0.0809919
0.162791	0.126406	0.157865	0.200226	0.0439192	0.122804	0.0731566	0.134192	0.157238	0.0789167
0.207461	0.138634	0.151632	0.235748	0.121554	0.153593	0.1116	0.131301	0.142299	0.0719121
0.214044	0.149492	0.189739	0.219463	0.0961554	0.147792	0.106417	0.131232	0.156934	0.0799822
0.195821	0.176202	0.192737	0.194033	0.124849	0.142213	0.100564	0.141889	0.157951	0.0949093
0.227867	0.196429	0.214462	0.218494	0.137911	0.153853	0.112193	0.163657	0.163269	0.112496
0.25224	0.217763	0.223065	0.240491	0.156608	0.175762	0.125656	0.173359	0.180711	0.123743
0.277302	0.22517	0.241633	0.260411	0.169623	0.189198	0.140653	0.181657	0.193302	0.128566
0.297612	0.242433	0.256616	0.266073	0.179107	0.201746	0.151198	0.190412	0.20917	0.132457
0.312388	0.254652	0.260057	0.27384	0.179923	0.20985	0.15487	0.193304	0.227808	0.132538
0.319456	0.26186	0.264951	0.276632	0.179229	0.215138	0.161127	0.196497	0.223806	0.127439
0.31779	0.253881	0.273144	0.276439	0.1804	0.22086	0.170156	0.199392	0.237774	0.128976
0.32123	0.265546	0.277232	0.273155	0.176802	0.224734	0.172548	0.198515	0.244248	0.129546
0.322336	0.254606	0.289139	0.278571	0.174334	0.227087	0.175928	0.198555	0.232304	0.126486
0.319902	0.253745	0.281796	0.270632	0.177341	0.230264	0.175207	0.193864	0.250219	0.123848
0.316211	0.252189	0.281231	0.279039	0.168463	0.230645	0.174401	0.202783	0.249743	0.120745
0.308768	0.241848	0.290016	0.275231	0.169424	0.231358	0.175434	0.198724	0.255313	0.122375
0.29609	0.240808	0.289483	0.273657	0.168187	0.234977	0.171172	0.198015	0.246938	0.116477
0.300298	0.22847	0.304465	0.27308	0.158565	0.228073	0.168537	0.194317	0.251376	0.123661
0.298226	0.220082	0.278456	0.28197	0.165143	0.227896	0.156474	0.157959	0.253929	0.060306
0.289257	0.162383	0.232233	0.200321	0.174697	0.180557	0.122134	0.15723	0.257272	0.0415232
0.210834	0.122806	0.224858	0.245294	0.104314	0.166609	0.114814	0.164467	0.212412	0.0352817
0.169494	0.109283	0.218326	0.23056	0.110128	0.180401	0.109441	0.154072	0.219132	0.0199658
0.170743	0.0896047	0.206472	0.20752	0.105233	0.155842	0.0871882	0.126758	0.217059	0.0194266
0.167704	0.057622	0.191408	0.171592	0.0799252	0.136216	0.0648914	0.121742	0.197424	0.0185669
0.124884	0.0458266	0.17132	0.139716	0.0536668	0.10981	0.0576973	0.111878	0.171624	0.0158709
0.0688585	0.0364423	0.147552	0.134419	0.0440667	0.097211	0.0460326	0.0996772	0.147148	0.0144844
0.0538388	0.0330757	0.125428	0.105753	0.031911	0.0884813	0.0433618	0.091885	0.133278	0.0150384
0.0333865	0.0275895	0.097194	0.085252	0.0255393	0.0934374	0.0405457	0.0849437	0.132308	0.0154153
0.0379961	0.0237078	0.0793917	0.098687	0.0213989	0.0755169	0.0365646	0.0758021	0.115084	0.0170005
0.0316228	0.0217393	0.0668771	0.07634	0.018969	0.076523	0.0347248	0.0661506	0.100386	0.0176705
0.0287242	0.0204393	0.058512	0.078573	0.0170013	0.0717284	0.0269481	0.0542714	0.090425	0.0165873
0.0259822	0.0188412	0.0481781	0.066467	0.0163824	0.0743031	0.0364905	0.0561264	0.085042	0.0162602
0.0206305	0.0194236	0.0404751	0.073329	0.0150685	0.070773	0.0262835	0.056626	0.080531	0.0159569
0.0180403	0.0179803	0.029776	0.07576	0.010108	0.0715404	0.0255548	0.0530624	0.083384	0.0150785
0.0205517	0.0196519	0.025798	0.072974	0.0115311	0.0704977	0.0249114	0.0483529	0.076182	0.0147929
0.0207521	0.0178078	0.0187205	0.071447	0.00644307	0.0698753	0.0242856	0.0430592	0.076076	0.0145446
0.0203498	0.0176486	0.0156657	0.068628		0.069287	0.0241558		0.068545
0.0202735			0.05933		0.0693681			0.064146
								0.065321

## Sheet: 1000 PAR
1000 PAR
	WT	WT	WT	WT	WT	polar/pan1	polar/pan1	polar/pan1	polar/pan1	polar/pan1
38	0.315433	0.322336	0.307908	0.278571	0.174334	0.18397	0.186203	0.180844	0.189176	0.185342
39	0.316005	0.319902	0.309799	0.270632	0.177341	0.181804	0.188494	0.181837	0.187548	0.176768
40	0.313956	0.316211	0.297133	0.279039	0.168463	0.190985	0.188187	0.185083	0.189562	0.188296
41	0.310698	0.308768	0.302857	0.275231	0.169424	0.184096	0.190348	0.189475	0.192436	0.1783
42	0.299722	0.29609	0.313262	0.273657	0.168187	0.190538	0.191275	0.185453	0.193924	0.189766
Mean	0.311163	0.312661	0.306192	0.275426	0.17155	0.186279	0.188901	0.184538	0.190529	0.183694		Ratio gsw mutant/wildtype
Mean genotype	0.275398					0.186788						0.678248
SD genotype	0.0600008					0.00288773
p value (Unpaired t-test)	0.0109
p value (paired t-test)	0.0281
	WT	WT	WT	WT	WT	polar	polar	polar	polar	polar
38	0.315433	0.307908	0.289139	0.278571	0.174334	0.266942	0.289533	0.250999	0.204946	0.154949
39	0.316005	0.309799	0.281796	0.270632	0.177341	0.271904	0.279752	0.25091	0.206368	0.148619
40	0.313956	0.297133	0.281231	0.279039	0.168463	0.275228	0.287492	0.24647	0.201379	0.152247
41	0.310698	0.302857	0.290016	0.275231	0.169424	0.276181	0.274491	0.252128	0.207091	0.150932
42	0.299722	0.313262	0.289483	0.273657	0.168187	0.273137	0.281778	0.252147	0.204304	0.14983
Mean	0.311163	0.306192	0.286333	0.275426	0.17155	0.272679	0.282609	0.250531	0.204818	0.151315		Ratio gsw mutant/wildtype
Mean genotype	0.270133					0.23239						0.860282
SD genotype	0.056993					0.0543313
p value (Unpaired t-test)	0.3191
p value (paired t-test)	0.0131
	WT	WT	WT	WT	WT	pan1	pan1	pan1	pan1	pan1
38	0.322336	0.254606	0.289139	0.278571	0.174334	0.227087	0.175928	0.198555	0.232304	0.126486
39	0.319902	0.253745	0.281796	0.270632	0.177341	0.230264	0.175207	0.193864	0.250219	0.123848
40	0.316211	0.252189	0.281231	0.279039	0.168463	0.230645	0.174401	0.202783	0.249743	0.120745
41	0.308768	0.241848	0.290016	0.275231	0.169424	0.231358	0.175434	0.198724	0.255313	0.122375
42	0.29609	0.240808	0.289483	0.273657	0.168187	0.234977	0.171172	0.198015	0.246938	0.116477
Mean	0.312661	0.248639	0.286333	0.275426	0.17155	0.230866	0.174428	0.198388	0.246903	0.121986		Ratio gsw mutant/wildtype
Mean genotype	0.258922					0.194515						0.751248
SD genotype	0.0539706					0.049358
p value (Unpaired t-test)	0.0834
p value (paired t-test)	0.0045
