# Supplementary material for: Opposite polarity programs regulate asymmetric subsidiary cell divisions in grasses
Source: eLife. 2022 Dec 20;11:e79913. doi: 10.7554/eLife.79913 (PMC9767456; doi:10.7554/eLife.79913)
Supplement: Supplementary file 1. [file elife-79913-supp1.xlsx]

## Sheet: Sheet1
Bd21_3	Bradi	baseMean	log2FoldChange	lfcSE	stat	pvalue	padj	wtdev_TPM	siddev_TPM	pacId	transcriptName	peptideName	Pfam	Panther	KOG	ec	KO	GO	Best.hit.arabi.name	arabi.symbol	arabi.defline	Best.hit.rice.name	rice.symbol	rice.defline
BdiBd21-3.4G0400900	Bradi4g28540	21.4449	-7.86207	1.24487	-6.31557	2.69e-10	7.54e-07	3.97694	0	38199532	BdiBd21-3.4G0400900.1	BdiBd21-3.4G0400900.1.p											NA
BdiBd21-3.4G0460900	Bradi4g33000	6.12673	-6.05379	1.42193	-4.25745	2.07e-05	0.016712	0.793241	0	38198797	BdiBd21-3.4G0460900.1	BdiBd21-3.4G0460900.1.p	PF02701	PTHR31992,PTHR31992:SF38				GO:0006355,GO:0003677	AT1G51700.1	ADOF1,DOF1	DOF zinc finger protein 1	LOC_Os09g29960.1	NA	dof zinc finger domain containing protein, putative, expressed
BdiBd21-3.2G0016400	Bradi2g01380	4.48691	-5.60354	1.50058	-3.73426	0.000188	0.09957	0.210068	0	38194150	BdiBd21-3.2G0016400.1	BdiBd21-3.2G0016400.1.p	PF04577	PTHR20961,PTHR20961:SF17	KOG4698	2.4.1.255	K18207	GO:0016757	AT3G18180.1		Glycosyltransferase family 61 protein	LOC_Os01g02900.1	NA	glycosyltransferase, putative, expressed
BdiBd21-3.3G0715200	Bradi3g54060	281.185	-3.60385	0.215337	-16.7359	7.18e-63	2.01e-58	24.4284	1.96934	38224726	BdiBd21-3.3G0715200.1	BdiBd21-3.3G0715200.1.p		PTHR33476,PTHR33476:SF3								LOC_Os02g55190.1	NA	expressed protein
BdiBd21-3.5G0127800	Bradi5g10357	32.1981	-2.87745	0.48942	-5.8793	4.12e-09	8.88e-06	1.85529	0.246654	38222311	BdiBd21-3.5G0127800.1	BdiBd21-3.5G0127800.1.p	PF12899	PTHR31916,PTHR31916:SF8		3.2.1.26		GO:0033926	AT4G09510.1	CINV2	cytosolic invertase 2	LOC_Os04g35280.1	NA	neutral/alkaline invertase, putative, expressed
BdiBd21-3.1G0597200	Bradi1g45600	274.301	-2.26431	0.224914	-10.0674	7.7e-24	7.19e-20	37.6287	7.64901	38208683	BdiBd21-3.1G0597200.1	BdiBd21-3.1G0597200.1.p	PF04674	PTHR31279,PTHR31279:SF8					AT5G64260.1	EXL2	EXORDIUM like 2	LOC_Os06g11650.1	NA	phosphate-induced protein 1 conserved region domain containing protein, expressed
BdiBd21-3.3G0747200	Bradi3g56507	34.8473	-2.0842	0.419298	-4.97068	6.67e-07	0.000886	3.66076	0.841113	38227324	BdiBd21-3.3G0747200.1	BdiBd21-3.3G0747200.1.p	PF05637	PTHR31311,PTHR31311:SF3	KOG4748	2.4.2.39		GO:0016757,GO:0016021	AT2G22900.1		Galactosyl transferase GMA12/MNN10 family protein	LOC_Os02g49140.1	NA	glycosyltransferase, putative, expressed
BdiBd21-3.2G0694800	Bradi2g54300	207.584	-2.07695	0.200554	-10.356	3.93e-25	5.51e-21	8.58596	1.98854	38192215	BdiBd21-3.2G0694800.1	BdiBd21-3.2G0694800.1.p	PF00005,PF01061	PTHR19241,PTHR19241:SF241				GO:0016887,GO:0005524,GO:0016020	AT3G55090.1		ABC-2 type transporter family protein	LOC_Os01g61940.1	NA	white-brown complex homolog protein, putative, expressed
BdiBd21-3.1G0065100	Bradi1g04970	22.9133	-2.0714	0.482244	-4.29533	1.74e-05	0.014816	1.17628	0.27623	38213624	BdiBd21-3.1G0065100.1	BdiBd21-3.1G0065100.1.p		PTHR33033,PTHR33033:SF23								LOC_Os09g38170.1	NA	expressed protein
BdiBd21-3.3G0180300	Bradi3g13630	205.638	-1.93337	0.197272	-9.80054	1.12e-22	7.85e-19	8.54786	2.17989	38228200	BdiBd21-3.3G0180300.1	BdiBd21-3.3G0180300.1.p	PF02365	PTHR31719,PTHR31719:SF15				GO:0006355,GO:0003677	AT2G02450.2	anac034,ANAC035,LOV1,NAC035	NAC domain containing protein 35	LOC_Os08g02160.1	NA	no apical meristem protein, putative, expressed
BdiBd21-3.2G0231300	Bradi2g17530	82.8829	-1.70856	0.324609	-5.26344	1.41e-07	0.000198	16.2131	4.85947	38189105	BdiBd21-3.2G0231300.1	BdiBd21-3.2G0231300.1.p	PF14368	PTHR33214,PTHR33214:SF5					AT3G18280.1		Bifunctional inhibitor/lipid-transfer protein/seed storage 2S albumin superfamily protein	LOC_Os05g47730.1	NA	LTPL153 - Protease inhibitor/seed storage/LTP family protein precursor, expressed
BdiBd21-3.1G0933500	Bradi1g69220	98.2139	-1.62126	0.242942	-6.67344	2.5e-11	7.78e-08	13.9417	4.40942	38211530	BdiBd21-3.1G0933500.1	BdiBd21-3.1G0933500.1.p	PF06404	PTHR33285,PTHR33285:SF4				GO:0008283,GO:0008083,GO:0005576	AT2G22860.1	ATPSK2,PSK2	phytosulfokine 2 precursor	LOC_Os03g12990.1	NA	phytosulfokines precursor, putative, expressed
BdiBd21-3.5G0123400	Bradi5g10027	118.668	-1.53964	0.286975	-5.36508	8.09e-08	0.000119	10.4214	3.4874	38221922	BdiBd21-3.5G0123400.1	BdiBd21-3.5G0123400.1.p	PF02496	PTHR33801,PTHR33801:SF6				GO:0006950				LOC_Os01g72900.1	NA	abscisic stress-ripening, putative, expressed
BdiBd21-3.1G0985800	Bradi1g73690	47.4845	-1.52702	0.346576	-4.40602	1.05e-05	0.009837	1.55827	0.526946	38213380	BdiBd21-3.1G0985800.1	BdiBd21-3.1G0985800.1.p	PF07762	PTHR33074,PTHR33074:SF13								LOC_Os03g07750.1	NA	expressed protein
BdiBd21-3.1G0885200	Bradi1g65780	134.671	-1.4824	0.311756	-4.75502	1.98e-06	0.002225	19.2695	6.73987	38211590	BdiBd21-3.1G0885200.1	BdiBd21-3.1G0885200.1.p	PF01679	PTHR21659,PTHR21659:SF25	KOG1773			GO:0016021	AT2G38905.1		Low temperature and salt responsive protein family	LOC_Os03g17790.1	NA	OsRCI2-5 - Putative low temperature and salt responsive protein, expressed
BdiBd21-3.3G0620900	Bradi3g46760	125.565	-1.30515	0.262999	-4.96257	6.96e-07	0.000886	2.90358	1.14835	38226533	BdiBd21-3.3G0620900.1	BdiBd21-3.3G0620900.1.p		PTHR31827,PTHR31827:SF4					AT5G64550.1		loricrin-related	LOC_Os02g36590.1	NA	CPuORF19 - conserved peptide uORF-containing transcript, expressed
BdiBd21-3.4G0445200	Bradi4g31740	150.164	-1.21075	0.212926	-5.68627	1.3e-08	2.27e-05	7.53675	3.18723	38201632	BdiBd21-3.4G0445200.1	BdiBd21-3.4G0445200.1.p		PTHR33385,PTHR33385:SF1					AT1G14630.1			LOC_Os09g27590.1	NA	expressed protein
BdiBd21-3.5G0343800	Bradi5g26150	160.197	-1.19532	0.199555	-5.98992	2.1e-09	4.9e-06	13.939	5.93437	38220715	BdiBd21-3.5G0343800.1	BdiBd21-3.5G0343800.1.p	PF08263,PF00560,PF13855	PTHR27000,PTHR27000:SF102	KOG4579	3.2.1.15		GO:0005515	AT5G23400.1		Leucine-rich repeat (LRR) family protein	LOC_Os04g58080.1	NA	polygalacturonase inhibitor 3 precursor, putative, expressed
BdiBd21-3.1G0472300	Bradi1g34930	106.031	-1.08792	0.252898	-4.30182	1.69e-05	0.014816	4.9403	2.27502	38214706	BdiBd21-3.1G0472300.1	BdiBd21-3.1G0472300.1.p	PF14368	PTHR33044,PTHR33044:SF1					AT1G18280.1		Bifunctional inhibitor/lipid-transfer protein/seed storage 2S albumin superfamily protein	LOC_Os06g49770.1	NA	LTPL86 - Protease inhibitor/seed storage/LTP family protein precursor, expressed
BdiBd21-3.2G0731800	Bradi2g57297	528.378	-1.02064	0.166132	-6.14356	8.07e-10	2.06e-06	21.734	10.4449	38191351	BdiBd21-3.2G0731800.1	BdiBd21-3.2G0731800.1.p	PF02365	PTHR31719,PTHR31719:SF24				GO:0006355,GO:0003677	AT2G02450.2	anac034,ANAC035,LOV1,NAC035	NAC domain containing protein 35	LOC_Os01g66490.1	NA	no apical meristem protein, putative, expressed
BdiBd21-3.3G0139100	Bradi3g10270	170.902	-1.01861	0.22723	-4.48274	7.37e-06	0.007123	6.29856	3.03087	38225308	BdiBd21-3.3G0139100.1	BdiBd21-3.3G0139100.1.p	PF03083	PTHR10791,PTHR10791:SF41	KOG1623		K15382		AT4G10850.1		Nodulin MtN3 family protein	LOC_Os02g19820.1	NA	nodulin MtN3 family protein, putative, expressed
BdiBd21-3.4G0549500	Bradi4g39520	261.441	-1.01057	0.255167	-3.96043	7.48e-05	0.049931	18.7353	9.0556	38198843	BdiBd21-3.4G0549500.1	BdiBd21-3.4G0549500.1.p		PTHR33595,PTHR33595:SF3					AT5G50360.1			LOC_Os12g13910.1	NA	expressed protein
BdiBd21-3.2G0109100	Bradi2g08310	113.481	-1.00487	0.251492	-3.99565	6.45e-05	0.04521	5.85496	2.8468	38193242	BdiBd21-3.2G0109100.1	BdiBd21-3.2G0109100.1.p	PF00201	PTHR11926,PTHR11926:SF399		2.4.1.91		GO:0016758,GO:0008152	AT1G07250.1	UGT71C4	UDP-glucosyl transferase 71C4	LOC_Os07g32620.1	NA	anthocyanidin 5,3-O-glucosyltransferase, putative, expressed
BdiBd21-3.5G0276900	Bradi5g21140	430.223	-0.98263	0.213013	-4.61299	3.97e-06	0.003973	10.1245	5.00305	38220650	BdiBd21-3.5G0276900.1	BdiBd21-3.5G0276900.1.p	PF00481	PTHR13832,PTHR13832:SF329	KOG0698	3.1.3.16	K17506	GO:0003824,GO:0006470,GO:0004722	AT4G28400.1		Protein phosphatase 2C family protein	LOC_Os04g52000.1	NA	protein phosphatase 2C, putative, expressed
BdiBd21-3.1G0182200	Bradi1g13680	823.237	-0.9339	0.133484	-6.99629	2.63e-12	1.05e-08	15.8377	8.0905	38209333	BdiBd21-3.1G0182200.2	BdiBd21-3.1G0182200.2.p	PF02045	PTHR12632,PTHR12632:SF9			K08064	GO:0006355,GO:0003700	AT3G05690.1	ATHAP2B,HAP2B,NF-YA2,UNE8	nuclear factor Y, subunit A2	LOC_Os12g42400.1	NA	nuclear transcription factor Y subunit, putative, expressed
BdiBd21-3.1G0979900	Bradi1g72960	476.067	-0.91424	0.135429	-6.75071	1.47e-11	5.15e-08	11.1894	5.79371	38211231	BdiBd21-3.1G0979900.2	BdiBd21-3.1G0979900.2.p	PF02045	PTHR12632,PTHR12632:SF16			K08064	GO:0006355,GO:0003700	AT3G14020.1	NF-YA6	nuclear factor Y, subunit A6	LOC_Os03g07880.1	NA	nuclear transcription factor Y subunit, putative, expressed
BdiBd21-3.1G0980300	Bradi1g72990	90.3469	-0.91286	0.23767	-3.84087	0.000123	0.076182	9.61881	4.97859	38208046	BdiBd21-3.1G0980300.1	BdiBd21-3.1G0980300.1.p	PF00847	PTHR31241,PTHR31241:SF3				GO:0006355,GO:0003700	AT3G57600.1		Integrase-type DNA-binding superfamily protein	LOC_Os03g07830.1	NA	AP2 domain containing protein, expressed
BdiBd21-3.1G0284000	Bradi1g21762	357.311	-0.88685	0.157012	-5.64832	1.62e-08	2.67e-05	6.86981	3.62498	38216711	BdiBd21-3.1G0284000.1	BdiBd21-3.1G0284000.1.p	PF02045	PTHR12632,PTHR12632:SF11	KOG1561		K08064	GO:0006355,GO:0003700	AT1G17590.1	NF-YA8	nuclear factor Y, subunit A8	LOC_Os07g41720.2	NA	nuclear transcription factor Y subunit, putative, expressed
BdiBd21-3.3G0026900	Bradi3g02257	105.559	-0.88281	0.230453	-3.83077	0.000128	0.076182	3.60889	1.91761	38232018	BdiBd21-3.3G0026900.1	BdiBd21-3.3G0026900.1.p	PF12937	PTHR32133,PTHR32133:SF137				GO:0005515	AT3G16210.1		F-box family protein	LOC_Os02g15160.1	NA	OsFBX40 - F-box domain containing protein, expressed
BdiBd21-3.2G0300000	Bradi2g22810	263.104	-0.86388	0.14745	-5.85881	4.66e-09	9.33e-06	11.8753	6.37456	38186556	BdiBd21-3.2G0300000.1	BdiBd21-3.2G0300000.1.p	PF00010	PTHR11969,PTHR11969:SF14				GO:0046983	AT3G24140.1	FMA	basic helix-loop-helix (bHLH) DNA-binding superfamily protein	LOC_Os05g50900.1	NA	helix-loop-helix DNA-binding protein, putative, expressed
BdiBd21-3.2G0041200	Bradi2g03160	475.329	-0.80649	0.138856	-5.80807	6.32e-09	1.18e-05	14.5785	8.14179	38192091	BdiBd21-3.2G0041200.1	BdiBd21-3.2G0041200.1.p	PF14389,PF04784	PTHR23054,PTHR23054:SF22					AT2G39690.1		Protein of unknown function, DUF547	LOC_Os01g05480.3	NA	expressed protein
BdiBd21-3.3G0281700	Bradi3g20106	787.405	-0.63392	0.169427	-3.74155	0.000183	0.098586	17.0075	10.6933	38228783	BdiBd21-3.3G0281700.1	BdiBd21-3.3G0281700.1.p											NA
BdiBd21-3.1G0997700	Bradi1g74640	490.508	-0.62488	0.158613	-3.93967	8.16e-05	0.053188	6.76226	4.28452	38205642	BdiBd21-3.1G0997700.1	BdiBd21-3.1G0997700.1.p	PF00005,PF01061	PTHR19241,PTHR19241:SF286				GO:0016887,GO:0005524,GO:0016020	AT5G06530.2		ABC-2 type transporter family protein	LOC_Os03g06139.1	NA	ABC-2 type transporter domain containing protein, expressed
BdiBd21-3.5G0072700	Bradi5g06120	591.043	-0.49836	0.132965	-3.74803	0.000178	0.097957	7.09731	4.90777	38222004	BdiBd21-3.5G0072700.2	BdiBd21-3.5G0072700.2.p											NA
BdiBd21-3.3G0757500	Bradi3g57320	737.069	-0.48906	0.112992	-4.32826	1.5e-05	0.01359	16.9103	11.7626	38224613	BdiBd21-3.3G0757500.4	BdiBd21-3.3G0757500.4.p	PF02045	PTHR12632,PTHR12632:SF10				GO:0006355,GO:0003700	AT1G54160.1	NF-YA5,NFYA5	nuclear factor Y, subunit A5	LOC_Os02g53620.1	NA	nuclear transcription factor Y subunit, putative, expressed
BdiBd21-3.5G0115200	Bradi5g09420	580.785	0.512216	0.128668	3.98091	6.87e-05	0.046933	9.04538	12.5811	38220007	BdiBd21-3.5G0115200.1	BdiBd21-3.5G0115200.1.p	PF08244,PF00251	PTHR31953,PTHR31953:SF3		3.2.1.26	K01193		AT3G52600.1	AtcwINV2,CWINV2	cell wall invertase 2	LOC_Os04g33740.1	NA	glycosyl hydrolases, putative, expressed
BdiBd21-3.4G0476500	Bradi4g34190	598.621	0.645301	0.172119	3.74916	0.000177	0.097957	20.9458	31.9388	38200714	BdiBd21-3.4G0476500.1	BdiBd21-3.4G0476500.1.p	PF13450	PTHR10961,PTHR10961:SF22	KOG2820		K00306		AT2G24580.1		FAD-dependent oxidoreductase family protein	LOC_Os09g32290.2	NA	FAD dependent oxidoreductase domain containing protein, expressed
BdiBd21-3.2G0336700	Bradi2g25527	139.759	0.696232	0.183152	3.8014	0.000144	0.084021	0.831546	1.31605	38186289	BdiBd21-3.2G0336700.3	BdiBd21-3.2G0336700.3.p	PF01156	PTHR12304,PTHR12304:SF6	KOG2938				AT5G18860.1		inosine-uridine preferring nucleoside hydrolase family protein	LOC_Os05g33644.1	NA	inosine-uridine preferring nucleoside hydrolase family protein, putative, expressed
BdiBd21-3.1G0962200	Bradi1g71500	159.908	0.73142	0.188874	3.87252	0.000108	0.068621	2.0013	3.24599	38205100	BdiBd21-3.1G0962200.1	BdiBd21-3.1G0962200.1.p	PF01740,PF00916	PTHR11814,PTHR11814:SF101			K17470	GO:0016021,GO:0015116,GO:0008272,GO:0055085,GO:0016020,GO:0008271	AT1G22150.1	SULTR1	3	sulfate transporter 1	3	LOC_Os03g09970.4
BdiBd21-3.3G0511600	NA	243.749	0.756832	0.162735	4.65069	3.31e-06	0.003435	3.8535	6.35096	NA	NA	NA	NA	NA	NA	NA	NA	NA	NA	NA	NA	NA	NA	NA
BdiBd21-3.2G0412700	Bradi2g33110	387.825	0.788257	0.166875	4.72363	2.32e-06	0.002498	5.22956	8.81061	38193687	BdiBd21-3.2G0412700.1	BdiBd21-3.2G0412700.1.p	PF02535	PTHR11040,PTHR11040:SF52	KOG1558		K14709	GO:0055085,GO:0046873,GO:0030001,GO:0016020	AT1G10970.1	ATZIP4,ZIP4	zinc transporter 4 precursor	LOC_Os05g10940.1	NA	metal cation transporter, putative, expressed
BdiBd21-3.3G0527400	Bradi3g39997	456.353	0.917957	0.239589	3.83138	0.000127	0.076182	8.52208	15.6702	38232827	BdiBd21-3.3G0527400.1	BdiBd21-3.3G0527400.1.p	PF00232	PTHR10353,PTHR10353:SF65		3.2.1.21	K01188	GO:0005975,GO:0004553	AT2G44480.1	BGLU17	beta glucosidase 17	LOC_Os08g39870.1	NA	Os8bglu28 - beta-glucosidase homologue, similar to Os4bglu12 exoglucanase, expressed
BdiBd21-3.2G0203300	Bradi2g15490	435.341	1.03553	0.214372	4.83053	1.36e-06	0.001659	3.97724	7.95454	38194720	BdiBd21-3.2G0203300.1	BdiBd21-3.2G0203300.1.p	PF05496	PTHR23074,PTHR23074:SF98	KOG0737	3.6.4.3		GO:0009378,GO:0006310,GO:0006281	AT4G28000.1		P-loop containing nucleoside triphosphate hydrolases superfamily protein	LOC_Os05g50750.1	NA	AAA family ATPase, putative, expressed
BdiBd21-3.2G0124700	Bradi2g09434	74.2237	1.09319	0.264209	4.13758	3.51e-05	0.026589	0.569439	1.18487	38195373	BdiBd21-3.2G0124700.1	BdiBd21-3.2G0124700.1.p	PF00847,PF00931	PTHR23155,PTHR23155:SF641				GO:0006355,GO:0003700,GO:0043531	AT3G50950.2	ZAR1	HOPZ-ACTIVATED RESISTANCE 1	LOC_Os10g22484.1	NA	RGH2B, putative, expressed
BdiBd21-3.4G0092100	Bradi4g06740	1528.94	1.10958	0.137005	8.09881	5.55e-16	2.59e-12	23.6301	49.713	38198545	BdiBd21-3.4G0092100.1	BdiBd21-3.4G0092100.1.p	PF07168	PTHR31081,PTHR31081:SF3				GO:0071705	AT2G03530.2	ATUPS2,UPS2	ureide permease 2	LOC_Os12g31860.3	NA	ureide permease, putative, expressed
BdiBd21-3.3G0673300	Bradi3g50810	66.2272	1.32229	0.311679	4.24247	2.21e-05	0.017213	0.802252	1.95572	38224133	BdiBd21-3.3G0673300.1	BdiBd21-3.3G0673300.1.p	PF02358	PTHR10788,PTHR10788:SF41		3.1.3.12	K01087	GO:0005992,GO:0003824	AT5G51460.3	ATTPPA	Haloacid dehalogenase-like hydrolase (HAD) superfamily protein	LOC_Os02g44230.3	NA	CPuORF22 - conserved peptide uORF-containing transcript, expressed
BdiBd21-3.1G0513800	Bradi1g37870	295.932	1.41238	0.259227	5.44841	5.08e-08	7.91e-05	4.57687	11.9297	38217211	BdiBd21-3.1G0513800.4	BdiBd21-3.1G0513800.4.p	PF05153	PTHR12588,PTHR12588:SF1	KOG1573	1.13.99.1		GO:0055114,GO:0050113,GO:0019310,GO:0005737,GO:0005506	AT1G14520.1	MIOX1	myo-inositol oxygenase 1	LOC_Os06g36560.1	NA	inositol oxygenase, putative, expressed
BdiBd21-3.3G0099700	Bradi3g07500	57.515	1.42773	0.297785	4.7945	1.63e-06	0.001905	1.29432	3.41444	38233296	BdiBd21-3.3G0099700.1	BdiBd21-3.3G0099700.1.p	PF00153	PTHR24089,PTHR24089:SF281	KOG0752				AT4G32400.1	ATBT1,EMB104,EMB42,SHS1	Mitochondrial substrate carrier family protein	LOC_Os02g10800.3	NA	mitochondrial carrier protein, putative, expressed
BdiBd21-3.4G0337400	NA	35.1786	1.48914	0.372512	3.99755	6.4e-05	0.04521	7.98894	21.8676	NA	NA	NA	NA	NA	NA	NA	NA	NA	NA	NA	NA	NA	NA	NA
BdiBd21-3.4G0476700	Bradi4g34200	245.573	1.85747	0.222919	8.33249	7.92e-17	4.44e-13	3.48385	12.3093	38204519	BdiBd21-3.4G0476700.1	BdiBd21-3.4G0476700.1.p	PF07992	PTHR10961,PTHR10961:SF22	KOG2820		K00306	GO:0055114,GO:0016491	AT2G24580.1		FAD-dependent oxidoreductase family protein	LOC_Os09g32290.2	NA	FAD dependent oxidoreductase domain containing protein, expressed
BdiBd21-3.3G0654800	Bradi3g49360	51.6502	1.90884	0.46679	4.0893	4.33e-05	0.031915	0.40826	1.49965	38224210	BdiBd21-3.3G0654800.1	BdiBd21-3.3G0654800.1.p	PF00230	PTHR19139,PTHR19139:SF137	KOG0223		K09872	GO:0016020,GO:0006810,GO:0005215	AT2G37170.1	PIP2;2,PIP2B	plasma membrane intrinsic protein 2	LOC_Os02g41860.2	NA	aquaporin protein, putative, expressed
BdiBd21-3.1G0346100	Bradi1g26448	23.8206	2.12888	0.500278	4.25539	2.09e-05	0.016712	0.565112	2.43973	38211146	BdiBd21-3.1G0346100.1	BdiBd21-3.1G0346100.1.p											NA
BdiBd21-3.5G0066700	Bradi5g05110	8.30199	3.97126	1.04713	3.79253	0.000149	0.085303	0.074472	1.11389	38223111	BdiBd21-3.5G0066700.1	BdiBd21-3.5G0066700.1.p	PF00010	PTHR31945,PTHR31945:SF9				GO:0046983	AT5G57150.2		basic helix-loop-helix (bHLH) DNA-binding superfamily protein	LOC_Os04g23550.1	NA	basic helix-loop-helix family protein, putative, expressed
