# Supplementary material for: Opposite polarity programs regulate asymmetric subsidiary cell divisions in grasses
Source: eLife. 2022 Dec 20;11:e79913. doi: 10.7554/eLife.79913 (PMC9767456; doi:10.7554/eLife.79913)
Supplement: Supplementary file 2. [file elife-79913-supp2.xlsx]

## Sheet: Sheet1
Primer name	Sequence [5'-3']	Purpose
priDZ2	AACAGGTCTCATGTTTTGGTGACGATGGATGATGT	RP: Amplify BdPOLAR promoter
priDZ3	AACAGGTCTCAGGCTCCATGGCGACCGAGAGCAGC	FP: Amplify BdPOLAR (mutate BsaI site)
priDZ5	AACAGGTCTCACTGACCTGAGCCGGGACTCGTC	RP: Amplify BdPOLAR (without stop codon)
priDZ6	CGACCGATCCTCCAAACATT	FP: Genotype CRISPR BdPOLAR
priDZ7	TTTCGTCTGCGTCATTGCT	RP: Genotype CRISPR BdPOLAR
priDZ30	AACAGGTCTCAACCTCCGGGGAGATGGACATATGT	FP: Amplify BdPOLAR promoter
priDZ31	AACAGGTCTCGAGCAGTGAATTCGTGATCGC	FP: Amplify BdPOLAR (mutate BsaI site)
priDZ35	AACAGGTCTCATGCTCTCTCCATGGACGCG	RP: Amplify BdPOLAR (mutate BsaI site)
priDZ83	CCGCCATTAATCTCTCTCGG	RP: Genotype bdpolar-1
priDZ87	AAACCGGTACTGCTCCGGAGGCGC	RP: BdPOLAR-gR2-OsU6 (guide 2)
priDZ89	AAACCCGCGCCCTTGGATAGCAGC	RP: BdPOLAR-gR3-OsU6 (guide 4)
priDZ123	ACGTCTACGTAGGCGCGCCAACGCCATGCCAAATAGGATC	Gibson FP: BdPOLAR promoter
priDZ124	TCGCGACCATTTGGTGACGATGGATGATG	Gibson RP: BdPOLAR promoter
priDZ125	TCGTCACCAAATGGTCGCGAGGAGCCCC	Gibson FP: BdTAN1
priDZ126	TGCTCACCATAGATGATATTCTGCTTGAGACCGTCCG	Gibson RP: BdTAN1
priDZ127	AATATCATCTATGGTGAGCAAGGGCGAG	Gibson FP: mCitrine
priDZ128	GGGAAATTCGAGCTCCACCGCTACTTGTACAGCTCGTCCATG	Gibson RP: mCitrine
priDZ133	ACTTGGCGCCTCCGGAGCAGTACCG	FP: BdPOLAR-gR2-OsU6 (guide 2)
priDZ134	ACTTGGCTGCTATCCAAGGGCGCGG	FP: BdPOLAR-gR3-OsU6 (guide 4)
priDZ151	GGGAAATTCGAGCTCCACCGTTACACACATTGCACTTCCG	Gibson RP: BdPOLAR terminator
priMR343	GGCAGCGATGCGTGCCGCTCCCCG	FP: BdPOLAR-gR3-OsU6 (guide 3)
priMR344	AAACCGGGGAGCGGCACGCATCGC	FP: BdPOLAR-gR3-OsU6 (guide 3)
priMR410	AAAGTTCGACAGCGTGTCCG	Hyg1F
priMR411	TATTTCTTTGCCCTCGGACG	Hyg1R
priTN3	AACAGGTCTCAACCTGAAACTTCACGATCGGCTCT	Cloning ZmUbi promoter (FP)
priTN4	AACAGGTCTCATGTTGACCTGCAGAAGTAACACCA	Cloning ZmUbi promoter (RP)
priTN11	AACAGGTCTCAACTAAGAAGCCAACTAAACAAGACCA	Cloning HygR cassette (PvUBI2p driven) (FP)
priTN12	AACAGGTCTCAATACTTAATTCGGGGGATCTGGATTT	Cloning HygR cassette (PvUBI2p driven) (RP)
priTN29	AACAGGTCTCATATCATTTCGGATACCA	FP to mutate BsaI site in PvUbi2promoter in HygR cassette (used with priTN12)
priTN30	AACAGGTCTCAGATAGTGCTCAC	RP to mutate BsaI site in PvUbi2promoter in HygR cassette (used with priTN11)
Ala_linker-F	CGCGCAGCAGCAGCGGCTGCCGCTGCGGCAGCAGGG	Double-stranded oligo for poly Alanine linker
Ala_linker-R	CGCGCCCTGCTGCCGCAGCGGCAGCCGCTGCTGCTG	Double-stranded oligo for poly Alanine linker
PAN1fwd	CACCTAGCTCGCAATGGCGGCTG	BdPAN1 genomic sequence amplification
PAN1rev	GCAGTTGTTGATCCGGTCGAGG	BdPAN1 genomic sequence amplification
AscI_FP_noATG-1F	GGCGCGCCGTGAGCAAGGGCGAGGAG	CitrineYFP cloning
AscI_FP_stop-1R	GGCGCGCCTTACTTGTACAGCTCGTCCATGC	CitrineYFP cloning
PAN1profwd	GGCGCGCCGTTGGGTTACCGATGATATGC	BdPAN1 promoter amplification
PAN1prorev	GGCGCGCCGAGCTACGGAGGAAGCAC	BdPAN1 promoter amplification
