# Supplementary figures and images for: Opposite polarity programs regulate asymmetric subsidiary cell divisions in grasses
Source: eLife journal article supplement (doi:10.7554/elife.79913), 2022-12-06

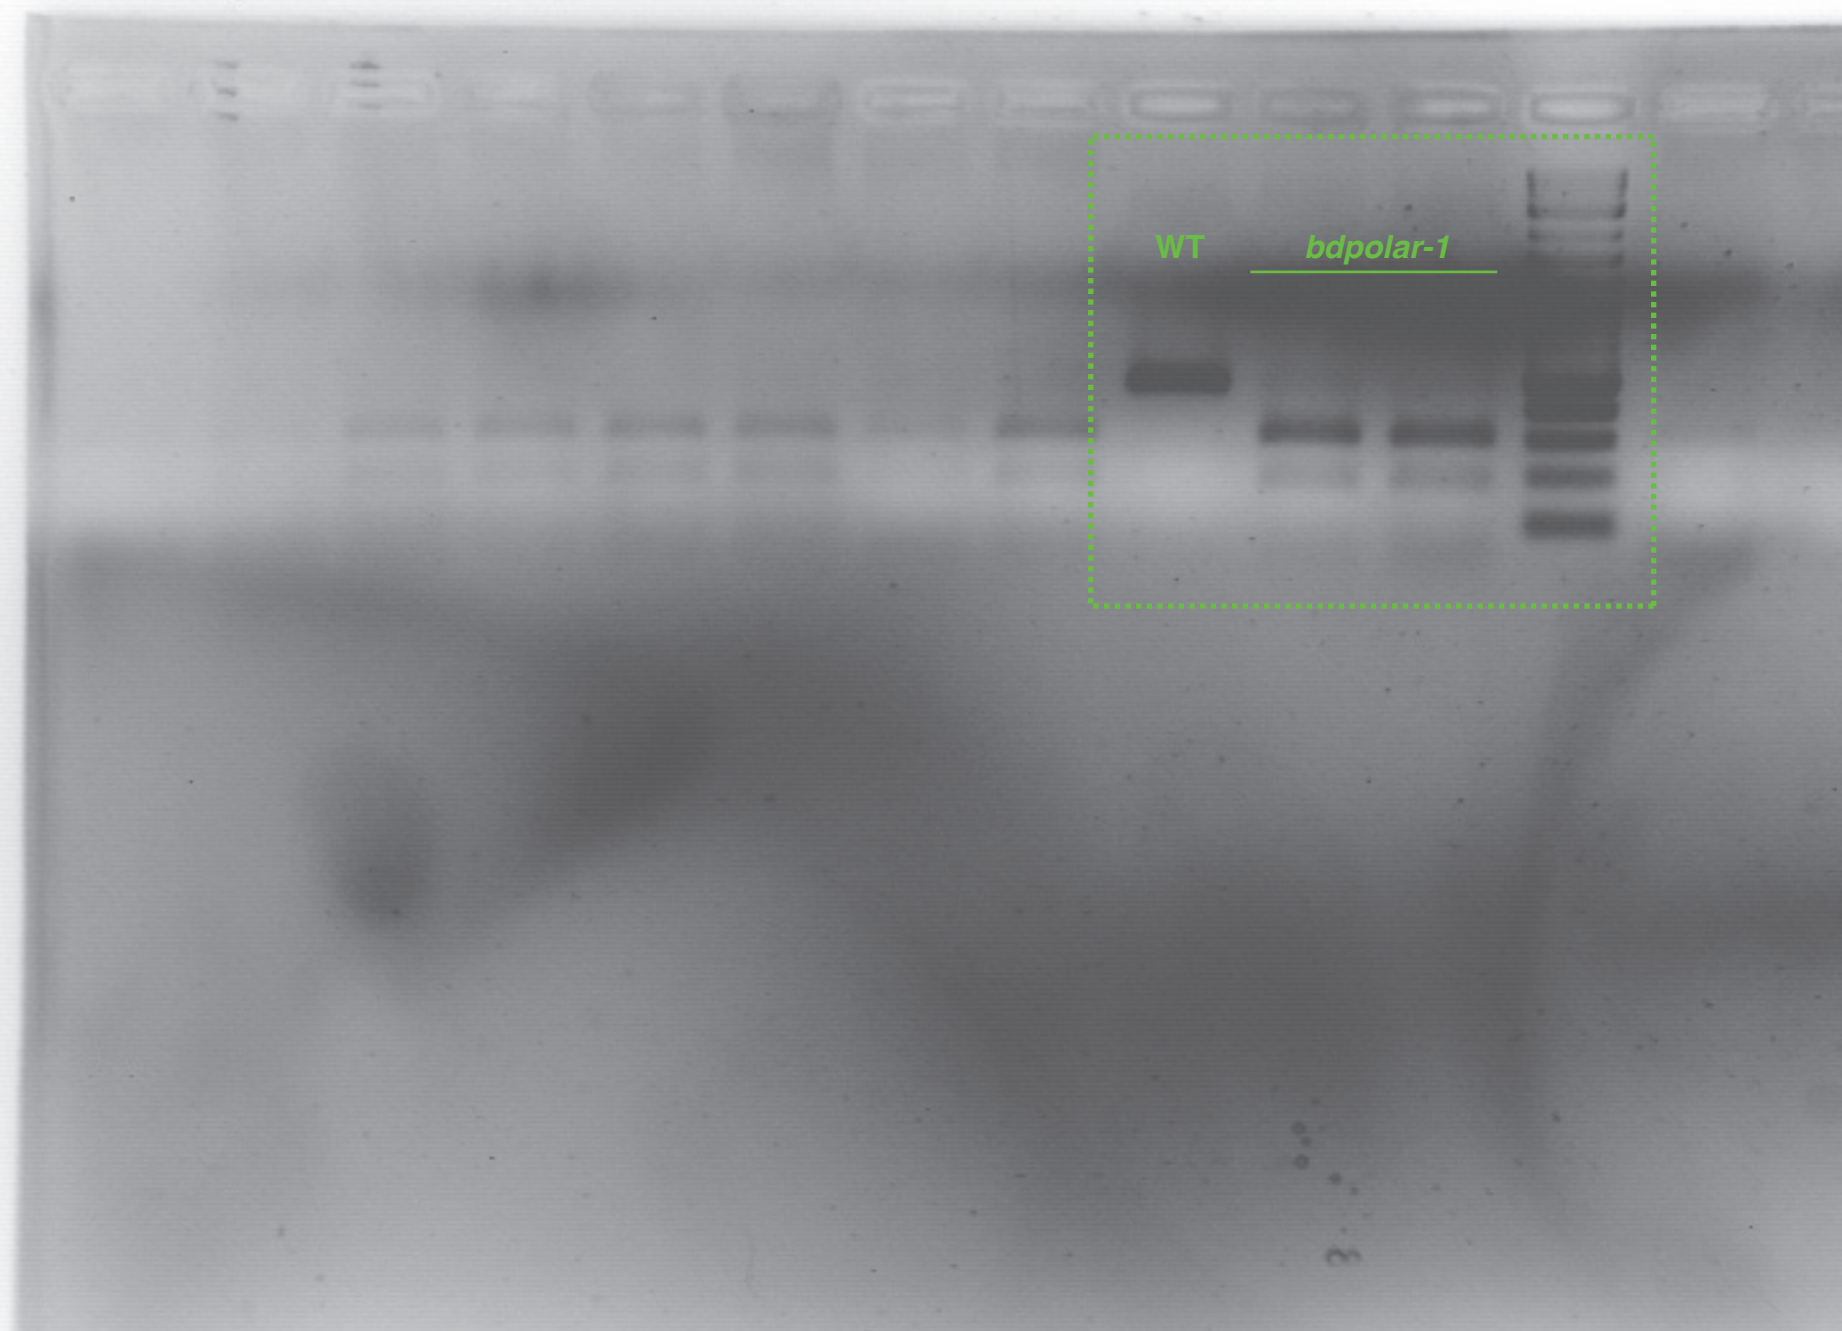

Supplement: fig1-figsupp2-data1 [file elife-79913-fig1-figsupp2-data1-v1.zip]
